# Supplementary material for: Integrated Proteomics-Based Physical and Functional Mapping of AXL Kinase Signaling Pathways and Inhibitors Define Its Role in Cell Migration
Source: Oxford University Press journal article supplement (doi:10.1158/1541-7786.mcr-21-0275), 2022-01-12
Supplement: mcr-21-0275_supplementary_table_s3_supps3.xlsx [file mcr-21-0275_supplementary_table_s3_supps3.xlsx]

## Sheet: pY_all
Supplemental Table S3. A) Normalized log2 abundances for pY enrichment assay.																		Injection	1	2	1	2	1	2	1	2	1	2	1	2	1	2	1	2	1	2	Average injection replicates									Avgerage biological replicates			Log2 ratios
																		Biorep	1	1	2	2	3	3	1	1	2	2	3	3	1	1	2	2	3	3	1	2	3	1	2	3	1	2	3
																		Condition	DMSO	DMSO	DMSO	DMSO	DMSO	DMSO	0.5 hr	0.5 hr	0.5 hr	0.5 hr	0.5 hr	0.5 hr	4 hr	4 hr	4 hr	4 hr	4 hr	4 hr	DMSO	DMSO	DMSO	0.5 hr	0.5 hr	0.5 hr	4 hr	4 hr	4 hr
ModificationID	Leading Proteins	Has_Contaminant_Flag	All_Reverse_Flag	Cow_Contaminant_Flag	PEP	Charge	Mass Error [ppm]	Number of Phospho (STY)	Localization Prob	Phospho (STY) Probabilities	Positions	Amino Acid	GeneID	Symbol	Alias	Type	Location	Description	DMSO1-1	DMSO1-2	DMSO2-1	DMSO2-2	DMSO3-1	DMSO3-2	Rxdx10630MIN1-1	Rxdx10630MIN1-2	Rxdx10630MIN2-1	Rxdx10630MIN2-2	Rxdx10630MIN3-1	Rxdx10630MIN3-2	Rxdx1064hr1-1	Rxdx1064hr1-2	Rxdx1064hr2-1	Rxdx1064hr2-2	Rxdx1064hr3-1	Rxdx1064hr3-2	DMSO1	DMSO2	DMSO3	RXDX10630MIN1	RXDX10630MIN2	RXDX10630MIN3	RXDX1064hr1	RXDX1064hr2	RXDX1064hr3	Avg DMSO	Avg 0.5 hr	Avg 4 hr	0.5 vs. DMSO
ph_Q09666:5836	Q09666	0	0	0	9.39554e-150	3	-0.035076	1;2	0.99442	S(0.002)KGHY(0.994)EVT(0.073)GS(0.93)DDETGKLQGSGVSLASK	5836	Y	79026	AHNAK	AHNAKRS PM227	protein-coding	11q12.3	AHNAK nucleoprotein ||| Neuroblast differentiation-associated protein AHNAK	24.1153	23.8799	24.4769	23.4667	24.0566	23.69	18.9781	20.6711	19.4929	18.0812	20.5494	19.3293	20.4745	20.4845	20.4837		20.282	20.3392	23.9976	23.9718	23.8733	19.8246	18.7871	19.9394	20.4795	20.4837	20.3106	23.9476	19.517	20.4246	-4.43058
ph_Q6IAA8:40	Q6IAA8	0	0	0	8.83666e-14	3	-0.020063	1	0.990523	ALNGAEPNY(0.991)HS(0.009)LPS(0.001)AR	40	Y	55004	LAMTOR1	C11orf59 PDRO Ragulator1 p18 p27RF-Rho	protein-coding	11q13.4	late endosomal/lysosomal adaptor, MAPK and MTOR activator 1 ||| Ragulator complex protein LAMTOR1	20.9154		21.2799		21.1578			19.6484				17.6108	19.5882		19.1101	19.4123	19.5959	19.034	20.9154	21.2799	21.1578	19.6484	NA	17.6108	19.5882	19.2612	19.3149	21.1177	18.6296	19.3881	-2.48806
ph_Q99569:1094	Q99569	0	0	0	1.30966e-29	3	0.26778	1	0.971457	GLYPGSSKPS(0.003)PIY(0.971)IS(0.015)S(0.004)Y(0.005)SSPAR	1094	Y	8502	PKP4	p0071	protein-coding	2q24.1	plakophilin 4 ||| Plakophilin-4	20.7383		20.7505		20.7911		19.7507		16.0587					19.9683		20.0106	19.3699	19.5626	20.7383	20.7505	20.7911	19.7507	16.0587	NA	19.9683	20.0106	19.4663	20.76	17.9047	19.8151	-2.85531
ph_Q9UQC2:293	Q9UQC2	0	0	0	3.08641e-34	3	-0.01787	1	0.937153	GSLTGS(0.003)ET(0.003)DNEDVY(0.937)T(0.057)FKTPSNTLCR	293	Y	9846	GAB2	---	protein-coding	11q14.1	GRB2 associated binding protein 2 ||| GRB2-associated-binding protein 2	20.8302	21.0434	21.1128			20.3688	19.5389	19.144	19.6516		19.3294			20.2905		20.3466			20.9368	21.1128	20.3688	19.3414	19.6516	19.3294	20.2905	20.3466	NA	20.8061	19.4408	20.3186	-1.36533
ph_Q9Y5K6:361	Q9Y5K6	0	0	0	3.61174e-10	2	0.615	1	0.999929	Y(1)FSLKPEEKDEK	361	Y	23607	CD2AP	CMS	protein-coding	6p12.3	CD2 associated protein ||| CD2-associated protein	21.0261	21.76	21.3163	20.8022	20.8456	20.793	20.4174	20.1317	19.8851						21.4575			20.3467	21.3931	21.0593	20.8193	20.2746	19.8851	NA	NA	21.4575	20.3467	21.0905	20.0798	20.9021	-1.01072
ph_P08069:1165	P08069	0	0	0	7.28155e-08	2	0.4895	1;2	0.848482	DIY(1)ET(0.03)DY(0.848)Y(0.121)RKGGK	1165	Y	3480 3643	IGF1R INSR	CD221 IGFIR IGFR JTK13 CD220 HHF5	protein-coding	15q26.3!19p13.2	insulin like growth factor 1 receptor ||| Insulin-like growth factor 1 receptor ||| insulin receptor	19.7328	20.1163	20.886	20.4106	19.2005	20.2561	19.7121	19.3982	19.3432	18.9939	19.3226		19.5255	20.3848	19.498	20.3203	20.6418	19.265	19.9246	20.6483	19.7283	19.5551	19.1686	19.3226	19.9552	19.9092	19.9534	20.1004	19.3488	19.9393	-0.751626
ph_Q9UHR4:276	Q9UHR4	0	0	0	3.11007e-07	2	0.065561	1;2	0.997593	KDY(1)DT(0.998)LS(0.002)KCSPK	276	T	55971	BAIAP2L1	IRTKS	protein-coding	7q21.3-q22.1	BAR/IMD domain containing adaptor protein 2 like 1 ||| Brain-specific angiogenesis inhibitor 1-associated protein 2-like protein 1	21.0132		21.5094	21.1377	21.4727	20.9387		19.837	23.5324				19.8012	19.2112	20.0749			19.3685	21.0132	21.3236	21.2057	19.837	23.5324	NA	19.5062	20.0749	19.3685	21.1808	21.6847	19.6499	0.503862
ph_Q13443:778	Q13443	0	0	0	0.00055797	2	0.27828	1	0.962962	FAVPT(0.037)Y(0.963)AAK	778	Y	8754	ADAM9	CORD9 MCMP MDC9 Mltng	protein-coding	8p11.22	ADAM metallopeptidase domain 9 ||| Disintegrin and metalloproteinase domain-containing protein 9	21.4738	18.6302	21.837	21.6262	21.936	18.978	21.5783	21.6598	21.5438	21.7939		21.7607	19.1299	21.6249	21.1219	19.0237	18.3927	21.5621	20.052	21.7316	20.457	21.619	21.6689	21.7607	20.3774	20.0728	19.9774	20.7469	21.6829	20.1425	0.935995
ph_P10586;Q13332:1381;1422	P10586;Q13332	0	0	0	0.000194829	2	-1.3104	1	0.999998	Y(1)ANVIAYDHSR	1381;1422	Y	5789 5792 5802	PTPRD PTPRF PTPRS	HPTP HPTPD HPTPDELTA PTPD RPTPDELTA BNAH2 LAR PTPSIGMA R-PTP-S R-PTP-sigma	protein-coding	9p24.1-p23!1p34.2!19p13.3	protein tyrosine phosphatase receptor type D ||| Receptor-type tyrosine-protein phosphatase delta ||| protein tyrosine phosphatase receptor type F ||| Receptor-type tyrosine-protein phosphatase F ||| protein tyrosine phosphatase receptor type S ||| Receptor-type tyrosine-protein phosphatase S	19.4163	19.3499	19.1223		19.6233	19.4103	19.7318	19.7883	20.0708	19.3844	19.436	19.7724			18.9809		18.9978		19.3831	19.1223	19.5168	19.7601	19.7276	19.6042	NA	18.9809	18.9978	19.3407	19.6973	18.9893	0.356541
ph_P08581:1234	P08581	0	0	0	0	3	-0.13382	1;2	0.99887	DMYDKEY(0.999)Y(0.961)S(0.041)VHNKTGAK	1234	Y	4233	MET	AUTS9 DFNB97 HGFR RCCP2 c-Met	protein-coding	7q31.2	MET proto-oncogene, receptor tyrosine kinase ||| Hepatocyte growth factor receptor	26.4587	26.4562	26.8187	26.3902	26.5337	26.3529	24.5558	24.4254	24.5747	24.2736	24.0604	23.6803	20.2754	20.2596	20.4933	20.1274	20.1825	19.8782	26.4574	26.6044	26.4433	24.4906	24.4242	23.8703	20.2675	20.3103	20.0303	26.5017	24.2617	20.2027	-2.24003
ph_Q96Q15:2150	Q96Q15	0	0	0	0.0021289	1	0.10237	1	0.905106	S(0.085)Y(0.905)PY(0.009)LFK	2150	Y	23049	SMG1	61E3.4 ATX LIP	protein-coding	16p12.3	SMG1 nonsense mediated mRNA decay associated PI3K related kinase ||| Serine/threonine-protein kinase SMG1	22.2847	22.9393	21.9501	22.8003	22.7666	23.2778			20.1903	20.592		20.2953	16.9674	17.0941	17.0241	17.6731	16.9305	17.6058	22.612	22.3752	23.0222	NA	20.3912	20.2953	17.0307	17.3486	17.2681	22.6698	20.3432	17.2158	-2.32657
ph_O75955:203	O75955	0	0	0	1.62335e-55	2	-0.48523	1	0.999955	VSAQY(1)LSEIEMAK	203	Y	10211	FLOT1	---	protein-coding	6p21.33	flotillin 1 ||| Flotillin-1	23.5478	24.0446	23.8546	24.1769	23.8141	23.9267	22.2626	22.4662	22.3737	22.6051	21.8846	22.2239	20.048			20.1945		20.0923	23.7962	24.0158	23.8704	22.3644	22.4894	22.0543	20.048	20.1945	20.0923	23.8941	22.3027	20.1116	-1.59142
ph_Q08357:377	Q08357	0	0	0	4.7435e-34	3	-0.065807	1	0.96763	IHIDRGPEEKPAQES(0.032)NY(0.968)R	377	Y	6575	SLC20A2	GLVR-2 GLVR2 IBGC1 IBGC2 IBGC3 MLVAR PIT-2 PIT2 RAM1 Ram-1	protein-coding	8p11.21	solute carrier family 20 member 2 ||| Sodium-dependent phosphate transporter 2	22.2403	22.4455	22.7386		22.2816		20.3774	19.9884			19.4674	19.7554	18.3836		17.8989	17.1759	18.3987		22.3429	22.7386	22.2816	20.1829	NA	19.6114	18.3836	17.5374	18.3987	22.4544	19.8972	18.1066	-2.55721
ph_P30530:866	P30530	0	0	0	9.92411e-132	2	-0.18614	1	1	Y(1)VLCPSTTPSPAQPADR	866	Y	558	AXL	ARK JTK11 Tyro7 UFO	protein-coding	19q13.2	AXL receptor tyrosine kinase ||| Tyrosine-protein kinase receptor UFO	24.8955	24.71	25.2771	24.442	25.4462	25.0795	22.6583	22.3313	22.9342	22.4812	22.7521	22.6082	22.1505	21.6174	21.9954	21.9743	22.5217	21.9908	24.8027	24.8596	25.2628	22.4948	22.7077	22.6801	21.8839	21.9848	22.2562	24.975	22.6275	22.0417	-2.34751
ph_Q99569:1115	Q99569	0	0	0	1.83412e-52	3	-0.7297	1	0.999953	LQHQQLY(1)YSQDDSNRK	1115	Y	8502	PKP4	p0071	protein-coding	2q24.1	plakophilin 4 ||| Plakophilin-4	22.0107	21.9278	22.6622	22.0522	21.8267	21.6912	19.5193	19.6159	19.9071	20.0938	19.301	19.3551	19.5012	18.9046	18.7243	18.571	18.4938	18.1271	21.9693	22.3572	21.759	19.5676	20.0005	19.328	19.2029	18.6476	18.3104	22.0285	19.632	18.7203	-2.39646
ph_Q7Z2W4:410	Q7Z2W4	0	0	0	7.22335e-78	2	-0.086641	1	0.999884	KGTGLLSSDY(1)R	410	Y	56829	ZC3HAV1	ARTD13 FLB6421 PARP13 ZAP ZC3H2 ZC3HDC2	protein-coding	7q34	zinc finger CCCH-type containing, antiviral 1 ||| Zinc finger CCCH-type antiviral protein 1	22.4505	22.3794	22.7023	22.8982	22.3743	22.525	20.9413	20.892	20.8767	21.2156		20.4093	19.1757		19.8657	19.7105	19.5049	19.7271	22.415	22.8002	22.4497	20.9166	21.0462	20.4093	19.1757	19.7881	19.616	22.5549	20.7907	19.5266	-1.76423
ph_Q9Y446:84	Q9Y446	0	0	0	9.39309e-70	2	1.1533	1	1	GQY(1)HTLQAGFSSR	84	Y	11187	PKP3	---	protein-coding	11p15.5	plakophilin 3 ||| Plakophilin-3	22.0694	22.0398	22.6472	22.1048	22.2746	22.0963	20.6579		20.9269	20.7788	20.7341		20.1355	19.9649	20.3743	20.1664		19.8373	22.0546	22.376	22.1855	20.6579	20.8528	20.7341	20.0502	20.2704	19.8373	22.2054	20.7483	20.0526	-1.45705
ph_O60716:904	O60716	0	0	0	8.45636e-55	2	-0.078756	1	0.999605	SLDNNY(1)STPNER	904	Y	1500 100528016	CTNND1 TMX2-CTNND1	BCDS2 CAS CTNND P120CAS P120CTN p120 p120(CAS) p120(CTN) CTNND1 p120(cas) p120(ctn)	protein-coding|ncRNA	11q12.1	catenin delta 1 ||| TMX2-CTNND1 readthrough (NMD candidate) ||| Catenin delta-1	24.8493	24.6782	25.4559	25.1955	25.1782	24.8048	23.2301	23.1563	23.8794	23.6409	23.1965	22.9732	22.5431	22.4582	22.5724	22.3647	22.4786	22.0356	24.7638	25.3257	24.9915	23.1932	23.7602	23.0849	22.5006	22.4686	22.2571	25.027	23.3461	22.4088	-1.68092
ph_Q06124:595	Q06124	0	0	0	5.29325e-52	3	2.5539	2	1	VY(1)ENVGLMQQQKS(1)FR	595	S	5781	PTPN11	BPTP3 CFC JMML METCDS NS1 PTP-1D PTP2C SH-PTP2 SH-PTP3 SHP2	protein-coding	12q24.13	protein tyrosine phosphatase non-receptor type 11 ||| Tyrosine-protein phosphatase non-receptor type 11	20.9096	20.9934	21.2572	21.1892	20.7769	20.4926	19.1497	19.3531	19.6545		18.9527	18.507	18.5375		18.7484	18.6023	18.769	17.9957	20.9515	21.2232	20.6347	19.2514	19.6545	18.7299	18.5375	18.6754	18.3823	20.9365	19.2119	18.5317	-1.72454
ph_O60716:335	O60716	0	0	0	3.07397e-16	3	0.094119	1	0.705217	SYEDMIGEEVPS(0.077)DQY(0.218)Y(0.705)WAPLAQHER	335	Y	1500 100528016	CTNND1 TMX2-CTNND1	BCDS2 CAS CTNND P120CAS P120CTN p120 p120(CAS) p120(CTN) CTNND1 p120(cas) p120(ctn)	protein-coding|ncRNA	11q12.1	catenin delta 1 ||| TMX2-CTNND1 readthrough (NMD candidate) ||| Catenin delta-1		20.2845	20.2075	20.7518	20.6433	20.7941	19.1189	19.1282			18.3631	19.0309	17.7711	18.0353	18.0497	17.5372	17.9747	17.8388	20.2845	20.4796	20.7187	19.1235	NA	18.697	17.9032	17.7935	17.9068	20.4943	18.9103	17.8678	-1.58401
ph_Q8IV08:7	Q8IV08	0	0	0	4.10331e-07	2	-0.020768	1	1	LMY(1)QELK	7	Y	23646	PLD3	AD19 HU-K4 HUK4 SCA46	protein-coding	19q13.2	phospholipase D family member 3 ||| 5'-3' exonuclease PLD3	21.8265	22.2808	21.7285	21.8363	22.5098	22.9818	21.9063		21.8838	22.241	21.9359	22.1087		19.6777			19.5133		22.0537	21.7824	22.7458	21.9063	22.0624	22.0223	19.6777	NA	19.5133	22.1939	21.997	19.5955	-0.196942
ph_O43491:614	O43491	0	0	0	6.81188e-153	3	0.32066	2	1	KNS(1)LRVEGDNIY(1)VR	614	S	2037	EPB41L2	4.1-G 4.1G	protein-coding	6q23.1-q23.2	erythrocyte membrane protein band 4.1 like 2 ||| Band 4.1-like protein 2	24.0076	24.1527	24.312	23.9925	24.0819	24.1857	23.4283	23.5244	23.4144	23.3431	23.1566	23.4499	22.6939	22.8211	22.7127	22.598	22.636	22.3739	24.0802	24.1522	24.1338	23.4764	23.3788	23.3032	22.7575	22.6554	22.5049	24.1221	23.3861	22.6393	-0.735949
ph_Q12929:525	Q12929	0	0	0	5.19772e-09	2	0.78101	1	1	HIDRNY(1)EPLK	525	Y	2059	EPS8	DFNB102	protein-coding	12p12.3	epidermal growth factor receptor pathway substrate 8 ||| Epidermal growth factor receptor kinase substrate 8	20.4967	20.2756	20.5846	20.235	19.966	20.2321		19.3328	19.3473	19.2893	19.2243	18.9546	18.3465	18.8824	18.7419	18.53			20.3862	20.4098	20.099	19.3328	19.3183	19.0894	18.6144	18.6359	NA	20.2983	19.2468	18.6252	-1.05151
ph_Q99569:421	Q99569	0	0	0	2.96415e-13	2	0.7721	1	0.999454	TYY(0.999)SPVYR	421	Y	8502	PKP4	p0071	protein-coding	2q24.1	plakophilin 4 ||| Plakophilin-4	21.2046	21.4239	21.5592	22.0936	21.5692	21.7128	20.3746	20.595	20.4656	20.6275	20.2852	20.5222	19.9605	20.0243	19.8421	19.8429	19.6256	19.7471	21.3142	21.8264	21.641	20.4848	20.5466	20.4037	19.9924	19.8425	19.6863	21.5939	20.4784	19.8404	-1.11553
ph_Q9HAU0:398	Q9HAU0	0	0	0	1.71392e-28	3	-0.11308	1	0.972458	GGNRPNTGPLY(0.972)T(0.027)EADRVIQR	398	Y	54477	PLEKHA5	PEPP-2 PEPP2	protein-coding	12p12.3	pleckstrin homology domain containing A5 ||| Pleckstrin homology domain-containing family A member 5	20.7855		20.9179				19.2441	19.3521	19.1214			18.6246			18.705	18.1055		17.8014	20.7855	20.9179	NA	19.2981	19.1214	18.6246	NA	18.4052	17.8014	20.8517	19.0147	18.1033	-1.83698
ph_P56211:59	P56211	0	0	0	0.000155937	2	-0.08786	1	0.99785	Y(0.998)FDS(0.001)GDY(0.001)NMAK	59	Y	10776 2029	ARPP19 ENSA	ARPP-16 ARPP-19 ARPP16 ENSAL ARPP-19e	protein-coding	15q21.2!1q21.3	cAMP regulated phosphoprotein 19 ||| cAMP-regulated phosphoprotein 19 ||| endosulfine alpha ||| Alpha-endosulfine		19.9176	20.0045	19.5442		19.908	19.0112		19.3082	18.9495	19.0176		18.5366		18.5712		17.8909	18.5324	19.9176	19.7744	19.908	19.0112	19.1289	19.0176	18.5366	18.5712	18.2117	19.8667	19.0525	18.4398	-0.814125
ph_Q8WUD1:3	Q8WUD1	0	0	0	0.0180778	2	0.20966	---	0.983916	T(0.016)Y(0.984)AYLFK	3	Y	84932	RAB2B	---	protein-coding	14q11.2	RAB2B, member RAS oncogene family ||| Ras-related protein Rab-2B	19.8126	20.2533	19.6533	20.2053	20.335	20.6435	20.0166	20.4203	19.9096	14.2507	20.3063		17.0334	18.2769	17.443	17.1992	17.6329	17.7367	20.033	19.9293	20.4893	20.2185	17.0802	20.3063	17.6552	17.3211	17.6848	20.1505	19.2016	17.5537	-0.948867
ph_Q99569:443	Q99569	0	0	0	3.55283e-15	3	0.57204	1	0.99693	SPNHGTVELQGS(0.001)QT(0.002)ALY(0.997)R	443	Y	8502	PKP4	p0071	protein-coding	2q24.1	plakophilin 4 ||| Plakophilin-4	19.9721		20.4388			20.1739	19.505		19.1291	19.2445	19.3449	18.618			18.4817			18.4509	19.9721	20.4388	20.1739	19.505	19.1868	18.9815	NA	18.4817	18.4509	20.1949	19.2244	18.4663	-0.970511
ph_O95297:263	O95297	0	0	0	7.0848e-18	2	-0.37756	1;2	0.999999	SESVVY(1)ADIR	263	Y	9019	MPZL1	MPZL1b PZR PZR1b PZRa PZRb	protein-coding	1q24.2	myelin protein zero like 1 ||| Myelin protein zero-like protein 1	24.1831	21.6807	21.9243	21.278	21.8423	21.5333	21.2504	21.0868	21.0917	21.136	21.0088	20.8297	19.9805		19.91	20.033		19.9439	22.9319	21.6012	21.6878	21.1686	21.1138	20.9193	19.9805	19.9715	19.9439	22.0736	21.0672	19.9653	-1.0064
ph_P29353:426	P29353	0	0	0	1.86565e-26	3	1.5299	1	0.550645	ELFDDPS(0.551)Y(0.449)VNVQNLDKAR	426	S	6464	SHC1	SHC SHCA	protein-coding	1q21.3	SHC adaptor protein 1 ||| SHC-transforming protein 1		22.0756				21.2103	20.2372	20.2358	19.9454			19.5221	18.507	18.9162	19.0435	19.1401	19.281		22.0756	NA	21.2103	20.2365	19.9454	19.5221	18.7116	19.0918	19.281	21.643	19.9013	19.0281	-1.74163
ph_O75955:238	O75955	0	0	0	3.42166e-08	2	0.14467	1	1	RAQADLAY(1)QLQVAK	238	Y	10211	FLOT1	---	protein-coding	6p21.33	flotillin 1 ||| Flotillin-1	19.4864	19.6155	19.5603		19.5709		19.4394		19.281		19.4916		18.2383	18.5536	18.2133	18.304	18.4125		19.551	19.5603	19.5709	19.4394	19.281	19.4916	18.3959	18.2586	18.4125	19.5607	19.404	18.3557	-0.156737
ph_Q96PD2:597	Q96PD2	0	0	0	1.42305e-06	2	0.020089	1	0.935485	Y(0.935)S(0.064)SSEVNHLSPR	597	Y	131566	DCBLD2	CLCP1 ESDN	protein-coding	3q12.1|3	discoidin, CUB and LCCL domain containing 2 ||| Discoidin, CUB and LCCL domain-containing protein 2	20.1204	19.7368	20.5595	20.5539	20.4459	20.6644	19.2706		20.2966	20.2443	19.2982		18.4295			18.3013			19.9286	20.5567	20.5551	19.2706	20.2705	19.2982	18.4295	18.3013	NA	20.3468	19.6131	18.3654	-0.73373
ph_O60716:334	O60716	0	0	0	5.7304e-18	3	-0.14824	1	0.618426	SYEDMIGEEVPS(0.202)DQY(0.618)Y(0.179)WAPLAQHER	334	Y	1500 100528016	CTNND1 TMX2-CTNND1	BCDS2 CAS CTNND P120CAS P120CTN p120 p120(CAS) p120(CTN) CTNND1 p120(cas) p120(ctn)	protein-coding|ncRNA	11q12.1	catenin delta 1 ||| TMX2-CTNND1 readthrough (NMD candidate) ||| Catenin delta-1			19.6827			20.4321	18.7564	19.1271		18.8018	18.0492	18.6945	17.3288			17.9848		17.9841	NA	19.6827	20.4321	18.9418	18.8018	18.3718	17.3288	17.9848	17.9841	20.0574	18.7051	17.7659	-1.35228
ph_O95832:210	O95832	0	0	0	2.16449e-09	2	0.43805	1	0.999384	PYPKPAPSSGKDY(0.999)V	210	Y	9076	CLDN1	CLD1 ILVASC SEMP1	protein-coding	3q28	claudin 1 ||| Claudin-1	22.0481		21.7978	22.0325	21.9684	22.2241	21.4958	21.8662				21.2562	20.3657	20.7723	20.836	20.5074	20.8297	20.5015	22.0481	21.9151	22.0962	21.681	NA	21.2562	20.569	20.6717	20.6656	22.0198	21.4686	20.6354	-0.551238
ph_P16144:1510	P16144	0	0	0	1.40235e-15	2	-0.082778	1	0.999675	DY(1)STLTSVSSHDSR	1510	Y	3691	ITGB4	CD104 GP150	protein-coding	17q25.1	integrin subunit beta 4 ||| Integrin beta-4	20.04		20.6861	20.246	20.5645				19.704	19.4512	19.2929	18.6942	18.5053	17.7454	18.9521	18.7127	19.2046	18.4091	20.04	20.466	20.5645	NA	19.5776	18.9935	18.1254	18.8324	18.8069	20.3568	19.2856	18.5882	-1.07127
ph_Q96PD2:732	Q96PD2	0	0	0	1.06971e-05	2	-0.23549	1	0.762991	TDSCS(0.002)S(0.005)AQAQY(0.763)DT(0.23)PK	732	Y	131566	DCBLD2	CLCP1 ESDN	protein-coding	3q12.1|3	discoidin, CUB and LCCL domain containing 2 ||| Discoidin, CUB and LCCL domain-containing protein 2			20.9937		21.5855		20.2079	20.1989				19.8536		19.6231	19.6825	19.2875		18.8972	NA	20.9937	21.5855	20.2034	NA	19.8536	19.6231	19.485	18.8972	21.2896	20.0285	19.3351	-1.26109
ph_O75955:223	O75955	0	0	0	0.000507789	2	-0.16394	1	0.999976	KAAY(1)DIEVNTR	223	Y	10211	FLOT1	---	protein-coding	6p21.33	flotillin 1 ||| Flotillin-1	20.2344	20.1057	20.4713	20.3412	20.6993		20.2527		20.4523	20.3832			19.6326			18.9601	19.2672		20.17	20.4062	20.6993	20.2527	20.4178	NA	19.6326	18.9601	19.2672	20.4252	20.3352	19.2866	-0.0899637
ph_P27361:202	P27361	0	0	0	1.99916e-30	3	0.05241	2	0.998354	IADPEHDHTGFLT(0.998)EY(0.988)VAT(0.013)R	202	T	5595	MAPK3	ERK-1 ERK1 ERT2 HS44KDAP HUMKER1A P44ERK1 P44MAPK PRKM3 p44-ERK1 p44-MAPK	protein-coding	16p11.2	mitogen-activated protein kinase 3	20.9351	21.1182	20.5834	21.0584	20.6443		21.0741	21.1957	20.9558	20.7593	20.7276		21.9329	21.7763	21.8743	21.8464	21.9122	21.8909	21.0267	20.8209	20.6443	21.1349	20.8576	20.7276	21.8546	21.8604	21.9015	20.8306	20.9067	21.8722	0.0760573
ph_P06493:14	P06493	0	0	0	1.01778e-244	3	-0.25395	1;2	1	IGEGT(1)Y(1)GVVYKGR	14	T	983	CDK1	CDC2 CDC28A P34CDC2	protein-coding	10q21.2	cyclin dependent kinase 1 ||| Cyclin-dependent kinase 1	26.8193	26.8549	27.0628	26.7632	27.6605	27.4354	27.3554	27.4616	27.5446	27.5268	27.7263	27.7998	28.3549	27.9323	28.0981	28.3736	28.2211	28.0944	26.8371	26.913	27.548	27.4085	27.5357	27.7631	28.1436	28.2358	28.1577	27.0994	27.5691	28.179	0.469734
ph_P06493:15	P06493	0	0	0	1.01778e-244	2	-0.70634	1;2	1	IGEGT(1)Y(1)GVVYKGR	15	Y	983	CDK1	CDC2 CDC28A P34CDC2	protein-coding	10q21.2	cyclin dependent kinase 1 ||| Cyclin-dependent kinase 1	27.5579	27.5331	27.7997	27.4646	28.1949	28.0196	28.0362	28.0119	28.0838	27.9967	28.2738	28.2938	28.9724	28.5463	28.6311	28.8455	28.8424	28.7132	27.5455	27.6321	28.1072	28.024	28.0403	28.2838	28.7594	28.7383	28.7778	27.7616	28.116	28.7585	0.354389
ph_P28482:187	P28482	0	0	0	1.65471e-216	3	-0.086102	1;2	0.998424	VADPDHDHTGFLT(1)EY(0.998)VAT(0.002)R	187	Y	5594	MAPK1	ERK ERK-2 ERK2 ERT1 MAPK2 P42MAPK PRKM1 PRKM2 p38 p40 p41 p41mapk p42-MAPK	protein-coding	22q11.22	mitogen-activated protein kinase 1	27.6411	27.6964	27.332	27.0739	27.5883	27.4956	27.6941	27.589	27.2559	27.1556	27.6283	27.6868	28.3601	28.1124	27.9394	28.0683	28.0695	28.0251	27.6687	27.2029	27.5419	27.6415	27.2057	27.6575	28.2363	28.0039	28.0473	27.4712	27.5016	28.0958	0.0304216
ph_P30530:702	P30530	0	0	0	1.03212e-209	2	-0.28155	1;2	0.999988	KIYNGDY(1)Y(1)RQGR	702	Y	558	AXL	ARK JTK11 Tyro7 UFO	protein-coding	19q13.2	AXL receptor tyrosine kinase ||| Tyrosine-protein kinase receptor UFO	26.9603	27.3599	27.2228	27.3893	27.5095	27.6748	22.3067	22.6336	22.4346	22.5242	22.5728	22.4996	21.9349		21.9483	22.0651	21.9613	22.0889	27.1601	27.306	27.5922	22.4701	22.4794	22.5362	21.9349	22.0067	22.0251	27.3528	22.4952	21.9889	-4.85752
ph_Q06418:685	Q06418	0	0	0	3.07762e-07	2	0.96241	1;2	0.956497	KIY(0.999)S(0.04)GDY(0.956)Y(0.005)R	685	Y	10461 7301	MERTK TYRO3	MER RP38 Tyro12 c-Eyk c-mer BYK Dtk Etk-2 RSE Rek Sky Tif	protein-coding	2q13!15q15.1	MER proto-oncogene, tyrosine kinase ||| Tyrosine-protein kinase Mer ||| TYRO3 protein tyrosine kinase ||| Tyrosine-protein kinase receptor TYRO3	21.075	20.5946	22.2274	20.9132	20.8185	22.2896	17.3689	17.709	17.9629	18.1291		17.8495	17.6272	17.2481	16.4015	17.6038	17.4145	17.4207	20.8348	21.5703	21.554	17.5389	18.046	17.8495	17.4376	17.0026	17.4176	21.3197	17.8115	17.286	-3.5082
ph_P30530:703	P30530	0	0	0	2.71667e-67	2	0.09506	1;2	0.999999	IYNGDY(1)Y(1)RQGR	703	Y	558	AXL	ARK JTK11 Tyro7 UFO	protein-coding	19q13.2	AXL receptor tyrosine kinase ||| Tyrosine-protein kinase receptor UFO	23.5294	23.6917	23.9589	23.9861	24.013	24.0921	19.0337	20.6432	20.6545	19.0152	20.6086	20.5954	18.6916	22.0547	19.1041	19.4321	18.6325	19.4491	23.6106	23.9725	24.0525	19.8384	19.8349	20.602	20.3732	19.2681	19.0408	23.8785	20.0918	19.5607	-3.78677
ph_O60716:96	O60716	0	0	0	2.1492e-177	3	-0.10533	1	0.798248	LNGPQDHS(0.001)HLLY(0.798)S(0.167)T(0.034)IPR	96	Y	1500 100528016	CTNND1 TMX2-CTNND1	BCDS2 CAS CTNND P120CAS P120CTN p120 p120(CAS) p120(CTN) CTNND1 p120(cas) p120(ctn)	protein-coding|ncRNA	11q12.1	catenin delta 1 ||| TMX2-CTNND1 readthrough (NMD candidate) ||| Catenin delta-1	24.4833	24.5711	24.9034	24.3025	24.4313	24.2913	22.8312	22.9378	22.9407	22.9714	22.9658	22.6984	22.663	22.4164	22.447	22.3866	22.7572	22.3895	24.5272	24.6029	24.3613	22.8845	22.9561	22.8321	22.5397	22.4168	22.5734	24.4971	22.8909	22.51	-1.60626
ph_Q09666:5841	Q09666	0	0	0	9.39554e-150	3	0.19948	2	0.982259	S(0.023)KGHY(0.974)EVT(0.021)GS(0.982)DDETGKLQGSGVSLASK	5841	S	79026	AHNAK	AHNAKRS PM227	protein-coding	11q12.3	AHNAK nucleoprotein ||| Neuroblast differentiation-associated protein AHNAK	23.3238	23.3168	23.9552	23.0184	23.6639	23.2163		20.2779			20.5494	19.3293	20.4745	20.4845	20.4837		20.282	20.3392	23.3203	23.4868	23.4401	20.2779	NA	19.9394	20.4795	20.4837	20.3106	23.4157	20.1087	20.4246	-3.30709
ph_O43491:623	O43491	0	0	0	0	2	0.13218	1;2	1	VEGDNIY(1)VR	623	Y	2037	EPB41L2	4.1-G 4.1G	protein-coding	6q23.1-q23.2	erythrocyte membrane protein band 4.1 like 2 ||| Band 4.1-like protein 2	26.3764	26.6024	26.9206	26.6146	26.4613	26.3984	25.2004	25.2583	25.0747	25.1199	24.7532	25.0277	24.6829	24.7751	24.3939	24.4093	24.4612	24.2345	26.4894	26.7676	26.4298	25.2294	25.0973	24.8905	24.729	24.4016	24.3479	26.5623	25.0724	24.4928	-1.48989
ph_Q06124:584	Q06124	0	0	0	5.61747e-257	3	2.5539	1;2	1	VY(1)ENVGLMQQQKS(1)FR	584	Y	5781	PTPN11	BPTP3 CFC JMML METCDS NS1 PTP-1D PTP2C SH-PTP2 SH-PTP3 SHP2	protein-coding	12q24.13	protein tyrosine phosphatase non-receptor type 11 ||| Tyrosine-protein phosphatase non-receptor type 11	23.3311	23.2977	23.6544	23.6268	23.1374	23.0201	21.844	21.7186	22.1341	21.7516	21.4316	21.4103	21.3944	20.9817	21.391	21.1928	20.9909	20.8374	23.3144	23.6406	23.0788	21.7813	21.9429	21.4209	21.1881	21.2919	20.9142	23.3446	21.715	21.1314	-1.62956
ph_P25116:420	P25116	0	0	0	1.9542e-43	2	-0.2398	1;2	1	MDTCSSNLNNS(1)IY(1)KK	420	Y	2149	F2R	CF2R HTR PAR-1 PAR1 TR	protein-coding	5q13.3	coagulation factor II thrombin receptor ||| Proteinase-activated receptor 1	22.5491	22.6194	22.9716	21.641	22.8671	21.4579	21.4518	19.7799	21.7969	20.4097	20.183	20.0219	20.5429	19.4746	20.0255	20.3949	20.13	19.6392	22.5842	22.3063	22.1625	20.6159	21.1033	20.1025	20.0088	20.2102	19.8846	22.351	20.6072	20.0345	-1.7438
ph_Q03135:14	Q03135	0	0	0	4.37529e-232	3	0.19606	1	0.998634	YVDSEGHLY(0.999)T(0.001)VPIREQGNIYKPNNK	14	Y	857	CAV1	BSCL3 CGL3 LCCNS MSTP085 PPH3 VIP21	protein-coding	7q31.2	caveolin 1 ||| Caveolin-1	22.9438	22.8695	23.332	23.0019	23.772	23.4403	20.6628	20.2742	21.2413	20.7881	20.7314	20.6761	20.9546		21.0752	20.9835	20.6327	20.5187	22.9066	23.1669	23.6062	20.4685	21.0147	20.7037	20.9546	21.0293	20.5757	23.2266	20.729	20.8532	-2.49759
ph_P22681:674	P22681	0	0	0	4.65581e-36	3	-0.20082	1	0.778514	IKPSSSANAIY(0.779)S(0.221)LAARPLPVPK	674	Y	867	CBL	C-CBL CBL2 FRA11B NSLL RNF55	protein-coding	11q23.3	Cbl proto-oncogene ||| E3 ubiquitin-protein ligase CBL	22.8228	22.2245	22.515	22.1361	21.6535		19.9426	19.5101	19.8696	19.6997		19.4404		19.5954	19.7131		19.2552	19.3927	22.5236	22.3255	21.6535	19.7263	19.7847	19.4404	19.5954	19.7131	19.324	22.1676	19.6505	19.5441	-2.51708
ph_O60716:228	O60716	0	0	0	0	3	0.21407	1;2	0.998653	HYEDGYPGGSDNY(0.999)GS(0.001)LSR	228	Y	1500 100528016	CTNND1 TMX2-CTNND1	BCDS2 CAS CTNND P120CAS P120CTN p120 p120(CAS) p120(CTN) CTNND1 p120(cas) p120(ctn)	protein-coding|ncRNA	11q12.1	catenin delta 1 ||| TMX2-CTNND1 readthrough (NMD candidate) ||| Catenin delta-1	25.6037	25.5862	25.9335	25.9595	25.6115	25.5569	24.6322	24.4598	24.5916	24.5222	24.0846	24.2686	23.9803	24.2413	23.9526	23.7724	24.0822	23.7156	25.5949	25.9465	25.5842	24.546	24.5569	24.1766	24.1108	23.8625	23.8989	25.7085	24.4265	23.9574	-1.28203
ph_O60716:248	O60716	0	0	0	4.38482e-06	2	0.092965	1	0.999994	YRPSMEGY(1)R	248	Y	1500 100528016	CTNND1 TMX2-CTNND1	BCDS2 CAS CTNND P120CAS P120CTN p120 p120(CAS) p120(CTN) CTNND1 p120(cas) p120(ctn)	protein-coding|ncRNA	11q12.1	catenin delta 1 ||| TMX2-CTNND1 readthrough (NMD candidate) ||| Catenin delta-1	21.3363		21.6892	21.6488	21.196	21.2546	20.1398	20.3111			20.0971	19.8891	19.3529	19.6442	19.6272	19.8291		19.5831	21.3363	21.669	21.2253	20.2254	NA	19.9931	19.4985	19.7282	19.5831	21.4102	20.1093	19.6033	-1.3009
ph_Q96D31:300	Q96D31	0	0	0	7.71793e-37	2	0.37576	1	0.999878	GDHPLTPGSHY(1)A	300	Y	84876	ORAI1	CRACM1 IMD9 ORAT1 TAM2 TMEM142A	protein-coding	12q24.31	ORAI calcium release-activated calcium modulator 1 ||| Calcium release-activated calcium channel protein 1			23.2005		22.8939				20.9778	21.1807	21.0727	21.1701	20.4612	20.64	20.6245	20.7851	20.7699	20.5632	NA	23.2005	22.8939	NA	21.0793	21.1214	20.5506	20.7048	20.6666	23.0472	21.1003	20.6407	-1.94692
ph_Q12965:7	Q12965	0	0	0	2.80269e-12	2	0.15384	1	0.997013	GVY(0.997)QY(0.003)HWQSHNVK	7	Y	4643	MYO1E	FSGS6 HuncM-IC MYO1C	protein-coding	15q22.2	myosin IE ||| Unconventional myosin-Ie	22.8971	22.9687	23.2774	23.0279	22.4756	22.3082	21.29	21.261	21.538	21.6651	20.6389	20.8742	20.976	21.0748	21.1131	21.042	20.4796	20.1647	22.9329	23.1526	22.3919	21.2755	21.6016	20.7565	21.0254	21.0776	20.3221	22.8258	21.2112	20.8084	-1.61462
ph_Q96HC4:251	Q96HC4	0	0	0	2.2625e-55	2	0.024228	1	0.999981	YTEFY(1)HVPTHSDASK	251	Y	10611	PDLIM5	ENH ENH1 L9 LIM	protein-coding	4q22.3	PDZ and LIM domain 5 ||| PDZ and LIM domain protein 5	21.0046	20.7982	21.3797	20.9868	21.059		19.9925	19.615		19.8362	19.782	19.3729	19.4323	19.7056	19.333	19.0325	19.938	19.5104	20.9014	21.1833	21.059	19.8037	19.8362	19.5775	19.569	19.1827	19.7242	21.0479	19.7391	19.492	-1.30877
ph_O60716:230	O60716	0	0	0	0	2	0.012549	1;2	0.988663	HYEDGYPGGS(0.006)DNYGS(0.989)LS(0.005)R	230	S	1500 100528016	CTNND1 TMX2-CTNND1	BCDS2 CAS CTNND P120CAS P120CTN p120 p120(CAS) p120(CTN) CTNND1 p120(cas) p120(ctn)	protein-coding|ncRNA	11q12.1	catenin delta 1 ||| TMX2-CTNND1 readthrough (NMD candidate) ||| Catenin delta-1	25.1709		25.8166	25.3784	25.2855	24.9011	21.419	21.1622	19.9236	23.9903	23.9098	23.4955	23.6885	20.128		23.183	19.5751	23.073	25.1709	25.5975	25.0933	21.2906	21.9569	23.7026	21.9083	23.183	21.3241	25.2872	22.3167	22.1384	-2.97051
ph_Q9NUE0:19	Q9NUE0	0	0	0	5.58263e-07	3	0.11686	2	0.99949	MKDCEY(0.996)QQIS(0.005)PGAAPLPAS(0.999)PGAR	19	S	84243	ZDHHC18	DHHC-18 DHHC18	protein-coding	1p36.11	zinc finger DHHC-type palmitoyltransferase 18 ||| Palmitoyltransferase ZDHHC18	20.9096		21.0038	20.7938		20.5552	19.6264	19.5608	19.6523	19.5271	19.4871		19.5092		19.1604	19.2895	19.3187	18.9038	20.9096	20.8988	20.5552	19.5936	19.5897	19.4871	19.5092	19.2249	19.1113	20.7879	19.5568	19.2818	-1.23107
ph_O60716:304	O60716	0	0	0	5.22302e-12	3	-0.12671	1	0.534368	SMGYDDLDYGMMS(0.012)DY(0.454)GT(0.534)ARR	304	T	1500 100528016	CTNND1 TMX2-CTNND1	BCDS2 CAS CTNND P120CAS P120CTN p120 p120(CAS) p120(CTN) CTNND1 p120(cas) p120(ctn)	protein-coding|ncRNA	11q12.1	catenin delta 1 ||| TMX2-CTNND1 readthrough (NMD candidate) ||| Catenin delta-1		20.3533	20.1045	20.3967	19.8401	19.3888	18.1556	18.4604	18.065	18.427	17.7126	18.289	17.8348	18.4143	18.0613	17.8398	17.5841	18.5014	20.3533	20.2506	19.6144	18.308	18.246	18.0008	18.1246	17.9505	18.0427	20.0728	18.1849	18.0393	-1.88784
ph_Q96RT1:1042	Q96RT1	0	0	0	2.49137e-45	2	1.0851	1	1	ANTAY(1)HLHQR	1042	Y	55914	ERBIN	ERBB2IP HEL-S-78 LAP2	protein-coding	5q12.3	erbb2 interacting protein ||| Erbin	21.2991	22.3191	22.3495	22.3473	22.1995	22.2618	20.9724	21.3438	20.9486	20.7416	20.9788	20.6968	20.7496	20.7989	20.6238	20.0488	20.8716	20.3198	21.8091	22.3484	22.2307	21.1581	20.8451	20.8378	20.7743	20.3363	20.5957	22.1294	20.947	20.5688	-1.1824
ph_Q09666:715	Q09666	0	0	0	5.35611e-08	2	0.014198	1	0.999952	VKGEY(1)DVTVPK	715	Y	79026	AHNAK	AHNAKRS PM227	protein-coding	11q12.3	AHNAK nucleoprotein ||| Neuroblast differentiation-associated protein AHNAK	21.6428	21.7518	22.266	22.0045	22.0732	22.0477	20.7356					20.5159	20.5258	20.5182			20.5048	20.2371	21.6973	22.1353	22.0605	20.7356	NA	20.5159	20.522	NA	20.371	21.9644	20.6257	20.4465	-1.33865
ph_P11171:660	P11171	0	0	0	0	2	-0.41084	1	1	LDGENIY(1)IR	660	Y	2035	EPB41	4.1R EL1 HE	protein-coding	1p35.3	erythrocyte membrane protein band 4.1 ||| Protein 4.1	23.5825	23.6251	23.8973	23.9277	23.5094	23.8179	22.6779	22.7251	22.8131	22.9513	22.4942	22.8051	22.3222	22.9614	22.3158	22.3447	22.5887	22.6166	23.6038	23.9125	23.6637	22.7015	22.8822	22.6496	22.6418	22.3302	22.6026	23.7266	22.7444	22.5249	-0.98221
ph_Q9C0B5:529	Q9C0B5	0	0	0	6.03591e-47	3	-0.47179	1;2	0.999537	LVPTGPT(0.001)HREPS(1)PVRY(0.426)DNLS(0.574)R	529	S	25921	ZDHHC5	DHHC5 ZNF375	protein-coding	11q12.1	zinc finger DHHC-type palmitoyltransferase 5 ||| Palmitoyltransferase ZDHHC5	25.9544	26.2029	26.2286	25.8135	25.9101	25.7536	25.118	24.7097	25.215	24.8814	25.48	25.0168	25.1958	24.7834	24.9706	24.6154	24.6789		26.0786	26.021	25.8318	24.9138	25.0482	25.2484	24.9896	24.793	24.6789	25.9772	25.0702	24.8205	-0.907007
ph_P05556:795	P05556	0	0	0	2.47859e-131	2	-1.9929	1	1	SAVTTVVNPKY(1)EGK	795	Y	3688	ITGB1	CD29 FNRB GPIIA MDF2 MSK12 VLA-BETA VLAB	protein-coding	10p11.22	integrin subunit beta 1 ||| Integrin beta-1	22.267	22.3715	22.1579	22.3419	21.9408	22.2486	21.1811		21.1638	21.4215	20.8851	21.126	20.9864	21.3147	21.1488	21.0775	20.81	20.7907	22.3192	22.2499	22.0947	21.1811	21.2926	21.0056	21.1505	21.1131	20.8003	22.2213	21.1598	21.0213	-1.06151
ph_Q9GZY6:136	Q9GZY6	0	0	0	8.46568e-37	3	-0.24858	1	0.992625	FSKPPEDDDANS(0.007)Y(0.993)ENVLICK	136	Y	7462	LAT2	HSPC046 LAB NTAL WBSCR15 WBSCR5 WSCR5	protein-coding	7q11.23	linker for activation of T cells family member 2 ||| Linker for activation of T-cells family member 2	23.7921	24.133	24.198	24.3953	23.9016	23.6474	23.0428	23.3548	23.2424	22.9814	22.722	22.9222	22.9427	22.9241	22.6446	22.6366	22.4225	22.0938	23.9625	24.2966	23.7745	23.1988	23.1119	22.8221	22.9334	22.6406	22.2581	24.0112	23.0443	22.6107	-0.966947
ph_Q8TCZ2:243	Q8TCZ2	0	0	0	4.40167e-52	3	0.61633	1	0.836296	Y(0.836)S(0.139)T(0.024)LHT(0.001)QSAEPPPPPEPARI	243	Y	83692	CD99L2	CD99B MIC2L1	protein-coding	Xq28	CD99 molecule like 2 ||| CD99 antigen-like protein 2	22.9491	22.6904	23.2951	22.7463	23.1137	22.7655	21.7125	21.4317	21.9093	21.5149	22.0231	21.7632	21.5486		21.6664	21.3756	22.138	21.6832	22.8197	23.0207	22.9396	21.5721	21.7121	21.8931	21.5486	21.521	21.9106	22.9267	21.7258	21.6601	-1.20091
ph_Q14247:154	Q14247	0	0	0	2.3235e-09	2	0.2139	1	0.780662	HAS(0.002)QKDY(0.781)S(0.059)S(0.158)GFGGK	154	Y	2017	CTTN	EMS1	protein-coding	11q13.3	cortactin ||| Src substrate cortactin	21.2899	21.3658	21.949				19.8824				19.7965	19.6279	19.3855	19.1789	19.8804	19.7281	19.599	18.8474	21.3278	21.949	NA	19.8824	NA	19.7122	19.2822	19.8042	19.2232	21.6384	19.7973	19.4365	-1.84117
ph_Q9UHR4:274	Q9UHR4	0	0	0	3.5186e-145	2	0.2982	1;2	0.999983	SNVVRKDY(1)DTLSK	274	Y	55971	BAIAP2L1	IRTKS	protein-coding	7q21.3-q22.1	BAR/IMD domain containing adaptor protein 2 like 1 ||| Brain-specific angiogenesis inhibitor 1-associated protein 2-like protein 1	24.9196	25.2419	25.1782	25.3834	24.9197	25.0894	24.1054	24.3121	23.9357	23.7648	23.8686	24.0848	23.9646	24.2002	23.8652	23.9829	23.6532	23.2918	25.0808	25.2808	25.0045	24.2087	23.8502	23.9767	24.0824	23.9241	23.4725	25.122	24.0119	23.8263	-1.11014
ph_P20020:1167	P20020	0	0	0	5.15346e-70	2	-1.4684	1	0.999998	SSLY(1)EGLEKPESR	1167	Y	490 491	ATP2B1 ATP2B2	PMCA1 PMCA1kb PMCA2 PMCA2a PMCA2i	protein-coding	12q21.33!3p25.3	ATPase plasma membrane Ca2+ transporting 1 ||| Plasma membrane calcium-transporting ATPase 1 ||| ATPase plasma membrane Ca2+ transporting 2 ||| Plasma membrane calcium-transporting ATPase 2	22.0533	22.0869	22.446	21.8836	22.1271	21.9944	20.8617	20.5156	20.697	20.4359	20.1728		20.4488				19.9285		22.0701	22.1648	22.0608	20.6886	20.5665	20.1728	20.4488	NA	19.9285	22.0986	20.476	20.1886	-1.62259
ph_Q12965:989	Q12965	0	0	0	2.25878e-104	2	-0.18438	1	0.999597	SLY(1)TSMARPPLPR	989	Y	4643	MYO1E	FSGS6 HuncM-IC MYO1C	protein-coding	15q22.2	myosin IE ||| Unconventional myosin-Ie	20.3999	20.6312	20.8117	20.6102	20.177	19.8494		19.2113	19.7237	19.5157	19.1414			19.1053				18.6975	20.5155	20.711	20.0132	19.2113	19.6197	19.1414	19.1053	NA	18.6975	20.4132	19.3241	18.9014	-1.08911
ph_Q99704:449	Q99704	0	0	0	4.39305e-281	2	0.21674	1	0.999876	SHNSALY(1)SQVQK	449	Y	1796	DOK1	P62DOK pp62	protein-coding	2p13.1	docking protein 1	22.2418	22.2712	22.733	22.1302	22.225	21.885	21.0913	20.4114	21.3404			20.6991	21.0605		20.9692			20.3307	22.2565	22.4316	22.055	20.7513	21.3404	20.6991	21.0605	20.9692	20.3307	22.2477	20.9303	20.7868	-1.31745
ph_Q9UHR4:281	Q9UHR4	0	0	0	1.36461e-05	2	-0.022046	2	0.991813	KDY(0.85)DT(0.134)LS(0.025)KCS(0.992)PK	281	S	55971	BAIAP2L1	IRTKS	protein-coding	7q21.3-q22.1	BAR/IMD domain containing adaptor protein 2 like 1 ||| Brain-specific angiogenesis inhibitor 1-associated protein 2-like protein 1		21.0947	21.7258	21.226	21.0542			20.4952				20.0059	19.9148	19.4383	20.0846	20.0363	19.6258	19.1304	21.0947	21.4759	21.0542	20.4952	NA	20.0059	19.6765	20.0605	19.3781	21.2083	20.2506	19.705	-0.957697
ph_Q12929:485	Q12929	0	0	0	6.92472e-136	3	-0.67574	1	0.999034	LSTEHSSVS(0.001)EY(0.999)HPADGYAFSSNIYTR	485	Y	2059	EPS8	DFNB102	protein-coding	12p12.3	epidermal growth factor receptor pathway substrate 8 ||| Epidermal growth factor receptor kinase substrate 8	23.0376		23.454	23.1062	23.26	22.5382	22.22	22.0505	22.4377	21.6475	22.1462	21.8933	22.1984		21.542		21.6928	21.1068	23.0376	23.2801	22.8991	22.1353	22.0426	22.0198	22.1984	21.542	21.3998	23.0723	22.0659	21.7134	-1.00639
ph_Q16625:368	Q16625	0	0	0	7.90961e-22	2	-0.78555	1	0.997774	Y(0.998)S(0.002)SGGNFETPSK	368	Y	100506658	OCLN	BLCPMG PPP1R115 PTORCH1	protein-coding	5q13.2	occludin	20.1516	20.1199	20.6975	20.2691	20.5069		19.6147	19.1991	19.6855	19.689	19.5681	19.5869	19.0764	19.1359	19.5614	19.1992	19.468		20.1357	20.4833	20.5069	19.4069	19.6872	19.5775	19.1062	19.3803	19.468	20.3753	19.5572	19.3181	-0.818096
ph_Q99569:465	Q99569	0	0	0	0.0031802	2	0.53983	1	0.860957	STLT(0.139)Y(0.861)QR	465	Y	8502	PKP4	p0071	protein-coding	2q24.1	plakophilin 4 ||| Plakophilin-4	19.5798		19.8556			19.4946	18.8703	18.996	18.7114	18.6106	18.8024	18.4124	18.2391	19.206	18.3999		18.6421	18.7552	19.5798	19.8556	19.4946	18.9331	18.661	18.6074	18.7225	18.3999	18.6987	19.6433	18.7338	18.607	-0.909507
ph_Q9Y446:176	Q9Y446	0	0	0	7.27061e-16	2	-1.7323	1	0.998006	ADY(0.998)DT(0.002)LSLR	176	Y	11187	PKP3	---	protein-coding	11p15.5	plakophilin 3 ||| Plakophilin-3		21.0503	21.2459		20.6147			19.8547	19.8472	19.8528	20.005	19.92	19.8493			19.8016	19.3439		21.0503	21.2459	20.6147	19.8547	19.85	19.9625	19.8493	19.8016	19.3439	20.9703	19.8891	19.6649	-1.08122
ph_P54792:346	P54792	0	0	0	0.00350276	2	-0.10387	1	0.88938	S(0.111)Y(0.889)FTVPR	346	Y	1855	DVL1	DRS2 DVL DVL1L1 DVL1P1	protein-coding	1p36.33	dishevelled segment polarity protein 1 ||| Putative segment polarity protein dishevelled homolog DVL1P1 ||| Segment polarity protein dishevelled homolog DVL-1	18.6783	19.4347	19.2979	19.4595	19.0718	18.9442	18.5057	18.7934	18.4483	18.5498	18.5559	18.8884	18.0064	18.2033			18.182	18.2565	19.0565	19.3787	19.008	18.6495	18.4991	18.7222	18.1049	NA	18.2193	19.1477	18.6236	18.1621	-0.524127
ph_Q7Z698:251	Q7Z698	0	0	0	9.12351e-12	3	0.26847	1	0.778987	GKYPDPSEDADS(0.042)S(0.179)Y(0.779)VR	251	Y	200734	SPRED2	Spred-2	protein-coding	2p14	sprouty related EVH1 domain containing 2 ||| Sprouty-related, EVH1 domain-containing protein 2	21.1886	21.2768	21.6681	21.4107						20.5787	20.3255	20.1403	19.7749	19.8629	19.719	19.7859	20.123	19.6722	21.2327	21.5394	NA	NA	20.5787	20.2329	19.8189	19.7525	19.8976	21.3861	20.4058	19.823	-0.980262
ph_Q99569:494	Q99569	0	0	0	0.00121746	2	0.072516	1	1	VQECNY(1)NR	494	Y	8502	PKP4	p0071	protein-coding	2q24.1	plakophilin 4 ||| Plakophilin-4		21.3121	20.8229	21.4347	20.6972	21.4804				17.1375	19.6995				18.6556		18.5542	17.7494	21.3121	21.1288	21.0888	NA	17.1375	19.6995	NA	18.6556	18.1518	21.1766	18.4185	18.4037	-2.75811
ph_P05783:13	P05783	0	0	0	1.46851e-63	2	0.12146	1	0.999999	STFSTNY(1)R	13	Y	3875	KRT18	CK-18 CYK18 K18	protein-coding	12q13.13	keratin 18 ||| Keratin, type I cytoskeletal 18	22.8911	23.4006	23.7093	23.7783	23.3422	23.5622	22.5109	22.6751	22.416	22.5573	22.6281	22.7641	21.9496	22.2532	22.1848	22.3373	22.5696	22.5796	23.1459	23.7438	23.4522	22.593	22.4867	22.6961	22.1014	22.2611	22.5746	23.4473	22.5919	22.3123	-0.855363
ph_Q99569:372	Q99569	0	0	0	2.18906e-28	3	-0.40078	1	0.999895	TVHDMEQFGQQQYDIY(1)ER	372	Y	8502	PKP4	p0071	protein-coding	2q24.1	plakophilin 4 ||| Plakophilin-4	22.2048	22.5348	22.0853	22.4871	22.0554	21.9049	21.1011	21.124	21.4082	21.1526	20.874	21.1089	21.5068	21.5837	20.8085	20.9904	20.6639		22.3698	22.2862	21.9801	21.1125	21.2804	20.9914	21.5453	20.8995	20.6639	22.212	21.1281	21.0362	-1.08393
ph_P20936:460	P20936	0	0	0	0.00261275	2	-0.028984	1	0.99996	EIY(1)NTIR	460	Y	5921	RASA1	CM-AVM CMAVM CMAVM1 GAP PKWS RASA RASGAP p120 p120GAP p120RASGAP	protein-coding	5q14.3	RAS p21 protein activator 1 ||| Ras GTPase-activating protein 1	20.6033	20.5318	20.8085	20.7967	20.2031			19.7106	19.6683	19.6691	19.1025	19.1783	19.5527	19.8634	19.18	19.3622	18.9094	19.0448	20.5675	20.8026	20.2031	19.7106	19.6687	19.1404	19.708	19.2711	18.9771	20.5244	19.5066	19.3187	-1.01785
ph_Q07157:1066	Q07157	0	0	0	2.45663e-15	2	-0.87124	1	0.747939	Y(0.002)ES(0.035)S(0.035)S(0.144)Y(0.748)T(0.035)DQFS(0.001)R	1066	Y	7082	TJP1	ZO-1	protein-coding	15q13.1	tight junction protein 1 ||| Tight junction protein ZO-1	19.4262	19.7044	20.6645	20.4172	20.1402	19.6787				19.1066	18.9631	19.4183	18.6557			18.598	19.1144	18.7414	19.5653	20.5409	19.9095	NA	19.1066	19.1907	18.6557	18.598	18.9279	20.0052	19.1486	18.7272	-0.856564
ph_Q5R3F8:502	Q5R3F8	0	0	0	0.000600508	2	-2.4899	1	1	GNY(1)IEVR	502	Y	114794	ELFN2	LRRC62 PPP1R29	protein-coding	22q13.1	extracellular leucine rich repeat and fibronectin type III domain containing 2 ||| Protein phosphatase 1 regulatory subunit 29	18.6683	19.3524		19.5443		19.4406	18.2167		18.4461	18.5183	18.6065		18.326		18.3551		18.1334		19.0103	19.5443	19.4406	18.2167	18.4822	18.6065	18.326	18.3551	18.1334	19.3317	18.4351	18.2715	-0.89661
ph_Q9H0W8:41	Q9H0W8	0	0	0	0.0006905	2	1.9079	1	1	ERDY(1)IAPWER	41	Y	56006	SMG9	C19orf61 F17127_1 HBMS	protein-coding	19q13.31	SMG9 nonsense mediated mRNA decay factor ||| Protein SMG9	19.0256		19.6131			19.0646	18.6367	18.7681		18.8053	18.063	18.0503	18.3837			18.0454	17.6816		19.0256	19.6131	19.0646	18.7024	18.8053	18.0567	18.3837	18.0454	17.6816	19.2344	18.5215	18.0369	-0.712979
ph_P00533:1197	P00533	0	0	0	3.34585e-106	2	0.18629	1	1	GSTAENAEY(1)LR	1197	Y	1956	EGFR	ERBB ERBB1 HER1 NISBD2 PIG61 mENA	protein-coding	7p11.2	epidermal growth factor receptor	24.9027	24.706	24.8398	24.5604	24.3545	24.5107	23.695	23.548	23.5357	23.1348	23.441	23.4781	23.9166	23.9061	23.6079	23.434	23.6022	23.6379	24.8044	24.7001	24.4326	23.6215	23.3353	23.4596	23.9113	23.521	23.62	24.6457	23.4721	23.6841	-1.17358
ph_Q8IVF2:4795	Q8IVF2	0	0	0	0.00472975	2	0.054488	1	0.999435	Y(0.999)QVT(0.001)VPR	4795	Y	113146	AHNAK2	C14orf78	protein-coding	14q32.33	AHNAK nucleoprotein 2 ||| Protein AHNAK2	20.0643	20.4158	20.6433			20.4062	19.4947	19.4435		19.9961	19.6011	19.3611	19.4165	19.6148	19.5518	19.4754	19.2575	19.3463	20.24	20.6433	20.4062	19.4691	19.9961	19.4811	19.5157	19.5136	19.3019	20.4298	19.6488	19.4437	-0.781082
ph_Q9Y6M7:44	Q9Y6M7	0	0	0	4.80686e-06	2	0.18609	1	1	AVY(1)IGVHVPFSK	44	Y	9497	SLC4A7	NBC2 NBC3 NBCN1 SBC2 SLC4A6	protein-coding	3p24.1	solute carrier family 4 member 7 ||| Sodium bicarbonate cotransporter 3		19.4283	19.9018	19.9172	19.5312		18.18	18.5311				18.6555	18.7902	18.7612	18.9191	18.1283	18.2811	18.3578	19.4283	19.9095	19.5312	18.3556	NA	18.6555	18.7757	18.5237	18.3194	19.623	18.5055	18.5396	-1.11745
ph_Q13671:36	Q13671	0	0	0	3.40113e-214	3	-0.033456	1	1	EKPAQDPLY(1)DVPNASGGQAGGPQRPGR	36	Y	9610	RIN1	---	protein-coding	11q13.2	Ras and Rab interactor 1	24.4788	24.2198	24.5392	23.9525	24.0331	23.8619	23.5998	23.3364	23.5067	23.2373	23.383	23.3219	23.6135	23.1654	23.3564	23.2775	22.9093	22.8758	24.3493	24.2458	23.9475	23.4681	23.372	23.3524	23.3895	23.3169	22.8925	24.1809	23.3975	23.1997	-0.783367
ph_Q9C0B5;Q9ULC8:711;761	Q9C0B5;Q9ULC8	0	0	0	6.80865e-05	2	-0.29582	1	0.984034	KVS(0.001)GVGGT(0.003)T(0.011)Y(0.984)EIS(0.001)V	711;761	Y	25921 29801	ZDHHC5 ZDHHC8	DHHC5 ZNF375 DHHC8 ZDHHCL1 ZNF378	protein-coding	11q12.1!22q11.21	zinc finger DHHC-type palmitoyltransferase 5 ||| Palmitoyltransferase ZDHHC5 ||| zinc finger DHHC-type palmitoyltransferase 8 ||| Probable palmitoyltransferase ZDHHC8	20.0566		20.338		20.3061		19.5562	19.6868	19.3291		19.3732	19.5605	19.432	19.5845	19.258	19.0487	19.5442	19.4635	20.0566	20.338	20.3061	19.6215	19.3291	19.4668	19.5082	19.1534	19.5038	20.2335	19.4725	19.3885	-0.761033
ph_P63220:53	P63220	0	0	0	0.00312728	2	-0.22375	---	0.871102	T(0.129)Y(0.871)AICGAIR	53	Y	6227	RPS21	HLDF S21	protein-coding	20q13.33	ribosomal protein S21 ||| 40S ribosomal protein S21	18.8674	19.3625	19.3754	19.4549		19.229	18.6319		18.8278	18.6228	18.22			18.1639	18.3523	18.39			19.115	19.4152	19.229	18.6319	18.7253	18.22	18.1639	18.3711	NA	19.2531	18.5258	18.2675	-0.727297
ph_O15357:886	O15357	0	0	0	1.61925e-131	3	-0.16987	1	1	ERLY(1)EWISIDKDEAGAK	886	Y	3636	INPPL1	OPSMD SHIP2	protein-coding	11q13.4	inositol polyphosphate phosphatase like 1 ||| Phosphatidylinositol 3,4,5-trisphosphate 5-phosphatase 2	22.8046	23.2773	23.4177	23.3252	22.6529	22.7196	21.7175	21.794	21.5789	21.5832	21.4948	21.5195	21.9993	21.9701	21.5998	21.778	21.7943	21.6341	23.041	23.3714	22.6862	21.7558	21.581	21.5071	21.9847	21.6889	21.7142	23.0329	21.6147	21.7959	-1.41823
ph_Q99569:478	Q99569	0	0	0	1.84589e-258	3	-0.43469	1	0.976619	NNYALNTTAT(0.023)Y(0.977)AEPYRPIQYR	478	Y	8502	PKP4	p0071	protein-coding	2q24.1	plakophilin 4 ||| Plakophilin-4	24.4394	24.4735		24.1667	24.476		23.867	23.9271	23.8067	23.4778	23.3023	23.48	23.734	23.4915	23.4274	23.422	23.5384	23.3086	24.4565	24.1667	24.476	23.897	23.6422	23.3912	23.6128	23.4247	23.4235	24.3664	23.6435	23.487	-0.722908
ph_Q99569:420	Q99569	0	0	0	1.27791e-08	2	0.48681	1	0.987316	T(0.013)Y(0.987)YSPVYR	420	Y	8502	PKP4	p0071	protein-coding	2q24.1	plakophilin 4 ||| Plakophilin-4	20.76	21.3614	21.3131	21.792	21.2698	21.6075	20.8323	20.8193	20.6862	20.8476	20.4409	20.8309	20.4223	20.3286	20.2885	20.8513		20.4565	21.0607	21.5526	21.4386	20.8258	20.7669	20.6359	20.3755	20.5699	20.4565	21.3506	20.7429	20.4673	-0.607765
ph_Q9HAU0:436	Q9HAU0	0	0	0	8.88965e-25	2	0.16175	1	0.969024	GVIS(0.026)Y(0.969)QT(0.005)LPR	436	Y	54477	PLEKHA5	PEPP-2 PEPP2	protein-coding	12p12.3	pleckstrin homology domain containing A5 ||| Pleckstrin homology domain-containing family A member 5		21.6515	21.6574	21.5132	21.5667	21.5245	19.911		21.2664	21.1528	20.0092			20.7014		19.6765	19.9868	19.823	21.6515	21.5853	21.5456	19.911	21.2096	20.0092	20.7014	19.6765	19.9049	21.5941	20.3766	20.0943	-1.21751
ph_Q6NZI2:156	Q6NZI2	0	0	0	5.10825e-12	2	-0.40774	1	1	VMIY(1)QDEVKLPAK	156	Y	284119	CAVIN1	CAVIN CGL4 FKSG13 PTRF cavin-1	protein-coding	17q21.2	caveolae associated protein 1 ||| Caveolae-associated protein 1	21.3874	21.5499	21.5552	21.3763	22.0571	21.791	21.0355	21.1321	21.0263	20.8625	21.4071	20.8527	20.7644		20.501	20.5928			21.4687	21.4657	21.924	21.0838	20.9444	21.1299	20.7644	20.5469	NA	21.6195	21.0527	20.6557	-0.566766
ph_Q96PD2:750	Q96PD2	0	0	0	1.80514e-67	3	1.0685	1	1	AGKPGLPAPDELVY(1)QVPQSTQEVSGAGR	750	Y	131566	DCBLD2	CLCP1 ESDN	protein-coding	3q12.1|3	discoidin, CUB and LCCL domain containing 2 ||| Discoidin, CUB and LCCL domain-containing protein 2	22.7132	23.0678	23.1427	23.2323	23.2602	23.2833	22.6336	22.7583	22.6378	22.551	22.8904	22.6333	21.835	21.6196	22.134	22.4336	22.5056	22.2567	22.8905	23.1875	23.2718	22.6959	22.5944	22.7618	21.7273	22.2838	22.3812	23.1166	22.6841	22.1308	-0.432521
ph_P54760:574	P54760	0	0	0	1.67368e-23	2	0.45835	1	0.980557	EAEY(0.981)S(0.019)DKHGQYLIGHGTK	574	Y	2050	EPHB4	CMAVM2 HFASD HTK LMPHM7 MYK1 TYRO11	protein-coding	7q22.1	EPH receptor B4 ||| Ephrin type-B receptor 4	24.3937	24.3912	24.7886	24.2626	23.9828	23.7252	23.8586	23.575	23.939	23.3917	23.4869	23.3829	23.5149	23.433	23.4361	23.1204	23.0882		24.3925	24.5256	23.854	23.7168	23.6653	23.4349	23.4739	23.2783	23.0882	24.2573	23.6057	23.2801	-0.651682
ph_Q15464:114	Q15464	0	0	0	7.51824e-84	2	-0.11877	1	1	LDY(1)CGGSGEPGGVQR	114	Y	6461	SHB	bA3J10.2	protein-coding	9p13.1	SH2 domain containing adaptor protein B ||| SH2 domain-containing adapter protein B	22.7217	22.8672	22.8449	22.8092	22.7816	22.5522	22.2732	22.0862	22.2388	22.1587	22.2283	22.006	22.4126	22.1465	22.1631	21.8449	21.9574	21.7819	22.7945	22.827	22.6669	22.1797	22.1987	22.1172	22.2795	22.004	21.8696	22.7628	22.1652	22.0511	-0.597611
ph_Q16625:342	Q16625	0	0	0	0.00281669	2	0.39006	1	0.837157	FYPES(0.03)S(0.133)Y(0.837)K	342	Y	100506658	OCLN	BLCPMG PPP1R115 PTORCH1	protein-coding	5q13.2	occludin	19.1012	19.6843	19.461	19.8816		19.8232	19.2771	19.2322	19.1405	19.3091	18.6607	19.1621	18.6942	18.4103		19.062	18.6216	18.945	19.3928	19.6713	19.8232	19.2546	19.2248	18.9114	18.5522	19.062	18.7833	19.6291	19.1303	18.7992	-0.49882
ph_Q96PD2:715	Q96PD2	0	0	0	3.1517e-31	3	0.68387	1	0.949298	ATGNQPPPLVGT(0.041)Y(0.949)NT(0.01)LLSR	715	Y	131566	DCBLD2	CLCP1 ESDN	protein-coding	3q12.1|3	discoidin, CUB and LCCL domain containing 2 ||| Discoidin, CUB and LCCL domain-containing protein 2	19.6128	19.5008	19.6462	20.0255			19.2912	19.4729	19.0181			19.5007	17.9743	19.1185	18.7977		19.0356	18.9931	19.5568	19.8359	NA	19.382	19.0181	19.5007	18.5464	18.7977	19.0144	19.6963	19.3003	18.7861	-0.396048
ph_O15049:83	O15049	0	0	0	1.82116e-05	2	0.59536	1	0.941076	NEPADY(0.941)AT(0.05)LY(0.007)Y(0.001)R	83	Y	23138	N4BP3	LZTS4	protein-coding	5q35.3	NEDD4 binding protein 3 ||| NEDD4-binding protein 3		18.8827		19.1673	18.958	18.6417	18.3603	18.4542	18.2097	18.0972	17.7625	18.2976	18.415	18.2345	17.8481	18.0442	18.0892	18.3944	18.8827	19.1673	18.7998	18.4072	18.1535	18.03	18.3248	17.9461	18.2418	18.9499	18.1969	18.1709	-0.753024
ph_P58335:381	P58335	0	0	0	9.57177e-06	2	0.33436	1	0.842266	WPTVDAS(0.027)Y(0.131)Y(0.842)GGR	381	Y	84168 118429	ANTXR1 ANTXR2	ATR GAPO TEM8 CMG-2 CMG2 HFS ISH JHF	protein-coding	2p13.3!4q21.21	ANTXR cell adhesion molecule 1 ||| Anthrax toxin receptor 1 ||| ANTXR cell adhesion molecule 2 ||| Anthrax toxin receptor 2	19.5489		19.6513	19.857	19.9995				19.4227	19.3415	19.0378		19.1746	18.3869			18.9958	18.8243	19.5489	19.7542	19.9995	NA	19.3821	19.0378	18.7808	NA	18.9101	19.7675	19.21	18.8454	-0.557559
ph_Q96CS3:79	Q96CS3	0	0	0	1.60323e-53	2	0.37873	1	0.999969	IY(1)SYVVSRPQPR	79	Y	23197	FAF2	ETEA UBXD8 UBXN3B	protein-coding	5q35.2	Fas associated factor family member 2 ||| FAS-associated factor 2	21.086	21.1415	21.3466	20.7548	20.9133	20.8247	20.3377		20.6412	20.1955	20.5308	20.1082	20.2707	20.3563	20.358	20.3204	20.313		21.1137	21.0507	20.869	20.3377	20.4184	20.3195	20.3135	20.3392	20.313	21.0111	20.3585	20.3219	-0.652607
ph_O14786:920	O14786	0	0	0	1.28345e-05	2	-0.2265	1	0.845268	DKLNT(0.001)QS(0.004)T(0.004)Y(0.845)S(0.146)EA	920	Y	8829	NRP1	BDCA4 CD304 NP1 NRP VEGF165R	protein-coding	10p11.22	neuropilin 1 ||| Neuropilin-1	21.2297		21.37			21.3993	20.8797	20.501	20.8315	21.5961	20.9683	20.7676	20.3124	20.3378	21.144	20.3868		20.4009	21.2297	21.37	21.3993	20.6903	21.2138	20.868	20.3251	20.7654	20.4009	21.333	20.924	20.4971	-0.408979
ph_Q9C0H5:448	Q9C0H5	0	0	0	2.41217e-08	2	0.23156	1	0.998982	S(0.001)GDY(0.999)STMEGPELR	448	Y	80728	ARHGAP39	CrGAP Vilse	protein-coding	8q24.3	Rho GTPase activating protein 39 ||| Rho GTPase-activating protein 39	20.175	20.4263	20.3358	20.0464	20.3001	20.2663	19.8337	19.6399	20.0979	19.8089	19.3461		19.6245		19.3196		19.3889		20.3007	20.1911	20.2832	19.7368	19.9534	19.3461	19.6245	19.3196	19.3889	20.2583	19.6788	19.4443	-0.579548
ph_Q9UQB8:337	Q9UQB8	0	0	0	0.000337349	2	-2.9115	---	0.814584	LS(0.008)DS(0.083)Y(0.815)S(0.083)NT(0.012)LPVRK	337	Y	10458	BAIAP2	BAP2 FLAF3 IRSP53	protein-coding	17q25.3	BAR/IMD domain containing adaptor protein 2 ||| Brain-specific angiogenesis inhibitor 1-associated protein 2	20.5225	20.4967	21.0684	20.5632		19.9981	19.4154		19.9426	19.1897	19.6154	19.0224	19.4347	19.3571	19.5281	19.1025	19.4883	19.4528	20.5096	20.8158	19.9981	19.4154	19.5662	19.3189	19.3959	19.3153	19.4706	20.4411	19.4335	19.3939	-1.00765
ph_Q9NRY4:1105	Q9NRY4	0	0	0	7.33122e-112	3	-0.042644	1	0.983297	NEEENIY(0.983)S(0.017)VPHDSTQGK	1105	Y	2909	ARHGAP35	GRF-1 GRLF1 P190-A P190A p190ARhoGAP p190RhoGAP	protein-coding	19q13.32	Rho GTPase activating protein 35 ||| Rho GTPase-activating protein 35	24.6227	24.6712	24.5768	24.713	24.3943	24.3258	24.4039	24.0624	24.0936	24.1364	24.2504	24.2848	23.9673	24.0401	23.8242	23.9189	24.0756	23.8316	24.6469	24.6449	24.3601	24.2332	24.115	24.2676	24.0037	23.8715	23.9536	24.5506	24.2053	23.9429	-0.345379
ph_Q99959:108	Q99959	0	0	0	1.62814e-05	2	-0.22259	1	0.971102	SPVPKT(0.029)Y(0.971)DMLK	108	Y	5318	PKP2	ARVD9	protein-coding	12p11.21	plakophilin 2 ||| Plakophilin-2	20.8146		21.1539	21.2462	20.7269			20.0166		19.6556		19.3643	20.0743	20.3985		19.0888	20.331		20.8146	21.2001	20.7269	20.0166	19.6556	19.3643	20.2364	19.0888	20.331	20.9139	19.6788	19.8854	-1.23503
ph_P53801:174	P53801	0	0	0	9.94992e-193	2	0.30556	1;2	1	Y(1)GLFKEENPY(1)AR	174	Y	754	PTTG1IP	C21orf1 C21orf3 PBF	protein-coding	21q22.3	PTTG1 interacting protein ||| Pituitary tumor-transforming gene 1 protein-interacting protein	25.1898	25.2447	25.3617	24.5369	25.5398	25.4171	24.3285	24.3714	24.5246	24.5397	24.4155	24.2894	24.7174	24.366	24.3197	24.4296	24.3454	24.5177	25.2173	24.9493	25.4784	24.35	24.5321	24.3525	24.5417	24.3746	24.4316	25.215	24.4115	24.4493	-0.80348
ph_Q9GZY6:40	Q9GZY6	0	0	0	0.000937479	2	0.12218	1	1	SEKIY(1)QQR	40	Y	7462	LAT2	HSPC046 LAB NTAL WBSCR15 WBSCR5 WSCR5	protein-coding	7q11.23	linker for activation of T cells family member 2 ||| Linker for activation of T-cells family member 2	20.904		21.0213	21.2778	20.9652	20.7614	20.1137		19.8745	19.7274	20.0155	19.7621	20.7186	20.7743	20.3258	19.828	19.9612	20.1431	20.904	21.1495	20.8633	20.1137	19.801	19.8888	20.7465	20.0769	20.0521	20.9723	19.9345	20.2918	-1.0378
ph_Q9HAU0:866	Q9HAU0	0	0	0	1.85061e-26	3	0.71101	2	0.949973	AKS(0.651)PT(0.215)PES(0.045)S(0.045)T(0.045)IAS(0.039)Y(0.95)VT(0.011)LRK	866	Y	54477	PLEKHA5	PEPP-2 PEPP2	protein-coding	12p12.3	pleckstrin homology domain containing A5 ||| Pleckstrin homology domain-containing family A member 5	21.1021		21.3761	21.3603	21.1853	21.3975		20.311				19.4469	20.1192		20.2918	20.2932		20.553	21.1021	21.3682	21.2914	20.311	NA	19.4469	20.1192	20.2925	20.553	21.2539	19.879	20.3216	-1.37492
ph_Q9Y624:280	Q9Y624	0	0	0	0.00118476	2	0.59825	1	0.974301	VIY(0.974)S(0.025)QPS(0.001)AR	280	Y	50848	F11R	CD321 JAM JAM1 JAMA JCAM KAT PAM-1	protein-coding	1q23.3	F11 receptor ||| Junctional adhesion molecule A	20.1855		20.2817		20.4318	20.4013	19.8681	20.4077	19.5475		19.5737			19.3206	19.7778	19.87	20.026	19.3565	20.1855	20.2817	20.4166	20.1379	19.5475	19.5737	19.3206	19.8239	19.6912	20.2946	19.753	19.6119	-0.541521
ph_Q8IZP0:213	Q8IZP0	0	0	0	2.81817e-191	3	0.024132	1;2	0.960901	TLEPVKPPTVPNDY(0.961)MT(0.029)S(0.01)PAR	213	Y	10006	ABI1	ABI-1 ABLBP4 E3B1 NAP1BP SSH3BP SSH3BP1	protein-coding	10p12.1	abl interactor 1	24.6064	24.8507	24.7225	24.6232	24.757	24.3429	23.6745	23.8871	24.2602	24.0732	23.9073	24.137	24.295	24.434	23.9127	24.0164	23.7782	23.8549	24.7285	24.6728	24.5499	23.7808	24.1667	24.0221	24.3645	23.9646	23.8166	24.6504	23.9899	24.0486	-0.660551
ph_Q6NZI2:308	Q6NZI2	0	0	0	2.86838e-30	2	0.078758	1	1	SFTPDHVVY(1)AR	308	Y	284119	CAVIN1	CAVIN CGL4 FKSG13 PTRF cavin-1	protein-coding	17q21.2	caveolae associated protein 1 ||| Caveolae-associated protein 1	23.2333	23.3659	23.3759	23.018	23.6509	23.6853	22.5334	22.3503	22.3584	22.3089	22.5895	22.2423	22.7684	22.5408	22.6968	22.69	22.6966	22.4682	23.2996	23.197	23.6681	22.4418	22.3337	22.4159	22.6546	22.6934	22.5824	23.3882	22.3971	22.6435	-0.99109
ph_Q96J84:644	Q96J84	0	0	0	1.89291e-68	2	0.61045	1	0.96287	LS(0.003)HS(0.963)S(0.028)GY(0.006)AQLNTYSR	644	S	55243	KIRREL1	KIRREL NEPH1	protein-coding	1q23.1	kirre like nephrin family adhesion molecule 1 ||| Kin of IRRE-like protein 1			22.3496		22.3947	22.2046		20.3522	22.0055	21.5389	22.1141		21.749		21.6202				NA	22.3496	22.2997	20.3522	21.7722	22.1141	21.749	21.6202	NA	22.3246	21.4129	21.6846	-0.911773
ph_Q99569:415	Q99569	0	0	0	8.21255e-34	2	0.078217	1	0.998587	SAVSPDLHIT(0.001)PIY(0.999)EGR	415	Y	8502	PKP4	p0071	protein-coding	2q24.1	plakophilin 4 ||| Plakophilin-4	21.5049	21.8656	21.6448	21.5982	21.3304	21.1232	20.7691		21.292	20.7964	20.583	20.8131	21.5837	21.1604	20.9851	21.2201		20.6528	21.6853	21.6215	21.2268	20.7691	21.0442	20.698	21.372	21.1026	20.6528	21.5112	20.8371	21.0425	-0.674066
ph_Q05655:313	Q05655	0	0	0	6.23788e-106	3	-0.14698	1;2	1	RSDSASSEPVGIY(1)QGFEKK	313	Y	5580	PRKCD	ALPS3 CVID9 MAY1 PKCD nPKC-delta	protein-coding	3p21.1	protein kinase C delta ||| Protein kinase C delta type	23.2968	23.1448	23.1354	22.5975	23.0304	22.5048	22.3977	22.2873	22.6748	22.0972	22.4681	22.0621	22.7373	22.5414	22.4953	22.3527	22.3739	22.3798	23.2208	22.8664	22.7676	22.3425	22.386	22.2651	22.6393	22.424	22.3768	22.9516	22.3312	22.4801	-0.620402
ph_P07948:32	P07948	0	0	0	4.49198e-27	2	-4.4115	1	0.99984	TIY(1)VRDPTSNK	32	Y	4067	LYN	JTK8 p53Lyn p56Lyn	protein-coding	8q12.1	LYN proto-oncogene, Src family tyrosine kinase ||| Tyrosine-protein kinase Lyn			21.1903	21.2179		21.2916	20.53	20.4985	20.4909		20.435	20.6565	21.3857	20.6459	20.5366	21.5492		20.7357	NA	21.2041	21.2916	20.5142	20.4909	20.5458	21.0158	21.0429	20.7357	21.2479	20.517	20.9315	-0.730882
ph_P38159:335	P38159	0	0	0	0.000527827	2	-0.18834	1	0.993962	SDLY(0.994)S(0.005)S(0.001)GRDR	335	Y	27316	RBMX	HNRNPG HNRPG MRXS11 RBMXP1 RBMXRT RNMX hnRNP-G	protein-coding	Xq26.3	RNA binding motif protein X-linked ||| RNA-binding motif protein, X chromosome	20.5276		20.5223				19.8754				19.9795	19.9012				20.5675		20.1058	20.5276	20.5223	NA	19.8754	NA	19.9404	NA	20.5675	20.1058	20.525	19.9079	20.3367	-0.617078
ph_Q07666:440	Q07666	0	0	0	0.000324259	2	0.95175	1	0.998536	EHPY(0.999)GRY(0.001)	440	Y	10657 202559	KHDRBS1 KHDRBS2	Sam68 p62 p68 SLM-1 SLM1	protein-coding	1p35.2!6q11.1	KH RNA binding domain containing, signal transduction associated 1 ||| KH domain-containing, RNA-binding, signal transduction-associated protein 1 ||| KH RNA binding domain containing, signal transduction associated 2 ||| KH domain-containing, RNA-binding, signal transduction-associated protein 2	21.441	21.7073	21.698		21.5452	21.7943	21.8972	22.2332	22.1023	22.0795	22.3022	22.2795	22.2086	22.522	22.7251	22.8463	22.7923	22.7127	21.5741	21.698	21.6697	22.0652	22.0909	22.2909	22.3653	22.7857	22.7525	21.6473	22.149	22.6345	0.501717
ph_Q13523:849	Q13523	0	0	0	0	2	-0.49655	1;2	0.999928	LCDFGSASHVADNDITPY(1)LVSR	849	Y	8899	PRPF4B	PR4H PRP4 PRP4H PRP4K dJ1013A10.1	protein-coding	6p25.2	pre-mRNA processing factor 4B ||| Serine/threonine-protein kinase PRP4 homolog	28.0803	28.8725	28.4173	28.3137	28.7976	28.6562	28.9655	29.3718	28.7366	28.9382	29.1701	29.0601	29.417	29.1543	29.4062		29.541	29.4671	28.4764	28.3655	28.7269	29.1686	28.8374	29.1151	29.2857	29.4062	29.504	28.5229	29.0404	29.3986	0.51746
ph_P35232:249	P35232	0	0	0	0.000113133	2	0.3336	1	0.927717	KLEAAEDIAY(0.928)QLS(0.072)R	249	Y	5245	PHB	HEL-215 HEL-S-54e PHB1	protein-coding	17q21.33	prohibitin	17.803	18.5633	18.1437	18.2821		18.5652		19.1805	18.756	18.7855	18.5999	19.1074	19.3457	19.2595			19.1131	19.1411	18.1832	18.2129	18.5652	19.1805	18.7708	18.8537	19.3026	NA	19.1271	18.3204	18.935	19.2148	0.614563
ph_P07947:194	P07947	0	0	0	2.64173e-08	3	-0.68157	1	0.952322	ESET(0.001)T(0.001)KGAY(0.952)S(0.043)LS(0.003)IR	194	Y	2268 2534 7525	FGR FYN YES1	SRC2 c-fgr c-src2 p55-Fgr p55c-fgr p58-Fgr p58c-fgr SLK SYN p59-FYN HsT441 P61-YES Yes c-yes	protein-coding	1p35.3!6q21!18p11.32	FGR proto-oncogene, Src family tyrosine kinase ||| Tyrosine-protein kinase Fgr ||| FYN proto-oncogene, Src family tyrosine kinase ||| Tyrosine-protein kinase Fyn ||| YES proto-oncogene 1, Src family tyrosine kinase ||| Tyrosine-protein kinase Yes		20.2577	20.5431	20.0639			20.9393		20.9455	20.7732			21.2383		21.1437			20.9207	20.2577	20.3035	NA	20.9393	20.8593	NA	21.2383	21.1437	20.9207	20.2806	20.8993	21.1009	0.618757
ph_Q05639;Q5VTE0:141;141	Q5VTE0;Q05639	0	0	0	3.86251e-68	2	-0.53418	1	0.998216	EHALLAY(0.998)T(0.002)LGVK	141;141	Y	1915 1917 158078	EEF1A1 EEF1A2 EEF1A1P5	CCS-3 CCS3 EE1A1 EEF-1 EEF1A EF-Tu EF1A GRAF-1EF HNGC:16303 LENG7 PTI1 eEF1A-1 EEF1AL EF-1-alpha-2 EIEE33 HS1 MRD38 STN STNL EEF1AL3	protein-coding|pseudo	6q13!20q13.33!9q34.13	eukaryotic translation elongation factor 1 alpha 1 ||| Elongation factor 1-alpha 1 ||| eukaryotic translation elongation factor 1 alpha 2 ||| Elongation factor 1-alpha 2 ||| eukaryotic translation elongation factor 1 alpha 1 pseudogene 5 ||| Putative elongation factor 1-alpha-like 3	21.1759	21.5086	20.9719	21.3295	21.1032	21.0706	21.4399	21.6605	21.4678	21.6905	21.5231	21.6821	21.8581	21.7486	22.0601	22.1654	21.892	21.865	21.3423	21.1507	21.0869	21.5502	21.5792	21.6026	21.8033	22.1128	21.8785	21.1933	21.5773	21.9315	0.384046
ph_O75815:266	O75815	0	0	0	2.96266e-09	2	-0.41099	1	0.986572	CLEEHY(0.987)GT(0.011)S(0.003)PGQAR	266	Y	8412	BCAR3	AND-34 NSP2 SH2D3B	protein-coding	1p22.1	BCAR3 adaptor protein, NSP family member ||| Breast cancer anti-estrogen resistance protein 3	19.8736	20.1088		19.7956	20.4227	20.0043	20.4596	19.9983	20.5333	20.2238	20.5097		20.9005	20.8165	21.0205	20.6333	20.9364	20.6863	19.9912	19.7956	20.2135	20.2289	20.3785	20.5097	20.8585	20.8269	20.8113	20.0001	20.3724	20.8322	0.37228
ph_Q05397:576	Q05397	0	0	0	9.68429e-84	3	0.23548	1;2	0.982771	YMEDST(0.002)Y(0.983)Y(0.015)KASK	576	Y	5747	PTK2	FADK FAK FAK1 FRNK PPP1R71 p125FAK pp125FAK	protein-coding	8q24.3	protein tyrosine kinase 2 ||| Focal adhesion kinase 1	24.3709	24.4803	24.5519	24.6235	24.9155	24.7321	25.0345	24.9111	24.9812	24.9915	25.303	25.211	25.2554	25.3402	25.5247	25.4578	25.389	25.333	24.4256	24.5877	24.8238	24.9728	24.9863	25.257	25.2978	25.4912	25.361	24.6124	25.072	25.3833	0.459672
ph_P07948:194	P07948	0	0	0	3.40747e-22	2	-0.4549	1	0.981948	SLDNGGY(0.015)Y(0.982)IS(0.004)PR	194	Y	4067	LYN	JTK8 p53Lyn p56Lyn	protein-coding	8q12.1	LYN proto-oncogene, Src family tyrosine kinase ||| Tyrosine-protein kinase Lyn	21.4959		21.467	21.4795		21.9805	22.5622	22.6794	22.3191	22.3213	22.4667	22.3994	22.6708	22.6096	22.4196	22.8416	22.45	22.5356	21.4959	21.4732	21.9805	22.6208	22.3202	22.433	22.6402	22.6306	22.4928	21.6499	22.458	22.5878	0.808113
ph_P45984:185	P45984	0	0	0	8.91131e-06	2	0.013871	1	0.628376	TACTNFMMT(0.186)PY(0.628)VVT(0.186)R	185	Y	5601	MAPK9	JNK-55 JNK2 JNK2A JNK2ALPHA JNK2B JNK2BETA PRKM9 SAPK SAPK1a p54a p54aSAPK	protein-coding	5q35.3	mitogen-activated protein kinase 9			17.8111		17.9078		18.3813	18.4702		18.4583	17.8902	18.4306		18.8165			18.5757	18.6678	NA	17.8111	17.9078	18.4258	18.4583	18.1604	18.8165	NA	18.6218	17.8594	18.3481	18.7191	0.488697
ph_P07948:193	P07948	0	0	0	3.40747e-22	2	0.25988	1	0.849748	SLDNGGY(0.85)Y(0.15)IS(0.001)PR	193	Y	4067	LYN	JTK8 p53Lyn p56Lyn	protein-coding	8q12.1	LYN proto-oncogene, Src family tyrosine kinase ||| Tyrosine-protein kinase Lyn		19.3358	19.1016	18.8147			20.007	20.4279	19.4785		19.9095	20.5647	20.1384			20.5129			19.3358	18.9581	NA	20.2175	19.4785	20.2371	20.1384	20.5129	NA	19.147	19.9777	20.3257	0.830691
ph_Q86X29:523	Q86X29	0	0	0	0.00506284	2	3.3673	1	0.980853	S(0.019)RAY(0.981)MPPR	523	Y	51599	LSR	ILDR3 LISCH7	protein-coding	19q13.12	lipolysis stimulated lipoprotein receptor ||| Lipolysis-stimulated lipoprotein receptor	18.2034	18.4709	18.4529	18.6737		19.0166	19.7351	19.5958	19.4206	19.1839	19.4261	19.7396	19.1651	19.4482		20.8303		19.4967	18.3372	18.5633	19.0166	19.6654	19.3022	19.5829	19.3067	20.8303	19.4967	18.639	19.5168	19.8779	0.877824
ph_Q9UPZ9:157	Q9UPZ9	0	0	0	2.30958e-05	2	1.2517	2	0.971181	S(0.005)KPPY(0.033)T(0.971)DY(0.962)VS(0.023)T(0.006)R	157	T	22858	CILK1	ECO EJM10 ICK LCK2 MRK hICK	protein-coding	6p12.1	ciliogenesis associated kinase 1 ||| Serine/threonine-protein kinase ICK	20.2795	20.1395	20.1753	20.0677	20.3034	20.1747	20.5388	20.2907	20.7546	20.4867			21.0154	20.7183	21.0782	20.8201			20.2095	20.1215	20.2391	20.4147	20.6206	NA	20.8669	20.9491	NA	20.19	20.5177	20.908	0.327685
ph_Q9UPZ9:159	Q9UPZ9	0	0	0	2.30958e-05	2	1.2517	2	0.961934	S(0.005)KPPY(0.033)T(0.971)DY(0.962)VS(0.023)T(0.006)R	159	Y	22858	CILK1	ECO EJM10 ICK LCK2 MRK hICK	protein-coding	6p12.1	ciliogenesis associated kinase 1 ||| Serine/threonine-protein kinase ICK	20.2795	20.1395	20.1753	20.0677	20.3034	20.1747	20.5388	20.2907	20.7546	20.4867			21.0154	20.7183	21.0782	20.8201			20.2095	20.1215	20.2391	20.4147	20.6206	NA	20.8669	20.9491	NA	20.19	20.5177	20.908	0.327685
ph_P18206:822	P18206	0	0	0	3.88353e-50	2	0.24305	1	0.999971	SFLDSGY(1)R	822	Y	7414	VCL	CMD1W CMH15 HEL114 MV MVCL	protein-coding	10q22.2	vinculin	20.834	21.2571	21.1043	21.0688	21.4013	21.3804	21.6336	21.713	21.671	21.7991	21.7591	22.1017	21.5741	21.8976	21.7231	22.088	21.847	22.018	21.0456	21.0865	21.3908	21.6733	21.735	21.9304	21.7358	21.9056	21.9325	21.1743	21.7796	21.858	0.60528
ph_Q14247:446	Q14247	0	0	0	2.04385e-46	3	-0.31468	1	0.931939	AELSYRGPVSGTEPEPVY(0.932)S(0.068)MEAADYR	446	Y	2017	CTTN	EMS1	protein-coding	11q13.3	cortactin ||| Src substrate cortactin	21.0966	21.4899	21.1093	21.1242	21.3553	21.4398	21.7274	21.6978	21.4284	21.177	21.6032	21.5086	21.8894	21.6607	22.1206	21.7441	22.0566	22.1233	21.2932	21.1167	21.3975	21.7126	21.3027	21.5559	21.775	21.9323	22.09	21.2692	21.5237	21.9324	0.254578
ph_P46109:251	P46109	0	0	0	0.00253342	2	-0.16732	1	1	RVPCAY(1)DK	251	Y	1399	CRKL	---	protein-coding	22q11.21	CRK like proto-oncogene, adaptor protein ||| Crk-like protein	19.6059		19.7135		19.2757	19.2226	19.651		19.6569		19.9665		20.18		20.3569				19.6059	19.7135	19.2491	19.651	19.6569	19.9665	20.18	20.3569	NA	19.5229	19.7581	20.2684	0.235274
ph_Q71UM5:31	Q71UM5	0	0	0	9.51945e-08	2	-0.89743	1	0.79906	LVQSPNS(0.201)Y(0.799)FMDVK	31	Y	6232 51065	RPS27 RPS27L	DBA17 MPS-1 MPS1 S27	protein-coding	1q21.3!15q22.2	ribosomal protein S27 ||| 40S ribosomal protein S27 ||| ribosomal protein S27 like ||| 40S ribosomal protein S27-like		20.3007	20.0943			20.5357			20.5883	20.6511	20.6584	21.1874			21.2111	21.2694		21.0248	20.3007	20.0943	20.5357	NA	20.6197	20.9229	NA	21.2402	21.0248	20.3102	20.7713	21.1325	0.461075
ph_Q13164:221	Q13164	0	0	0	2.27365e-37	3	-0.27438	1	0.981024	GLCTSPAEHQYFMT(0.008)EY(0.981)VAT(0.011)R	221	Y	5598	MAPK7	BMK1 ERK4 ERK5 PRKM7	protein-coding	17p11.2	mitogen-activated protein kinase 7	21.5187	21.869	21.2194	21.5632	21.7974	21.5794	21.8062	21.7455	21.745	21.5367	21.4157	21.6848	22.3257	22.3306	22.3581	22.1976	22.0416	22.0549	21.6939	21.3913	21.6884	21.7759	21.6408	21.5502	22.3281	22.2778	22.0483	21.5912	21.6556	22.2181	0.0644448
ph_Q9C0B5:630	Q9C0B5	0	0	0	5.67807e-15	2	-0.37802	1	0.99801	GVGSPEPGPT(0.002)APY(0.998)LGR	630	Y	25921	ZDHHC5	DHHC5 ZNF375	protein-coding	11q12.1	zinc finger DHHC-type palmitoyltransferase 5 ||| Palmitoyltransferase ZDHHC5	20.7265	21.1452	21.0379	20.9261	21.0654	21.0961	21.2204	21.175	21.2048	21.2991	21.7561	21.3635	21.648	21.8252	21.4372	21.515	22.1142	21.741	20.9359	20.982	21.0807	21.1977	21.252	21.5598	21.7366	21.4761	21.9276	20.9995	21.3365	21.7134	0.33696
ph_P07355:316	P07355	0	0	0	3.75774e-06	2	0.50828	1	0.993412	S(0.003)LY(0.993)Y(0.003)Y(0.001)IQQDTK	316	Y	302 304	ANXA2 ANXA2P2	ANX2 ANX2L4 CAL1H HEL-S-270 LIP2 LPC2 LPC2D P36 PAP-IV ANX2L2 ANX2P2 LPC2B	protein-coding|pseudo	15q22.2!9p13.3	annexin A2 ||| annexin A2 pseudogene 2 ||| Putative annexin A2-like protein	18.8844		18.7556	18.9866	19.4454		19.5755	19.4652	19.5774	19.3481	19.7529	19.7538			19.8949	20.0382	19.7623	19.7825	18.8844	18.8711	19.4454	19.5203	19.4627	19.7533	NA	19.9665	19.7724	19.067	19.5788	19.8695	0.511828
ph_P27361:204	P27361	0	0	0	5.15008e-303	3	-0.32493	1;2	0.998017	IADPEHDHTGFLTEY(0.998)VAT(0.001)R	204	Y	5595	MAPK3	ERK-1 ERK1 ERT2 HS44KDAP HUMKER1A P44ERK1 P44MAPK PRKM3 p44-ERK1 p44-MAPK	protein-coding	16p11.2	mitogen-activated protein kinase 3	25.0408	25.3995	25.0115	24.8957	25.0416	24.7226	25.1899	25.3172	24.9979	24.709	25.248	25.1841	25.8461	25.5881	25.5666	25.6932	25.6665	25.5829	25.2202	24.9536	24.8821	25.2536	24.8535	25.2161	25.7171	25.6299	25.6247	25.0186	25.1077	25.6572	0.0890624
ph_Q9Y490:70	Q9Y490	0	0	0	0.00339792	2	0.2027	1	0.882271	ALDY(0.882)Y(0.118)MLR	70	Y	7094	TLN1	ILWEQ TLN talin-1	protein-coding	9p13.3	talin 1 ||| Talin-1			18.2076	18.6038	18.3332	18.8709	18.7242	18.9406			18.5318	19.1538		18.952	19.1549	19.386		19.1466	NA	18.4057	18.602	18.8324	NA	18.8428	18.952	19.2705	19.1466	18.5038	18.8376	19.123	0.333758
ph_P40189:905	P40189	0	0	0	2.0323e-38	2	-0.25329	1	0.988601	S(0.011)Y(0.989)LPQTVR	905	Y	3572	IL6ST	CD130 CDW130 GP130 HIES4 IL-6RB sGP130	protein-coding	5q11.2	interleukin 6 signal transducer ||| Interleukin-6 receptor subunit beta	23.1393	23.4067	23.409	23.5389	23.6304	23.7633	23.96	24.0411	23.9039	24.1827	24.0278	24.1297	23.8972	24.1777	24.0776	24.1125	24.1193	24.0967	23.273	23.4739	23.6968	24.0006	24.0433	24.0788	24.0374	24.0951	24.108	23.4813	24.0409	24.0802	0.559622
ph_P16591:714	P16591	0	0	0	1.26683e-05	2	-2.9634	---	0.751329	QEDGGVY(0.751)S(0.197)S(0.042)S(0.009)GLK	714	Y	2241	FER	PPP1R74 TYK3 p94-Fer	protein-coding	5q21.3	FER tyrosine kinase ||| Tyrosine-protein kinase Fer		20.5813		21.004	20.4306					21.7105	20.9781	20.8895	21.4252	21.3787			21.5313		20.5813	21.004	20.4306	NA	21.7105	20.9338	21.402	NA	21.5313	20.672	21.3222	21.4666	0.650213
ph_P08559:300	P08559	0	0	0	4.1034e-06	2	-0.44201	1	0.548791	YHGHS(0.003)MS(0.003)DPGVS(0.549)Y(0.445)R	300	S	5160 5161	PDHA1 PDHA2	PDHA PDHAD PDHCE1A PHE1A PDHAL	protein-coding	Xp22.12!4q22.3	pyruvate dehydrogenase E1 subunit alpha 1 ||| Pyruvate dehydrogenase E1 component subunit alpha, somatic form, mitochondrial ||| pyruvate dehydrogenase E1 subunit alpha 2 ||| Pyruvate dehydrogenase E1 component subunit alpha, testis-specific form, mitochondrial	17.5672	17.9057	18.4614	17.9383	18.3697	18.6776		18.9786	19.9545	19.5658		19.0419	19.0977	18.749	19.111	18.9726	18.776	18.5926	17.7365	18.1998	18.5237	18.9786	19.7602	19.0419	18.9233	19.0418	18.6843	18.1533	19.2602	18.8831	1.10689
ph_P08559:301	P08559	0	0	0	0.000157061	3	1.0564	1	0.764027	YHGHSMS(0.001)DPGVS(0.235)Y(0.764)R	301	Y	5160 5161	PDHA1 PDHA2	PDHA PDHAD PDHCE1A PHE1A PDHAL	protein-coding	Xp22.12!4q22.3	pyruvate dehydrogenase E1 subunit alpha 1 ||| Pyruvate dehydrogenase E1 component subunit alpha, somatic form, mitochondrial ||| pyruvate dehydrogenase E1 subunit alpha 2 ||| Pyruvate dehydrogenase E1 component subunit alpha, testis-specific form, mitochondrial	19.1051	20.0588	18.7862	19.2544	19.3005	19.2553	20.3262		20.4952	20.2884	19.8468		19.3128	20.0164	19.7025	19.7708	19.4701	19.6429	19.582	19.0203	19.2779	20.3262	20.3918	19.8468	19.6646	19.7367	19.5565	19.2934	20.1883	19.6526	0.894893
ph_Q06418:681	Q06418	0	0	0	1.56132e-68	2	1.1291	1;2	0.999954	KIY(1)SGDYYR	681	Y	10461 7301	MERTK TYRO3	MER RP38 Tyro12 c-Eyk c-mer BYK Dtk Etk-2 RSE Rek Sky Tif	protein-coding	2q13!15q15.1	MER proto-oncogene, tyrosine kinase ||| Tyrosine-protein kinase Mer ||| TYRO3 protein tyrosine kinase ||| Tyrosine-protein kinase receptor TYRO3	23.1014	23.5475	23.7228	23.5298	23.7851	23.7083	19.4365	19.3873	19.5632	19.5262	18.9878	19.1393		18.5726					23.3245	23.6263	23.7467	19.4119	19.5447	19.0635	18.5726	NA	NA	23.5658	19.3401	18.5726	-4.22575
ph_P01130:845	P01130	0	0	0	1.06379e-36	3	-0.42469	1	0.76223	TTEDEVHICHNQDGY(0.762)S(0.201)Y(0.035)PS(0.001)R	845	Y	3949	LDLR	FH FHC FHCL1 LDLCQ2	protein-coding	19p13.2	low density lipoprotein receptor ||| Low-density lipoprotein receptor	22.808	22.9218	23.297	23.2336	23.3036	23.1764			22.3582					20.3776			20.6656	20.6704	22.8649	23.2653	23.24	NA	22.3582	NA	20.3776	NA	20.668	23.1234	22.3582	20.5228	-0.765142
ph_Q9C0B5:456	Q9C0B5	0	0	0	6.50048e-23	2	0.10832	1	0.754242	SEGTTST(0.006)S(0.198)Y(0.754)KS(0.042)LANQTR	456	Y	25921	ZDHHC5	DHHC5 ZNF375	protein-coding	11q12.1	zinc finger DHHC-type palmitoyltransferase 5 ||| Palmitoyltransferase ZDHHC5		20.7119	20.6695	20.326	20.2965	19.8875	18.9815	18.1972	17.9934		17.9604		17.8917						20.7119	20.4977	20.092	18.5894	17.9934	17.9604	17.8917	NA	NA	20.4339	18.1811	17.8917	-2.25283
ph_Q13480:259	Q13480	0	0	0	1.52784e-16	2	1.1271	1	0.966219	APSASVDS(0.006)S(0.028)LY(0.966)NLPR	259	Y	2549	GAB1	DFNB26	protein-coding	4q31.21	GRB2 associated binding protein 1 ||| GRB2-associated-binding protein 1	18.8988	19.1216	19.3778	19.4304	19.3028		17.5181	17.2205		17.8197	17.358	17.5761							19.0102	19.4041	19.3028	17.3693	17.8197	17.467	NA	NA	NA	19.239	17.552	NA	-1.68698
ph_Q13480:659	Q13480	0	0	0	2.08242e-181	3	-0.065527	1	1	SSGSGSSVADERVDY(1)VVVDQQK	659	Y	2549	GAB1	DFNB26	protein-coding	4q31.21	GRB2 associated binding protein 1 ||| GRB2-associated-binding protein 1	23.5478	23.5662	23.9067	23.1165	23.5757	23.0349	21.7038	21.7521	21.788	21.7244									23.557	23.5116	23.3053	21.7279	21.7562	NA	NA	NA	NA	23.458	21.7421	NA	-1.71589
ph_Q9GZY6:193	Q9GZY6	0	0	0	5.31281e-36	3	0.22425	1	0.805768	T(0.001)GPT(0.002)S(0.002)GLCPS(0.031)AS(0.031)PEEDEES(0.092)EDY(0.806)QNS(0.031)AS(0.004)IHQWR	193	Y	7462	LAT2	HSPC046 LAB NTAL WBSCR15 WBSCR5 WSCR5	protein-coding	7q11.23	linker for activation of T cells family member 2 ||| Linker for activation of T-cells family member 2	21.7484	22.1626	22.0686	21.7081				20.6723	20.6853		20.5184		20.6183	20.1936					21.9555	21.8883	NA	20.6723	20.6853	20.5184	20.4059	NA	NA	21.9219	20.6253	20.4059	-1.29659
ph_Q13480:406	Q13480	0	0	0	8.9399e-68	2	-0.035256	1	1	DASSQDCY(1)DIPR	406	Y	2549	GAB1	DFNB26	protein-coding	4q31.21	GRB2 associated binding protein 1 ||| GRB2-associated-binding protein 1	22.6917	22.707	22.9829	22.6506	22.9118	22.8677	21.1267	21.0114	21.2117	21.2123	20.6235								22.6994	22.8168	22.8898	21.069	21.212	20.6235	NA	NA	NA	22.802	20.9682	NA	-1.83378
ph_Q9H467:275	Q9H467	0	0	0	0.00119968	2	0.61605	1	0.884339	AT(0.116)Y(0.884)INLKPARK	275	Y	79004	CUEDC2	C10orf66 bA18I14.5	protein-coding	10q24.32	CUE domain containing 2 ||| CUE domain-containing protein 2	18.9931		18.6074	18.5456	18.8545	18.4748						18.1122	17.2523					17.4058	18.9931	18.5765	18.6647	NA	NA	18.1122	17.2523	NA	17.4058	18.7448	18.1122	17.3291	-0.632529
ph_Q96QD8:39	Q96QD8	0	0	0	4.04564e-25	3	0.26813	1	0.532577	QAALKS(0.533)HY(0.467)ADVDPENQNFLLESNLGK	39	S	54407	SLC38A2	ATA2 PRO1068 SAT2 SNAT2	protein-coding	12q13.11	solute carrier family 38 member 2 ||| Sodium-coupled neutral amino acid transporter 2	20.4282	20.2489	20.2206			20.5792	18.9145	19.1421	19.1724	19.36	19.1983								20.3385	20.2206	20.5792	19.0283	19.2662	19.1983	NA	NA	NA	20.3795	19.1643	NA	-1.21519
ph_Q9Y446:196	Q9Y446	0	0	0	4.24397e-13	3	0.32545	1	0.526075	LGPGGLDDRY(0.469)S(0.526)LVS(0.005)EQLEPAATSTYR	196	S	11187	PKP3	---	protein-coding	11p15.5	plakophilin 3 ||| Plakophilin-3		19.9329	19.7756			19.3696	18.5674	18.3418	18.2063	17.8343	17.535								19.9329	19.7756	19.3696	18.4546	18.0203	17.535	NA	NA	NA	19.6927	18.0033	NA	-1.6894
ph_P29353:427	P29353	0	0	0	3.37519e-69	3	0.54729	1	0.97204	ELFDDPS(0.028)Y(0.972)VNVQNLDKAR	427	Y	6464	SHC1	SHC SHCA	protein-coding	1q21.3	SHC adaptor protein 1 ||| SHC-transforming protein 1	23.1104	23.79	23.4711	23.8531	23.0891	23.18	22.1532	22.454	21.6074		21.4248						20.8242		23.4502	23.6621	23.1345	22.3036	21.6074	21.4248	NA	NA	20.8242	23.4156	21.7786	20.8242	-1.63704
ph_Q9GZY6:102	Q9GZY6	0	0	0	0.00682775	2	0.30475	2	0.960883	Y(1)QNFS(0.039)KGS(0.961)R	102	S	7462	LAT2	HSPC046 LAB NTAL WBSCR15 WBSCR5 WSCR5	protein-coding	7q11.23	linker for activation of T cells family member 2 ||| Linker for activation of T-cells family member 2	18.7041	18.6508	19.1453	18.8597	18.4028	18.546					18.2192	18.3809	17.6379	17.0392	17.7713	17.9024	18.0416	16.7877	18.6775	19.0025	18.4744	NA	NA	18.3	17.3385	17.8369	17.4146	18.7181	18.3	17.53	-0.418102
ph_Q9GZY6:95	Q9GZY6	0	0	0	0.00682775	2	0.30475	2	0.999995	Y(1)QNFS(0.039)KGS(0.961)R	95	Y	7462	LAT2	HSPC046 LAB NTAL WBSCR15 WBSCR5 WSCR5	protein-coding	7q11.23	linker for activation of T cells family member 2 ||| Linker for activation of T-cells family member 2	18.7041	18.6508	19.1453	18.8597	18.4028	18.546					18.2192	18.3809	17.6379	17.0392	17.7713	17.9024	18.0416	16.7877	18.6775	19.0025	18.4744	NA	NA	18.3	17.3385	17.8369	17.4146	18.7181	18.3	17.53	-0.418102
ph_Q06124:580	Q06124	0	0	0	9.17358e-43	2	0.0081418	1	0.718271	EDS(0.718)ARVY(0.282)ENVGLMQQQK	580	S	5781	PTPN11	BPTP3 CFC JMML METCDS NS1 PTP-1D PTP2C SH-PTP2 SH-PTP3 SHP2	protein-coding	12q24.13	protein tyrosine phosphatase non-receptor type 11 ||| Tyrosine-protein phosphatase non-receptor type 11		22.1381			21.7763		20.4027			20.9402	20.476								22.1381	NA	21.7763	20.4027	20.9402	20.476	NA	NA	NA	21.9572	20.6063	NA	-1.35091
ph_Q9UKY7:244	Q9UKY7	0	0	0	1.66292e-36	2	1.6556	1	1	LQLDNQY(1)AVLENQK	244	Y	55573	CDV3	H41	protein-coding	3q22.1	CDV3 homolog ||| Protein CDV3 homolog	20.9666	21.3715	21.428	21.3622	20.9598	20.8902			20.3339	19.9393	19.8684								21.1691	21.3951	20.925	NA	20.1366	19.8684	NA	NA	NA	21.163	20.0025	NA	-1.16056
ph_O43491:88	O43491	0	0	0	1.93151e-27	2	-2.0424	1	0.986379	S(0.014)Y(0.986)TLVVAK	88	Y	2037	EPB41L2	4.1-G 4.1G	protein-coding	6q23.1-q23.2	erythrocyte membrane protein band 4.1 like 2 ||| Band 4.1-like protein 2	20.2453		20.7794	20.8113	20.8857	20.8347	18.6891	19.827	19.8509		19.7167								20.2453	20.7953	20.8602	19.258	19.8509	19.7167	NA	NA	NA	20.6336	19.6086	NA	-1.02504
ph_Q9HAU0:134	Q9HAU0	0	0	0	6.91681e-41	3	0.35603	1	0.572606	ERPISMINEAS(0.001)NY(0.05)NVT(0.188)S(0.188)DY(0.573)AVHPMSPVGR	134	Y	54477	PLEKHA5	PEPP-2 PEPP2	protein-coding	12p12.3	pleckstrin homology domain containing A5 ||| Pleckstrin homology domain-containing family A member 5		20.2667	20.3394		19.597		18.7186		19.0894						19.1584	19.3407			20.2667	20.3394	19.597	18.7186	19.0894	NA	NA	19.2496	NA	20.0677	18.904	19.2496	-1.16368
ph_Q96QD8:41	Q96QD8	0	0	0	1.43126e-52	2	0.046574	1	0.934367	S(0.066)HY(0.934)ADVDPENQNFLLESNLGK	41	Y	54407	SLC38A2	ATA2 PRO1068 SAT2 SNAT2	protein-coding	12q13.11	solute carrier family 38 member 2 ||| Sodium-coupled neutral amino acid transporter 2	21.0731	21.9982	21.295	21.6845	21.9964	22.0233	20.8801	20.9727	20.913	20.8878	20.4485	20.4145		19.8091					21.5357	21.4898	22.0099	20.9264	20.9004	20.4315	19.8091	NA	NA	21.6784	20.7528	19.8091	-0.925686
ph_Q9NZV1:1033	Q9NZV1	0	0	0	5.57717e-05	2	0.91539	1	0.820671	QNHLQADNFY(0.821)QT(0.179)V	1033	Y	51232	CRIM1	CRIM-1 S52	protein-coding	2p22.2	cysteine rich transmembrane BMP regulator 1 ||| Cysteine-rich motor neuron 1 protein		19.8732			20.1057				18.961		18.8329	18.9007							19.8732	NA	20.1057	NA	18.961	18.8668	NA	NA	NA	19.9894	18.9139	NA	-1.07556
ph_P54760:774	P54760	0	0	0	4.59867e-75	3	0.2023	1	0.991064	FLEENSSDPT(0.004)Y(0.991)T(0.004)SSLGGKIPIR	774	Y	2050	EPHB4	CMAVM2 HFASD HTK LMPHM7 MYK1 TYRO11	protein-coding	7q22.1	EPH receptor B4 ||| Ephrin type-B receptor 4	21.781	22.1278	21.8849	22.0976	21.8542	21.802	21.2465	21.5774	21.104	21.0617		21.1585				21.4483			21.9544	21.9912	21.8281	21.4119	21.0828	21.1585	NA	21.4483	NA	21.9246	21.2178	21.4483	-0.706792
ph_Q86X29:535	Q86X29	0	0	0	2.88267e-14	3	0.12602	1	0.999896	SRDDLY(1)DQDDSRDFPR	535	Y	51599	LSR	ILDR3 LISCH7	protein-coding	19q13.12	lipolysis stimulated lipoprotein receptor ||| Lipolysis-stimulated lipoprotein receptor	20.4559		20.1571	20.0702	20.5234		19.6143		19.6867		19.619								20.4559	20.1137	20.5234	19.6143	19.6867	19.619	NA	NA	NA	20.3643	19.64	NA	-0.724331
ph_Q71UM5:30	Q71UM5	0	0	0	1.18962e-06	2	-0.32175	1	0.675279	LVQSPNS(0.675)Y(0.325)FMDVK	30	S	6232 51065	RPS27 RPS27L	DBA17 MPS-1 MPS1 S27	protein-coding	1q21.3!15q22.2	ribosomal protein S27 ||| 40S ribosomal protein S27 ||| ribosomal protein S27 like ||| 40S ribosomal protein S27-like	19.9901			20.1196	20.6042		20.6414	20.69					20.9492	20.9889			21.0561		19.9901	20.1196	20.6042	20.6657	NA	NA	20.9691	NA	21.0561	20.2379	20.6657	21.0126	0.427755
ph_P25116:418	P25116	0	0	0	1.9542e-43	2	-0.2398	2	1	MDTCSSNLNNS(1)IY(1)KK	418	S	2149	F2R	CF2R HTR PAR-1 PAR1 TR	protein-coding	5q13.3	coagulation factor II thrombin receptor ||| Proteinase-activated receptor 1	21.5642	21.6994	22.0936	21.641	21.955		20.5048	19.7799	20.9155				19.0891		20.0255	19.4003			21.6318	21.8673	21.955	20.1423	20.9155	NA	19.0891	19.7129	NA	21.818	20.5289	19.401	-1.28911
ph_Q9H1C7:64	Q9H1C7	0	0	0	3.06594e-08	2	-0.61346	1	0.999984	TTVY(1)VVEDQRR	64	Y	84418	CYSTM1	C5orf32 ORF1-FL49	protein-coding	5q31.3	cysteine rich transmembrane module containing 1 ||| Cysteine-rich and transmembrane domain-containing protein 1	20.0905	17.9559	20.7631	19.9033	20.6537			18.4818		18.3013	18.765	18.3269	18.4047		18.3434		18.6684		19.0232	20.3332	20.6537	18.4818	18.3013	18.5459	18.4047	18.3434	18.6684	20.0034	18.443	18.4722	-1.56033
ph_Q9NYB9:371	Q9NYB9	0	0	0	0.000154749	2	-1.2744	1	0.953306	HTPPT(0.003)IGGS(0.043)LPY(0.953)R	371	Y	10152	ABI2	ABI-2 ABI2B AIP-1 AIP1 AblBP3 SSH3BP2 argBP1 argBPIA argBPIB	protein-coding	2q33.2	abl interactor 2			19.8244			19.6928		18.5093		19.6693	18.4754		18.6635			17.4793			NA	19.8244	19.6928	18.5093	19.6693	18.4754	18.6635	17.4793	NA	19.7586	18.8847	18.0714	-0.873908
ph_P35367:321	P35367	0	0	0	0.00260998	2	-0.37685	1	1	DY(1)VAVNR	321	Y	3269	HRH1	H1-R H1R HH1R hisH1	protein-coding	3p25.3	histamine receptor H1 ||| Histamine H1 receptor	18.9421	19.0187	19.4455	19.7678	19.7642	16.1248	18.0569	18.1477	18.5607	18.4896	18.3287		17.7506		17.8517	18.097	17.2216	16.8889	18.9804	19.6067	17.9445	18.1023	18.5252	18.3287	17.7506	17.9744	17.0552	18.8439	18.3187	17.5934	-0.525142
ph_Q99704:409	Q99704	0	0	0	6.91659e-37	3	0.13895	1	0.996712	VKEEGYELPYNPAT(0.003)DDY(0.997)AVPPPR	409	Y	1796	DOK1	P62DOK pp62	protein-coding	2p13.1	docking protein 1	20.4608	20.6574	20.761	20.5618	20.3534				19.5764		19.0393	19.2725		19.5208				19.0209	20.5591	20.6614	20.3534	NA	19.5764	19.1559	19.5208	NA	19.0209	20.5246	19.3661	19.2708	-1.15849
ph_Q96J84:622	Q96J84	0	0	0	9.27959e-29	1	0.53346	1	1	AVLY(1)ADYR	622	Y	55243	KIRREL1	KIRREL NEPH1	protein-coding	1q23.1	kirre like nephrin family adhesion molecule 1 ||| Kin of IRRE-like protein 1	23.5603	23.6569	23.6342	23.8083	23.7666	23.7885	23.3266	23.2259	23.1661	23.3151	23.2191	23.3312	23.0396	23.3048	23.1384	23.2469	23.3154	23.1299	23.6086	23.7213	23.7775	23.2763	23.2406	23.2752	23.1722	23.1927	23.2227	23.7025	23.264	23.1959	-0.438471
ph_P53778:185	P53778	0	0	0	6.15077e-125	2	-0.229	1	0.978325	QADSEMT(0.008)GY(0.978)VVT(0.014)R	185	Y	6300	MAPK12	ERK-6 ERK3 ERK6 MAPK-12 P38GAMMA PRKM12 SAPK-3 SAPK3	protein-coding	22q13.33	mitogen-activated protein kinase 12	22.2915	21.9952	22.121	21.7772	21.265	21.0595	21.2009	20.9418	21.1563	20.8902	20.9277		20.7455		20.9418				22.1434	21.9491	21.1623	21.0714	21.0232	20.9277	20.7455	20.9418	NA	21.7516	21.0074	20.8436	-0.744149
ph_Q9NUE0:6	Q9NUE0	0	0	0	1.12062e-36	3	0.11686	1;2	0.995898	MKDCEY(0.996)QQIS(0.005)PGAAPLPAS(0.999)PGAR	6	Y	84243	ZDHHC18	DHHC-18 DHHC18	protein-coding	1p36.11	zinc finger DHHC-type palmitoyltransferase 18 ||| Palmitoyltransferase ZDHHC18	20.9096		22.0747	20.7938		20.5552	20.4714	20.2058	20.4642	20.4817	19.4871	19.2917	20.1567		20.0203	19.933	20.0522	19.7815	20.9096	21.4343	20.5552	20.3386	20.473	19.3894	20.1567	19.9766	19.9168	20.9663	20.067	20.0167	-0.89934
ph_P05556:783	P05556	0	0	0	2.8851e-63	2	0.18342	1	1	WDTGENPIY(1)K	783	Y	3688	ITGB1	CD29 FNRB GPIIA MDF2 MSK12 VLA-BETA VLAB	protein-coding	10p11.22	integrin subunit beta 1 ||| Integrin beta-1	22.8853	23.0208	23.0161	23.2521	23.1915	23.2267	22.3863	22.3865	22.588	22.5502	22.5484	22.8386	22.4304	22.5727	22.4181	22.7039	22.619	22.6485	22.953	23.1341	23.2091	22.3864	22.5691	22.6935	22.5016	22.561	22.6337	23.0987	22.5497	22.5654	-0.549036
ph_P52799:304	P52799	0	0	0	1.69273e-05	2	0.42329	1	0.999991	TADSVFCPHY(1)EK	304	Y	1948	EFNB2	EPLG5 HTKL Htk-L LERK5	protein-coding	13q33.3	ephrin B2 ||| Ephrin-B2		19.6121	20.1513				19.362	18.892	19.5455	19.3495	19.2339	18.7327	19.1551	19.273	18.9315	18.6325	18.4053	19.131	19.6121	20.1513	NA	19.127	19.4475	18.9833	19.2141	18.782	18.7681	19.8817	19.1859	18.9214	-0.695763
ph_Q96RT1:1165	Q96RT1	0	0	0	0.000387217	2	-0.016284	1	0.799904	TMSVS(0.006)DFNY(0.194)S(0.8)R	1165	S	55914	ERBIN	ERBB2IP HEL-S-78 LAP2	protein-coding	5q12.3	erbb2 interacting protein ||| Erbin	20.6403					20.9364		20.1881			20.4331	20.1709				19.9266		20.131	20.6403	NA	20.9364	20.1881	NA	20.302	NA	19.9266	20.131	20.7883	20.2451	20.0288	-0.543259
ph_Q9BSJ8:822	Q9BSJ8	0	0	0	3.78333e-56	3	-0.85276	1	0.996233	HLS(0.002)PY(0.996)AT(0.002)LTVGDSSHK	822	Y	23344	ESYT1	FAM62A MBC2	protein-coding	12q13.2	extended synaptotagmin 1 ||| Extended synaptotagmin-1	23.1172	23.3326	23.1348	22.7959	23.2295	23.2685	23.2133	23.0659	22.998	23.0825	23.4959	23.2533	22.7485	22.5772	22.7486	22.6461	22.5445	22.4464	23.2249	22.9653	23.249	23.1396	23.0403	23.3746	22.6629	22.6974	22.4954	23.1464	23.1848	22.6186	0.0384054
ph_Q99569:470	Q99569	0	0	0	6.04134e-36	3	0.16257	2	0.999995	NNY(1)ALNT(0.018)T(0.077)AT(0.495)Y(0.407)AEPY(0.003)RPIQYR	470	Y	8502	PKP4	p0071	protein-coding	2q24.1	plakophilin 4 ||| Plakophilin-4	19.1504		19.6321	19.9088			18.9689	19.2953		18.855	18.2453	18.7902		18.6587	18.4534	18.6098	18.3526		19.1504	19.7705	NA	19.1321	18.855	18.5177	18.6587	18.5316	18.3526	19.4604	18.8349	18.5143	-0.625503
ph_Q9C0B5:533	Q9C0B5	0	0	0	6.03591e-47	3	-0.41057	1;2	0.999078	LVPTGPT(0.003)HREPS(0.997)PVRY(0.999)DNLS(0.001)R	533	Y	25921	ZDHHC5	DHHC5 ZNF375	protein-coding	11q12.1	zinc finger DHHC-type palmitoyltransferase 5 ||| Palmitoyltransferase ZDHHC5	25.9544	26.059	22.9403	25.9731	25.9053	25.7536	25.2339	24.8083	25.215	24.8814	25.5528	25.092	25.2733	24.8914	25.0296	20.2995	24.7621	24.7472	26.0067	24.4567	25.8295	25.0211	25.0482	25.3224	25.0824	22.6646	24.7547	25.4309	25.1306	24.1672	-0.300366
ph_Q8TF42:19	Q8TF42	0	0	0	3.18416e-07	2	-1.3553	1	0.989497	EELY(0.989)S(0.01)KVTPR	19	Y	84959	UBASH3B	STS-1 STS1 TULA-2 TULA2 p70	protein-coding	11q24.1	ubiquitin associated and SH3 domain containing B ||| Ubiquitin-associated and SH3 domain-containing protein B	20.9255	20.7564	21.5451	21.3754	20.8964	20.7555			18.7688	16.8775			18.1485	18.8242	18.6013	15.931			20.8409	21.4603	20.8259	NA	17.8231	NA	18.4863	17.2661	NA	21.0424	17.8231	17.8762	-3.21927
ph_Q99569:390	Q99569	0	0	0	4.65181e-13	3	0.2296	1	0.988823	S(0.005)S(0.005)Y(0.989)AS(0.001)QHSQLGQDLR	390	Y	8502	PKP4	p0071	protein-coding	2q24.1	plakophilin 4 ||| Plakophilin-4			20.5152	20.3867	19.317	20.2301	19.2311	19.2507			18.9326	18.8916	18.6157	19.2664		19.2086	19.7116	18.3971	NA	20.451	19.7736	19.2409	NA	18.9121	18.9411	19.2086	19.0543	20.1123	19.0765	19.068	-1.03579
ph_O60716:213	O60716	0	0	0	0.000341107	2	0.3015	1	0.918654	NFHY(0.044)PPDGY(0.919)S(0.037)R	213	Y	1500 100528016	CTNND1 TMX2-CTNND1	BCDS2 CAS CTNND P120CAS P120CTN p120 p120(CAS) p120(CTN) CTNND1 p120(cas) p120(ctn)	protein-coding|ncRNA	11q12.1	catenin delta 1 ||| TMX2-CTNND1 readthrough (NMD candidate) ||| Catenin delta-1		19.6622	20.1182			19.651	19.4531	18.9458			19.7534	18.913	19.485	19.279	19.2616	19.2571	18.9898	19.1309	19.6622	20.1182	19.651	19.1994	NA	19.3332	19.382	19.2594	19.0603	19.8105	19.2663	19.2339	-0.544127
ph_Q86X29:551	Q86X29	0	0	0	2.56879e-07	3	0.16775	1	1	SRDPHY(1)DDFR	551	Y	51599	LSR	ILDR3 LISCH7	protein-coding	19q13.12	lipolysis stimulated lipoprotein receptor ||| Lipolysis-stimulated lipoprotein receptor	22.1684	22.3365	22.4431	22.3502	21.8708	21.9895	21.9083	21.0788	21.8515	21.868	21.694	21.518	21.8899	21.8354	21.7432	21.6037	21.7902	20.9569	22.2525	22.3967	21.9302	21.4935	21.8597	21.606	21.8626	21.6735	21.3736	22.1931	21.6531	21.6365	-0.540012
ph_O75886:375	O75886	0	0	0	4.15387e-06	2	-0.004436	1	0.524213	LVNEAPVY(0.004)S(0.019)VY(0.453)S(0.524)K	375	S	10254	STAM2	Hbp STAM2A STAM2B	protein-coding	2q23.3	signal transducing adaptor molecule 2 ||| Signal transducing adapter molecule 2		20.7458	21.481				19.8632	20.1943	20.3466			20.4237		20.2399	20.2963		20.1393	19.632	20.7458	21.481	NA	20.0287	20.3466	20.4237	20.2399	20.2963	19.8856	21.1134	20.2663	20.1406	-0.847093
ph_O95490:1406	O95490	0	0	0	0.000991088	2	-2.9891	1	0.955409	RSENEDIY(0.955)Y(0.044)K	1406	Y	23266	ADGRL2	CIRL2 CL2 LEC1 LPHH1 LPHN2	protein-coding	1p31.1	adhesion G-protein-coupled receptor L2	20.9593		21.2846	21.4431	21.2069	21.2734			20.9299			20.559		20.6721	20.3531	20.4386			20.9593	21.3638	21.2402	NA	20.9299	20.559	20.6721	20.3958	NA	21.1878	20.7445	20.534	-0.443278
ph_Q7Z699:292	Q7Z699	0	0	0	1.87716e-32	2	0.090529	1	0.997987	KSDY(0.998)LY(0.002)SCGDETK	292	Y	161742	SPRED1	LGSS NFLS PPP1R147 hSpred1 spred-1	protein-coding	15q14	sprouty related EVH1 domain containing 1 ||| Sprouty-related, EVH1 domain-containing protein 1	21.1937	21.2938	21.8343	21.4609	21.7846	21.7291	21.1609	21.217	21.6406	21.381	21.4756	21.1262	21.3677	21.2018	21.1873	20.9329	18.5046	20.6868	21.2438	21.6476	21.7569	21.1889	21.5108	21.3009	21.2848	21.0601	19.5957	21.5494	21.3336	20.6469	-0.215874
ph_Q9GZY6:58	Q9GZY6	0	0	0	4.39653e-09	3	-0.44748	1	0.779736	T(0.205)Y(0.78)S(0.016)LVGQAWPGPLADMAPTRK	58	Y	7462	LAT2	HSPC046 LAB NTAL WBSCR15 WBSCR5 WSCR5	protein-coding	7q11.23	linker for activation of T cells family member 2 ||| Linker for activation of T-cells family member 2		18.9251		19.3064			18.113	18.1787	17.8131		17.8619	18.33	18.6327	18.4142	17.9371	18.3047	18.1355	18.3098	18.9251	19.3064	NA	18.1458	17.8131	18.096	18.5235	18.1209	18.2227	19.1158	18.0183	18.289	-1.09746
ph_Q13443:761	Q13443	0	0	0	4.81278e-23	3	0.067395	2	0.999706	HVSPVT(1)PPREVPIY(1)ANR	761	T	8754	ADAM9	CORD9 MCMP MDC9 Mltng	protein-coding	8p11.22	ADAM metallopeptidase domain 9 ||| Disintegrin and metalloproteinase domain-containing protein 9	22.4748	22.362	22.7102	22.3411	22.6703	22.6976	22.417	22.34	22.4287	22.5718	22.3871	22.6479	21.912	22.0956	22.0822	22.0364	22.4555	22.1534	22.4184	22.5257	22.684	22.3785	22.5002	22.5175	22.0038	22.0593	22.3045	22.5427	22.4654	22.1225	-0.0772518
ph_P22681:700	P22681	0	0	0	3.65371e-89	4	-0.31049	1	0.757226	LPPGEQCEGEEDT(0.229)EY(0.757)MT(0.012)PS(0.001)S(0.001)RPLRPLDTSQSSR	700	Y	867	CBL	C-CBL CBL2 FRA11B NSLL RNF55	protein-coding	11q23.3	Cbl proto-oncogene ||| E3 ubiquitin-protein ligase CBL			22.9891			21.349	20.436						19.6473			19.4521		18.6026	NA	22.9891	21.349	20.436	NA	NA	19.6473	19.4521	18.6026	22.169	20.436	19.234	-1.73304
ph_Q9HB71:199	Q9HB71	0	0	0	5.76458e-06	2	0.014697	1	1	KIY(1)EDGDDDMKR	199	Y	27101	CACYBP	GIG5 PNAS-107 S100A6BP SIP	protein-coding	1q25.1	calcyclin binding protein ||| Calcyclin-binding protein	19.0226		19.6436		18.8713	18.7862	18.934	18.0666			18.7014	18.2385	19.2311	17.9484	18.8756	19.0636	18.563	17.0139	19.0226	19.6436	18.8288	18.5003	NA	18.4699	18.5898	18.9696	17.7884	19.165	18.4851	18.4493	-0.679853
ph_P61026:5	P61026	0	0	0	0.000123505	2	0.57708	1	0.644243	KT(0.644)Y(0.356)DLLFK	5	T	10890	RAB10	---	protein-coding	2p23.3	RAB10, member RAS oncogene family ||| Ras-related protein Rab-10	21.1566				21.6971		20.3477			20.4929	20.2967	20.4132		20.603		20.4465	20.2608	20.5951	21.1566	NA	21.6971	20.3477	20.4929	20.355	20.603	20.4465	20.4279	21.4269	20.3985	20.4925	-1.02834
ph_Q8TEW0:1127	Q8TEW0	0	0	0	1.4734e-103	2	0.43335	1	1	EGHMMDALY(1)AQVK	1127	Y	56288	PARD3	ASIP Baz PAR3 PAR3alpha PARD-3 PARD3A PPP1R118 SE2-5L16 SE2-5LT1 SE2-5T2	protein-coding	10p11.22-p11.21	par-3 family cell polarity regulator ||| Partitioning defective 3 homolog	20.1293	20.57	20.3174	20.4674	20.4629	20.2706	20.0695	20.1228	20.1506	20.2348	20.0469					20.511	16.5826	20.2496	20.3497	20.3924	20.3668	20.0962	20.1927	20.0469	NA	20.511	18.4161	20.3696	20.1119	19.4636	-0.257699
ph_Q9UBU9:33	Q9UBU9	0	0	0	0.00178467	2	2.6647	1	1	WKY(1)GEGNRR	33	Y	10482	NXF1	MEX67 TAP	protein-coding	11q12.3	nuclear RNA export factor 1	20.7124		20.6077					20.712	20.6258	20.3079	20.6297	20.1826		20.4951		20.1419	20.0538	19.226	20.7124	20.6077	NA	20.712	20.4668	20.4061	20.4951	20.1419	19.6399	20.6601	20.5283	20.0923	-0.131753
ph_Q13443:758	Q13443	0	0	0	1.90132e-19	3	0.20099	2	0.999895	HVS(1)PVT(0.002)PPREVPIY(0.999)ANR	758	S	8754	ADAM9	CORD9 MCMP MDC9 Mltng	protein-coding	8p11.22	ADAM metallopeptidase domain 9 ||| Disintegrin and metalloproteinase domain-containing protein 9	22.5079	22.5283	22.2317	21.9944	22.726	22.2741	21.9755	21.984	22.1798	22.0102	22.1501		21.9034		21.9159		21.9496	22.2015	22.5181	22.1131	22.5001	21.9798	22.095	22.1501	21.9034	21.9159	22.0756	22.3771	22.075	21.965	-0.302103
ph_O95297:241	O95297	0	0	0	3.40887e-31	4	1.1167	1	0.995358	SLPS(0.002)GS(0.002)HQGPVIY(0.995)AQLDHS(0.001)GGHHSDKINK	241	Y	9019	MPZL1	MPZL1b PZR PZR1b PZRa PZRb	protein-coding	1q24.2	myelin protein zero like 1 ||| Myelin protein zero-like protein 1			21.7624	20.5628		20.3897	20.6067	20.5185	20.5446		20.0312	20.1647	20.0131	20.5106	20.2683	19.5754	20.3186	19.7903	NA	21.1626	20.3897	20.5626	20.5446	20.0979	20.2619	19.9218	20.0544	20.7762	20.4017	20.0794	-0.37443
ph_Q99569:1168	Q99569	0	0	0	8.8521e-54	2	0.12227	1	0.999979	STTNY(1)VDFYSTK	1168	Y	8502	PKP4	p0071	protein-coding	2q24.1	plakophilin 4 ||| Plakophilin-4	23.8649	24.1514	24.3121	24.5027	24.2892	24.153	23.9364	23.9633	23.7315	23.7513	23.6638	23.7911	24.1197	23.7738	23.7246	23.8876	23.7477	23.6162	24.0082	24.4074	24.2211	23.9498	23.7414	23.7275	23.9468	23.8061	23.682	24.2122	23.8063	23.8116	-0.405982
ph_Q9GZY6:118	Q9GZY6	0	0	0	2.15399e-52	3	-0.37012	1	0.864036	HGSEEAYIDPIAMEY(0.864)Y(0.136)NWGR	118	Y	7462	LAT2	HSPC046 LAB NTAL WBSCR15 WBSCR5 WSCR5	protein-coding	7q11.23	linker for activation of T cells family member 2 ||| Linker for activation of T-cells family member 2	19.9847	20.77	20.3966	21.0255	20.5459	20.9003	20.3514	20.6803	19.6994	20.1158	20.1152	20.0906	19.9052	20.1593	19.9773	20.3979	20.0911	20.4331	20.3773	20.7111	20.7231	20.5159	19.9076	20.1029	20.0322	20.1876	20.2621	20.6038	20.1754	20.1606	-0.428404
ph_P50395:442	P50395	0	0	0	0.00336635	2	0.40106	1	1	KKNDIY(1)GED	442	Y	2665	GDI2	HEL-S-46e RABGDIB	protein-coding	10p15.1	GDP dissociation inhibitor 2 ||| Rab GDP dissociation inhibitor beta	21.5275	21.7578		21.2872	20.8705	20.8332	20.1902	17.804	19.9655	19.7355		20.4573	20.7079	21.0431	20.6103	20.5402	20.4527	20.3888	21.6426	21.2872	20.8518	18.9971	19.8505	20.4573	20.8755	20.5752	20.4207	21.2606	19.7683	20.6238	-1.49225
ph_P16144:1492	P16144	0	0	0	0.00497422	2	0.13416	1	0.999826	DY(1)NSLTR	1492	Y	3691	ITGB4	CD104 GP150	protein-coding	17q25.1	integrin subunit beta 4 ||| Integrin beta-4	19.3666	19.382	19.4111	19.6466	19.5998	19.5565							17.9179		18.3243	18.5007	15.3222		19.3743	19.5289	19.5782	NA	NA	NA	17.9179	18.4125	15.3222	19.4938	NA	17.2175	NA
ph_P31431:197	P31431	0	0	0	0.000182704	2	0.18949	1	1	KAPTNEFY(1)A	197	Y	6385	SDC4	SYND4	protein-coding	20q13.12	syndecan 4 ||| Syndecan-4	24.0228	24.4967	24.2627	24.3914	24.6348	24.7581	24.2411	24.3484	24.0378	24.2163	24.5219	24.4546	23.6	23.8629	23.8923	24.0728	24.2651	24.2175	24.2597	24.3271	24.6965	24.2947	24.1271	24.4882	23.7314	23.9825	24.2413	24.4278	24.3033	23.9851	-0.124427
ph_Q13480:373	Q13480	0	0	0	6.63243e-13	2	-0.010585	1	0.54226	T(0.014)AS(0.054)DT(0.048)DS(0.17)S(0.17)Y(0.542)CIPT(0.001)AGMSPSR	373	Y	2549	GAB1	DFNB26	protein-coding	4q31.21	GRB2 associated binding protein 1 ||| GRB2-associated-binding protein 1	20.2333		20.3963					18.9026	18.2383										20.2333	20.3963	NA	18.9026	18.2383	NA	NA	NA	NA	20.3148	18.5705	NA	-1.74428
ph_Q9Y463:273	Q9Y463	0	0	0	8.36233e-213	1	0.17032	1	0.999999	IYQY(1)IQSR	273	Y	1859 9149	DYRK1A DYRK1B	DYRK DYRK1 HP86 MNB MNBH MRD7 AOMS3 MIRK	protein-coding	21q22.13!19q13.2	dual specificity tyrosine phosphorylation regulated kinase 1A ||| Dual specificity tyrosine-phosphorylation-regulated kinase 1A ||| dual specificity tyrosine phosphorylation regulated kinase 1B ||| Dual specificity tyrosine-phosphorylation-regulated kinase 1B	28.0939	28.344	28.088	28.1209	29.1716	28.2399	28.475	28.4808	28.3129		28.4651	28.5659	28.6868	28.6609	28.6446	17.0312	28.7163		28.2189	28.1045	28.7057	28.4779	28.3129	28.5155	28.6739	22.8379	28.7163	28.343	28.4354	26.7427	0.0923789
ph_Q13443:769	Q13443	0	0	0	6.57647e-42	2	0.056985	1;2	1	EVPIY(1)ANR	769	Y	8754	ADAM9	CORD9 MCMP MDC9 Mltng	protein-coding	8p11.22	ADAM metallopeptidase domain 9 ||| Disintegrin and metalloproteinase domain-containing protein 9	24.0068	24.213	24.233	24.1142	24.2673	24.3455	23.6583	23.5369	23.8534	23.9797	23.8937	23.9602	23.6375	23.8621	23.8977	23.9936	23.9094	23.9932	24.1099	24.1736	24.3064	23.5976	23.9166	23.9269	23.7498	23.9457	23.9513	24.1966	23.8137	23.8823	-0.382924
ph_Q96ST8:157	Q96ST8	0	0	0	1.74516e-69	2	0.099185	1	1	GGHSDDLY(1)AVPHR	157	Y	84902	CEP89	CCDC123 CEP123	protein-coding	19q13.11	centrosomal protein 89 ||| Centrosomal protein of 89 kDa	22.7818	23.0131	23.0188	22.9342	23.1706	23.3321	22.3448	22.4666	22.99	22.9833	22.8689	22.9688	22.5716	22.6282	22.8347	22.6533	22.6099	22.6107	22.8974	22.9765	23.2514	22.4057	22.9866	22.9188	22.5999	22.744	22.6103	23.0418	22.7704	22.6514	-0.271394
ph_Q86X29:372	Q86X29	0	0	0	5.07876e-50	2	-0.047283	1	0.83901	SSSAGGQGS(0.161)Y(0.839)VPLLR	372	Y	51599	LSR	ILDR3 LISCH7	protein-coding	19q13.12	lipolysis stimulated lipoprotein receptor ||| Lipolysis-stimulated lipoprotein receptor	21.6005	21.8765	22.1307	22.1724	22.0957	21.9599	21.2726	21.2909	21.7271	21.6265	21.5228	21.6991	21.606	21.4962	21.6642		21.5437	21.6299	21.7385	22.1516	22.0278	21.2818	21.6768	21.6109	21.5511	21.6642	21.5868	21.9726	21.5232	21.6007	-0.449451
ph_Q14160:1268	Q14160	0	0	0	8.17928e-08	2	2.7637	1	1	GLQPLKLDY(1)R	1268	Y	23513	SCRIB	CRIB1 SCRB1 SCRIB1 Vartul	protein-coding	8q24.3	scribble planar cell polarity protein ||| Protein scribble homolog	22.4363	22.6427	22.8426	22.431	22.3074	22.2315			21.5118		21.1177							20.8278	22.5395	22.6368	22.2695	NA	21.5118	21.1177	NA	NA	20.8278	22.4819	21.3147	20.8278	-1.16719
ph_Q00536:176	Q00536	0	0	0	6.32938e-06	2	-0.70077	1	0.912074	LGEGT(0.027)Y(0.912)AT(0.027)VY(0.034)K	176	Y	5127 5128	CDK16 CDK17	PCTAIRE PCTAIRE1 PCTGAIRE PCTK1 PCTAIRE2 PCTK2	protein-coding	Xp11.3!12q23.1	cyclin dependent kinase 16 ||| Cyclin-dependent kinase 16 ||| cyclin dependent kinase 17 ||| Cyclin-dependent kinase 17		19.0669		21.9472	23.0157	19.8283	19.6587	19.1661			18.5181	21.1613	19.1965	20.727	20.3598	18.8484	19.1036	20.6325	19.0669	21.9472	21.422	19.4124	NA	19.8397	19.9618	19.6041	19.8681	20.812	19.6261	19.8113	-1.18599
ph_Q92692:454	Q92692	0	0	0	0.000209206	2	0.50984	1	1	Y(1)HELPTLEER	454	Y	5819	NECTIN2	CD112 HVEB PRR2 PVRL2 PVRR2	protein-coding	19q13.32	nectin cell adhesion molecule 2 ||| Nectin-2	20.022	19.8465	19.9351	19.7623	20.0032	20.0223			19.1069	18.7381	18.6282								19.9343	19.8487	20.0127	NA	18.9225	18.6282	NA	NA	NA	19.9319	18.7754	NA	-1.15654
ph_P46821:1906	P46821	0	0	0	5.76185e-09	2	0.2977	1	0.91419	TSDVGGY(0.019)Y(0.067)Y(0.914)EKIER	1906	Y	4131	MAP1B	FUTSCH MAP5 PPP1R102	protein-coding	5q13.2	microtubule associated protein 1B ||| Microtubule-associated protein 1B	20.6479	20.178	20.8149	20.4029					20.2112	19.838	19.5248		20.3141			19.9672	19.9276		20.413	20.6089	NA	NA	20.0246	19.5248	20.3141	19.9672	19.9276	20.5109	19.7747	20.0696	-0.736241
ph_Q9Y2Z0:317	Q9Y2Z0	0	0	0	8.89245e-05	3	-0.17547	1	0.924343	LFQQIY(0.924)S(0.058)DGS(0.017)DEVKR	317	Y	10910	SUGT1	SGT1	protein-coding	13q14.3	SGT1 homolog, MIS12 kinetochore complex assembly cochaperone ||| Protein SGT1 homolog	18.7828	18.919	18.9943		18.5921	18.1459	18.5106	18.5002	18.298	18.1526	17.9648	18.0543	18.4426	18.0514	18.4473	18.4286	18.7286	17.9088	18.8509	18.9943	18.369	18.5054	18.2253	18.0096	18.247	18.4379	18.3187	18.7381	18.2468	18.3345	-0.491309
ph_P68363;Q13748;Q71U36;Q9BQE3:271;271;271;271	P68363;Q13748;Q71U36;Q9BQE3	0	0	0	8.88025e-11	2	0.32471	1	0.546317	IHFPLAT(0.546)Y(0.451)APVIS(0.003)AEK	271;271;271;271	T	7846 10376 84790 112714 7277	TUBA1A TUBA1B TUBA1C TUBA3E TUBA4A	B-ALPHA-1 LIS3 TUBA3 K-ALPHA-1 TUBA6 bcm948 ALS22 H2-ALPHA TUBA1	protein-coding	12q13.12!2q21.1!2q35	tubulin alpha 1a ||| Tubulin alpha-1A chain ||| tubulin alpha 1b ||| Tubulin alpha-1B chain ||| tubulin alpha 1c ||| Tubulin alpha-1C chain ||| tubulin alpha 3e ||| Tubulin alpha-3E chain ||| tubulin alpha 4a ||| Tubulin alpha-4A chain		19.3092	18.9847				18.3939	17.9834			18.0463						16.6966		19.3092	18.9847	NA	18.1886	NA	18.0463	NA	NA	16.6966	19.147	18.1175	16.6966	-1.02951
ph_Q07912:284	Q07912	0	0	0	2.22313e-43	3	-0.80174	1	1	ALPQNDDHY(1)VMQEHRK	284	Y	10188	TNK2	ACK ACK-1 ACK1 p21cdc42Hs	protein-coding	3q29	tyrosine kinase non receptor 2 ||| Activated CDC42 kinase 1	24.7883	24.8329	24.4767	24.4065	24.5808	24.6312	24.6191	24.641	24.5851	24.6262	24.4582	24.5228	24.4384	24.5018	24.4443	24.2898	24.3659	23.9685	24.8106	24.4416	24.606	24.6301	24.6057	24.4905	24.4701	24.367	24.1672	24.6194	24.5754	24.3348	-0.0440014
ph_Q16539:180	Q16539	0	0	0	1.45013e-194	2	0.027203	1;2	0.999999	HTDDEMT(1)GY(0.997)VAT(0.003)R	180	T	1432	MAPK14	CSBP CSBP1 CSBP2 CSPB1 EXIP Mxi2 PRKM14 PRKM15 RK SAPK2A p38 p38ALPHA	protein-coding	6p21.31	mitogen-activated protein kinase 14	23.3099	22.0633	22.6365	21.635	21.5145	20.5503	21.303	20.7184	21.1367	20.9141	21.1226	20.6859		23.0997	20.5572	20.3717	20.3088		22.6866	22.1357	21.0324	21.0107	21.0254	20.9042	23.0997	20.4645	20.3088	21.9516	20.9801	21.291	-0.971482
ph_Q96RT1:1104	Q96RT1	0	0	0	0	2	0.47167	1	1	RAQIPEGDY(1)LSYR	1104	Y	55914	ERBIN	ERBB2IP HEL-S-78 LAP2	protein-coding	5q12.3	erbb2 interacting protein ||| Erbin	22.1529	22.4732	22.2582	22.434	22.5858	22.5221	21.9085	22.0683	22.396	22.3435	22.0422	22.3146	22.0223	22.3025	22.1195	22.2626	22.1274	22.0081	22.313	22.3461	22.5539	21.9884	22.3697	22.1784	22.1624	22.1911	22.0677	22.4044	22.1789	22.1404	-0.225504
ph_P50402:167	P50402	0	0	0	5.32201e-08	3	0.32156	1	0.662014	DSAY(0.014)QS(0.054)IT(0.2)HY(0.662)RPVS(0.054)AS(0.015)R	167	Y	2010	EMD	EDMD LEMD5 STA	protein-coding	Xq28	emerin	20.5027		20.7573		20.6351									19.812		19.4138			20.5027	20.7573	20.6351	NA	NA	NA	19.812	19.4138	NA	20.6317	NA	19.6129	NA
ph_P05783:36	P05783	0	0	0	4.55554e-13	3	-0.15459	1	0.564053	SLGSVQAPS(0.025)Y(0.023)GARPVS(0.076)S(0.076)AAS(0.213)VY(0.564)AGAGGS(0.011)GS(0.011)R	36	Y	3875	KRT18	CK-18 CYK18 K18	protein-coding	12q13.13	keratin 18 ||| Keratin, type I cytoskeletal 18	20.5819	20.3624				20.4512		20.2538			20.4864	20.0865		20.2126		20.3359		20.3212	20.4721	NA	20.4512	20.2538	NA	20.2865	20.2126	20.3359	20.3212	20.4617	20.2702	20.2899	-0.191495
ph_Q9BYI3:493	Q9BYI3	0	0	0	1.68224e-05	2	0.067973	1	0.999914	LIY(1)VSER	493	Y	84668	FAM126A	DRCTNNB1A HCC HLD5 HYCC1	protein-coding	7p15.3	family with sequence similarity 126 member A ||| Hyccin				20.4074				17.1716		19.4567		18.9549			16.6999		17.5507		NA	20.4074	NA	17.1716	19.4567	18.9549	NA	16.6999	17.5507	20.4074	18.5278	17.1253	-1.87963
ph_P55196:1230	P55196	0	0	0	0.000206868	2	0.014545	1	0.999998	EY(1)FTFPASK	1230	Y	4301	AFDN	AF6 MLL-AF6 MLLT4 l-afadin	protein-coding	6q27	afadin, adherens junction formation factor ||| Afadin	20.4752	21.0287	21.1904	21.4012	21.1297		20.5415	20.7796	20.7735	20.993		21.2756	20.7545	20.5456	20.7615	20.9204	20.8353	20.5179	20.752	21.2958	21.1297	20.6605	20.8832	21.2756	20.65	20.841	20.6766	21.0592	20.9398	20.7225	-0.119344
ph_Q8IWW6:240	Q8IWW6	0	0	0	7.97652e-21	3	-0.29569	2;3	0.999783	AT(0.5)T(0.5)PPNQGRPDS(1)PVY(1)ANLQELK	240	S	94134	ARHGAP12	---	protein-coding	10p11.22	Rho GTPase activating protein 12 ||| Rho GTPase-activating protein 12	21.8324	21.9886	22.7547						21.5571		19.2585								21.9105	22.7547	NA	NA	21.5571	19.2585	NA	NA	NA	22.3326	20.4078	NA	-1.92482
ph_Q8IWW6:243	Q8IWW6	0	0	0	7.97652e-21	3	-0.29569	2;3	0.999971	AT(0.5)T(0.5)PPNQGRPDS(1)PVY(1)ANLQELK	243	Y	94134	ARHGAP12	---	protein-coding	10p11.22	Rho GTPase activating protein 12 ||| Rho GTPase-activating protein 12	21.8324	21.9886	22.7547						21.5571		19.2585								21.9105	22.7547	NA	NA	21.5571	19.2585	NA	NA	NA	22.3326	20.4078	NA	-1.92482
ph_P53801:165	P53801	0	0	0	3.14336e-05	2	0.30556	2	1	Y(1)GLFKEENPY(1)AR	165	Y	754	PTTG1IP	C21orf1 C21orf3 PBF	protein-coding	21q22.3	PTTG1 interacting protein ||| Pituitary tumor-transforming gene 1 protein-interacting protein		18.1721	17.7618			18.5552	17.9586	17.9842			18.261	18.2391			18.0029		17.2847		18.1721	17.7618	18.5552	17.9714	NA	18.25	NA	18.0029	17.2847	18.163	18.1107	17.6438	-0.052301
ph_Q5T8I3:353	Q5T8I3	0	0	0	5.3778e-07	2	-0.57674	1	0.999436	VGS(0.001)GAY(0.999)EQVVIKR	353	Y	284611	FAM102B	SYM-3B	protein-coding	1p13.3	family with sequence similarity 102 member B ||| Protein FAM102B			19.5201	18.9173	18.5929	19.0612	18.035			18.2749				17.9989					NA	19.2187	18.8271	18.035	18.2749	NA	17.9989	NA	NA	19.0229	18.1549	17.9989	-0.867965
ph_O60716:232	O60716	0	0	0	3.95009e-36	3	-0.21041	2	0.666746	HYEDGY(0.001)PGGS(0.468)DNY(0.246)GS(0.558)LS(0.667)RVT(0.06)R	232	S	1500 100528016	CTNND1 TMX2-CTNND1	BCDS2 CAS CTNND P120CAS P120CTN p120 p120(CAS) p120(CTN) CTNND1 p120(cas) p120(ctn)	protein-coding|ncRNA	11q12.1	catenin delta 1 ||| TMX2-CTNND1 readthrough (NMD candidate) ||| Catenin delta-1			22.2907				21.0032	21.1622	19.9236	19.7826	20.4238	20.1034		19.3235			19.5751		NA	22.2907	NA	21.0827	19.8531	20.2636	19.3235	NA	19.5751	22.2907	20.3998	19.4493	-1.89093
ph_Q8IV50:208	Q8IV50	0	0	0	2.22055e-12	3	-0.42159	1	0.903637	LKEESRDEES(0.001)PY(0.904)AT(0.074)S(0.019)LY(0.002)HS	208	Y	256586	LYSMD2	---	protein-coding	15q21.2	LysM domain containing 2 ||| LysM and putative peptidoglycan-binding domain-containing protein 2			21.5265	20.8922		20.9511	20.3916	20.4814		20.0665									NA	21.2093	20.9511	20.4365	20.0665	NA	NA	NA	NA	21.0802	20.2515	NA	-0.828695
ph_P29317:588	P29317	0	0	0	9.30812e-60	3	0.1578	1;2	0.830883	T(0.169)Y(0.831)VDPHTYEDPNQAVLK	588	Y	1969	EPHA2	ARCC2 CTPA CTPP1 CTRCT6 ECK	protein-coding	1p36.13	EPH receptor A2 ||| Ephrin type-A receptor 2	25.6197	25.3937	25.6064	20.9144	25.4454	20.9929		25.4994	20.7515	20.7365	25.2828	25.2411	21.5376	25.5942	20.9072			24.6394	25.5067	23.2604	23.2192	25.4994	20.744	25.262	23.5659	20.9072	24.6394	23.9954	23.8351	23.0375	-0.160295
ph_Q9Y2I7:1041	Q9Y2I7	0	0	0	0.00337313	2	0.29373	1	0.974499	T(0.025)Y(0.974)S(0.001)LAFK	1041	Y	200576	PIKFYVE	CFD FAB1 HEL37 PIP5K PIP5K3 ZFYVE29	protein-coding	2q34	phosphoinositide kinase, FYVE-type zinc finger containing ||| 1-phosphatidylinositol 3-phosphate 5-kinase	20.0438			21.2101	21.3047	21.7628			21.1377	15.3263	21.3811			17.5814				21.9719	20.0438	21.2101	21.5337	NA	18.232	21.3811	17.5814	NA	21.9719	20.9292	19.8065	19.7766	-1.12264
ph_Q8TEW0:1221	Q8TEW0	0	0	0	0.00474754	2	0.025213	1	0.974487	QY(0.974)S(0.022)S(0.004)LPR	1221	Y	56288	PARD3	ASIP Baz PAR3 PAR3alpha PARD-3 PARD3A PPP1R118 SE2-5L16 SE2-5LT1 SE2-5T2	protein-coding	10p11.22-p11.21	par-3 family cell polarity regulator ||| Partitioning defective 3 homolog	19.0851	19.3798	19.4538	19.6402		19.2541	18.3665					18.7317						17.0718	19.2325	19.547	19.2541	18.3665	NA	18.7317	NA	NA	17.0718	19.3445	18.5491	17.0718	-0.795408
ph_O75955:160	O75955	0	0	0	5.73908e-05	3	-0.53507	1	0.991611	DIHDDQDY(0.992)LHS(0.008)LGK	160	Y	10211	FLOT1	---	protein-coding	6p21.33	flotillin 1 ||| Flotillin-1	19.7447	20.3434	20.2987			20.6435	19.2277	19.1734		19.7115							18.5525		20.044	20.2987	20.6435	19.2005	19.7115	NA	NA	NA	18.5525	20.3288	19.456	18.5525	-0.872776
ph_P49841:216	P49841	0	0	0	4.48225e-244	2	0.1172	1	0.999682	QLVRGEPNVSY(1)ICSR	216	Y	2931 2932	GSK3A GSK3B	---	protein-coding	19q13.2!3q13.33	glycogen synthase kinase 3 alpha ||| Glycogen synthase kinase-3 alpha ||| glycogen synthase kinase 3 beta ||| Glycogen synthase kinase-3 beta	25.3588	25.5538	24.6459	24.3933	24.4601		25.2105	25.0034	23.3252	23.3467	24.0156	24.1629	24.5297	24.7718	23.7022	23.6466	24.8006	24.4443	25.4563	24.5196	24.4601	25.107	23.3359	24.0892	24.6508	23.6744	24.6224	24.812	24.1774	24.3159	-0.634622
ph_Q06124:546	Q06124	0	0	0	6.28163e-30	2	1.4667	1	0.996226	RKGHEY(0.996)T(0.004)NIK	546	Y	5781	PTPN11	BPTP3 CFC JMML METCDS NS1 PTP-1D PTP2C SH-PTP2 SH-PTP3 SHP2	protein-coding	12q24.13	protein tyrosine phosphatase non-receptor type 11 ||| Tyrosine-protein phosphatase non-receptor type 11	22.568	23.0273	23.099	23.3378	23.0346		22.9582	23.7292	22.945	22.827	23.4361		23.1769	23.3481	23.3686	23.1901	16.2971	22.7784	22.7977	23.2184	23.0346	23.3437	22.886	23.4361	23.2625	23.2794	19.5377	23.0169	23.2219	22.0265	0.205052
ph_Q96J84:625	Q96J84	0	0	0	3.98802e-20	2	0.38768	1	0.996629	AVLY(0.003)ADY(0.997)RAPGPAR	625	Y	55243	KIRREL1	KIRREL NEPH1	protein-coding	1q23.1	kirre like nephrin family adhesion molecule 1 ||| Kin of IRRE-like protein 1	20.6605	20.8746	21.0788		21.0982	20.9154	20.3338		20.5185										20.7676	21.0788	21.0068	20.3338	20.5185	NA	NA	NA	NA	20.951	20.4261	NA	-0.524906
ph_Q6ZVM7:404	Q6ZVM7	0	0	0	7.62815e-38	3	0.91411	1	0.910747	KT(0.045)VT(0.045)Y(0.911)EDPQAVGGLASALDNRK	404	Y	146691	TOM1L2	---	protein-coding	17p11.2	target of myb1 like 2 membrane trafficking protein ||| TOM1-like protein 2	20.5971			20.5592										19.8338				19.0204	20.5971	20.5592	NA	NA	NA	NA	19.8338	NA	19.0204	20.5782	NA	19.4271	NA
ph_Q96J84:605	Q96J84	0	0	0	3.27347e-55	3	-0.42619	1	0.830291	CDTIDTREEYEMKDPT(0.002)NGY(0.83)Y(0.168)NVR	605	Y	55243	KIRREL1	KIRREL NEPH1	protein-coding	1q23.1	kirre like nephrin family adhesion molecule 1 ||| Kin of IRRE-like protein 1		21.352	21.1651		21.1208	20.4831			20.8394		20.7565		21.0788				20.4094		21.352	21.1651	20.8019	NA	20.8394	20.7565	21.0788	NA	20.4094	21.1064	20.798	20.7441	-0.308373
ph_O14974:911	O14974	0	0	0	1.67366e-08	2	1.0457	1	0.987053	SGS(0.005)Y(0.987)S(0.004)Y(0.005)LEER	911	Y	4659	PPP1R12A	M130 MBS MYPT1	protein-coding	12q21.2-q21.31	protein phosphatase 1 regulatory subunit 12A			20.2678	20.6239	20.112	20.4155			20.0037		17.9928				20.007	20.0867	19.6641		NA	20.4458	20.2638	NA	20.0037	17.9928	NA	20.0468	19.6641	20.3548	18.9982	19.8555	-1.35657
ph_P37802:8	P37802	0	0	0	0.00277527	2	-0.51733	1	0.95982	GPAY(0.96)GLS(0.04)R	8	Y	8407	TAGLN2	HA1756	protein-coding	1q23.2	transgelin 2 ||| Transgelin-2		19.4571	19.3947	19.9122	18.765	19.4382	18.3769		19.5385			16.3222					19.3595		19.4571	19.6535	19.1016	18.3769	19.5385	16.3222	NA	NA	19.3595	19.404	18.0792	19.3595	-1.32483
ph_Q8TEW0:489	Q8TEW0	0	0	0	3.03073e-07	2	0.14537	1	0.997034	DVTIGGS(0.003)APIY(0.997)VK	489	Y	56288	PARD3	ASIP Baz PAR3 PAR3alpha PARD-3 PARD3A PPP1R118 SE2-5L16 SE2-5LT1 SE2-5T2	protein-coding	10p11.22-p11.21	par-3 family cell polarity regulator ||| Partitioning defective 3 homolog	19.6416	20.2251	19.6987		20.0007	19.9629	19.4553	19.6153			16.5538								19.9334	19.6987	19.9818	19.5353	NA	16.5538	NA	NA	NA	19.8713	18.0445	NA	-1.82675
ph_Q96RT1:1164	Q96RT1	0	0	0	1.56953e-14	2	0.15535	1	0.804561	TMSVSDFNY(0.805)S(0.195)R	1164	Y	55914	ERBIN	ERBB2IP HEL-S-78 LAP2	protein-coding	5q12.3	erbb2 interacting protein ||| Erbin		21.0601	20.8414	21.0076	20.5524		20.0797		20.3328	20.4921									21.0601	20.9245	20.5524	20.0797	20.4125	NA	NA	NA	NA	20.8457	20.2461	NA	-0.599595
ph_Q6NYC8:230	Q6NYC8	0	0	0	1.814e-07	2	0.11656	1	0.994896	LSPGES(0.005)AY(0.995)QK	230	Y	170954	PPP1R18	HKMT1098 KIAA1949	protein-coding	6p21.33	protein phosphatase 1 regulatory subunit 18 ||| Phostensin	22.3417		22.7514	22.6467	22.7008	22.723		22.0173	22.0405	21.9969	22.2218			22.078	22.4733	22.4834	22.6598	22.3267	22.3417	22.699	22.7119	22.0173	22.0187	22.2218	22.078	22.4783	22.4933	22.5842	22.0859	22.3499	-0.498289
ph_Q96FJ2:64	Q96FJ2	0	0	0	0.00108225	2	0.9411	1	0.548252	NFGS(0.548)Y(0.419)VT(0.033)HETK	64	S	8655 140735	DYNLL1 DYNLL2	DLC1 DLC8 DNCL1 DNCLC1 LC8 LC8a PIN hdlc1 DNCL1B Dlc2 RSPH22	protein-coding	12q24.31!17q22	dynein light chain LC8-type 1 ||| Dynein light chain 1, cytoplasmic ||| dynein light chain LC8-type 2 ||| Dynein light chain 2, cytoplasmic			21.6166			21.9669		17.5734						22.0794	21.5811	18.6207	18.4991	21.8605	NA	21.6166	21.9669	17.5734	NA	NA	22.0794	20.1009	20.1798	21.7917	17.5734	20.7867	-4.21831
ph_Q12791:1230	Q12791	0	0	0	0.00491795	2	0.72681	1	1	Y(1)VQEERL	1230	Y	3778	KCNMA1	BKTM CADEDS IEG16 KCa1.1 MaxiK PNKD3 SAKCA SLO SLO-ALPHA SLO1 bA205K10.1 hSlo mSLO1	protein-coding	10q22.3	potassium calcium-activated channel subfamily M alpha 1 ||| Calcium-activated potassium channel subunit alpha-1	18.6999		19.0312	19.1759	19.4436	19.4182	19.1463		19.2578	19.3247	19.358	18.9529		18.7646	18.9069	19.1809	18.6838	18.9741	18.6999	19.1036	19.4309	19.1463	19.2912	19.1554	18.7646	19.0439	18.829	19.0781	19.1976	18.8791	0.119523
ph_Q96J84:730	Q96J84	0	0	0	5.18392e-19	3	0.090538	1	0.963986	TPYEAYDPIGKY(0.964)AT(0.027)AT(0.009)R	730	Y	55243	KIRREL1	KIRREL NEPH1	protein-coding	1q23.1	kirre like nephrin family adhesion molecule 1 ||| Kin of IRRE-like protein 1	20.1013		20.1894						19.4912					19.7268		19.7031			20.1013	20.1894	NA	NA	19.4912	NA	19.7268	19.7031	NA	20.1454	19.4912	19.7149	-0.654175
ph_O60716:257	O60716	0	0	0	1.15554e-18	2	-0.56432	1	1	QDVY(1)GPQPQVR	257	Y	1500 100528016	CTNND1 TMX2-CTNND1	BCDS2 CAS CTNND P120CAS P120CTN p120 p120(CAS) p120(CTN) CTNND1 p120(cas) p120(ctn)	protein-coding|ncRNA	11q12.1	catenin delta 1 ||| TMX2-CTNND1 readthrough (NMD candidate) ||| Catenin delta-1	22.2943	22.3683	22.5228	22.4065	22.5076	22.488	22.2793	22.0208	22.3206	22.4817	22.3587	22.2965	22.1795	22.326	22.2545	22.1474	22.5278	22.2264	22.3313	22.4646	22.4978	22.1501	22.4012	22.3276	22.2528	22.201	22.3771	22.4312	22.293	22.2769	-0.138287
ph_P08581:1235	P08581	0	0	0	1.45589e-283	2	0.1284	1;2	0.96189	DMYDKEY(0.999)Y(0.962)S(0.039)VHNK	1235	Y	4233	MET	AUTS9 DFNB97 HGFR RCCP2 c-Met	protein-coding	7q31.2	MET proto-oncogene, receptor tyrosine kinase ||| Hepatocyte growth factor receptor	22.0155	19.3713	23.078	21.9351	21.2873		20.8596	21.124	20.8285	20.6771	20.0433	20.281							20.6934	22.5065	21.2873	20.9918	20.7528	20.1621	NA	NA	NA	21.4958	20.6356	NA	-0.860175
ph_P30530:759	P30530	0	0	0	2.10587e-11	2	-0.51441	1	0.880342	GQTPYPGVENS(0.068)EIY(0.88)DY(0.052)LR	759	Y	558	AXL	ARK JTK11 Tyro7 UFO	protein-coding	19q13.2	AXL receptor tyrosine kinase ||| Tyrosine-protein kinase receptor UFO	19.1586		18.9266	18.9432		20.0712	19.2437							18.7223	18.6633				19.1586	18.9349	20.0712	19.2437	NA	NA	18.7223	18.6633	NA	19.3882	19.2437	18.6928	-0.144492
ph_Q13009:384	Q13009	0	0	0	0.011677	2	-3.4626	---	1	QGVY(1)ENFRR	384	Y	7074	TIAM1	TIAM-1	protein-coding	21q22.11	TIAM Rac1 associated GEF 1 ||| T-lymphoma invasion and metastasis-inducing protein 1			21.5389	20.9258		19.9577				20.3486				19.2432	20.4239		19.0627		NA	21.2323	19.9577	NA	20.3486	NA	19.2432	20.4239	19.0627	20.595	20.3486	19.5766	-0.246435
ph_P07947:32	P07947	0	0	0	6.15706e-50	3	-0.3639	1	0.97087	YRPENTPEPVS(0.004)T(0.004)S(0.004)VS(0.009)HY(0.971)GAEPT(0.003)T(0.004)VS(0.001)PCPSSSAK	32	Y	7525	YES1	HsT441 P61-YES Yes c-yes	protein-coding	18p11.32	YES proto-oncogene 1, Src family tyrosine kinase ||| Tyrosine-protein kinase Yes		20.7034	21.157				20.2433		20.5699		20.235		20.4707			20.4419	20.1743	21.3952	20.7034	21.157	NA	20.2433	20.5699	20.235	20.4707	20.4419	20.7848	20.9302	20.3494	20.5658	-0.580796
ph_Q8TEW0:719	Q8TEW0	0	0	0	2.72796e-42	2	0.44875	1;2	0.998534	ISHSLY(0.999)S(0.001)GIEGLDESPSR	719	Y	56288	PARD3	ASIP Baz PAR3 PAR3alpha PARD-3 PARD3A PPP1R118 SE2-5L16 SE2-5LT1 SE2-5T2	protein-coding	10p11.22-p11.21	par-3 family cell polarity regulator ||| Partitioning defective 3 homolog	19.9566		20.6018	20.046	21.0588	20.2389			18.8805	19.6723	19.9264	20.9211	19.8361	19.4246	19.8171		20.4703	20.323	19.9566	20.3239	20.6488	NA	19.2764	20.4238	19.6303	19.8171	20.3967	20.3098	19.8501	19.948	-0.459703
ph_Q96FJ2:65	Q96FJ2	0	0	0	6.91777e-19	2	0.4998	1	0.953575	NFGS(0.044)Y(0.954)VT(0.002)HETK	65	Y	8655 140735	DYNLL1 DYNLL2	DLC1 DLC8 DNCL1 DNCLC1 LC8 LC8a PIN hdlc1 DNCL1B Dlc2 RSPH22	protein-coding	12q24.31!17q22	dynein light chain LC8-type 1 ||| Dynein light chain 1, cytoplasmic ||| dynein light chain LC8-type 2 ||| Dynein light chain 2, cytoplasmic	21.8611	21.8098		21.5025	21.8592		22.0692	22.0829	21.6566	21.397	21.953	21.8842	21.8825	18.3219		21.7104	21.9782		21.8354	21.5025	21.8592	22.0761	21.5268	21.9186	20.1022	21.7104	21.9782	21.7324	21.8405	21.2636	0.10813
ph_P56945:387	P56945	0	0	0	5.58032e-10	3	0.58512	1	0.999942	RPGPGTLY(1)DVPR	387	Y	9564	BCAR1	CAS CAS1 CASS1 CRKAS P130Cas	protein-coding	16q23.1	BCAR1 scaffold protein, Cas family member ||| Breast cancer anti-estrogen resistance protein 1	22.6589	22.9101	22.4045	22.4259	22.0281	22.4511	22.122	22.4047	21.9749	21.9545	22.057	22.2814	22.1281		22.3233			22.2786	22.7845	22.4152	22.2396	22.2634	21.9647	22.1692	22.1281	22.3233	22.2786	22.4798	22.1324	22.2433	-0.347351
ph_Q9UJU6:140	Q9UJU6	0	0	0	0.000413601	2	1.0224	1	0.942576	ASGANY(0.943)S(0.057)FHK	140	Y	28988	DBNL	ABP1 HIP-55 HIP55 SH3P7	protein-coding	7p13	drebrin like ||| Drebrin-like protein		18.8078	19.4693		18.3568	18.2446	18.274		18.5721	18.5516	18.302	18.1878	18.5261	18.4397		18.4556	18.8024	18.3064	18.8078	19.4693	18.3007	18.274	18.5618	18.2449	18.4829	18.4556	18.5544	18.8593	18.3602	18.4976	-0.499025
ph_Q96QD8:28	Q96QD8	0	0	0	1.55406e-12	2	0.13851	1	0.67046	FSISPDEDSSSYS(0.001)S(0.002)NS(0.012)DFNY(0.67)S(0.234)Y(0.075)PT(0.004)K	28	Y	54407	SLC38A2	ATA2 PRO1068 SAT2 SNAT2	protein-coding	12q13.11	solute carrier family 38 member 2 ||| Sodium-coupled neutral amino acid transporter 2			20.2997	20.501				18.7707		18.4639		18.7745	18.3806	18.154	17.4492	18.0937	18.4496	18.6147	NA	20.4004	NA	18.7707	18.4639	18.7745	18.2673	17.7714	18.5321	20.4004	18.6697	18.1903	-1.73067
ph_O14964:334	O14964	0	0	0	0.00078412	2	0.36634	1	0.999612	YLNRNY(1)WEK	334	Y	9146	HGS	HRS	protein-coding	17q25.3	hepatocyte growth factor-regulated tyrosine kinase substrate	20.2382	20.3736	17.237	19.9925	20.258		19.8516	20.0199	19.4394	19.7292	19.736	19.5911	19.8471	19.3643	19.6345	19.2862	19.4172		20.3059	18.6147	20.258	19.9358	19.5843	19.6635	19.6057	19.4604	19.4172	19.7262	19.7279	19.4944	0.00168338
ph_Q07912:859	Q07912	0	0	0	1.0747e-27	3	-0.048112	1	0.949662	VSST(0.002)HY(0.95)Y(0.048)LLPERPSYLER	859	Y	10188	TNK2	ACK ACK-1 ACK1 p21cdc42Hs	protein-coding	3q29	tyrosine kinase non receptor 2 ||| Activated CDC42 kinase 1	22.5065	22.9456	22.6502	22.1989	22.4066	22.1918	22.1474	22.2499	22.1753	21.883	22.2194		22.5153	22.7324	22.2093	22.3066	22.015		22.7261	22.4246	22.2992	22.1986	22.0291	22.2194	22.6239	22.2579	22.015	22.4833	22.1491	22.2989	-0.334211
ph_P08670:38	P08670	0	0	0	2.52408e-75	3	0.16964	1	0.981932	T(0.018)Y(0.982)SLGSALRPSTSR	38	Y	7431	VIM	---	protein-coding	10p13	vimentin	21.3285	21.7688	21.6936	22.0838	21.5236	21.5671	21.4038	21.436		21.3789	21.3302	21.6549	21.292	21.7122	21.4406	21.3793	21.384	21.6666	21.5487	21.8887	21.5453	21.4199	21.3789	21.4925	21.5021	21.41	21.5253	21.6609	21.4304	21.4791	-0.230466
ph_Q93052:300	Q93052	0	0	0	9.12191e-07	2	-0.42236	1	0.828093	Y(0.006)Y(0.006)EGY(0.828)Y(0.16)AAGPGYGGR	300	Y	4026	LPP	---	protein-coding	3q27.3-q28	LIM domain containing preferred translocation partner in lipoma ||| Lipoma-preferred partner	19.2587	19.2503	19.3087	19.2176	19.4014	19.1046	18.9739	18.7103	19.4031	18.9213	18.9634	18.8346	19.3966	18.515			19.2241		19.2545	19.2632	19.253	18.8421	19.1622	18.899	18.9558	NA	19.2241	19.2569	18.9678	19.09	-0.289121
ph_Q86SQ4:1184	Q86SQ4	0	0	0	0.0016311	2	-1.3675	1	0.947074	SSST(0.002)T(0.051)Y(0.947)FKR	1184	Y	57211	ADGRG6	APG1 DREG GPR126 LCCS9 PR126 PS1TP2 VIGR	protein-coding	6q24.2	adhesion G-protein-coupled receptor G6 ||| Adhesion G-protein coupled receptor G6	20.2765	20.1859	20.549					20.1878	20.5183	20.2149	20.3558		19.9189	20.2149	20.2152	20.4479	20.3826	20.0333	20.2312	20.549	NA	20.1878	20.3666	20.3558	20.0669	20.3316	20.2079	20.3901	20.3034	20.2021	-0.0866754
ph_P07355:238	P07355	0	0	0	4.24777e-17	2	0.89011	1	0.999339	SYSPY(0.999)DMLESIRK	238	Y	302 304	ANXA2 ANXA2P2	ANX2 ANX2L4 CAL1H HEL-S-270 LIP2 LPC2 LPC2D P36 PAP-IV ANX2L2 ANX2P2 LPC2B	protein-coding|pseudo	15q22.2!9p13.3	annexin A2 ||| annexin A2 pseudogene 2 ||| Putative annexin A2-like protein		19.7071								19.1819	19.3438					19.514	16.273		19.7071	NA	NA	NA	19.1819	19.3438	NA	19.514	16.273	19.7071	19.2629	17.8935	-0.444281
ph_P27448:508	P27448	0	0	0	0.000529323	2	0.32371	1	0.999262	NT(0.001)Y(0.999)VCSER	508	Y	4140	MARK3	CTAK1 KP78 PAR1A Par-1a VIPB	protein-coding	14q32.32-q32.33	microtubule affinity regulating kinase 3 ||| MAP/microtubule affinity-regulating kinase 3	20.8515	21.3181	20.9361			20.4636	20.4468	20.6405		20.0836	20.5523	20.312	20.8061	20.6645	20.904	20.4909	20.7094	20.0228	21.0848	20.9361	20.4636	20.5437	20.0836	20.4322	20.7353	20.6974	20.3661	20.8282	20.3531	20.5996	-0.47504
ph_Q9ULC8:606	Q9ULC8	0	0	0	8.91894e-06	3	-0.60241	1	0.534882	Y(0.465)GS(0.535)RDDLVAGPGFGGAR	606	S	29801	ZDHHC8	DHHC8 ZDHHCL1 ZNF378	protein-coding	22q11.21	zinc finger DHHC-type palmitoyltransferase 8 ||| Probable palmitoyltransferase ZDHHC8	19.948		19.4093				19.1013					19.6345	19.2878	20.1016	18.899	19.4023	19.3426	19.3104	19.948	19.4093	NA	19.1013	NA	19.6345	19.6947	19.1507	19.3265	19.6786	19.3679	19.3906	-0.310719
ph_P35568:612	P35568	0	0	0	2.55989e-26	4	0.023862	1	0.811428	GGHHRPDS(0.031)S(0.031)T(0.031)LHT(0.093)DDGY(0.811)MPMS(0.002)PGVAPVPSGR	612	Y	3667	IRS1	HIRS-1	protein-coding	2q36.3	insulin receptor substrate 1	21.4502					20.3752	20.1579	19.7746	20.0068	19.8205	20.7302		20.4236			20.4605	20.4812		21.4502	NA	20.3752	19.9663	19.9136	20.7302	20.4236	20.4605	20.4812	20.9127	20.2034	20.4551	-0.709344
ph_P29317:587	P29317	0	0	0	1.5752e-134	3	0.085118	1;2	0.973686	SEQLKPLKT(0.974)Y(0.026)VDPHT(0.09)Y(0.91)EDPNQAVLK	587	T	1969	EPHA2	ARCC2 CTPA CTPP1 CTRCT6 ECK	protein-coding	1p36.13	EPH receptor A2 ||| Ephrin type-A receptor 2	26.217	26.0727	26.1565	25.4339	26.2054	25.5965	26.3531	25.9018	25.9726	25.5981	25.707	25.5969	26.4381	25.8641	25.8538	25.7533	25.5473	25.0471	26.1449	25.7952	25.901	26.1274	25.7854	25.6519	26.1511	25.8035	25.2972	25.947	25.8549	25.7506	-0.0921218
ph_Q8TEW0:1080	Q8TEW0	0	0	0	0	2	-0.2575	1	1	ERDY(1)AEIQDFHR	1080	Y	56288	PARD3	ASIP Baz PAR3 PAR3alpha PARD-3 PARD3A PPP1R118 SE2-5L16 SE2-5LT1 SE2-5T2	protein-coding	10p11.22-p11.21	par-3 family cell polarity regulator ||| Partitioning defective 3 homolog	25.2637	25.4712	25.5854	25.4442	25.6616	25.7173	25.4939	25.3809	25.3779	25.4143	25.3579	25.4183	25.4619	25.4436	25.395	25.3407	25.41	25.3834	25.3675	25.5148	25.6895	25.4374	25.3961	25.3881	25.4527	25.3679	25.3967	25.5239	25.4072	25.4058	-0.116755
ph_Q9UKY7:190	Q9UKY7	0	0	0	5.22196e-104	3	-0.50743	1	0.998835	KTPQGPPEIY(0.999)S(0.001)DTQFPSLQSTAK	190	Y	55573	CDV3	H41	protein-coding	3q22.1	CDV3 homolog ||| Protein CDV3 homolog	24.1269	24.2278	24.0357	24.148	23.4367	23.5857	23.3576	23.4345	23.9918	23.3563	23.2288	23.4596	23.922	23.7806	23.7258	23.8315	23.5352	23.4925	24.1774	24.0918	23.5112	23.396	23.6741	23.3442	23.8513	23.7787	23.5138	23.9268	23.4714	23.7146	-0.455369
ph_P07947:427	P07947	0	0	0	3.69891e-204	2	-0.0033221	1	0.935307	LIEDNEY(0.065)T(0.935)ARQGAK	427	T	2534 3932 6714 7525	FYN LCK SRC YES1	SLK SYN p59-FYN IMD22 LSK YT16 p56lck pp58lck ASV SRC1 THC6 c-SRC p60-Src HsT441 P61-YES Yes c-yes	protein-coding	6q21!1p35.2!20q11.23!18p11.32	FYN proto-oncogene, Src family tyrosine kinase ||| Tyrosine-protein kinase Fyn ||| LCK proto-oncogene, Src family tyrosine kinase ||| Tyrosine-protein kinase Lck ||| SRC proto-oncogene, non-receptor tyrosine kinase ||| Proto-oncogene tyrosine-protein kinase Src ||| YES proto-oncogene 1, Src family tyrosine kinase ||| Tyrosine-protein kinase Yes	24.2433		23.8679				24.1057			23.1874		23.6861	24.2658	23.9211					24.2433	23.8679	NA	24.1057	23.1874	23.6861	24.0934	NA	NA	24.0556	23.6597	24.0934	-0.39587
ph_Q7Z2W4:299	Q7Z2W4	0	0	0	0.00164134	2	3.9893	1	0.95531	KFT(0.036)Y(0.955)LGS(0.008)QDR	299	Y	56829	ZC3HAV1	ARTD13 FLB6421 PARP13 ZAP ZC3H2 ZC3HDC2	protein-coding	7q34	zinc finger CCCH-type containing, antiviral 1 ||| Zinc finger CCCH-type antiviral protein 1								20.8629			21.3151	20.8243	20.6377	20.4888	20.814	20.7987	20.8424	20.6987	NA	NA	NA	20.8629	NA	21.0697	20.5633	20.8064	20.7705	NA	20.9663	20.7134	NA
ph_Q0VAQ4:95	Q0VAQ4	0	0	0	0.00147674	2	-0.017374	1	0.998881	GS(0.001)EKEEY(0.999)FI	95	Y	57228	SMAGP	hSMAGP	protein-coding	12q13.13	small cell adhesion glycoprotein			20.8222	21.0909		20.9276				20.7694	20.4902					20.9153			NA	20.9566	20.9276	NA	20.7694	20.4902	NA	20.9153	NA	20.9421	20.6298	20.9153	-0.312243
ph_P34741:200	P34741	0	0	0	0.00540252	2	-0.3577	1	0.999636	APTKEFY(1)A	200	Y	6383	SDC2	CD362 HSPG HSPG1 SYND2	protein-coding	8q22.1	syndecan 2 ||| Syndecan-2		20.6029	20.3666	20.6642		20.9264	20.8196	20.4891		20.6159	20.7539		20.1779	20.6173		20.4994		20.771	20.6029	20.5154	20.9264	20.6543	20.6159	20.7539	20.3976	20.4994	20.771	20.6816	20.6747	20.556	-0.00683693
ph_Q9NS23:259	Q9NS23	0	0	0	0.00472975	2	-0.24114	1	1	HGQVY(1)LR	259	Y	11186	RASSF1	123F2 NORE2A RASSF1A RDA32 REH3P21	protein-coding	3p21.31	Ras association domain family member 1 ||| Ras association domain-containing protein 1	19.6678	19.9686		20.0761	20.0977		20.5666								20.6428		17.5507		19.8182	20.0761	20.0977	20.5666	NA	NA	NA	20.6428	17.5507	19.9973	20.5666	19.0967	0.569255
ph_Q9Y2X7:545	Q9Y2X7	0	0	0	1.05796e-17	3	-0.56843	1	0.720789	LQPFHS(0.006)T(0.006)ELEDDAIY(0.721)S(0.268)VHVPAGLYR	545	Y	28964	GIT1	---	protein-coding	17q11.2	GIT ArfGAP 1 ||| ARF GTPase-activating protein GIT1		21.1147	21.236	20.8707	21.4522				20.7695		21.2066		21.2153		20.8943				21.1147	21.0533	21.4522	NA	20.7695	21.2066	21.2153	20.8943	NA	21.2067	20.988	21.0548	-0.218707
ph_Q8IZP0:200	Q8IZP0	0	0	0	1.9554e-53	3	0.17066	1	0.508781	NT(0.044)PY(0.448)KT(0.509)LEPVKPPTVPNDYMTSPAR	200	T	10006	ABI1	ABI-1 ABLBP4 E3B1 NAP1BP SSH3BP SSH3BP1	protein-coding	10p12.1	abl interactor 1			21.3034					20.746	21.0119		20.2469	20.3475		20.5872		20.5597	20.0911	19.8318	NA	21.3034	NA	20.746	21.0119	20.2972	20.5872	20.5597	19.9614	21.3034	20.685	20.3695	-0.618383
ph_Q96J84:647	Q96J84	0	0	0	1.71919e-20	2	1.2737	1	0.875147	LSHS(0.068)S(0.054)GY(0.875)AQLNT(0.001)Y(0.001)SR	647	Y	55243	KIRREL1	KIRREL NEPH1	protein-coding	1q23.1	kirre like nephrin family adhesion molecule 1 ||| Kin of IRRE-like protein 1	22.0496						21.7451					21.7384		21.3966		21.397	21.8182		22.0496	NA	NA	21.7451	NA	21.7384	21.3966	21.397	21.8182	22.0496	21.7418	21.5373	-0.307843
ph_Q9NZM3:553	Q9NZM3	0	0	0	0.0174008	2	-1.4364	---	1	LIY(1)LVPEK	553	Y	50618	ITSN2	PRO2015 SH3D1B SH3P18 SWA SWAP	protein-coding	2p23.3	intersectin 2 ||| Intersectin-2	17.9193	18.669		21.0608	18.8225	19.2425		19.4273	19.0291	19.5971	19.2184	19.4042		18.9357	19.3658	19.3179		19.4946	18.2942	21.0608	19.0325	19.4273	19.3131	19.3113	18.9357	19.3418	19.4946	19.4625	19.3506	19.2574	-0.111896
ph_Q15464:268	Q15464	0	0	0	0	2	-0.044794	1	0.999997	AGKGESAGY(1)MEPYEAQR	268	Y	6461	SHB	bA3J10.2	protein-coding	9p13.1	SH2 domain containing adaptor protein B ||| SH2 domain-containing adapter protein B	24.1161	24.0986	24.2972	23.8986	24.2915	24.1392	24.1146	23.6173	23.9207	23.9065	24.3876	23.7586	24.2563	24.0079	24.2186	23.8965	24.126	23.971	24.1073	24.0979	24.2153	23.8659	23.9136	24.0731	24.1321	24.0576	24.0485	24.1402	23.9509	24.0794	-0.189326
ph_P50552:39	P50552	0	0	0	2.51444e-86	2	-0.0759	1	1	VQIY(1)HNPTANSFR	39	Y	7408	VASP	---	protein-coding	19q13.32	vasodilator stimulated phosphoprotein ||| Vasodilator-stimulated phosphoprotein	21.7984	21.7573	22.0175	21.3647	22.0342	21.7337	21.9396	21.6135	21.9077	21.7699	22.1714	21.748	21.6397	21.7943	21.9404	21.5417	21.9796	21.4846	21.7778	21.6911	21.8839	21.7765	21.8388	21.9597	21.717	21.7411	21.7321	21.7843	21.8583	21.7301	0.0740615
ph_Q9UPS8:296	Q9UPS8	0	0	0	2.40953e-18	2	-0.12294	1	0.935138	NLEAT(0.032)Y(0.935)GT(0.032)VR	296	Y	22852	ANKRD26	THC2 bA145E8.1	protein-coding	10p12.1	ankyrin repeat domain 26 ||| Ankyrin repeat domain-containing protein 26		21.1598	20.7914	20.7238	20.8759	20.6578					20.7845	20.6946	20.8547	20.71			20.652		21.1598	20.7576	20.7669	NA	NA	20.7396	20.7824	NA	20.652	20.8948	20.7396	20.7172	-0.15521
ph_Q9Y314:14	Q9Y314	0	0	0	2.67548e-07	2	-2.4805	1	0.76097	NCTAGAVY(0.761)T(0.202)Y(0.037)HEK	14	Y	51070	NOSIP	CGI-25	protein-coding	19q13.33	nitric oxide synthase interacting protein ||| Nitric oxide synthase-interacting protein	18.8944		19.9059	19.5367					19.5741	19.0159					19.0238	19.0414	18.9235		18.8944	19.7213	NA	NA	19.295	NA	NA	19.0326	18.9235	19.3078	19.295	18.9781	-0.0128457
ph_O60716:174	O60716	0	0	0	7.59926e-68	3	0.28684	1	0.989156	TVQPVAMGPDGLPVDASSVS(0.004)NNY(0.989)IQT(0.006)LGR	174	Y	1500 100528016	CTNND1 TMX2-CTNND1	BCDS2 CAS CTNND P120CAS P120CTN p120 p120(CAS) p120(CTN) CTNND1 p120(cas) p120(ctn)	protein-coding|ncRNA	11q12.1	catenin delta 1 ||| TMX2-CTNND1 readthrough (NMD candidate) ||| Catenin delta-1	20.2181	20.9711	20.364	21.3314	20.6535	21.081	21.0323	20.9	20.3508	20.5829	20.2688				20.0545				20.5946	20.8477	20.8673	20.9661	20.4668	20.2688	NA	20.0545	NA	20.7698	20.5672	20.0545	-0.202603
ph_Q4V321;Q9UEU5:17;16	Q9UEU5;Q4V321	0	0	0	7.73242e-136	4	-0.11678	1	1	RY(1)VEPPEMIGPMRPEQFSDEVEPATPEEGEPATQR	16;17	Y	645051 729447 645037 2574 729408 26749 100101629	GAGE13 GAGE2A GAGE2B GAGE2C GAGE2D GAGE2E GAGE8	GAGE-12A GAGE-13 GAGE12A CT4.2 GAGE-2 GAGE-2A GAGE2 GAGE-2B GAGE-2C CT4.8 GAGE-2D GAGE-8 GAGE8 GAGE-2E	protein-coding	Xp11.23!Xp11	G antigen 13 ||| G antigen 2A ||| G antigen 2B ||| G antigen 2C ||| G antigen 2A ||| G antigen 2B/2C ||| G antigen 2D ||| G antigen 2E ||| G antigen 8	21.8394	22.2794	22.0482	22.3623	21.6711	21.5703	22.1181	22.5572	21.6451	22.073	21.8279	22.1829	21.5654	21.7757	21.7919	22.2924			22.0594	22.2052	21.6207	22.3377	21.8591	22.0054	21.6705	22.0422	NA	21.9618	22.0674	21.8564	0.105603
ph_O15357:1135	O15357	0	0	0	4.49626e-06	2	2.6127	1	0.977001	TLS(0.023)EVDY(0.977)APAGPAR	1135	Y	3636	INPPL1	OPSMD SHIP2	protein-coding	11q13.4	inositol polyphosphate phosphatase like 1 ||| Phosphatidylinositol 3,4,5-trisphosphate 5-phosphatase 2				20.6104			19.2708	18.8304	19.1426	19.2357	19.3481	19.1062	19.0119	19.5709	18.8056	18.955		18.818	NA	20.6104	NA	19.0506	19.1892	19.2272	19.2914	18.8803	18.818	20.6104	19.1557	18.9966	-1.4547
ph_P00519:185	P00519	0	0	0	3.71628e-14	2	1.7661	1	0.999361	LY(0.999)VSSESR	185	Y	25	ABL1	ABL BCR-ABL CHDSKM JTK7 bcr/abl c-ABL c-ABL1 p150 v-abl	protein-coding	9q34.12	ABL proto-oncogene 1, non-receptor tyrosine kinase ||| Tyrosine-protein kinase ABL1	20.821		20.6823	21.083	21.1855				20.9031	20.5095	20.8639	21.0037	20.8828	21.1851	20.4297	20.6029	21.4639	20.728	20.821	20.8827	21.1855	NA	20.7063	20.9338	21.034	20.5163	21.096	20.963	20.8201	20.8821	-0.142981
ph_Q9GZY6:110	Q9GZY6	0	0	0	1.74704e-26	3	0.24582	1	0.995874	HGS(0.004)EEAY(0.996)IDPIAMEYYNWGR	110	Y	7462	LAT2	HSPC046 LAB NTAL WBSCR15 WBSCR5 WSCR5	protein-coding	7q11.23	linker for activation of T cells family member 2 ||| Linker for activation of T-cells family member 2	17.395	17.2632	19.3941	19.7316	19.5346	19.565	17.5164	19.1237	18.4373	18.7293	16.4248			18.5073		18.6792		18.5501	17.3291	19.5629	19.5498	18.3201	18.5833	16.4248	18.5073	18.6792	18.5501	18.8139	17.776	18.5789	-1.03788
ph_P58335:380	P58335	0	0	0	2.06816e-05	2	0.15686	1	0.723552	WPTVDAS(0.152)Y(0.724)Y(0.124)GGR	380	Y	84168 118429	ANTXR1 ANTXR2	ATR GAPO TEM8 CMG-2 CMG2 HFS ISH JHF	protein-coding	2p13.3!4q21.21	ANTXR cell adhesion molecule 1 ||| Anthrax toxin receptor 1 ||| ANTXR cell adhesion molecule 2 ||| Anthrax toxin receptor 2	19.1473		19.0381	19.6633	19.5603					17.3133	17.295	18.4388	19.2601	19.4692			19.4945	18.7747	19.1473	19.3507	19.5603	NA	17.3133	17.8669	19.3646	NA	19.1346	19.3528	17.5901	19.2496	-1.76272
ph_Q9BY89:733	Q9BY89	0	0	0	0.00108997	2	-0.77333	1	1	Y(1)DIVHAVGER	733	Y	85379	KIAA1671	---	protein-coding	22q11.23	KIAA1671 ||| Uncharacterized protein KIAA1671							20.1935		20.6484	20.5631	20.5023	20.1226		20.1392	19.7273	20.3207	20.8464	20.1171	NA	NA	NA	20.1935	20.6058	20.3125	20.1392	20.024	20.4817	NA	20.3706	20.215	NA
ph_Q96GT9;Q9UEU5:9;9	Q9UEU5;Q96GT9	0	0	0	0.00231118	2	2.1224	1	0.99558	S(0.002)T(0.002)Y(0.996)RPRPR	9;9	Y	729447 645037 2574 729408 26749 100101629 9502 170626	GAGE2A GAGE2B GAGE2C GAGE2D GAGE2E GAGE8 XAGE2 XAGE3	CT4.2 GAGE-2 GAGE-2A GAGE2 GAGE-2B GAGE-2C CT4.8 GAGE-2D GAGE-8 GAGE8 GAGE-2E CT12.2 GAGED3 XAGE-2 XAGE2B CT12.3a CT12.3b GAGED4 PLAC6 XAGE-3 pp9012	protein-coding	Xp11.23!Xp11!Xp11.22	G antigen 2A ||| G antigen 2B ||| G antigen 2C ||| G antigen 2A ||| G antigen 2B/2C ||| G antigen 2D ||| G antigen 2E ||| G antigen 8 ||| X antigen family member 2 ||| X antigen family member 3		22.9092		22.0976				22.6495	21.9581	21.8027	22.9713	22.7904	22.0813		22.7471	22.1541	23.0068	22.1959	22.9092	22.0976	NA	22.6495	21.8804	22.8808	22.0813	22.4506	22.6013	22.5034	22.4702	22.3777	-0.0331617
ph_Q9NWQ8:227	Q9NWQ8	0	0	0	5.26957e-131	2	1.1541	1;2	1	AEFAEY(1)AS(1)VDRNKK	227	Y	55824	PAG1	CBP PAG	protein-coding	8q21.13	phosphoprotein membrane anchor with glycosphingolipid microdomains 1 ||| Phosphoprotein associated with glycosphingolipid-enriched microdomains 1	23.8038	23.7278	23.8051	23.6954	23.7494	23.7983	23.2396	23.3506	23.6682	23.7226	23.5469	23.6241	23.6085	23.7217	23.7416	23.7008	23.7668	23.7843	23.7658	23.7503	23.7739	23.2951	23.6954	23.5855	23.6651	23.7212	23.7756	23.7633	23.5253	23.7206	-0.237972
ph_Q13070:17	Q13070	0	0	0	4.08764e-28	4	0.072886	1	0.99935	RY(0.999)VQPPEVIGPMRPEQFS(0.001)DEVEPATPEEGEPATQR	17	Y	2576 2577 2578	GAGE4 GAGE5 GAGE6	CT4.4 CT4.5 CT4.6	protein-coding	Xp11.4-p11.2	G antigen 4 ||| G antigen 5 ||| G antigen 6		21.2938	21.0825	20.92	20.5962	20.4316		20.9705	20.9402	20.0888									21.2938	21.0013	20.5139	20.9705	20.5145	NA	NA	NA	NA	20.9363	20.7425	NA	-0.193786
ph_Q70E73:1226	Q70E73	0	0	0	7.04624e-06	2	0.21551	1	0.632836	AGYGGSHIS(0.184)GY(0.633)AT(0.184)LR	1226	Y	65059	RAPH1	ALS2CR18 ALS2CR9 LPD PREL-2 PREL2 RMO1 RalGDS/AF-6	protein-coding	2q33.2	Ras association (RalGDS/AF-6) and pleckstrin homology domains 1 ||| Ras-associated and pleckstrin homology domains-containing protein 1	19.5406	19.5169				19.8776	19.5652	19.2035	19.2165	19.1724	19.2651	19.523	19.4117	19.7051		19.6851	19.7983	19.0237	19.5287	NA	19.8776	19.3843	19.1944	19.394	19.5584	19.6851	19.411	19.7032	19.3243	19.5515	-0.378887
ph_Q96J84:653	Q96J84	0	0	0	4.53395e-11	3	0.6238	1	0.904442	LSHSSGYAQLNT(0.048)Y(0.904)S(0.048)R	653	Y	55243	KIRREL1	KIRREL NEPH1	protein-coding	1q23.1	kirre like nephrin family adhesion molecule 1 ||| Kin of IRRE-like protein 1			22.8958	22.9259				22.3014		22.1728				22.2184				22.0515	NA	22.9108	NA	22.3014	22.1728	NA	22.2184	NA	22.0515	22.9108	22.2371	22.135	-0.673763
ph_Q07157:1199	Q07157	0	0	0	0.000284263	2	-0.93361	---	0.840407	S(0.16)Y(0.84)EQVPPQGFTSR	1199	Y	7082	TJP1	ZO-1	protein-coding	15q13.1	tight junction protein 1 ||| Tight junction protein ZO-1			19.4621	17.7256	17.9316	19.3853	19.1313							18.7832	18.0624				NA	18.5939	18.6584	19.1313	NA	NA	18.7832	18.0624	NA	18.6262	19.1313	18.4228	0.505176
ph_Q5JTD0:352	Q5JTD0	0	0	0	3.83473e-06	2	-0.90303	1	0.894229	NSPLPNCT(0.053)Y(0.894)AT(0.053)R	352	Y	93643	TJAP1	PILT TJP4	protein-coding	6p21.1	tight junction associated protein 1 ||| Tight junction-associated protein 1			20.06			19.8226			19.7015				19.8195	19.7349		19.7818		19.9351	NA	20.06	19.8226	NA	19.7015	NA	19.7772	19.7818	19.9351	19.9413	19.7015	19.8314	-0.239833
ph_P06733:44	P06733	0	0	0	5.20528e-20	2	-0.0072512	1	0.981997	AAVPSGAS(0.003)T(0.014)GIY(0.982)EALELR	44	Y	2023 2026	ENO1 ENO2	ENO1L1 HEL-S-17 MPB1 NNE PPH HEL-S-279 NSE	protein-coding	1p36.23!12p13.31	enolase 1 ||| Alpha-enolase ||| enolase 2 ||| Gamma-enolase	21.3464					20.2579					20.4988	20.6606		20.3626		20.6385	20.9702	20.605	21.3464	NA	20.2579	NA	NA	20.5797	20.3626	20.6385	20.7876	20.8021	20.5797	20.5962	-0.222453
ph_Q8WXE0:253	Q8WXE0	0	0	0	2.16723e-09	2	-0.78135	1	0.905866	NT(0.074)Y(0.906)NQT(0.02)ALDIVNQFTTSQASR	253	Y	57513	CASKIN2	ANKS5B	protein-coding	17q25.1	CASK interacting protein 2 ||| Caskin-2										18.4867	18.819		18.2138	18.6928	18.6403				NA	NA	NA	NA	18.4867	18.819	18.4533	18.6403	NA	NA	18.6528	18.5468	NA
ph_Q8N3R9:528	Q8N3R9	0	0	0	2.4066e-27	2	-0.046572	1	0.99868	DQEVAGRDY(0.999)HFVS(0.001)R	528	Y	64398	MPP5	PALS1	protein-coding	14q23.3	membrane palmitoylated protein 5 ||| MAGUK p55 subfamily member 5	22.1201	22.2106	22.102	21.989	22.4171	22.5404	22.2474	22.2268	21.76	22.007	22.1001	22.0013	22.1972		22.2603	22.1027	22.2804	22.1337	22.1653	22.0455	22.4788	22.2371	21.8835	22.0507	22.1972	22.1815	22.2071	22.2299	22.0571	22.1953	-0.172774
ph_Q15149:4612	Q15149	0	0	0	1.055e-08	2	0.33272	1	0.670856	GY(0.03)Y(0.671)S(0.154)PY(0.135)S(0.01)VSGSGSTAGSR	4612	Y	5339	PLEC	EBS1 EBSMD EBSND EBSO EBSOG EBSPA HD1 LGMD2Q LGMDR17 PCN PLEC1 PLEC1b PLTN	protein-coding	8q24.3	plectin	19.6529								19.7562			19.3186		19.6411				19.3193	19.6529	NA	NA	NA	19.7562	19.3186	19.6411	NA	19.3193	19.6529	19.5374	19.4802	-0.115533
ph_Q8TBA6:43	Q8TBA6	0	0	0	1.3008e-13	3	-1.0621	1	0.523999	NT(0.01)DY(0.456)T(0.524)ELHQQNT(0.01)DLIYQTGPK	43	T	9950	GOLGA5	GOLIM5 RFG5 ret-II	protein-coding	14q32.12	golgin A5 ||| Golgin subfamily A member 5					20.2634		18.8641	18.4901		18.4029	18.6885	18.737			18.3608	18.376	18.7441	18.7267	NA	NA	20.2634	18.6771	18.4029	18.7127	NA	18.3684	18.7354	20.2634	18.5976	18.5519	-1.66586
ph_P54756:650	P54756	0	0	0	2.40874e-18	3	-0.33011	2	0.603436	T(0.397)Y(0.603)IDPHT(0.397)Y(0.603)EDPNQAVHEFAK	650	Y	2044	EPHA5	CEK7 EHK-1 EHK1 EK7 HEK7 TYRO4	protein-coding	4q13.1-q13.2	EPH receptor A5 ||| Ephrin type-A receptor 5			19.4981		19.2741	18.6774		19.0757		19.6081		19.3898		19.302	19.618	19.9886	18.274	18.6938	NA	19.4981	18.9757	19.0757	19.6081	19.3898	19.302	19.8033	18.4839	19.2369	19.3579	19.1964	0.120983
ph_P54756:656	P54756	0	0	0	2.40874e-18	3	-0.33011	2	0.603436	T(0.397)Y(0.603)IDPHT(0.397)Y(0.603)EDPNQAVHEFAK	656	Y	2044	EPHA5	CEK7 EHK-1 EHK1 EK7 HEK7 TYRO4	protein-coding	4q13.1-q13.2	EPH receptor A5 ||| Ephrin type-A receptor 5			19.4981		19.2741	18.6774		19.0757		19.6081		19.3898		19.302	19.618	19.9886	18.274	18.6938	NA	19.4981	18.9757	19.0757	19.6081	19.3898	19.302	19.8033	18.4839	19.2369	19.3579	19.1964	0.120983
ph_Q99426:98	Q99426	0	0	0	3.71481e-08	2	-0.63681	1	0.999999	LGEY(1)EDVSRVEK	98	Y	1155	TBCB	CG22 CKAP1 CKAPI	protein-coding	19q13.12	tubulin folding cofactor B ||| Tubulin-folding cofactor B	20.7515		20.6514	20.7122	20.3332	20.1809	20.2355	19.8383	20.7199	20.7053	20.5751	20.1789	20.4859	20.4889	20.8256		20.6405	19.9997	20.7515	20.6818	20.2571	20.0369	20.7126	20.377	20.4874	20.8256	20.3201	20.5635	20.3755	20.5444	-0.187929
ph_Q9UPS8:295	Q9UPS8	0	0	0	8.42477e-09	2	-0.74845	1	0.628329	KNLEAT(0.628)Y(0.296)GT(0.075)VR	295	T	22852	ANKRD26	THC2 bA145E8.1	protein-coding	10p12.1	ankyrin repeat domain 26 ||| Ankyrin repeat domain-containing protein 26		23.1636				22.7951									23.1092	23.0355		22.8225	23.1636	NA	22.7951	NA	NA	NA	NA	23.0723	22.8225	22.9794	NA	22.9474	NA
ph_Q8TCZ2:244	Q8TCZ2	0	0	0	3.34541e-35	2	0.84272	1	0.505446	Y(0.406)S(0.505)T(0.088)LHT(0.001)QSAEPPPPPEPARI	244	S	83692	CD99L2	CD99B MIC2L1	protein-coding	Xq28	CD99 molecule like 2 ||| CD99 antigen-like protein 2			20.8345				18.4726	18.1822			19.5498	18.6959	18.9588	18.1065		18.7181	18.7144	18.9123	NA	20.8345	NA	18.3274	NA	19.1228	18.5327	18.7181	18.8134	20.8345	18.7251	18.688	-2.10934
ph_O43353:381	O43353	0	0	0	0.000552052	2	0.35936	1	1	KAQDCY(1)FMK	381	Y	8767	RIPK2	CARD3 CARDIAK CCK GIG30 RICK RIP2	protein-coding	8q21.3	receptor interacting serine/threonine kinase 2 ||| Receptor-interacting serine/threonine-protein kinase 2	20.6484	20.3612	20.1699	20.3029	19.9038	20.0497	20.5201	20.2879	20.6379		20.5341	20.6482				20.3222	20.2478		20.5048	20.2364	19.9767	20.404	20.6379	20.5912	NA	20.3222	20.2478	20.2393	20.5444	20.285	0.305052
ph_P23193:126	P23193	0	0	0	4.52589e-08	3	0.64239	1	0.979793	DT(0.018)Y(0.98)VS(0.002)S(0.001)FPRAPSTSDSVR	126	Y	6917 399511	TCEA1 TCEA1P2	GTF2S SII TCEA TF2S TFIIS	protein-coding|pseudo	8q11.23!3p22.2	transcription elongation factor A1 ||| transcription elongation factor A1 pseudogene 2 ||| Transcription elongation factor A protein 1	18.079		18.5604			18.6747			17.8435	18.0046	17.4547	17.8917	17.9139	19.1646				18.3182	18.079	18.5604	18.6747	NA	17.9241	17.6732	18.5392	NA	18.3182	18.438	17.7986	18.4287	-0.639376
ph_P68363;Q13748;Q71U36;Q9BQE3:103;103;103;103	P68363;Q13748;Q71U36;Q9BQE3	0	0	0	3.66687e-120	3	-0.23946	1	1	QLFHPEQLITGKEDAANNY(1)AR	103;103;103;103	Y	7846 10376 84790 7277	TUBA1A TUBA1B TUBA1C TUBA4A	B-ALPHA-1 LIS3 TUBA3 K-ALPHA-1 TUBA6 bcm948 ALS22 H2-ALPHA TUBA1	protein-coding	12q13.12!2q35	tubulin alpha 1a ||| Tubulin alpha-1A chain ||| tubulin alpha 1b ||| Tubulin alpha-1B chain ||| tubulin alpha 1c ||| Tubulin alpha-1C chain ||| tubulin alpha 4a ||| Tubulin alpha-4A chain	21.2537	21.705	21.606	21.3071	19.8898				20.5881	20.0765			21.1145		20.7181				21.4793	21.4566	19.8898	NA	20.3323	NA	21.1145	20.7181	NA	20.9419	20.3323	20.9163	-0.609595
ph_P05067:757	P05067	0	0	0	6.19946e-05	2	-0.17569	1	0.995395	MQQNGY(0.995)ENPT(0.002)Y(0.002)K	757	Y	351	APP	AAA ABETA ABPP AD1 APPI CTFgamma CVAP PN-II PN2 preA4	protein-coding	21q21.3	amyloid beta precursor protein ||| Amyloid-beta precursor protein	19.4696		19.5324	19.5225			19.3482		19.7668			19.3613							19.4696	19.5274	NA	19.3482	19.7668	19.3613	NA	NA	NA	19.4985	19.4921	NA	-0.00640545
ph_O43491:87	O43491	0	0	0	0.0090071	1	-0.80866	1	0.574376	S(0.574)Y(0.369)T(0.057)LVVAK	87	S	2037	EPB41L2	4.1-G 4.1G	protein-coding	6q23.1-q23.2	erythrocyte membrane protein band 4.1 like 2 ||| Band 4.1-like protein 2	17.5309		18.4652	17.6041		18.0388													17.5309	18.0346	18.0388	NA	NA	NA	NA	NA	NA	17.8681	NA	NA	NA
ph_O43707;P12814:263;244	O43707;P12814	0	0	0	4.1703e-07	3	-0.12549	1	0.513467	AIMT(0.003)Y(0.002)VS(0.031)S(0.513)FY(0.446)HAFS(0.004)GAQK	263;244	S	87 81	ACTN1 ACTN4	BDPLT15 ACTININ-4 FSGS FSGS1	protein-coding	14q24.1!14q22-q24!19q13.2	actinin alpha 1 ||| Alpha-actinin-1 ||| actinin alpha 4 ||| Alpha-actinin-4							20.8393												NA	NA	NA	20.8393	NA	NA	NA	NA	NA	NA	20.8393	NA	NA
ph_O60716:214	O60716	0	0	0	0.00431628	2	-0.16365	1	0.554292	NFHYPPDGY(0.445)S(0.554)R	214	S	1500 100528016	CTNND1 TMX2-CTNND1	BCDS2 CAS CTNND P120CAS P120CTN p120 p120(CAS) p120(CTN) CTNND1 p120(cas) p120(ctn)	protein-coding|ncRNA	11q12.1	catenin delta 1 ||| TMX2-CTNND1 readthrough (NMD candidate) ||| Catenin delta-1				19.8214															NA	19.8214	NA	NA	NA	NA	NA	NA	NA	19.8214	NA	NA	NA
ph_O60716:905	O60716	0	0	0	1.49199e-33	3	-0.0047599	1	0.693445	SLDNNY(0.211)S(0.693)T(0.096)PNERGDHNR	905	S	1500 100528016	CTNND1 TMX2-CTNND1	BCDS2 CAS CTNND P120CAS P120CTN p120 p120(CAS) p120(CTN) CTNND1 p120(cas) p120(ctn)	protein-coding|ncRNA	11q12.1	catenin delta 1 ||| TMX2-CTNND1 readthrough (NMD candidate) ||| Catenin delta-1			25.0808		24.8185														NA	25.0808	24.8185	NA	NA	NA	NA	NA	NA	24.9496	NA	NA	NA
ph_O75815:213	O75815	0	0	0	0.0270336	2	0.93402	1	0.597081	LSEAY(0.403)S(0.597)R	213	S	8412	BCAR3	AND-34 NSP2 SH2D3B	protein-coding	1p22.1	BCAR3 adaptor protein, NSP family member ||| Breast cancer anti-estrogen resistance protein 3						21.9023													NA	NA	21.9023	NA	NA	NA	NA	NA	NA	21.9023	NA	NA	NA
ph_P05155:375	P05155	0	0	0	0.000896945	3	-0.052967	1	0.5	LEDMEQALS(0.5)PS(0.5)VFK	375	S	710	SERPING1	C1IN C1INH C1NH HAE1 HAE2	protein-coding	11q12.1	serpin family G member 1 ||| Plasma protease C1 inhibitor	23.3746	23.4356	23.5508														24.7199		23.4051	23.5508	NA	NA	NA	NA	NA	NA	24.7199	23.4779	NA	24.7199	NA
ph_P05155:377	P05155	0	0	0	0.000896945	3	-0.052967	1	0.5	LEDMEQALS(0.5)PS(0.5)VFK	377	S	710	SERPING1	C1IN C1INH C1NH HAE1 HAE2	protein-coding	11q12.1	serpin family G member 1 ||| Plasma protease C1 inhibitor	23.3746	23.4356	23.5508														24.7199		23.4051	23.5508	NA	NA	NA	NA	NA	NA	24.7199	23.4779	NA	24.7199	NA
ph_P08581:1236	P08581	0	0	0	0	2	0.057537	2	0.997125	DMYDKEY(0.963)Y(0.04)S(0.997)VHNKTGAK	1236	S	4233	MET	AUTS9 DFNB97 HGFR RCCP2 c-Met	protein-coding	7q31.2	MET proto-oncogene, receptor tyrosine kinase ||| Hepatocyte growth factor receptor	23.8708	23.6163	24.3166	23.7703		23.6953													23.7436	24.0435	23.6953	NA	NA	NA	NA	NA	NA	23.8274	NA	NA	NA
ph_P08670:55	P08670	0	0	0	4.71116e-06	2	-1.2674	1	0.810947	SLY(0.004)AS(0.811)S(0.179)PGGVYAT(0.006)R	55	S	7431	VIM	---	protein-coding	10p13	vimentin											20.0816								NA	NA	NA	NA	NA	20.0816	NA	NA	NA	NA	20.0816	NA	NA
ph_P29317:790	P29317	0	0	0	0.00569865	2	0.13287	1	0.56453	WTAPEAIS(0.565)Y(0.435)R	790	S	1969	EPHA2	ARCC2 CTPA CTPP1 CTRCT6 ECK	protein-coding	1p36.13	EPH receptor A2 ||| Ephrin type-A receptor 2										19.0898							19.5498		NA	NA	NA	NA	19.0898	NA	NA	NA	19.5498	NA	19.0898	19.5498	NA
ph_P35568:629	P35568	0	0	0	0.000261041	2	0.40123	1	0.684261	KGS(0.684)GDY(0.316)MPMSPK	629	S	3667	IRS1	HIRS-1	protein-coding	2q36.3	insulin receptor substrate 1							21.6863			21.9018									NA	NA	NA	21.6863	21.9018	NA	NA	NA	NA	NA	21.794	NA	NA
ph_P40189:904	P40189	0	0	0	0.0125937	1	0.47851	1	0.596622	S(0.597)Y(0.403)LPQTVR	904	S	3572	IL6ST	CD130 CDW130 GP130 HIES4 IL-6RB sGP130	protein-coding	5q11.2	interleukin 6 signal transducer ||| Interleukin-6 receptor subunit beta									19.288	19.1622		18.5409							NA	NA	NA	NA	19.2251	18.5409	NA	NA	NA	NA	18.883	NA	NA
ph_P49023:83	P49023	0	0	0	9.36922e-11	2	0.70047	2	0.55412	FIHQQPQS(0.554)S(0.409)S(0.04)PVY(0.786)GS(0.091)S(0.119)AK	83	S	5829	PXN	---	protein-coding	12q24.23	paxillin	21.7602																		21.7602	NA	NA	NA	NA	NA	NA	NA	NA	21.7602	NA	NA	NA
ph_P49023:90	P49023	0	0	0	3.00474e-19	2	-0.24706	1	0.626085	FIHQQPQSSSPVY(0.234)GS(0.626)S(0.139)AK	90	S	5829	PXN	---	protein-coding	12q24.23	paxillin			23.9494																NA	23.9494	NA	NA	NA	NA	NA	NA	NA	23.9494	NA	NA	NA
ph_P49841:215	P49841	0	0	0	4.10761e-120	2	-0.32173	1	0.954483	GEPNVS(0.954)Y(0.046)ICSR	215	S	2931 2932	GSK3A GSK3B	---	protein-coding	19q13.2!3q13.33	glycogen synthase kinase 3 alpha ||| Glycogen synthase kinase-3 alpha ||| glycogen synthase kinase 3 beta ||| Glycogen synthase kinase-3 beta			28.5193					29.0465						29.2423	29.2744		29.3647		NA	28.5193	NA	29.0465	NA	NA	29.2423	29.2744	29.3647	28.5193	29.0465	29.2938	0.527153
ph_Q08357:375	Q08357	0	0	0	0.000189267	3	0.46431	1	0.536564	IHIDRGPEEKPAQES(0.537)NY(0.463)R	375	S	6575	SLC20A2	GLVR-2 GLVR2 IBGC1 IBGC2 IBGC3 MLVAR PIT-2 PIT2 RAM1 Ram-1	protein-coding	8p11.21	solute carrier family 20 member 2 ||| Sodium-dependent phosphate transporter 2									20.3527										NA	NA	NA	NA	20.3527	NA	NA	NA	NA	NA	20.3527	NA	NA
ph_Q13546:389	Q13546	0	0	0	0.000529324	2	0.29209	1	0.54041	LQDEANY(0.007)HLY(0.452)GS(0.54)R	389	S	8737	RIPK1	IMD57 RIP RIP-1 RIP1	protein-coding	6p25.2	receptor interacting serine/threonine kinase 1 ||| Receptor-interacting serine/threonine-protein kinase 1																		20.772	NA	NA	NA	NA	NA	NA	NA	NA	20.772	NA	NA	20.772	NA
ph_Q15464:247	Q15464	0	0	0	5.88283e-11	3	1.1485	1	0.513859	DKVT(0.04)IADDY(0.447)S(0.514)DPFDAKNDLK	247	S	6461	SHB	bA3J10.2	protein-coding	9p13.1	SH2 domain containing adaptor protein B ||| SH2 domain-containing adapter protein B								21.6981											NA	NA	NA	21.6981	NA	NA	NA	NA	NA	NA	21.6981	NA	NA
ph_Q16513:636	Q16513	0	0	0	1.79137e-44	3	0.30347	1	0.559869	SQSEYKPDT(0.023)PQS(0.243)GLEY(0.175)S(0.56)GIQELEDRR	636	S	5586	PKN2	PAK2 PRK2 PRKCL2 PRO2042 Pak-2 STK7	protein-coding	1p22.2	protein kinase N2 ||| Serine/threonine-protein kinase N2	21.8393																		21.8393	NA	NA	NA	NA	NA	NA	NA	NA	21.8393	NA	NA	NA
ph_Q63HR2:481	Q63HR2	0	0	0	1.50914e-67	2	0.55264	1	0.860482	GPLDGS(0.86)PY(0.14)AQVQRPPR	481	S	23371	TNS2	C1-TEN C1TEN TENC1	protein-coding	12q13.13	tensin 2 ||| Tensin-2		22.2578				22.5603													22.2578	NA	22.5603	NA	NA	NA	NA	NA	NA	22.4091	NA	NA	NA
ph_Q6XZF7:1478	Q6XZF7	0	0	0	4.55931e-07	3	-0.20309	1	0.625202	NFRHPEIVGY(0.375)S(0.625)VPGR	1478	S	23268	DNMBP	ARHGEF36 CTRCT48 TUBA	protein-coding	10q24.2	dynamin binding protein ||| Dynamin-binding protein		20.4631																	20.4631	NA	NA	NA	NA	NA	NA	NA	NA	20.4631	NA	NA	NA
ph_Q7Z7M9:97	Q7Z7M9	0	0	0	0.00189733	2	1.3423	2	1	ENVRKT(1)EES(1)VLK	97	S	11227	GALNT5	GALNAC-T5 GALNACT5	protein-coding	2q24.1	polypeptide N-acetylgalactosaminyltransferase 5							25.3884					20.7686							NA	NA	NA	25.3884	NA	20.7686	NA	NA	NA	NA	23.0785	NA	NA
ph_Q86X29:365	Q86X29	0	0	0	2.48815e-12	2	0.25253	1	0.695512	S(0.138)S(0.138)S(0.696)AGGQGS(0.005)Y(0.024)VPLLR	365	S	51599	LSR	ILDR3 LISCH7	protein-coding	19q13.12	lipolysis stimulated lipoprotein receptor ||| Lipolysis-stimulated lipoprotein receptor																21.8362			NA	NA	NA	NA	NA	NA	NA	21.8362	NA	NA	NA	21.8362	NA
ph_Q86X29:371	Q86X29	0	0	0	3.72374e-09	3	0.24752	1	0.52111	S(0.002)S(0.002)S(0.002)AGGQGS(0.521)Y(0.469)VPLLRDT(0.002)DS(0.001)S(0.001)VASEVR	371	S	51599	LSR	ILDR3 LISCH7	protein-coding	19q13.12	lipolysis stimulated lipoprotein receptor ||| Lipolysis-stimulated lipoprotein receptor										20.424									NA	NA	NA	NA	20.424	NA	NA	NA	NA	NA	20.424	NA	NA
ph_Q8IZP0:216	Q8IZP0	0	0	0	2.19251e-25	2	-0.19339	1	0.509495	TLEPVKPPT(0.031)VPNDY(0.101)MT(0.358)S(0.509)PAR	216	S	10006	ABI1	ABI-1 ABLBP4 E3B1 NAP1BP SSH3BP SSH3BP1	protein-coding	10p12.1	abl interactor 1														21.7207					NA	NA	NA	NA	NA	NA	21.7207	NA	NA	NA	NA	21.7207	NA
ph_Q8TEW0:715	Q8TEW0	0	0	0	8.42848e-08	3	0.21027	2	0.754929	RIS(0.755)HS(0.331)LY(0.824)S(0.09)GIEGLDESPSR	715	S	56288	PARD3	ASIP Baz PAR3 PAR3alpha PARD-3 PARD3A PPP1R118 SE2-5L16 SE2-5LT1 SE2-5T2	protein-coding	10p11.22-p11.21	par-3 family cell polarity regulator ||| Partitioning defective 3 homolog			19.0686		19.8642							19.4663		19.4246					NA	19.0686	19.8642	NA	NA	19.4663	19.4246	NA	NA	19.4664	19.4663	19.4246	-0.000140373
ph_Q8TEW0:717	Q8TEW0	0	0	0	3.67359e-10	3	0.20414	2	0.637467	RIS(0.545)HS(0.637)LY(0.741)S(0.076)GIEGLDESPSR	717	S	56288	PARD3	ASIP Baz PAR3 PAR3alpha PARD-3 PARD3A PPP1R118 SE2-5L16 SE2-5LT1 SE2-5T2	protein-coding	10p11.22-p11.21	par-3 family cell polarity regulator ||| Partitioning defective 3 homolog					19.8642							19.4663		19.4246					NA	NA	19.8642	NA	NA	19.4663	19.4246	NA	NA	19.8642	19.4663	19.4246	-0.397928
ph_Q8TEW0:720	Q8TEW0	0	0	0	7.20367e-12	2	0.59532	1	0.53033	IS(0.005)HS(0.005)LY(0.459)S(0.53)GIEGLDESPSR	720	S	56288	PARD3	ASIP Baz PAR3 PAR3alpha PARD-3 PARD3A PPP1R118 SE2-5L16 SE2-5LT1 SE2-5T2	protein-coding	10p11.22-p11.21	par-3 family cell polarity regulator ||| Partitioning defective 3 homolog	19.5418																		19.5418	NA	NA	NA	NA	NA	NA	NA	NA	19.5418	NA	NA	NA
ph_Q96J84:743	Q96J84	0	0	0	3.59823e-06	2	0.23264	1	0.558946	FSYTSQHS(0.559)DY(0.441)GQR	743	S	55243	KIRREL1	KIRREL NEPH1	protein-coding	1q23.1	kirre like nephrin family adhesion molecule 1 ||| Kin of IRRE-like protein 1				20.854															NA	20.854	NA	NA	NA	NA	NA	NA	NA	20.854	NA	NA	NA
ph_Q96RT1:1106	Q96RT1	0	0	0	1.7573e-51	3	-0.27754	1	0.930664	AQIPEGDY(0.054)LS(0.931)Y(0.011)REFHS(0.005)AGR	1106	S	55914	ERBIN	ERBB2IP HEL-S-78 LAP2	protein-coding	5q12.3	erbb2 interacting protein ||| Erbin		23.9781	23.8245	23.7266								22.4651					22.2879		23.9781	23.7755	NA	NA	NA	22.4651	NA	NA	22.2879	23.8768	22.4651	22.2879	-1.41172
ph_Q99569:223	Q99569	0	0	0	3.0058e-07	2	-0.52865	1	0.530898	AQS(0.007)PS(0.531)Y(0.45)VIS(0.009)T(0.003)GVSPSR	223	S	8502	PKP4	p0071	protein-coding	2q24.1	plakophilin 4 ||| Plakophilin-4	18.9444																		18.9444	NA	NA	NA	NA	NA	NA	NA	NA	18.9444	NA	NA	NA
ph_Q99704:450	Q99704	0	0	0	4.80911e-05	2	0.27135	1	0.563546	SHNSALY(0.436)S(0.564)QVQK	450	S	1796	DOK1	P62DOK pp62	protein-coding	2p13.1	docking protein 1										21.0986						20.7463			NA	NA	NA	NA	21.0986	NA	NA	20.7463	NA	NA	21.0986	20.7463	NA
ph_Q9C0B5:537	Q9C0B5	0	0	0	2.11521e-45	3	-0.3403	2	0.910612	LVPT(0.003)GPT(0.003)HREPS(0.993)PVRY(0.09)DNLS(0.911)R	537	S	25921	ZDHHC5	DHHC5 ZNF375	protein-coding	11q12.1	zinc finger DHHC-type palmitoyltransferase 5 ||| Palmitoyltransferase ZDHHC5			26.2123													24.6154			NA	26.2123	NA	NA	NA	NA	NA	24.6154	NA	26.2123	NA	24.6154	NA
ph_Q9H6R4:35	Q9H6R4	0	0	0	0.016948	2	1.9394	---	0.961669	EGKKAS(0.962)S(0.038)R	35	S	65083	NOL6	NRAP UTP22 bA311H10.1	protein-coding	9p13.3	nucleolar protein 6					18.524									19.0509					NA	NA	18.524	NA	NA	NA	19.0509	NA	NA	18.524	NA	19.0509	NA
ph_Q9HAU0:435	Q9HAU0	0	0	0	2.30651e-07	2	-0.19463	1	0.605663	GVIS(0.606)Y(0.393)QT(0.001)LPR	435	S	54477	PLEKHA5	PEPP-2 PEPP2	protein-coding	12p12.3	pleckstrin homology domain containing A5 ||| Pleckstrin homology domain-containing family A member 5	21.1965																		21.1965	NA	NA	NA	NA	NA	NA	NA	NA	21.1965	NA	NA	NA
ph_Q9HAZ1:95	Q9HAZ1	0	0	0	0.0022254	3	-0.93636	1	0.555354	HY(0.001)HRDIES(0.555)GY(0.443)R	95	S	57396	CLK4	---	protein-coding	5q35.3	CDC like kinase 4 ||| Dual specificity protein kinase CLK4						16.9344		22.3376	15.9362		22.2048				22.4326				NA	NA	16.9344	22.3376	15.9362	22.2048	NA	22.4326	NA	16.9344	20.1596	22.4326	3.22511
ph_Q9NRY4:1106	Q9NRY4	0	0	0	7.78014e-10	2	-0.077248	1	0.543529	NEEENIY(0.456)S(0.544)VPHDSTQGK	1106	S	2909	ARHGAP35	GRF-1 GRLF1 P190-A P190A p190ARhoGAP p190RhoGAP	protein-coding	19q13.32	Rho GTPase activating protein 35 ||| Rho GTPase-activating protein 35														23.0725					NA	NA	NA	NA	NA	NA	23.0725	NA	NA	NA	NA	23.0725	NA
ph_Q9Y5S2:1640	Q9Y5S2	0	0	0	4.8902e-29	3	0.23767	1	0.573999	NKPY(0.423)IS(0.574)WPS(0.002)S(0.001)GGSEPSVTVPLR	1640	S	9578	CDC42BPB	MRCKB	protein-coding	14q32.32	CDC42 binding protein kinase beta ||| Serine/threonine-protein kinase MRCK beta	20.3113	20.4164	20.093	20.5884									18.0094						20.3639	20.3407	NA	NA	NA	NA	18.0094	NA	NA	20.3523	NA	18.0094	NA
ph_P00519;P42684:392;438	P00519;P42684	0	0	0	3.4632e-08	2	-0.86114	1	0.558245	LMT(0.009)GDT(0.558)Y(0.336)T(0.097)AHAGAK	392;438	T	25 27	ABL1 ABL2	ABL BCR-ABL CHDSKM JTK7 bcr/abl c-ABL c-ABL1 p150 v-abl ABLL ARG	protein-coding	9q34.12!1q25.2	ABL proto-oncogene 1, non-receptor tyrosine kinase ||| Tyrosine-protein kinase ABL1 ||| ABL proto-oncogene 2, non-receptor tyrosine kinase ||| Tyrosine-protein kinase ABL2			20.018																NA	20.018	NA	NA	NA	NA	NA	NA	NA	20.018	NA	NA	NA
ph_P02786:21	P02786	0	0	0	0.00013117	2	0.5282	1	0.528309	SAFS(0.001)NLFGGEPLS(0.115)Y(0.356)T(0.528)R	21	T	7037	TFRC	CD71 IMD46 T9 TFR TFR1 TR TRFR p90	protein-coding	3q29	transferrin receptor ||| Transferrin receptor protein 1			18.3419																NA	18.3419	NA	NA	NA	NA	NA	NA	NA	18.3419	NA	NA	NA
ph_P04626:875	P04626	0	0	0	3.32171e-07	3	0.43777	1	0.536196	LLDIDET(0.536)EY(0.464)HADGGKVPIK	875	T	2064	ERBB2	CD340 HER-2 HER-2/neu HER2 MLN-19 NEU NGL TKR1	protein-coding	17q12	erb-b2 receptor tyrosine kinase 2 ||| Receptor tyrosine-protein kinase erbB-2									21.5093		21.5918								NA	NA	NA	NA	21.5093	21.5918	NA	NA	NA	NA	21.5506	NA	NA
ph_P08581:1006	P08581	0	0	0	2.32321e-36	3	-0.63835	1	0.501609	SVSPTTEMVS(0.013)NES(0.041)VDY(0.444)RAT(0.502)FPEDQFPNSSQNGSCR	1006	T	4233	MET	AUTS9 DFNB97 HGFR RCCP2 c-Met	protein-coding	7q31.2	MET proto-oncogene, receptor tyrosine kinase ||| Hepatocyte growth factor receptor			21.2647				19.8838		19.0537										NA	21.2647	NA	19.8838	19.0537	NA	NA	NA	NA	21.2647	19.4688	NA	-1.79594
ph_P20929:37	P20929	0	0	0	0.00676985	2	1.5488	2	0.835734	IY(0.006)ET(0.386)T(0.386)T(0.386)T(0.836)R	37	T	4703	NEB	NEB177D NEM2	protein-coding	2q23.3	nebulin					23.1168														NA	NA	23.1168	NA	NA	NA	NA	NA	NA	23.1168	NA	NA	NA
ph_P22681:698	P22681	0	0	0	6.98667e-27	4	-0.029042	1	0.510247	LPPGEQCEGEEDT(0.51)EY(0.458)MT(0.024)PS(0.004)S(0.004)RPLRPLDTSQSSR	698	T	867	CBL	C-CBL CBL2 FRA11B NSLL RNF55	protein-coding	11q23.3	Cbl proto-oncogene ||| E3 ubiquitin-protein ligase CBL				23.8661															NA	23.8661	NA	NA	NA	NA	NA	NA	NA	23.8661	NA	NA	NA
ph_P29317:593	P29317	0	0	0	1.65339e-59	4	-0.12654	1;2	0.627436	SEQLKPLKT(0.223)Y(0.777)VDPHT(0.627)Y(0.373)EDPNQAVLK	593	T	1969	EPHA2	ARCC2 CTPA CTPP1 CTRCT6 ECK	protein-coding	1p36.13	EPH receptor A2 ||| Ephrin type-A receptor 2			25.5394												27.1499	25.2186	24.9476		NA	25.5394	NA	NA	NA	NA	NA	26.1842	24.9476	25.5394	NA	25.5659	NA
ph_P54756:649	P54756	0	0	0	2.40874e-18	3	-0.17331	2	0.529729	T(0.53)Y(0.47)IDPHT(0.53)Y(0.47)EDPNQAVHEFAK	649	T	2044	EPHA5	CEK7 EHK-1 EHK1 EK7 HEK7 TYRO4	protein-coding	4q13.1-q13.2	EPH receptor A5 ||| Ephrin type-A receptor 5									19.5625										NA	NA	NA	NA	19.5625	NA	NA	NA	NA	NA	19.5625	NA	NA
ph_P54756:655	P54756	0	0	0	2.40874e-18	3	-0.17331	2	0.529729	T(0.53)Y(0.47)IDPHT(0.53)Y(0.47)EDPNQAVHEFAK	655	T	2044	EPHA5	CEK7 EHK-1 EHK1 EK7 HEK7 TYRO4	protein-coding	4q13.1-q13.2	EPH receptor A5 ||| Ephrin type-A receptor 5									19.5625										NA	NA	NA	NA	19.5625	NA	NA	NA	NA	NA	19.5625	NA	NA
ph_P54756:835	P54756	0	0	0	2.14174e-85	2	-0.37935	1	0.675537	VLEDDPEAAY(0.007)T(0.318)T(0.676)R	835	T	2042 2043 2044	EPHA3 EPHA4 EPHA5	EK4 ETK ETK1 HEK HEK4 TYRO4 EK8 HEK8 SEK TYRO1 CEK7 EHK-1 EHK1 EK7 HEK7	protein-coding	3p11.1!2q36.1!4q13.1-q13.2	EPH receptor A3 ||| Ephrin type-A receptor 3 ||| EPH receptor A4 ||| Ephrin type-A receptor 4 ||| EPH receptor A5 ||| Ephrin type-A receptor 5				24.1851							24.6835		25.0021		24.834				NA	24.1851	NA	NA	NA	24.6835	25.0021	24.834	NA	24.1851	24.6835	24.9181	0.498422
ph_Q03135:15	Q03135	0	0	0	5.62127e-35	3	0.098995	1	0.58136	YVDSEGHLY(0.418)T(0.581)VPIREQGNIYKPNNK	15	T	857	CAV1	BSCL3 CGL3 LCCNS MSTP085 PPH3 VIP21	protein-coding	7q31.2	caveolin 1 ||| Caveolin-1		22.2885																	22.2885	NA	NA	NA	NA	NA	NA	NA	NA	22.2885	NA	NA	NA
ph_Q06124:547	Q06124	0	0	0	1.53226e-06	2	-0.29448	1	0.71052	KGHEY(0.289)T(0.711)NIK	547	T	5781	PTPN11	BPTP3 CFC JMML METCDS NS1 PTP-1D PTP2C SH-PTP2 SH-PTP3 SHP2	protein-coding	12q24.13	protein tyrosine phosphatase non-receptor type 11 ||| Tyrosine-protein phosphatase non-receptor type 11					21.3024	21.3447						21.5397		21.9324			22.1499		NA	NA	21.3236	NA	NA	21.5397	21.9324	NA	22.1499	21.3236	21.5397	22.0412	0.216128
ph_Q13480:316	Q13480	0	0	0	6.4747e-26	3	0.5247	1	0.544571	HVSISYDIPPT(0.002)PGNT(0.545)Y(0.454)QIPR	316	T	2549	GAB1	DFNB26	protein-coding	4q31.21	GRB2 associated binding protein 1 ||| GRB2-associated-binding protein 1					20.3725														NA	NA	20.3725	NA	NA	NA	NA	NA	NA	20.3725	NA	NA	NA
ph_Q5JU85:1128	Q5JU85	0	0	0	1.12854e-54	2	0.079113	1	0.978559	SSLEDT(0.979)Y(0.021)GAGDGLKR	1128	T	23096	IQSEC2	BRAG1 IQ-ArfGEF MRX1 MRX18 MRX78	protein-coding	Xp11.22	IQ motif and Sec7 domain ArfGEF 2 ||| IQ motif and SEC7 domain-containing protein 2			21.505						20.9396										NA	21.505	NA	NA	20.9396	NA	NA	NA	NA	21.505	20.9396	NA	-0.565365
ph_Q7Z7M9:94	Q7Z7M9	0	0	0	0.00189733	2	1.3423	2	1	ENVRKT(1)EES(1)VLK	94	T	11227	GALNT5	GALNAC-T5 GALNACT5	protein-coding	2q24.1	polypeptide N-acetylgalactosaminyltransferase 5							25.3884					20.7686							NA	NA	NA	25.3884	NA	20.7686	NA	NA	NA	NA	23.0785	NA	NA
ph_Q86SQ4:1171	Q86SQ4	0	0	0	1.53582e-18	2	-0.10747	1	0.548794	SLSSSSIGS(0.001)NS(0.122)T(0.549)Y(0.304)LT(0.019)S(0.005)K	1171	T	57211	ADGRG6	APG1 DREG GPR126 LCCS9 PR126 PS1TP2 VIGR	protein-coding	6q24.2	adhesion G-protein-coupled receptor G6 ||| Adhesion G-protein coupled receptor G6																		21.0874	NA	NA	NA	NA	NA	NA	NA	NA	21.0874	NA	NA	21.0874	NA
ph_Q8IWW6:230	Q8IWW6	0	0	0	7.97652e-21	3	-0.29569	3	0.500123	AT(0.5)T(0.5)PPNQGRPDS(1)PVY(1)ANLQELK	230	T	94134	ARHGAP12	---	protein-coding	10p11.22	Rho GTPase activating protein 12 ||| Rho GTPase-activating protein 12			21.6837								19.2585								NA	21.6837	NA	NA	NA	19.2585	NA	NA	NA	21.6837	19.2585	NA	-2.4252
ph_Q8IWW6:231	Q8IWW6	0	0	0	7.97652e-21	3	-0.29569	3	0.500123	AT(0.5)T(0.5)PPNQGRPDS(1)PVY(1)ANLQELK	231	T	94134	ARHGAP12	---	protein-coding	10p11.22	Rho GTPase activating protein 12 ||| Rho GTPase-activating protein 12			21.6837								19.2585								NA	21.6837	NA	NA	NA	19.2585	NA	NA	NA	21.6837	19.2585	NA	-2.4252
ph_Q8IZP0:215	Q8IZP0	0	0	0	4.70302e-42	3	0.81111	1;2	0.502122	NT(0.155)PY(0.388)KT(0.457)LEPVKPPT(0.017)VPNDY(0.308)MT(0.502)S(0.172)PAR	215	T	10006	ABI1	ABI-1 ABLBP4 E3B1 NAP1BP SSH3BP SSH3BP1	protein-coding	10p12.1	abl interactor 1		22.1957		22.2473															22.1957	22.2473	NA	NA	NA	NA	NA	NA	NA	22.2215	NA	NA	NA
ph_Q8N8Z6:602	Q8N8Z6	0	0	0	4.91282e-07	3	0.052634	1	0.525638	AGRHEYALPLAPPEPEY(0.474)AT(0.526)PIVER	602	T	285761	DCBLD1	dJ94G16.1	protein-coding	6q22.1	discoidin, CUB and LCCL domain containing 1 ||| Discoidin, CUB and LCCL domain-containing protein 1	20.4023																		20.4023	NA	NA	NA	NA	NA	NA	NA	NA	20.4023	NA	NA	NA
ph_Q92536:12	Q92536	0	0	0	2.51121e-117	3	0.11296	1	0.521398	EPGRPT(0.029)PT(0.521)Y(0.45)HLVPNTSQSQVEEDVSSPPQR	12	T	9057	SLC7A6	LAT-2 LAT3 y+LAT-2	protein-coding	16q22.1	solute carrier family 7 member 6 ||| Y+L amino acid transporter 2						21.4278													NA	NA	21.4278	NA	NA	NA	NA	NA	NA	21.4278	NA	NA	NA
ph_Q96PD2:717	Q96PD2	0	0	0	9.63912e-44	2	-1.4615	1	0.596584	ATGNQPPPLVGT(0.075)Y(0.289)NT(0.597)LLS(0.04)R	717	T	131566	DCBLD2	CLCP1 ESDN	protein-coding	3q12.1|3	discoidin, CUB and LCCL domain containing 2 ||| Discoidin, CUB and LCCL domain-containing protein 2				21.4628															NA	21.4628	NA	NA	NA	NA	NA	NA	NA	21.4628	NA	NA	NA
ph_Q96PD2:611	Q96PD2	0	0	0	8.11102e-31	3	0.37021	1	0.710257	EVT(0.71)T(0.242)VLQADS(0.025)AEY(0.023)AQPLVGGIVGTLHQR	611	T	131566	DCBLD2	CLCP1 ESDN	protein-coding	3q12.1|3	discoidin, CUB and LCCL domain containing 2 ||| Discoidin, CUB and LCCL domain-containing protein 2										19.7224		20.0822							NA	NA	NA	NA	19.7224	20.0822	NA	NA	NA	NA	19.9023	NA	NA
ph_Q96PD2:564	Q96PD2	0	0	0	9.51869e-05	2	0.032665	1	0.543005	KT(0.004)EGT(0.543)Y(0.45)DLPY(0.003)WDR	564	T	131566	DCBLD2	CLCP1 ESDN	protein-coding	3q12.1|3	discoidin, CUB and LCCL domain containing 2 ||| Discoidin, CUB and LCCL domain-containing protein 2							20.7638												NA	NA	NA	20.7638	NA	NA	NA	NA	NA	NA	20.7638	NA	NA
ph_Q99569:1166	Q99569	0	0	0	2.52865e-52	3	-0.18815	1	0.707288	STT(0.707)NY(0.292)VDFYSTKRPSYR	1166	T	8502	PKP4	p0071	protein-coding	2q24.1	plakophilin 4 ||| Plakophilin-4			22.4769																NA	22.4769	NA	NA	NA	NA	NA	NA	NA	22.4769	NA	NA	NA
ph_Q99959:118	Q99959	0	0	0	0.000196115	2	1.363	1	0.550767	AGT(0.001)T(0.003)AT(0.551)Y(0.446)EGRWGR	118	T	5318	PKP2	ARVD9	protein-coding	12p11.21	plakophilin 2 ||| Plakophilin-2	19.7211	19.4706	20.3658		19.7055	19.569		18.5866											19.5959	20.3658	19.6373	18.5866	NA	NA	NA	NA	NA	19.8663	18.5866	NA	-1.2797
ph_Q99959:107	Q99959	0	0	0	0.00674276	2	-0.8205	1	0.568335	SPVPKT(0.568)Y(0.432)DMLK	107	T	5318	PKP2	ARVD9	protein-coding	12p11.21	plakophilin 2 ||| Plakophilin-2		21.2317				20.8585													21.2317	NA	20.8585	NA	NA	NA	NA	NA	NA	21.0451	NA	NA	NA
ph_Q9BSJ8:824	Q9BSJ8	0	0	0	3.32543e-13	2	-0.1169	1	0.509209	HLS(0.008)PY(0.442)AT(0.509)LT(0.038)VGDS(0.001)S(0.001)HK	824	T	23344	ESYT1	FAM62A MBC2	protein-coding	12q13.2	extended synaptotagmin 1 ||| Extended synaptotagmin-1																		20.5076	NA	NA	NA	NA	NA	NA	NA	NA	20.5076	NA	NA	20.5076	NA
ph_Q9C0B5:521	Q9C0B5	0	0	0	5.6107e-30	3	-0.17151	2	0.706788	LVPT(0.707)GPT(0.141)HREPS(0.172)PVRY(0.978)DNLS(0.003)R	521	T	25921	ZDHHC5	DHHC5 ZNF375	protein-coding	11q12.1	zinc finger DHHC-type palmitoyltransferase 5 ||| Palmitoyltransferase ZDHHC5																		24.6559	NA	NA	NA	NA	NA	NA	NA	NA	24.6559	NA	NA	24.6559	NA
ph_Q9C0B5:524	Q9C0B5	0	0	0	8.27177e-21	4	-0.47794	2	0.893986	LVPT(0.018)GPT(0.894)HREPS(0.156)PVRY(0.883)DNLS(0.048)R	524	T	25921	ZDHHC5	DHHC5 ZNF375	protein-coding	11q12.1	zinc finger DHHC-type palmitoyltransferase 5 ||| Palmitoyltransferase ZDHHC5											24.3074	24.1302			23.8184			23.5369	NA	NA	NA	NA	NA	24.2188	NA	23.8184	23.5369	NA	24.2188	23.6776	NA
ph_Q9GZY6:57	Q9GZY6	0	0	0	1.94495e-08	3	-0.0070391	1	0.51501	T(0.515)Y(0.447)S(0.038)LVGQAWPGPLADMAPTRK	57	T	7462	LAT2	HSPC046 LAB NTAL WBSCR15 WBSCR5 WSCR5	protein-coding	7q11.23	linker for activation of T cells family member 2 ||| Linker for activation of T-cells family member 2			18.7647																NA	18.7647	NA	NA	NA	NA	NA	NA	NA	18.7647	NA	NA	NA
ph_Q9H7B2:262	Q9H7B2	0	0	0	1.40173e-08	2	0.81766	1	0.517467	NISHDT(0.001)FGT(0.11)T(0.517)Y(0.372)GR	262	T	84154	RPF2	BXDC1 bA397G5.4	protein-coding	6q21	ribosome production factor 2 homolog			20.0466						20.0602		20.1571								NA	20.0466	NA	NA	20.0602	20.1571	NA	NA	NA	20.0466	20.1086	NA	0.0620884
ph_Q9UPS8:298	Q9UPS8	0	0	0	0.00102173	2	-1.1206	1	0.509457	NLEAT(0.098)Y(0.393)GT(0.509)VR	298	T	22852	ANKRD26	THC2 bA145E8.1	protein-coding	10p12.1	ankyrin repeat domain 26 ||| Ankyrin repeat domain-containing protein 26																20.7165			NA	NA	NA	NA	NA	NA	NA	20.7165	NA	NA	NA	20.7165	NA
ph_Q9Y446:178	Q9Y446	0	0	0	1.87006e-06	2	-0.71887	1	0.633057	GGVGSRADY(0.357)DT(0.633)LS(0.01)LR	178	T	11187	PKP3	---	protein-coding	11p15.5	plakophilin 3 ||| Plakophilin-3				20.889															NA	20.889	NA	NA	NA	NA	NA	NA	NA	20.889	NA	NA	NA
ph_A7MBM2:102	A7MBM2	0	0	0	1.3015e-10	2	-0.60564	1	0.994778	ALQEY(0.995)QGGS(0.004)S(0.001)LPGLGDR	102	Y	85455	DISP2	C15orf36 DISPB HsT16908 LINC00594	protein-coding	15q15.1	dispatched RND transporter family member 2 ||| Protein dispatched homolog 2			19.0351					18.8042											NA	19.0351	NA	18.8042	NA	NA	NA	NA	NA	19.0351	18.8042	NA	-0.230849
ph_O00459:464	O00459	0	0	0	0.000363835	2	0.29736	1	0.980153	EY(0.001)DQLY(0.98)EEY(0.016)T(0.003)R	464	Y	5296	PIK3R2	MPPH MPPH1 P85B p85 p85-BETA	protein-coding	19p13.11	phosphoinositide-3-kinase regulatory subunit 2 ||| Phosphatidylinositol 3-kinase regulatory subunit beta								19.1358	19.4812						19.9186				NA	NA	NA	19.1358	19.4812	NA	NA	19.9186	NA	NA	19.3085	19.9186	NA
ph_O14974:496	O14974	0	0	0	0.00109599	2	0.27632	1	0.994143	LAY(0.994)VAPT(0.006)IPR	496	Y	4659	PPP1R12A	M130 MBS MYPT1	protein-coding	12q21.2-q21.31	protein phosphatase 1 regulatory subunit 12A								17.4188	18.8794										NA	NA	NA	17.4188	18.8794	NA	NA	NA	NA	NA	18.1491	NA	NA
ph_O43164:42	O43164	0	0	0	5.1633e-05	3	-0.14934	1	0.992669	HAY(0.993)VS(0.007)FKPCMTR	42	Y	9867	PJA2	Neurodap1 RNF131	protein-coding	5q21.3	praja ring finger ubiquitin ligase 2 ||| E3 ubiquitin-protein ligase Praja-2		20.7056	20.4441	20.1329					19.9265									19.4267	20.7056	20.2885	NA	NA	19.9265	NA	NA	NA	19.4267	20.4971	19.9265	19.4267	-0.570545
ph_O60716:280	O60716	0	0	0	5.32946e-07	2	-0.74894	1	1	FHPEPY(1)GLEDDQR	280	Y	1500 100528016	CTNND1 TMX2-CTNND1	BCDS2 CAS CTNND P120CAS P120CTN p120 p120(CAS) p120(CTN) CTNND1 p120(cas) p120(ctn)	protein-coding|ncRNA	11q12.1	catenin delta 1 ||| TMX2-CTNND1 readthrough (NMD candidate) ||| Catenin delta-1									19.871									19.603	NA	NA	NA	NA	19.871	NA	NA	NA	19.603	NA	19.871	19.603	NA
ph_O60716:241	O60716	0	0	0	6.67504e-05	2	0.40709	1	0.999438	Y(0.999)RPSMEGYR	241	Y	1500 100528016	CTNND1 TMX2-CTNND1	BCDS2 CAS CTNND P120CAS P120CTN p120 p120(CAS) p120(CTN) CTNND1 p120(cas) p120(ctn)	protein-coding|ncRNA	11q12.1	catenin delta 1 ||| TMX2-CTNND1 readthrough (NMD candidate) ||| Catenin delta-1			21.7498		21.3693														NA	21.7498	21.3693	NA	NA	NA	NA	NA	NA	21.5596	NA	NA	NA
ph_O60784:386	O60784	0	0	0	1.54509e-06	3	-0.30665	1	0.963868	KEVKY(0.964)EAPQAT(0.036)DGLAGALDAR	386	Y	10043	TOM1	---	protein-coding	22q12.3	target of myb1 membrane trafficking protein ||| Target of Myb protein 1			19.8372				18.5357	18.4954		18.2168	18.8709	18.4975				18.3216			NA	19.8372	NA	18.5155	18.2168	18.6842	NA	18.3216	NA	19.8372	18.4722	18.3216	-1.36506
ph_O75886:374	O75886	0	0	0	6.96051e-06	2	0.35191	1	0.75487	LVNEAPVY(0.014)S(0.012)VY(0.755)S(0.219)K	374	Y	10254	STAM2	Hbp STAM2A STAM2B	protein-coding	2q23.3	signal transducing adaptor molecule 2 ||| Signal transducing adapter molecule 2				20.6504		20.7261													NA	20.6504	20.7261	NA	NA	NA	NA	NA	NA	20.6882	NA	NA	NA
ph_Q4V326:17	Q4V326	0	0	0	1.28804e-19	4	0.00010099	1	0.998982	RY(0.999)VQPPEMIGPMRPEQFS(0.001)DEVEPATPEEGEPATQR	17	Y	729428 100008586 645073 26748 2579 26749 2576 2543	GAGE12B GAGE12F GAGE12G GAGE12I GAGE7 GAGE2E GAGE4 GAGE1	GAGE-12B AL4 CT4.7 GAGE-7 GAGE-7B GAGE-8 GAGE7 GAGE7B GAGE-12G GAGE-2E GAGE8 CT4.4 CT4.1 GAGE-1 GAGE-4 GAGE4	protein-coding	Xp11.23!Xp11.4-p11.2	G antigen 12B ||| G antigen 12F ||| G antigen 12G ||| G antigen 12I ||| G antigen 7 ||| G antigen 12F ||| G antigen 2E ||| G antigen 4 ||| G antigen 1			20.1429																NA	20.1429	NA	NA	NA	NA	NA	NA	NA	20.1429	NA	NA	NA
ph_O94910:1441	O94910	0	0	0	0.000681948	2	-0.43295	1	0.5	NPLQGY(0.5)Y(0.5)QVR	1441	Y	22859	ADGRL1	CIRL1 CL1 LEC2 LPHN1	protein-coding	19p13.12	adhesion G-protein-coupled receptor L1			19.7291			19.4573													NA	19.7291	19.4573	NA	NA	NA	NA	NA	NA	19.5932	NA	NA	NA
ph_O95721:160	O95721	0	0	0	0.00118476	2	-1.9172	1	0.999857	Y(1)QASHPNLR	160	Y	9342	SNAP29	CEDNIK SNAP-29	protein-coding	22q11.21	synaptosome associated protein 29 ||| Synaptosomal-associated protein 29	18.8975		19.2957		19.0014	20.0643													18.8975	19.2957	19.5328	NA	NA	NA	NA	NA	NA	19.242	NA	NA	NA
ph_O95817:240	O95817	0	0	0	3.93335e-06	3	-0.70322	1	0.708792	THY(0.001)PAQQGEY(0.709)QT(0.233)HQPVY(0.057)HK	240	Y	9531	BAG3	BAG-3 BIS CAIR-1 MFM6	protein-coding	10q26.11	BAG cochaperone 3 ||| BAG family molecular chaperone regulator 3									21.6553										NA	NA	NA	NA	21.6553	NA	NA	NA	NA	NA	21.6553	NA	NA
ph_P04626:877	P04626	0	0	0	3.83073e-08	3	0.3963	1	0.758959	LLDIDET(0.241)EY(0.759)HADGGKVPIK	877	Y	2064	ERBB2	CD340 HER-2 HER-2/neu HER2 MLN-19 NEU NGL TKR1	protein-coding	17q12	erb-b2 receptor tyrosine kinase 2 ||| Receptor tyrosine-protein kinase erbB-2						20.9652						21.6247			22.0111				NA	NA	20.9652	NA	NA	21.6247	NA	22.0111	NA	20.9652	21.6247	22.0111	0.659405
ph_P06493:19	P06493	0	0	0	1.96684e-06	2	0.25936	1	0.922511	IGEGT(0.001)Y(0.076)GVVY(0.923)K	19	Y	983	CDK1	CDC2 CDC28A P34CDC2	protein-coding	10q21.2	cyclin dependent kinase 1 ||| Cyclin-dependent kinase 1			28.9724																NA	28.9724	NA	NA	NA	NA	NA	NA	NA	28.9724	NA	NA	NA
ph_P07355:317	P07355	0	0	0	6.17444e-05	2	-0.57971	1	0.94941	S(0.001)LY(0.025)Y(0.949)Y(0.025)IQQDTK	317	Y	302 304	ANXA2 ANXA2P2	ANX2 ANX2L4 CAL1H HEL-S-270 LIP2 LPC2 LPC2D P36 PAP-IV ANX2L2 ANX2P2 LPC2B	protein-coding|pseudo	15q22.2!9p13.3	annexin A2 ||| annexin A2 pseudogene 2 ||| Putative annexin A2-like protein						18.9402					19.5503	19.9735			19.7624	20.2871	19.967		NA	NA	18.9402	NA	NA	19.7619	NA	20.0248	19.967	18.9402	19.7619	19.9959	0.821738
ph_P07947:446	P07947	0	0	0	9.7873e-05	2	0.72516	1	1	WTAPEAALY(1)GR	446	Y	2534 6714 7525	FYN SRC YES1	SLK SYN p59-FYN ASV SRC1 THC6 c-SRC p60-Src HsT441 P61-YES Yes c-yes	protein-coding	6q21!20q11.23!18p11.32	FYN proto-oncogene, Src family tyrosine kinase ||| Tyrosine-protein kinase Fyn ||| SRC proto-oncogene, non-receptor tyrosine kinase ||| Proto-oncogene tyrosine-protein kinase Src ||| YES proto-oncogene 1, Src family tyrosine kinase ||| Tyrosine-protein kinase Yes											19.6723	19.9349				20.2737			NA	NA	NA	NA	NA	19.8036	NA	20.2737	NA	NA	19.8036	20.2737	NA
ph_P08069:1166	P08069	0	0	0	8.11643e-06	2	0.57129	---	0.567526	DIYET(0.014)DY(0.418)Y(0.568)RK	1166	Y	3480 3643	IGF1R INSR	CD221 IGFIR IGFR JTK13 CD220 HHF5	protein-coding	15q26.3!19p13.2	insulin like growth factor 1 receptor ||| Insulin-like growth factor 1 receptor ||| insulin receptor	19.2944		19.7342								19.8274								19.2944	19.7342	NA	NA	NA	19.8274	NA	NA	NA	19.5143	19.8274	NA	0.313116
ph_P08581:1003	P08581	0	0	0	8.17349e-21	2	-1.6308	1	0.991347	SVSPTTEMVSNES(0.009)VDY(0.991)R	1003	Y	4233	MET	AUTS9 DFNB97 HGFR RCCP2 c-Met	protein-coding	7q31.2	MET proto-oncogene, receptor tyrosine kinase ||| Hepatocyte growth factor receptor	20.4068	20.4406	20.6924	20.637	20.9626	20.8191				18.5042									20.4237	20.6647	20.8908	NA	18.5042	NA	NA	NA	NA	20.6597	18.5042	NA	-2.15549
ph_P09651:341	P09651	0	0	0	4.43149e-14	2	0.40829	1	0.988161	S(0.006)S(0.006)GPY(0.988)GGGGQYFAKPR	341	Y	3178	HNRNPA1	ALS19 ALS20 HNRPA1 HNRPA1L3 IBMPFD3 UP-1 hnRNP-A1	protein-coding	12q13.13	heterogeneous nuclear ribonucleoprotein A1													22.2428					22.2945	NA	NA	NA	NA	NA	NA	22.2428	NA	22.2945	NA	NA	22.2686	NA
ph_P10809:227	P10809	0	0	0	8.11352e-05	2	0.30062	1	0.983902	GYIS(0.015)PY(0.984)FINT(0.001)SK	227	Y	3329	HSPD1	CPN60 GROEL HLD4 HSP-60 HSP60 HSP65 HuCHA60 SPG13	protein-coding	2q33.1	heat shock protein family D (Hsp60) member 1 ||| 60 kDa heat shock protein, mitochondrial				19.9548			20.4419		20.3251										NA	19.9548	NA	20.4419	20.3251	NA	NA	NA	NA	19.9548	20.3835	NA	0.428667
ph_P15260:304	P15260	0	0	0	5.64881e-11	2	0.30503	1	0.993962	Y(0.994)VS(0.006)LITSYQPFSLEK	304	Y	3459	IFNGR1	CD119 IFNGR IMD27A IMD27B	protein-coding	6q23.3	interferon gamma receptor 1				18.927											16.6184				NA	18.927	NA	NA	NA	NA	NA	16.6184	NA	18.927	NA	16.6184	NA
ph_P18433:271	P18433	0	0	0	0.00182256	2	-0.32853	---	0.999817	Y(1)VNILPYDHSR	271	Y	5786	PTPRA	HEPTP HLPR HPTPA HPTPalpha LRP PTPA PTPRL2 R-PTP-alpha RPTPA	protein-coding	20p13	protein tyrosine phosphatase receptor type A ||| Receptor-type tyrosine-protein phosphatase alpha					18.599														NA	NA	18.599	NA	NA	NA	NA	NA	NA	18.599	NA	NA	NA
ph_P19174:1253	P19174	0	0	0	0.000788813	2	-0.38538	1	1	Y(1)QQPFEDFR	1253	Y	5335	PLCG1	NCKAP3 PLC-II PLC1 PLC148 PLCgamma1	protein-coding	20q12	phospholipase C gamma 1 ||| 1-phosphatidylinositol 4,5-bisphosphate phosphodiesterase gamma-1	18.4586		18.7993																18.4586	18.7993	NA	NA	NA	NA	NA	NA	NA	18.6289	NA	NA	NA
ph_P23396:120	P23396	0	0	0	0.0240165	2	-0.31021	---	1	ACY(1)GVLR	120	Y	6188	RPS3	S3	protein-coding	11q13.4	ribosomal protein S3 ||| 40S ribosomal protein S3	18.2983			19.0225					19.0073										18.2983	19.0225	NA	NA	19.0073	NA	NA	NA	NA	18.6604	19.0073	NA	0.346926
ph_P24941:19	P24941	0	0	0	1.96684e-06	2	0.25936	1	0.922511	IGEGT(0.001)Y(0.076)GVVY(0.923)K	19	Y	1017 1018	CDK2 CDK3	CDKN2 p33(CDK2)	protein-coding	12q13.2!17q25.1	cyclin dependent kinase 2 ||| Cyclin-dependent kinase 2 ||| cyclin dependent kinase 3 ||| Cyclin-dependent kinase 3			28.9724																NA	28.9724	NA	NA	NA	NA	NA	NA	NA	28.9724	NA	NA	NA
ph_P26639:298	P26639	0	0	0	0.00801306	2	-0.052088	---	0.99963	IY(1)GISFPDPK	298	Y	6897	TARS1	TARS TTD7 ThrRS	protein-coding	5p13.3	threonyl-tRNA synthetase 1 ||| Threonine--tRNA ligase 1, cytoplasmic			18.3547																NA	18.3547	NA	NA	NA	NA	NA	NA	NA	18.3547	NA	NA	NA
ph_Q15262:916	Q15262	0	0	0	0.00280742	2	-0.87511	---	0.999593	Y(1)GNIIAYDHSR	916	Y	5796 5797	PTPRK PTPRM	R-PTP-kappa PTPRL1 R-PTP-MU RPTPM RPTPU hR-PTPu	protein-coding	6q22.33!18p11.23	protein tyrosine phosphatase receptor type K ||| Receptor-type tyrosine-protein phosphatase kappa ||| protein tyrosine phosphatase receptor type M ||| Receptor-type tyrosine-protein phosphatase mu		20.0542									20.2209								20.0542	NA	NA	NA	NA	20.2209	NA	NA	NA	20.0542	20.2209	NA	0.166704
ph_P30040:66	P30040	0	0	0	2.39606e-05	3	-0.47302	1	0.733509	FDT(0.065)QY(0.201)PY(0.734)GEKQDEFKR	66	Y	10961	ERP29	C12orf8 ERp28 ERp31 HEL-S-107 PDI-DB PDIA9	protein-coding	12q24.13	endoplasmic reticulum protein 29 ||| Endoplasmic reticulum resident protein 29						19.2878		19.888	19.3916			19.9154		19.5599					NA	NA	19.2878	19.888	19.3916	19.9154	19.5599	NA	NA	19.2878	19.7317	19.5599	0.443859
ph_P30530:698	P30530	0	0	0	1.91431e-14	2	1.1118	1	0.999998	KIY(1)NGDYYR	698	Y	558	AXL	ARK JTK11 Tyro7 UFO	protein-coding	19q13.2	AXL receptor tyrosine kinase ||| Tyrosine-protein kinase receptor UFO	22.6455	22.7916								20.5867									22.7185	NA	NA	NA	20.5867	NA	NA	NA	NA	22.7185	20.5867	NA	-2.13182
ph_P30530:779	P30530	0	0	0	6.80503e-08	3	-0.32776	1	0.997858	LKQPADCLDGLY(0.998)ALMS(0.002)R	779	Y	558	AXL	ARK JTK11 Tyro7 UFO	protein-coding	19q13.2	AXL receptor tyrosine kinase ||| Tyrosine-protein kinase receptor UFO			18.6577										17.9521		17.9564	17.836		18.1532	NA	18.6577	NA	NA	NA	NA	17.9521	17.8962	18.1532	18.6577	NA	18.0005	NA
ph_P35222:489	P35222	0	0	0	3.41953e-28	2	0.78339	1	1	LHY(1)GLPVVVK	489	Y	1499	CTNNB1	CTNNB EVR7 MRD19 NEDSDV armadillo	protein-coding	3p22.1	catenin beta 1 ||| Catenin beta-1		20.2712																	20.2712	NA	NA	NA	NA	NA	NA	NA	NA	20.2712	NA	NA	NA
ph_P42338:425	P42338	0	0	0	1.64515e-08	3	0.85319	1	0.996014	TINPSKY(0.996)QT(0.004)IR	425	Y	5291	PIK3CB	P110BETA PI3K PI3KBETA PIK3C1	protein-coding	3q22.3	phosphatidylinositol-4,5-bisphosphate 3-kinase catalytic subunit beta ||| Phosphatidylinositol 4,5-bisphosphate 3-kinase catalytic subunit beta isoform	22.0287	22.1333	22.5669	22.332	21.7796	21.916					19.8276							17.6101	22.081	22.4495	21.8478	NA	NA	19.8276	NA	NA	17.6101	22.1261	19.8276	17.6101	-2.29849
ph_P42680:519	P42680	0	0	0	4.86474e-09	3	-0.92701	1	0.908993	Y(0.012)VLDDQY(0.909)T(0.057)S(0.016)S(0.005)S(0.002)GAKFPVK	519	Y	7006	TEC	PSCTK4	protein-coding	4p12-p11	tec protein tyrosine kinase ||| Tyrosine-protein kinase Tec	21.3611	21.2482	21.293	21.2663	21.3118	20.9783			20.8373										21.3047	21.2797	21.145	NA	20.8373	NA	NA	NA	NA	21.2431	20.8373	NA	-0.405853
ph_P46821:1062	P46821	0	0	0	1.25e-18	2	0.62346	1	0.991181	AAEAGGAEEQY(0.991)GFLT(0.006)T(0.002)PTK	1062	Y	4131	MAP1B	FUTSCH MAP5 PPP1R102	protein-coding	5q13.2	microtubule associated protein 1B ||| Microtubule-associated protein 1B			20.8505						21.0929						21.2291	21.0619			NA	20.8505	NA	NA	21.0929	NA	NA	21.1455	NA	20.8505	21.0929	21.1455	0.242362
ph_P51153:5	P51153	0	0	0	0.00308448	2	0.30923	1	1	AY(1)DHLFK	5	Y	5872	RAB13	GIG4	protein-coding	1q21.3	RAB13, member RAS oncogene family ||| Ras-related protein Rab-13		21.7813	21.7515		22.1124														21.7813	21.7515	22.1124	NA	NA	NA	NA	NA	NA	21.8817	NA	NA	NA
ph_P52799;P98172:330;343	P52799;P98172	0	0	0	1.18995e-22	3	0.3508	1	0.786879	VSGDYGHPVYIVQEMPPQS(0.002)PANIY(0.787)Y(0.211)KV	330;343	Y	1947 1948	EFNB1 EFNB2	CFND CFNS EFB1 EFL3 EPLG2 Elk-L LERK2 EPLG5 HTKL Htk-L LERK5	protein-coding	Xq13.1!13q33.3	ephrin B1 ||| Ephrin-B1 ||| ephrin B2 ||| Ephrin-B2	19.3505		20.2504	20.1565	20.4139	20.3611			19.4122	19.7571						20.5484			19.3505	20.2034	20.3875	NA	19.5846	NA	NA	20.5484	NA	19.9805	19.5846	20.5484	-0.395834
ph_P55196:1497	P55196	0	0	0	3.86728e-25	3	1.5521	1	0.985982	DLQY(0.986)IT(0.01)VS(0.003)KEELS(0.001)SGDSLSPDPWKR	1497	Y	4301	AFDN	AF6 MLL-AF6 MLLT4 l-afadin	protein-coding	6q27	afadin, adherens junction formation factor ||| Afadin		20.6778	20.5532	20.1831	20.6249			20.1446											20.6778	20.3682	20.6249	20.1446	NA	NA	NA	NA	NA	20.5569	20.1446	NA	-0.41231
ph_P56945:249	P56945	0	0	0	3.91883e-08	2	-0.049266	1	1	HLLAPGPQDIY(1)DVPPVR	249	Y	9564	BCAR1	CAS CAS1 CASS1 CRKAS P130Cas	protein-coding	16q23.1	BCAR1 scaffold protein, Cas family member ||| Breast cancer anti-estrogen resistance protein 1		19.4478							19.2406					19.8862				20.2246	19.4478	NA	NA	NA	19.2406	NA	19.8862	NA	20.2246	19.4478	19.2406	20.0554	-0.207208
ph_P56945:234	P56945	0	0	0	1.22035e-09	2	0.19401	1	0.967845	VGQGY(0.001)VY(0.031)EAAQPEQDEY(0.968)DIPR	234	Y	9564	BCAR1	CAS CAS1 CASS1 CRKAS P130Cas	protein-coding	16q23.1	BCAR1 scaffold protein, Cas family member ||| Breast cancer anti-estrogen resistance protein 1				19.0195											21.0843				NA	19.0195	NA	NA	NA	NA	NA	21.0843	NA	19.0195	NA	21.0843	NA
ph_P61026:6	P61026	0	0	0	5.85667e-19	2	0.3005	1	0.985739	KT(0.014)Y(0.986)DLLFK	6	Y	10890	RAB10	---	protein-coding	2p23.3	RAB10, member RAS oncogene family ||| Ras-related protein Rab-10		21.5432	21.3218	21.4577		21.8632			20.1381						20.3223				21.5432	21.3898	21.8632	NA	20.1381	NA	NA	20.3223	NA	21.5987	20.1381	20.3223	-1.46063
ph_P62140:304	P62140	0	0	0	3.53951e-08	3	-0.49637	1	0.540298	Y(0.54)QY(0.46)GGLNSGRPVTPPR	304	Y	5500	PPP1CB	HEL-S-80p MP NSLH2 PP-1B PP1B PP1beta PP1c PPP1CD PPP1beta	protein-coding	2p23.2	protein phosphatase 1 catalytic subunit beta ||| Serine/threonine-protein phosphatase PP1-beta catalytic subunit									21.1452										NA	NA	NA	NA	21.1452	NA	NA	NA	NA	NA	21.1452	NA	NA
ph_P62140:306	P62140	0	0	0	9.55868e-12	3	-0.10685	1	0.979074	Y(0.018)QY(0.979)GGLNS(0.002)GRPVT(0.001)PPR	306	Y	5500	PPP1CB	HEL-S-80p MP NSLH2 PP-1B PP1B PP1beta PP1c PPP1CD PPP1beta	protein-coding	2p23.2	protein phosphatase 1 catalytic subunit beta ||| Serine/threonine-protein phosphatase PP1-beta catalytic subunit	21.0955		21.6507	21.651	21.2458					21.2432							21.5052		21.0955	21.6508	21.2458	NA	21.2432	NA	NA	NA	21.5052	21.3307	21.2432	21.5052	-0.0874676
ph_P62191:25	P62191	0	0	0	0.000715039	2	0.43874	1	0.999995	KKY(1)EPPVPTR	25	Y	5700	PSMC1	P26S4 S4 p56	protein-coding	14q32.11	proteasome 26S subunit, ATPase 1 ||| 26S proteasome regulatory subunit 4			20.0417			19.6667			19.9376						19.4181				NA	20.0417	19.6667	NA	19.9376	NA	NA	19.4181	NA	19.8542	19.9376	19.4181	0.0833495
ph_P63173:43	P63173	0	0	0	0.00449816	2	0.15838	---	0.836779	Y(0.002)LY(0.837)T(0.161)LVIT(0.001)DKEK	43	Y	6169	RPL38	L38	protein-coding	17q25.1	ribosomal protein L38 ||| 60S ribosomal protein L38			18.1461	18.1482		17.9282			18.0262	17.8073							18.8783		NA	18.1471	17.9282	NA	17.9168	NA	NA	NA	18.8783	18.0376	17.9168	18.8783	-0.120884
ph_P78310:318	P78310	0	0	0	2.47496e-07	2	0.046175	1	0.991052	T(0.009)QY(0.991)NQVPSEDFER	318	Y	1525	CXADR	CAR CAR4/6 HCAR	protein-coding	21q21.1	CXADR Ig-like cell adhesion molecule ||| Coxsackievirus and adenovirus receptor			19.5786					18.5991	19.1887	18.9921									NA	19.5786	NA	18.5991	19.0904	NA	NA	NA	NA	19.5786	18.8447	NA	-0.733829
ph_Q04656:244	Q04656	0	0	0	0.000307696	2	0.19446	1	1	Y(1)LKLGAIDVER	244	Y	538	ATP7A	DSMAX MK MNK SMAX3	protein-coding	Xq21.1	ATPase copper transporting alpha ||| Copper-transporting ATPase 1	19.7201	20.1953	19.9859	20.2074	19.9767	19.8077													19.9577	20.0966	19.8922	NA	NA	NA	NA	NA	NA	19.9822	NA	NA	NA
ph_Q05397:397	Q05397	0	0	0	1.45595e-40	3	-0.10082	1	0.917642	THAVSVS(0.017)ET(0.065)DDY(0.918)AEIIDEEDTYTMPSTR	397	Y	5747	PTK2	FADK FAK FAK1 FRNK PPP1R71 p125FAK pp125FAK	protein-coding	8q24.3	protein tyrosine kinase 2 ||| Focal adhesion kinase 1	19.6173																		19.6173	NA	NA	NA	NA	NA	NA	NA	NA	19.6173	NA	NA	NA
ph_Q06418:686	Q06418	0	0	0	0.00194581	2	0.17353	1	0.600915	IYSGDY(0.399)Y(0.601)R	686	Y	10461 7301	MERTK TYRO3	MER RP38 Tyro12 c-Eyk c-mer BYK Dtk Etk-2 RSE Rek Sky Tif	protein-coding	2q13!15q15.1	MER proto-oncogene, tyrosine kinase ||| Tyrosine-protein kinase Mer ||| TYRO3 protein tyrosine kinase ||| Tyrosine-protein kinase receptor TYRO3					21.577														NA	NA	21.577	NA	NA	NA	NA	NA	NA	21.577	NA	NA	NA
ph_Q07157:1128	Q07157	0	0	0	1.71541e-27	3	0.72875	1	1	GY(1)FPRFEEPAPLSYDSRPR	1128	Y	7082	TJP1	ZO-1	protein-coding	15q13.1	tight junction protein 1 ||| Tight junction protein ZO-1			19.3758						19.5453		19.5351				20.243	20.2117			NA	19.3758	NA	NA	19.5453	19.5351	NA	20.2274	NA	19.3758	19.5402	20.2274	0.16444
ph_Q07157:1195	Q07157	0	0	0	0.0197884	2	0.18231	---	0.757224	QYFEQY(0.757)S(0.243)R	1195	Y	7082	TJP1	ZO-1	protein-coding	15q13.1	tight junction protein 1 ||| Tight junction protein ZO-1	19.2563	19.4035	19.5868	17.2088	16.0593														19.3299	18.3978	16.0593	NA	NA	NA	NA	NA	NA	17.929	NA	NA	NA
ph_Q09666:964	Q09666	0	0	0	0.000367279	2	-1.3889	1	0.944555	VKGEY(0.945)DMT(0.055)VPK	964	Y	79026	AHNAK	AHNAKRS PM227	protein-coding	11q12.3	AHNAK nucleoprotein ||| Neuroblast differentiation-associated protein AHNAK	20.6692	20.3154	20.9792				19.9492											18.8493	20.4923	20.9792	NA	19.9492	NA	NA	NA	NA	18.8493	20.7358	19.9492	18.8493	-0.786577
ph_Q13480:627	Q13480	0	0	0	1.28113e-13	2	-0.25975	1	0.999927	GDKQVEY(1)LDLDLDSGK	627	Y	2549	GAB1	DFNB26	protein-coding	4q31.21	GRB2 associated binding protein 1 ||| GRB2-associated-binding protein 1			19.6281	19.2846	18.7999	18.6669			17.1414	16.9978									NA	19.4564	18.7334	NA	17.0696	NA	NA	NA	NA	19.0949	17.0696	NA	-2.0253
ph_Q13480:317	Q13480	0	0	0	1.44677e-31	3	0.48837	1	0.813905	HVSISYDIPPT(0.012)PGNT(0.174)Y(0.814)QIPR	317	Y	2549	GAB1	DFNB26	protein-coding	4q31.21	GRB2 associated binding protein 1 ||| GRB2-associated-binding protein 1			19.8723	20.1254						18.9655	18.035	18.592							NA	19.9988	NA	NA	18.9655	18.3135	NA	NA	NA	19.9988	18.6395	NA	-1.35934
ph_Q14160:1360	Q14160	0	0	0	0.00167977	2	1.4397	1	1	QKY(1)FELEVR	1360	Y	23513	SCRIB	CRIB1 SCRB1 SCRIB1 Vartul	protein-coding	8q24.3	scribble planar cell polarity protein ||| Protein scribble homolog				19.6842										18.863		18.86		18.8034	NA	19.6842	NA	NA	NA	NA	18.863	18.86	18.8034	19.6842	NA	18.8421	NA
ph_Q14247:334	Q14247	0	0	0	1.42942e-26	3	-0.21408	1	0.983205	MDKNASTFEDVTQVS(0.004)S(0.012)AY(0.983)QK	334	Y	2017	CTTN	EMS1	protein-coding	11q13.3	cortactin ||| Src substrate cortactin	21.181	21.2441	21.5684	21.3563	21.2399				21.0466						21.093	21.1231			21.2126	21.4624	21.2399	NA	21.0466	NA	NA	21.1081	NA	21.3049	21.0466	21.1081	-0.258349
ph_Q15149:4615	Q15149	0	0	0	5.82302e-08	2	0.59118	1	0.836868	GY(0.011)Y(0.042)S(0.047)PY(0.837)S(0.059)VS(0.002)GS(0.001)GSTAGS(0.001)R	4615	Y	5339	PLEC	EBS1 EBSMD EBSND EBSO EBSOG EBSPA HD1 LGMD2Q LGMDR17 PCN PLEC1 PLEC1b PLTN	protein-coding	8q24.3	plectin			19.5609																NA	19.5609	NA	NA	NA	NA	NA	NA	NA	19.5609	NA	NA	NA
ph_Q15464:336	Q15464	0	0	0	9.89623e-15	3	0.63214	1	0.997482	ES(0.003)KLPQDDDRPADEY(0.997)DQPWEWNR	336	Y	6461	SHB	bA3J10.2	protein-coding	9p13.1	SH2 domain containing adaptor protein B ||| SH2 domain-containing adapter protein B	20.0359		20.0806	20.2788	20.2081			19.8082											20.0359	20.1797	20.2081	19.8082	NA	NA	NA	NA	NA	20.1412	19.8082	NA	-0.333067
ph_Q16513:635	Q16513	0	0	0	1.15302e-34	4	0.15319	1	0.735548	SQSEYKPDT(0.002)PQS(0.028)GLEY(0.736)S(0.234)GIQELEDRR	635	Y	5586	PKN2	PAK2 PRK2 PRKCL2 PRO2042 Pak-2 STK7	protein-coding	1p22.2	protein kinase N2 ||| Serine/threonine-protein kinase N2				21.1341			19.5934	20.1499	19.6819	19.1362	19.0879	19.054					18.7168		NA	21.1341	NA	19.8717	19.4091	19.0709	NA	NA	18.7168	21.1341	19.4506	18.7168	-1.6835
ph_Q5JU85:1129	Q5JU85	0	0	0	1.08046e-54	3	-0.090245	1	0.974549	S(0.003)S(0.003)LEDT(0.02)Y(0.975)GAGDGLKR	1129	Y	23096	IQSEC2	BRAG1 IQ-ArfGEF MRX1 MRX18 MRX78	protein-coding	Xp11.22	IQ motif and Sec7 domain ArfGEF 2 ||| IQ motif and SEC7 domain-containing protein 2	21.6554	21.2712		21.0882		20.9294					20.8917	20.3073	21.3814						21.4633	21.0882	20.9294	NA	NA	20.5995	21.3814	NA	NA	21.1603	20.5995	21.3814	-0.560806
ph_Q6XZF7:1477	Q6XZF7	0	0	0	2.62168e-11	3	-0.22557	1	0.921258	NFRHPEIVGY(0.921)S(0.079)VPGR	1477	Y	23268	DNMBP	ARHGEF36 CTRCT48 TUBA	protein-coding	10q24.2	dynamin binding protein ||| Dynamin-binding protein	20.7178		20.5994	20.6594	20.4315				19.846							19.4724			20.7178	20.6294	20.4315	NA	19.846	NA	NA	19.4724	NA	20.5929	19.846	19.4724	-0.746917
ph_Q86X29:328	Q86X29	0	0	0	8.49891e-15	3	-0.065285	1	0.701882	AATSGVPSIYAPS(0.061)T(0.219)Y(0.702)AHLS(0.018)PAK	328	Y	51599	LSR	ILDR3 LISCH7	protein-coding	19q13.12	lipolysis stimulated lipoprotein receptor ||| Lipolysis-stimulated lipoprotein receptor	21.2034	21.0811	21.1934		21.6384		20.501							20.5696					21.1423	21.1934	21.6384	20.501	NA	NA	20.5696	NA	NA	21.3247	20.501	20.5696	-0.823664
ph_Q86X29:406	Q86X29	0	0	0	6.27212e-10	3	-0.39017	1	0.943183	VLY(0.943)Y(0.057)MEKELANFDPSRPGPPSGR	406	Y	51599	LSR	ILDR3 LISCH7	protein-coding	19q13.12	lipolysis stimulated lipoprotein receptor ||| Lipolysis-stimulated lipoprotein receptor			18.9292				17.811		17.3202	17.6003	17.3652								NA	18.9292	NA	17.811	17.4603	17.3652	NA	NA	NA	18.9292	17.5455	NA	-1.38374
ph_Q8IWW6:355	Q8IWW6	0	0	0	1.86834e-07	2	-0.21912	1	0.72154	GHT(0.006)LY(0.722)T(0.219)S(0.051)DY(0.002)T(0.001)NEK	355	Y	94134	ARHGAP12	---	protein-coding	10p11.22	Rho GTPase activating protein 12 ||| Rho GTPase-activating protein 12	19.4623	19.3225	20	19.4007	19.3548	18.4151			17.7115										19.3924	19.7003	18.885	NA	17.7115	NA	NA	NA	NA	19.3259	17.7115	NA	-1.6144
ph_Q8IXS6:180	Q8IXS6	0	0	0	0.00268443	2	-2.0967	---	0.994475	VYDDGT(0.005)KVVY(0.994)EVR	180	Y	445815	PALM2AKAP2	AKAP-2 AKAP-KL AKAP2 AKAPKL MISP2 PALM2 PALM2-AKAP2 PRKA2	protein-coding	9q31.3	PALM2 and AKAP2 fusion ||| Paralemmin-2	18.4409		18.6523																18.4409	18.6523	NA	NA	NA	NA	NA	NA	NA	18.5466	NA	NA	NA
ph_Q8IZP0:198	Q8IZP0	0	0	0	1.61185e-44	3	0.2679	1;2	0.616858	NT(0.212)PY(0.617)KT(0.171)LEPVKPPTVPNDYMTSPAR	198	Y	10006	ABI1	ABI-1 ABLBP4 E3B1 NAP1BP SSH3BP SSH3BP1	protein-coding	10p12.1	abl interactor 1	22.1682				21.3656														22.1682	NA	21.3656	NA	NA	NA	NA	NA	NA	21.7669	NA	NA	NA
ph_Q8N8Z6:589	Q8N8Z6	0	0	0	1.42616e-12	3	-0.25655	2	0.999988	AGRHEY(1)ALPLAPPEPEY(0.744)AT(0.256)PIVER	589	Y	285761	DCBLD1	dJ94G16.1	protein-coding	6q22.1	discoidin, CUB and LCCL domain containing 1 ||| Discoidin, CUB and LCCL domain-containing protein 1			19.8501																NA	19.8501	NA	NA	NA	NA	NA	NA	NA	19.8501	NA	NA	NA
ph_Q8N8Z6:600	Q8N8Z6	0	0	0	1.42616e-12	3	-0.25655	2	0.744326	AGRHEY(1)ALPLAPPEPEY(0.744)AT(0.256)PIVER	600	Y	285761	DCBLD1	dJ94G16.1	protein-coding	6q22.1	discoidin, CUB and LCCL domain containing 1 ||| Discoidin, CUB and LCCL domain-containing protein 1			19.8501																NA	19.8501	NA	NA	NA	NA	NA	NA	NA	19.8501	NA	NA	NA
ph_Q8N8Z6:578	Q8N8Z6	0	0	0	4.3951e-26	4	-0.48049	1	0.99765	KGSTFRPMDTDAEEAGVS(0.001)T(0.002)DAGGHY(0.998)DCPQR	578	Y	285761	DCBLD1	dJ94G16.1	protein-coding	6q22.1	discoidin, CUB and LCCL domain containing 1 ||| Discoidin, CUB and LCCL domain-containing protein 1	21.0815		21.8312					19.908									19.4517		21.0815	21.8312	NA	19.908	NA	NA	NA	NA	19.4517	21.4563	19.908	19.4517	-1.54831
ph_Q8NI17:639	Q8NI17	0	0	0	1.07942e-22	2	0.10124	1	0.999104	NGY(0.999)VT(0.001)CPFRPDCPLGK	639	Y	133396	IL31RA	CRL CRL3 GLM-R GLMR GPL IL-31RA PLCA2 PRO21384 hGLM-R	protein-coding	5q11.2	interleukin 31 receptor A ||| Interleukin-31 receptor subunit alpha	19.5618								20.1941	20.2877							20.1108		19.5618	NA	NA	NA	20.2409	NA	NA	NA	20.1108	19.5618	20.2409	20.1108	0.679082
ph_Q8TEW8:1000	Q8TEW8	0	0	0	2.16704e-15	3	-0.57145	1	0.99999	DGHPLSPERDHLEGLY(1)AK	1000	Y	117583	PARD3B	ALS2CR19 PAR3B PAR3L PAR3beta	protein-coding	2q33.3	par-3 family cell polarity regulator beta ||| Partitioning defective 3 homolog B	21.7256		21.648	21.1119					21.0936										21.7256	21.3799	NA	NA	21.0936	NA	NA	NA	NA	21.5528	21.0936	NA	-0.45918
ph_Q8WU20:306	Q8WU20	0	0	0	5.32237e-08	2	0.30124	1	0.999597	LVY(1)ENINGLSIPSASGVR	306	Y	10818	FRS2	FRS1A FRS2A FRS2alpha SNT SNT-1 SNT1	protein-coding	12q15	fibroblast growth factor receptor substrate 2					18.6481								17.8226	17.9016			17.9704	18.0067	NA	NA	18.6481	NA	NA	NA	17.8621	NA	17.9886	18.6481	NA	17.9253	NA
ph_Q8WU20:349	Q8WU20	0	0	0	4.01093e-06	2	0.92246	1	0.915567	T(0.076)ALLNY(0.916)ENLPS(0.009)LPPVWEAR	349	Y	10818	FRS2	FRS1A FRS2A FRS2alpha SNT SNT-1 SNT1	protein-coding	12q15	fibroblast growth factor receptor substrate 2				19.0605			15.2834	18.5936									18.0122		NA	19.0605	NA	16.9385	NA	NA	NA	NA	18.0122	19.0605	16.9385	18.0122	-2.12194
ph_Q8WX93:1348	Q8WX93	0	0	0	0.000118346	2	0.1225	1	0.999638	Y(1)AALSDQGLDIK	1348	Y	23022	PALLD	CGI-151 CGI151 MYN PNCA1 SIH002	protein-coding	4q32.3	palladin, cytoskeletal associated protein ||| Palladin			18.3848				17.6311								17.6324			18.0669	NA	18.3848	NA	17.6311	NA	NA	NA	17.6324	18.0669	18.3848	17.6311	17.8496	-0.753644
ph_Q96AC1:179	Q96AC1	0	0	0	1.36849e-49	3	1.3547	1	0.507546	KLDDQSEDEALELEGPLIT(0.001)PGS(0.072)GS(0.18)IY(0.508)S(0.18)S(0.059)PGLY(0.001)S(0.001)K	179	Y	10979	FERMT2	KIND2 MIG2 PLEKHC1 UNC112 UNC112B mig-2	protein-coding	14q22.1	fermitin family member 2 ||| Fermitin family homolog 2		21.0216																	21.0216	NA	NA	NA	NA	NA	NA	NA	NA	21.0216	NA	NA	NA
ph_Q96D71:126	Q96D71	0	0	0	9.43064e-13	3	-0.29889	1	0.64978	HAAS(0.001)Y(0.002)S(0.001)S(0.002)DS(0.005)ENQGS(0.17)Y(0.65)S(0.17)GVIPPPPGR	126	Y	85021	REPS1	NBIA7 RALBP1	protein-coding	6q24.1	RALBP1 associated Eps domain containing 1 ||| RalBP1-associated Eps domain-containing protein 1		20.2134	20.8732			20.269													20.2134	20.8732	20.269	NA	NA	NA	NA	NA	NA	20.4519	NA	NA	NA
ph_Q96PD2:621	Q96PD2	0	0	0	4.4085e-67	3	0.24154	1	0.886746	EVT(0.012)T(0.012)VLQADS(0.089)AEY(0.887)AQPLVGGIVGTLHQR	621	Y	131566	DCBLD2	CLCP1 ESDN	protein-coding	3q12.1|3	discoidin, CUB and LCCL domain containing 2 ||| Discoidin, CUB and LCCL domain-containing protein 2			21.1643	21.098		21.1028			19.2731										NA	21.1312	21.1028	NA	19.2731	NA	NA	NA	NA	21.117	19.2731	NA	-1.84388
ph_Q96QZ7:373	Q96QZ7	0	0	0	1.24657e-10	3	0.0902	1	0.978642	IEDPVY(0.979)GIY(0.016)Y(0.005)VDHINRK	373	Y	9223	MAGI1	AIP-3 AIP3 BAIAP1 BAP-1 BAP1 MAGI-1 MAGI-1b Magi1d TNRC19 WWP3	protein-coding	3p14.1	membrane associated guanylate kinase, WW and PDZ domain containing 1 ||| Membrane-associated guanylate kinase, WW and PDZ domain-containing protein 1			19.5233										20.2178						NA	19.5233	NA	NA	NA	NA	20.2178	NA	NA	19.5233	NA	20.2178	NA
ph_Q96T37:336	Q96T37	0	0	0	0.00228165	2	-1.4603	1	0.777157	ERDY(0.223)PFY(0.777)ER	336	Y	64783	RBM15	OTT OTT1 SPEN	protein-coding	1p13.3	RNA binding motif protein 15 ||| RNA-binding protein 15			19.3998	19.6719					18.7685	19.369				18.9798	18.7254	19.5153		19.9806	NA	19.5358	NA	NA	19.0688	NA	18.9798	19.1203	19.9806	19.5358	19.0688	19.3603	-0.467075
ph_Q99569:224	Q99569	0	0	0	8.4933e-12	2	0.2977	1	0.76297	AQS(0.004)PS(0.216)Y(0.763)VIS(0.013)T(0.004)GVSPSR	224	Y	8502	PKP4	p0071	protein-coding	2q24.1	plakophilin 4 ||| Plakophilin-4			19.4321				18.2791			17.8993									NA	19.4321	NA	18.2791	17.8993	NA	NA	NA	NA	19.4321	18.0892	NA	-1.34285
ph_Q99569:482	Q99569	0	0	0	8.69323e-21	3	-0.1372	1	0.953597	NNYALNT(0.009)T(0.009)AT(0.009)Y(0.008)AEPY(0.954)RPIQY(0.011)R	482	Y	8502	PKP4	p0071	protein-coding	2q24.1	plakophilin 4 ||| Plakophilin-4			20.2174					18.4569		18.3841	18.5285								NA	20.2174	NA	18.4569	18.3841	18.5285	NA	NA	NA	20.2174	18.4565	NA	-1.76092
ph_Q99569:114	Q99569	0	0	0	7.11226e-06	2	0.18656	1	0.999994	VSDAVQPNNY(1)LIR	114	Y	8502	PKP4	p0071	protein-coding	2q24.1	plakophilin 4 ||| Plakophilin-4			19.7049		19.5734				19.842						19.8665				NA	19.7049	19.5734	NA	19.842	NA	NA	19.8665	NA	19.6392	19.842	19.8665	0.202853
ph_Q9C004:52	Q9C004	0	0	0	5.56565e-30	3	0.76359	1	0.998279	T(0.001)S(0.001)HVENDY(0.998)IDNPSLALTTGPKR	52	Y	81848	SPRY4	HH17	protein-coding	5q31.3	sprouty RTK signaling antagonist 4 ||| Protein sprouty homolog 4	20.3467	20.0884	20.5745			19.7239													20.2175	20.5745	19.7239	NA	NA	NA	NA	NA	NA	20.172	NA	NA	NA
ph_Q9H1N7:43	Q9H1N7	0	0	0	0.000197493	2	0.85419	1	0.999825	Y(1)ISITVPSK	43	Y	51000	SLC35B3	C6orf196 CGI-19 PAPST2	protein-coding	6p24.3	solute carrier family 35 member B3 ||| Adenosine 3'-phospho 5'-phosphosulfate transporter 2	21.1404	21.5357	21.3287	21.2104	21.8721	21.8933		17.8405											21.3381	21.2695	21.8827	17.8405	NA	NA	NA	NA	NA	21.4968	17.8405	NA	-3.65631
ph_Q9HAU0:590	Q9HAU0	0	0	0	0.00670487	2	0.12881	1	1	HVY(1)VPDRR	590	Y	54477	PLEKHA5	PEPP-2 PEPP2	protein-coding	12p12.3	pleckstrin homology domain containing A5 ||| Pleckstrin homology domain-containing family A member 5	18.7493	19.2846			18.7649												17.5616		19.0169	NA	18.7649	NA	NA	NA	NA	NA	17.5616	18.8909	NA	17.5616	NA
ph_Q9NWU5:165	Q9NWU5	0	0	0	0.0213111	2	-2.4437	---	0.998819	VY(0.999)CHY(0.001)FVK	165	Y	29093	MRPL22	HSPC158 L22mt MRP-L22 MRP-L25 RPML25	protein-coding	5q33.2	mitochondrial ribosomal protein L22 ||| 39S ribosomal protein L22, mitochondrial															21.2714				NA	NA	NA	NA	NA	NA	NA	21.2714	NA	NA	NA	21.2714	NA
ph_Q9NYB9:213	Q9NYB9	0	0	0	4.19485e-13	3	0.51906	1	0.915817	TLEPVRPPVVPNDY(0.916)VPS(0.079)PT(0.006)R	213	Y	10152	ABI2	ABI-2 ABI2B AIP-1 AIP1 AblBP3 SSH3BP2 argBP1 argBPIA argBPIB	protein-coding	2q33.2	abl interactor 2			19.6751						19.709					19.9243					NA	19.6751	NA	NA	19.709	NA	19.9243	NA	NA	19.6751	19.709	19.9243	0.0338389
ph_Q9NZM1:458	Q9NZM1	0	0	0	5.87779e-05	2	0.71692	1	0.640474	NDVVGT(0.179)T(0.179)Y(0.64)LHLS(0.002)K	458	Y	26509	MYOF	FER1L3	protein-coding	10q23.33	myoferlin	19.9568		19.8444	19.171	20.2368			20.1954					20.5093						19.9568	19.5077	20.2368	20.1954	NA	NA	20.5093	NA	NA	19.9004	20.1954	20.5093	0.294926
ph_Q9UDY2:1118	Q9UDY2	0	0	0	7.66233e-07	3	-0.55148	1	1	IEIAQKHPDIY(1)AVPIK	1118	Y	9414	TJP2	C9DUPq21.11 DFNA51 DUP9q21.11 PFIC4 X104 ZO2	protein-coding	9q21.11	tight junction protein 2 ||| Tight junction protein ZO-2			21.5338																NA	21.5338	NA	NA	NA	NA	NA	NA	NA	21.5338	NA	NA	NA
ph_Q9UEU0:112	Q9UEU0	0	0	0	0.000139333	2	-1.0442	1	0.850281	Y(0.85)GIY(0.15)AVENEHMNR	112	Y	10490	VTI1B	VTI1 VTI1-LIKE VTI1L VTI2 v-SNARE vti1-rp1	protein-coding	14q24.1	vesicle transport through interaction with t-SNAREs 1B ||| Vesicle transport through interaction with t-SNAREs homolog 1B			18.7352		19.3534														NA	18.7352	19.3534	NA	NA	NA	NA	NA	NA	19.0443	NA	NA	NA
ph_Q9UJM3:394	Q9UJM3	0	0	0	3.76094e-09	3	-0.22635	1	0.677685	VS(0.053)S(0.048)T(0.048)HY(0.678)Y(0.174)LLPERPPY(0.001)LDKYEK	394	Y	54206	ERRFI1	GENE-33 MIG-6 MIG6 RALT	protein-coding	1p36.23	ERBB receptor feedback inhibitor 1	20.401																		20.401	NA	NA	NA	NA	NA	NA	NA	NA	20.401	NA	NA	NA
ph_Q9UJU6:162	Q9UJU6	0	0	0	6.30641e-12	2	-0.11784	1	0.988416	FQDVGPQAPVGS(0.012)VY(0.988)QK	162	Y	28988	DBNL	ABP1 HIP-55 HIP55 SH3P7	protein-coding	7p13	drebrin like ||| Drebrin-like protein	20.161		20.3605	19.7305	19.8813										20.1442	20.0195			20.161	20.0455	19.8813	NA	NA	NA	NA	20.0819	NA	20.0293	NA	20.0819	NA
ph_Q9ULW0:519	Q9ULW0	0	0	0	2.07512e-12	3	0.53041	1	1	AQPVPHY(1)GVPFKPQIPEAR	519	Y	22974	TPX2	C20orf1 C20orf2 DIL-2 DIL2 FLS353 GD:C20orf1 HCA519 HCTP4 REPP86 p100	protein-coding	20q11.21	TPX2 microtubule nucleation factor ||| Targeting protein for Xklp2	20.7433		20.8183						20.1774										20.7433	20.8183	NA	NA	20.1774	NA	NA	NA	NA	20.7808	20.1774	NA	-0.603407
ph_Q9UQ13:578	Q9UQ13	0	0	0	0.00109642	2	0.087956	1	1	MQGPY(1)RAMV	578	Y	8036	SHOC2	SIAA0862 SOC2 SUR8	protein-coding	10q25.2	SHOC2 leucine rich repeat scaffold protein ||| Leucine-rich repeat protein SHOC-2	21.5049	22.2666	21.9057	22.1037		21.9564													21.8858	22.0047	21.9564	NA	NA	NA	NA	NA	NA	21.9489	NA	NA	NA
ph_Q9Y5S2:1638	Q9Y5S2	0	0	0	1.38451e-09	3	-0.099455	1	0.728507	NKPY(0.729)IS(0.219)WPS(0.022)S(0.022)GGS(0.008)EPSVTVPLR	1638	Y	9578	CDC42BPB	MRCKB	protein-coding	14q32.32	CDC42 binding protein kinase beta ||| Serine/threonine-protein kinase MRCK beta					19.9719														NA	NA	19.9719	NA	NA	NA	NA	NA	NA	19.9719	NA	NA	NA
ph_Q9Y6N7:1038	Q9Y6N7	0	0	0	9.85435e-26	3	-0.036341	1	0.612798	QTNLMLPES(0.193)T(0.193)VY(0.613)GDVDLS(0.002)NKINEMK	1038	Y	6091	ROBO1	DUTT1 SAX3	protein-coding	3p12.3	roundabout guidance receptor 1 ||| Roundabout homolog 1			19.762		20.2734	20.5272				19.9866						20.4382			NA	19.762	20.4003	NA	19.9866	NA	NA	20.4382	NA	20.0812	19.9866	20.4382	-0.0945936
ph_Q9Y6R4:1076	Q9Y6R4	0	0	0	0.00357591	2	1.3504	1	0.828596	KWMNY(0.829)VLT(0.171)K	1076	Y	4216	MAP3K4	MAPKKK4 MEKK-4 MEKK4 MTK1 PRO0412	protein-coding	6q26	mitogen-activated protein kinase kinase kinase 4	17.3199														23.5942				17.3199	NA	NA	NA	NA	NA	NA	23.5942	NA	17.3199	NA	23.5942	NA
ph_Q05397:577	Q05397	0	0	0	1.60864e-07	2	-0.42687	2	0.952569	YMEDS(0.001)T(0.23)Y(0.805)Y(0.953)KAS(0.011)K	577	Y	5747	PTK2	FADK FAK FAK1 FRNK PPP1R71 p125FAK pp125FAK	protein-coding	8q24.3	protein tyrosine kinase 2 ||| Focal adhesion kinase 1	21.1037	20.9912	21.3494	21.0469	22.1464		22.1027	21.8853	22.1346	21.8784	22.2763	22.042	22.5878	22.365	22.5326	22.4043	22.9912	22.4871	21.0475	21.1981	22.1464	21.994	22.0065	22.1592	22.4764	22.4684	22.7392	21.464	22.0532	22.5613	0.589242
ph_P24941:14	P24941	0	0	0	2.30851e-75	2	0.23086	1;2	1	VEKIGEGT(1)Y(1)GVVYK	14	T	1017 1018	CDK2 CDK3	CDKN2 p33(CDK2)	protein-coding	12q13.2!17q25.1	cyclin dependent kinase 2 ||| Cyclin-dependent kinase 2 ||| cyclin dependent kinase 3 ||| Cyclin-dependent kinase 3	26.1635	26.2037	26.3833	26.6931	27.0286	27.1768	26.7186	26.9772	27.0873	27.1916	26.913	27.3764	27.2805	27.5895	27.4995	27.8853	27.5648	27.7352	26.1836	26.5382	27.1027	26.8479	27.1395	27.1447	27.435	27.6924	27.65	26.6081	27.044	27.5925	0.435892
ph_P24941:15	P24941	0	0	0	1.56938e-110	1	0.24798	1;2	1	IGEGT(1)Y(1)GVVYK	15	Y	1017 1018	CDK2 CDK3	CDKN2 p33(CDK2)	protein-coding	12q13.2!17q25.1	cyclin dependent kinase 2 ||| Cyclin-dependent kinase 2 ||| cyclin dependent kinase 3 ||| Cyclin-dependent kinase 3	29.0125	29.2779	26.388	28.996	29.9612	29.8727	29.6814	29.8297	29.7137	29.7291	30.0441	30.1643	30.1853	30.3115	30.1532	30.3421	30.4171	30.5022	29.1452	27.692	29.9169	29.7555	29.7214	30.1042	30.2484	30.2476	30.4597	28.918	29.8604	30.3186	0.942362
ph_Q8NI17:708	Q8NI17	0	0	0	4.88991e-46	3	-0.036537	1	1	EQLLFSGQSLVPDHLCEEGAPNPY(1)LK	708	Y	133396	IL31RA	CRL CRL3 GLM-R GLMR GPL IL-31RA PLCA2 PRO21384 hGLM-R	protein-coding	5q11.2	interleukin 31 receptor A ||| Interleukin-31 receptor subunit alpha	20.6261	21.2359	19.8581			20.9177	21.5464	21.7859	20.3041		21.3358				21.6975	21.8632		21.9501	20.931	19.8581	20.9177	21.6661	20.3041	21.3358	NA	21.7803	21.9501	20.5689	21.102	21.8652	0.533071
ph_P29597:292	P29597	0	0	0	8.20192e-56	2	-0.51181	1	1	LLAQAEGEPCY(1)IR	292	Y	7297	TYK2	IMD35 JTK1	protein-coding	19p13.2	tyrosine kinase 2 ||| Non-receptor tyrosine-protein kinase TYK2	24.2863	24.4184	24.279	23.9937	24.9734	24.7873	25.182	25.0945	25.2175	25.0081	25.3228	25.3343	25.5075	25.2667	25.3559	25.4384	25.4297	25.2478	24.3524	24.1363	24.8803	25.1382	25.1128	25.3285	25.3871	25.3972	25.3388	24.4563	25.1932	25.3743	0.736845
ph_P25787:57	P25787	0	0	0	0.00350777	2	0.32864	1	0.999913	SILY(1)DER	57	Y	5683	PSMA2	HC3 MU PMSA2 PSC2	protein-coding	7p14.1	proteasome 20S subunit alpha 2 ||| Proteasome subunit alpha type-2	18.855	18.7697	18.9137	19.0524	19.3726	19.705			19.6318	19.7439	19.463			19.9982			20.0044	20.1098	18.8123	18.9831	19.5388	NA	19.6879	19.463	19.9982	NA	20.0571	19.1114	19.5754	20.0276	0.464025
ph_P00533:1172	P00533	0	0	0	1.41641e-43	3	0.044658	1	1	GSHQISLDNPDY(1)QQDFFPK	1172	Y	1956	EGFR	ERBB ERBB1 HER1 NISBD2 PIG61 mENA	protein-coding	7p11.2	epidermal growth factor receptor	21.7714	22.0932	21.9597	22.3074	22.0462	22.0624	21.9819	22.1266	21.9683	21.7927	21.9901	22.0267	22.5252	22.449	22.7121	22.5292	22.4987	22.4055	21.9323	22.1335	22.0543	22.0542	21.8805	22.0084	22.4871	22.6207	22.4521	22.04	21.981	22.52	-0.0590123
ph_P11362:654	P11362	0	0	0	0.000167001	2	0.363	1;2	1	DIHHIDY(1)Y(1)KK	654	Y	2260	FGFR1	BFGFR CD331 CEK ECCL FGFBR FGFR-1 FLG FLT-2 FLT2 HBGFR HH2 HRTFDS KAL2 N-SAM OGD bFGF-R-1	protein-coding	8p11.23	fibroblast growth factor receptor 1	19.7161	23.4551	19.8764	23.0837	22.6229	22.7639	22.8181	22.906	20.3336	23.2454	22.9437	23.1045	23.0548	23.2761	22.9991	23.1742	22.8313	22.7074	21.5856	21.4801	22.6934	22.862	21.7895	23.0241	23.1655	23.0867	22.7694	21.9197	22.5585	23.0072	0.638866
ph_O00154:194	O00154	0	0	0	0.000475576	2	1.1299	1	1	Y(1)EAQKLER	194	Y	11332	ACOT7	ACH1 ACT BACH CTE-II LACH LACH1 hBACH	protein-coding	1p36.31	acyl-CoA thioesterase 7 ||| Cytosolic acyl coenzyme A thioester hydrolase	20.1054	20.4216	20.1341	17.9554			20.437	20.7447	21.4325	22.9834	21.2677	20.6729	21.6128	22.8938	20.5014	21.5536		20.0936	20.2635	19.0447	NA	20.5908	22.208	20.9703	22.2533	21.0275	20.0936	19.6541	21.2564	21.1248	1.60224
ph_O15061:432	O15061	0	0	0	0.000799175	2	0.63048	1	0.826146	TFS(0.008)PT(0.166)Y(0.826)GLLR	432	Y	23336	SYNM	DMN SYN	protein-coding	15q26.3	synemin			18.88		18.7477	19.1037	18.8555		18.8957	19.2353		19.4865	19.3454	19.239		19.7672	20.0778		NA	18.88	18.9257	18.8555	19.0655	19.4865	19.2922	19.7672	20.0778	18.9029	19.1358	19.7124	0.232969
ph_P62136:306	P62136	0	0	0	5.4108e-79	3	0.29855	1	1	Y(1)GQFSGLNPGGRPITPPR	306	Y	5499	PPP1CA	PP-1A PP1A PP1alpha PPP1A	protein-coding	11q13.2	protein phosphatase 1 catalytic subunit alpha ||| Serine/threonine-protein phosphatase PP1-alpha catalytic subunit	22.8366	23.1614	23.0672	22.8126	23.2061	22.9945	23.0219	22.921	22.7565	23.0944	23.0268	23.1336	23.6215	23.5717	23.3913	23.3364	23.5482	23.4074	22.999	22.9399	23.1003	22.9714	22.9254	23.0802	23.5966	23.3639	23.4778	23.0131	22.9924	23.4794	-0.0207017
ph_Q05639;Q5VTE0:29;29	Q5VTE0;Q05639	0	0	0	1.26613e-11	2	0.37394	1	1	STTTGHLIY(1)K	29;29	Y	1915 1917 158078	EEF1A1 EEF1A2 EEF1A1P5	CCS-3 CCS3 EE1A1 EEF-1 EEF1A EF-Tu EF1A GRAF-1EF HNGC:16303 LENG7 PTI1 eEF1A-1 EEF1AL EF-1-alpha-2 EIEE33 HS1 MRD38 STN STNL EEF1AL3	protein-coding|pseudo	6q13!20q13.33!9q34.13	eukaryotic translation elongation factor 1 alpha 1 ||| Elongation factor 1-alpha 1 ||| eukaryotic translation elongation factor 1 alpha 2 ||| Elongation factor 1-alpha 2 ||| eukaryotic translation elongation factor 1 alpha 1 pseudogene 5 ||| Putative elongation factor 1-alpha-like 3	22.3396	22.4106	22.4528	22.4579	22.4241	22.4395	22.5167	22.3822	22.8016	22.7694	22.8195	22.8927	22.7612	23.125	22.8773	22.8224	22.9289	22.684	22.3751	22.4553	22.4318	22.4494	22.7855	22.8561	22.9431	22.8499	22.8065	22.4207	22.697	22.8665	0.276278
ph_O00401:256	O00401	0	0	0	5.19765e-69	1	0.37818	1	1	VIY(1)DFIEK	256	Y	8976 142685	WASL ASB15	N-WASP NWASP WASPB	protein-coding	7q31.32	WASP like actin nucleation promoting factor ||| ankyrin repeat and SOCS box containing 15 ||| Neural Wiskott-Aldrich syndrome protein	21.7782	22.2775	21.8334	22.1947	22.3331	22.356	22.1901	22.4571	22.5499	22.7731	22.3614	22.8673	22.5475	22.521	22.7572	22.9827	22.609	22.5754	22.0279	22.014	22.3446	22.3236	22.6615	22.6144	22.5343	22.8699	22.5922	22.1288	22.5332	22.6655	0.40434
ph_P56945:385	P56945	0	0	0	2.48677e-08	2	0.68551	1	0.58617	RPGPGT(0.586)LY(0.414)DVPR	385	T	9564	BCAR1	CAS CAS1 CASS1 CRKAS P130Cas	protein-coding	16q23.1	BCAR1 scaffold protein, Cas family member ||| Breast cancer anti-estrogen resistance protein 1		21.4643		21.4208			21.7229	21.311		21.7106	22.0918	21.8774	21.9676	22.0481			22.4507		21.4643	21.4208	NA	21.517	21.7106	21.9846	22.0079	NA	22.4507	21.4426	21.7374	22.2293	0.294792
ph_P08621:126	P08621	0	0	0	7.06228e-26	3	0.7326	1	1	REFEVY(1)GPIKR	126	Y	6625	SNRNP70	RNPU1Z RPU1 SNRP70 Snp1 U1-70K U170K U1AP U1RNP	protein-coding	19q13.33	small nuclear ribonucleoprotein U1 subunit 70 ||| U1 small nuclear ribonucleoprotein 70 kDa	22.1508	22.1677	22.0461	21.6854	22.4878	22.3341	22.5284	22.62	22.3337	22.3749	22.8134	22.6529	22.8508	22.8229	22.6251	22.7228	22.7018	22.6914	22.1592	21.8657	22.4109	22.5742	22.3543	22.7332	22.8368	22.674	22.6966	22.1453	22.5539	22.7358	0.408573
ph_Q9NXD2:708	Q9NXD2	0	0	0	4.71e-26	2	-0.23415	1	0.999971	SGPLEACY(1)GELGQSR	708	Y	54893	MTMR10	---	protein-coding	15q13.3	myotubularin related protein 10 ||| Myotubularin-related protein 10	20.6492	20.8106	20.6332	20.3952	20.8433	20.5078	20.7312	20.7637	20.737	20.6572	20.6543	20.3836	21.3221	20.936	20.992	21.1824	21.0487		20.7299	20.5142	20.6755	20.7475	20.6971	20.5189	21.1291	21.0872	21.0487	20.6399	20.6545	21.0883	0.0146367
ph_P61604:76	P61604	0	0	0	0.00144145	2	0.10898	1	0.961014	VLLPEY(0.961)GGT(0.039)K	76	Y	3336	HSPE1	CPN10 EPF GROES HSP10	protein-coding	2q33.1	heat shock protein family E (Hsp10) member 1 ||| 10 kDa heat shock protein, mitochondrial				18.0665	19.1459	19.1513	19.2518		19.7803		19.6272		19.5162	20.0245		19.7207		19.7383	NA	18.0665	19.1486	19.2518	19.7803	19.6272	19.7704	19.7207	19.7383	18.6075	19.5531	19.7431	0.945581
ph_P07947:426	P07947	0	0	0	7.04026e-204	1	0.35084	1	0.999961	LIEDNEY(1)TAR	426	Y	2534 3932 6714 7525	FYN LCK SRC YES1	SLK SYN p59-FYN IMD22 LSK YT16 p56lck pp58lck ASV SRC1 THC6 c-SRC p60-Src HsT441 P61-YES Yes c-yes	protein-coding	6q21!1p35.2!20q11.23!18p11.32	FYN proto-oncogene, Src family tyrosine kinase ||| Tyrosine-protein kinase Fyn ||| LCK proto-oncogene, Src family tyrosine kinase ||| Tyrosine-protein kinase Lck ||| SRC proto-oncogene, non-receptor tyrosine kinase ||| Proto-oncogene tyrosine-protein kinase Src ||| YES proto-oncogene 1, Src family tyrosine kinase ||| Tyrosine-protein kinase Yes	27.6656	27.7939	27.4473	27.538	27.9782	27.9778	27.9789	27.9332	27.9563	27.9133	28.1026	28.0667	28.2294	28.1763	28.1843	28.056	28.4388	28.2292	27.7297	27.4926	27.978	27.956	27.9348	28.0847	28.2029	28.1202	28.334	27.7335	27.9918	28.219	0.258358
ph_P29317:772	P29317	0	0	0	3.42467e-272	2	0.10092	1;2	0.969341	VLEDDPEAT(0.009)Y(0.969)T(0.018)T(0.003)S(0.001)GGK	772	Y	1969	EPHA2	ARCC2 CTPA CTPP1 CTRCT6 ECK	protein-coding	1p36.13	EPH receptor A2 ||| Ephrin type-A receptor 2	25.1551	25.095	25.2466	24.9011	25.5697	25.2549	25.4382	25.281	25.6935	25.3268	25.6155	25.3525	25.7983	25.5319	25.732	25.3381	25.8598	25.5793	25.125	25.0738	25.4123	25.3596	25.5102	25.484	25.6651	25.5351	25.7196	25.2037	25.4513	25.6399	0.247529
ph_P63104:128	P63104	0	0	0	5.27582e-05	2	-0.20705	1	1	Y(1)LAEVAAGDDKK	128	Y	7534	YWHAZ	14-3-3-zeta HEL-S-3 HEL-S-93 HEL4 KCIP-1 POPCHAS YWHAD	protein-coding	8q22.3	tyrosine 3-monooxygenase/tryptophan 5-monooxygenase activation protein zeta ||| 14-3-3 protein zeta/delta	18.3615	19.1051	18.1176		18.0567	18.6747		18.5654	19.3207	19.0701		18.9725		19.1267	19.096	18.8584	19.1648	18.8922	18.7333	18.1176	18.3657	18.5654	19.1954	18.9725	19.1267	18.9772	19.0285	18.4055	18.9111	19.0441	0.505561
ph_P28482:185	P28482	0	0	0	1.25423e-189	3	-0.085337	1;2	0.999901	VADPDHDHTGFLT(1)EY(0.998)VAT(0.002)R	185	T	5594	MAPK1	ERK ERK-2 ERK2 ERT1 MAPK2 P42MAPK PRKM1 PRKM2 p38 p40 p41 p41mapk p42-MAPK	protein-coding	22q11.22	mitogen-activated protein kinase 1	24.7231	23.8429	24.5365	23.7611	23.5475	23.5821	23.7597	23.7366	23.5228	23.4533	24.5537	24.5698	25.5095	24.7696	24.4039	24.6652	24.5782	24.5155	24.283	24.1488	23.5648	23.7482	23.488	24.5617	25.1396	24.5346	24.5468	23.9989	23.9326	24.7403	-0.0662383
ph_Q00535:15	Q00535	0	0	0	1.95932e-08	2	-0.1277	1	0.99477	IGEGT(0.002)Y(0.995)GT(0.003)VFK	15	Y	1020	CDK5	LIS7 PSSALRE	protein-coding	7q36.1	cyclin dependent kinase 5 ||| Cyclin-dependent-like kinase 5	22.0789	22.2743	22.2041	22.5791	22.5376	22.5045	23.028	22.9799	22.4437	22.8633	22.8996	22.9933	22.6688	23.0313	22.799	22.8791	22.7017	23.0017	22.1766	22.3916	22.5211	23.004	22.6535	22.9465	22.8501	22.8391	22.8517	22.3631	22.868	22.8469	0.50489
ph_P08670:53	P08670	0	0	0	1.69599e-75	2	-0.5904	1	0.999877	SLY(1)ASSPGGVYATR	53	Y	7431	VIM	---	protein-coding	10p13	vimentin	22.9643	22.9519		22.6856	23.2783	23.1033	22.9678	22.865	23.029	22.7966	23.2057	23.0158	23.4086	23.2703	23.3366	23.3473	23.5191	23.4425	22.9581	22.6856	23.1908	22.9164	22.9128	23.1107	23.3395	23.342	23.4808	22.9448	22.98	23.3874	0.0351389
ph_P49023:88	P49023	0	0	0	9.5337e-53	3	-0.39241	1;2	0.969245	FIHQQPQSSSPVY(0.969)GS(0.023)S(0.008)AK	88	Y	5829	PXN	---	protein-coding	12q24.23	paxillin	25.1552	25.0545	25.1623	24.9908	25.6453	25.3577	25.3505	25.2035	25.334	25.153	25.4945	25.373	25.5652	25.6729	25.7233	25.4363	25.8426	25.6809	25.1048	25.0765	25.5015	25.277	25.2435	25.4337	25.6191	25.5798	25.7617	25.2276	25.3181	25.6535	0.0904626
ph_O75815:212	O75815	0	0	0	0.0022757	2	0.56193	1	0.9738	LSEAY(0.974)S(0.026)R	212	Y	8412	BCAR3	AND-34 NSP2 SH2D3B	protein-coding	1p22.1	BCAR3 adaptor protein, NSP family member ||| Breast cancer anti-estrogen resistance protein 3	21.5834	21.833	21.3979		21.7764		22.0671		21.3585	21.3952	22.2394	22.3782	22.0347	22.4463	22.0496		22.274	22.2777	21.7082	21.3979	21.7764	22.0671	21.3769	22.3088	22.2405	22.0496	22.2759	21.6275	21.9176	22.1886	0.290107
ph_Q07912:827	Q07912	0	0	0	6.8915e-104	2	-0.36415	1	0.999996	Y(1)ATPQVIQAPGPR	827	Y	10188	TNK2	ACK ACK-1 ACK1 p21cdc42Hs	protein-coding	3q29	tyrosine kinase non receptor 2 ||| Activated CDC42 kinase 1	24.2022	24.2609	24.6032	24.0092	24.8746	24.7631	24.939	24.8061	25.0105	25.1064	25.2063	25.1388	25.0605	24.8374	25.1263	25.1436	25.1201	24.8058	24.2315	24.3062	24.8188	24.8726	25.0584	25.1725	24.949	25.1349	24.9629	24.4522	25.0345	25.0156	0.582336
ph_O43781:369	O43781	0	0	0	3.74232e-08	2	-0.26737	1	0.974014	LYT(0.026)Y(0.974)IQSR	369	Y	8444	DYRK3	DYRK5 RED REDK hYAK3-2	protein-coding	1q32.1	dual specificity tyrosine phosphorylation regulated kinase 3 ||| Dual specificity tyrosine-phosphorylation-regulated kinase 3	20.2018	20.7957	20.2959		20.7644	21.0202	20.8962	20.9852	20.64	20.9177			21.0392	21.4555	20.8779	20.8838		21.0978	20.4987	20.2959	20.8923	20.9407	20.7789	NA	21.2474	20.8808	21.0978	20.5623	20.8598	21.0753	0.297458
ph_P08670:61	P08670	0	0	0	1.22838e-36	2	0.91195	1;2	0.931929	S(0.005)LY(0.082)AS(0.457)S(0.457)PGGVY(0.932)AT(0.067)R	61	Y	7431	VIM	---	protein-coding	10p13	vimentin	24.8961		24.9543	24.8676		19.1465	19.962					17.6308	25.1388		25.0521		25.227		24.8961	24.9109	19.1465	19.962	NA	17.6308	25.1388	25.0521	25.227	22.9845	18.7964	25.1393	-4.18815
ph_Q9Y5Y0:22	Q9Y5Y0	0	0	0	1.53648e-05	2	0.27074	1	1	GY(1)LPLPR	22	Y	28982	FLVCR1	AXPC1 FLVCR MFSD7B PCA PCARP SLC49A1	protein-coding	1q32.3	FLVCR heme transporter 1 ||| Feline leukemia virus subgroup C receptor-related protein 1	20.6717	21.2934	21.0289	21.1415	21.1254	21.4356	21.267	21.5948	21.2248	21.5736	21.5063	21.744	21.1878	21.9423	21.4058	21.6475	21.3517	21.5154	20.9826	21.0852	21.2805	21.4309	21.3992	21.6252	21.5651	21.5267	21.4335	21.1161	21.4851	21.5084	0.368994
ph_Q9H422:359	Q9H422	0	0	0	8.9623e-34	2	-0.35245	1	0.998976	TVCST(0.001)Y(0.999)LQSR	359	Y	10114	HIPK3	DYRK6 FIST3 PKY YAK1	protein-coding	11p13	homeodomain interacting protein kinase 3 ||| Homeodomain-interacting protein kinase 3	23.7598	23.9169	23.6133	23.6021	23.8199	23.869	23.729	23.6994	23.6021	23.4658	23.8595	23.949	24.0171	24.1403	24.2712	24.085	24.2852	24.1473	23.8384	23.6077	23.8444	23.7142	23.5339	23.9042	24.0787	24.1781	24.2163	23.7635	23.7175	24.1577	-0.0460435
ph_Q08211:148	Q08211	0	0	0	0.000928409	2	0.54011	1	0.675261	GANLKDY(0.675)Y(0.176)S(0.149)R	148	Y	1660	DHX9	DDX9 LKP NDH2 NDHII RHA	protein-coding	1q25.3	DExH-box helicase 9 ||| ATP-dependent RNA helicase A	18.8863	18.2963	19.1911					19.0402	19.7235	19.7602	19.7453	19.6763	19.9537	19.2184	19.6791	19.7827	19.5869	19.7473	18.5913	19.1911	NA	19.0402	19.7418	19.7108	19.5861	19.7309	19.6671	18.8912	19.4976	19.6614	0.606438
ph_Q93052:317	Q93052	0	0	0	6.38488e-08	3	-0.362	1	0.75297	NDS(0.006)DPT(0.24)Y(0.753)GQQGHPNT(0.001)WKR	317	Y	4026	LPP	---	protein-coding	3q27.3-q28	LIM domain containing preferred translocation partner in lipoma ||| Lipoma-preferred partner	19.6986	19.6423	19.8482		19.7241	19.8042	19.8144	19.3059	20.1623	19.5995	19.7848	19.6987	20.0689	20.3842	20.2628	20.1564	20.1988	19.7543	19.6704	19.8482	19.7642	19.5602	19.8809	19.7417	20.2266	20.2096	19.9765	19.7609	19.7276	20.1376	-0.0333366
ph_Q07955:187	Q07955	0	0	0	0.00718041	2	0.71666	1	0.553551	SHEGET(0.554)AY(0.446)IR	187	T	6426	SRSF1	ASF SF2 SF2p33 SFRS1 SRp30a	protein-coding	17q22	serine and arginine rich splicing factor 1 ||| Serine/arginine-rich splicing factor 1			18.0583	18.0386		18.4034	19.3362	18.903	19.1022	18.6926				18.8158	18.8117	18.6437	19.0763		NA	18.0484	18.4034	19.1196	18.8974	NA	18.8158	18.7277	19.0763	18.2259	19.0085	18.8732	0.782599
ph_Q9H2X6:361	Q9H2X6	0	0	0	2.47345e-129	2	-0.12129	1	0.999977	AVCSTY(1)LQSR	361	Y	204851 28996	HIPK1 HIPK2	Myak Nbak2 PRO0593	protein-coding	1p13.2!7q34	homeodomain interacting protein kinase 1 ||| Homeodomain-interacting protein kinase 1 ||| homeodomain interacting protein kinase 2 ||| Homeodomain-interacting protein kinase 2	25.4153	25.5984	25.5124	25.4461	25.8915	25.8738	25.8511	25.8123	25.6684	25.5973	25.9905	25.9277	25.8869	25.9284	26.0333	25.9774	26.3689	26.1534	25.5069	25.4792	25.8826	25.8317	25.6329	25.9591	25.9076	26.0054	26.2611	25.6229	25.8079	26.0581	0.184963
ph_Q13573:176	Q13573	0	0	0	0.000456185	2	-2.8637	1	1	AADKLAPAQY(1)IR	176	Y	22938	SNW1	Bx42 FUN20 NCOA-62 PRPF45 Prp45 SKIIP SKIP SKIP1	protein-coding	14q24.3	SNW domain containing 1 ||| SNW domain-containing protein 1	18.8451	18.564		18.3507	18.9809	18.6546	18.9673	18.3054		18.7767	19.316	18.9889	18.8264	19.3873	19.2428	18.9868		19.0859	18.7045	18.3507	18.8177	18.6364	18.7767	19.1525	19.1068	19.1148	19.0859	18.6243	18.8552	19.1025	0.230845
ph_O60641:15	O60641	0	0	0	9.02112e-12	2	1.1204	1	0.951391	IAAAQY(0.951)S(0.045)VT(0.003)GS(0.001)AVAR	15	Y	9892	SNAP91	AP180 CALM	protein-coding	6q14.2	synaptosome associated protein 91 ||| Clathrin coat assembly protein AP180	19.3587		20.0533			19.4731			19.9164	19.949	19.9584		20.2347	19.9039			20.3835	19.9151	19.3587	20.0533	19.4731	NA	19.9327	19.9584	20.0693	NA	20.1493	19.6283	19.9456	20.1093	0.317251
ph_Q05397:570	Q05397	0	0	0	3.48289e-41	2	0.34637	1;2	1	Y(1)MEDSTYYKASK	570	Y	5747	PTK2	FADK FAK FAK1 FRNK PPP1R71 p125FAK pp125FAK	protein-coding	8q24.3	protein tyrosine kinase 2 ||| Focal adhesion kinase 1	20.655	20.1045	21.1714	19.314	20.1998	20.622	20.0594	21.0431	21.289	21.2299	21.1776	20.913	21.1847	20.0886	20.7667	20.7351	21.3772	20.9884	20.3797	20.2427	20.4109	20.5513	21.2594	21.0453	20.6367	20.7509	21.1828	20.3444	20.952	20.8568	0.60756
ph_P09651:347	P09651	0	0	0	1.22659e-26	3	-0.10961	1	0.999998	SSGPYGGGGQY(1)FAKPR	347	Y	3178	HNRNPA1	ALS19 ALS20 HNRPA1 HNRPA1L3 IBMPFD3 UP-1 hnRNP-A1	protein-coding	12q13.13	heterogeneous nuclear ribonucleoprotein A1	22.2935	22.5691	22.623	22.5658	22.7829	22.6478		22.6723	22.8429	22.7222	23.1442	22.8614	22.6696	22.9588	22.9326	22.8837	23.2944	23.076	22.4313	22.5944	22.7154	22.6723	22.7825	23.0028	22.8142	22.9082	23.1852	22.5804	22.8192	22.9692	0.238849
ph_P61978:323	P61978	0	0	0	0.000818599	2	0.23288	1	1	GGDLMAY(1)DRR	323	Y	3190	HNRNPK	AUKS CSBP HNRPK TUNP	protein-coding	9q21.32	heterogeneous nuclear ribonucleoprotein K	18.8285	19.1338	19.2201	19.0349	19.3404	19.3769	19.1098		19.5354	19.8556	19.7933		19.3611		19.9101	19.9597	19.6785		18.9811	19.1275	19.3586	19.1098	19.6955	19.7933	19.3611	19.9349	19.6785	19.1558	19.5329	19.6582	0.377123
ph_P08670:30	P08670	0	0	0	1.17625e-08	2	0.72207	1	0.904099	S(0.096)Y(0.904)VTTSTR	30	Y	7431	VIM	---	protein-coding	10p13	vimentin	22.3071	22.4478	22.5362	22.3622	22.459		22.586	23.1006	22.2137	22.1093	22.7135	22.9221	22.6945	22.714	22.9665	23.0196	23.0534	22.7871	22.3774	22.4492	22.459	22.8433	22.1615	22.8178	22.7042	22.9931	22.9202	22.4285	22.6075	22.8725	0.17899
ph_O00148;Q13838:38;39	O00148;Q13838	0	0	0	0.000181201	2	-0.074476	1	0.832319	GS(0.167)Y(0.832)VS(0.001)IHSSGFR	38;39	Y	10212 7919	DDX39A DDX39B	BAT1 BAT1L DDX39 DDXL URH49 D6S81E UAP56	protein-coding	19p13.12!6p21.33	DExD-box helicase 39A ||| ATP-dependent RNA helicase DDX39A ||| DExD-box helicase 39B ||| Spliceosome RNA helicase DDX39B	20.3658	20.3512	20.27	20.038	20.3841	20.1728	20.089	20.1293	20.2176	20.2213	20.376	20.191	20.5715	20.3322		20.6388	20.5507		20.3585	20.154	20.2784	20.1091	20.2195	20.2835	20.4518	20.6388	20.5507	20.2637	20.204	20.5471	-0.0596308
ph_Q9NWQ8:341	Q9NWQ8	0	0	0	1.88793e-54	3	0.62797	1	0.907818	S(0.001)GQS(0.004)LT(0.005)VPES(0.003)T(0.011)Y(0.908)T(0.053)S(0.015)IQGDPQR	341	Y	55824	PAG1	CBP PAG	protein-coding	8q21.13	phosphoprotein membrane anchor with glycosphingolipid microdomains 1 ||| Phosphoprotein associated with glycosphingolipid-enriched microdomains 1	23.0915	23.3468		23.4132		23.0811		23.1579	23.3455	22.9563	23.338	22.9152	24.2203		23.6045	23.3991	23.8349	23.4868	23.2192	23.4132	23.0811	23.1579	23.1509	23.1266	24.2203	23.5018	23.6608	23.2378	23.1451	23.7943	-0.0927
ph_O76039:171	O76039	0	0	0	5.18509e-11	2	0.27294	1	0.912727	NLSEGNNANY(0.004)T(0.014)EY(0.913)VAT(0.069)R	171	Y	6792	CDKL5	CFAP247 EIEE2 ISSX STK9	protein-coding	Xp22.13	cyclin dependent kinase like 5 ||| Cyclin-dependent kinase-like 5		19.2892	19.5904	19.1532					19.6116		19.9969			19.7238	19.904	19.7533			19.2892	19.3718	NA	NA	19.6116	19.9969	19.7238	19.8286	NA	19.3305	19.8042	19.7762	0.473759
ph_P27986:467	P27986	0	0	0	0	3	0.23835	1	1	SREYDRLY(1)EEYTR	467	Y	5295	PIK3R1	AGM7 GRB1 IMD36 p85 p85-ALPHA	protein-coding	5q13.1	phosphoinositide-3-kinase regulatory subunit 1 ||| Phosphatidylinositol 3-kinase regulatory subunit alpha	21.3324	21.339	21.3526	20.4012	21.5901	21.318	21.3182	21.5042	21.7807	21.3163	21.6088	21.1806	21.8286	21.3004	21.7246	21.8939	21.6876	21.4165	21.3357	20.8769	21.4541	21.4112	21.5485	21.3947	21.5645	21.8093	21.552	21.2222	21.4515	21.6419	0.22927
ph_Q92569:199	Q92569	0	0	0	1.29809e-26	2	-0.33272	1	0.999921	EYDRLY(1)EEYTR	199	Y	8503	PIK3R3	p55 p55-GAMMA p55PIK	protein-coding	1p34.1	phosphoinositide-3-kinase regulatory subunit 3 ||| Phosphatidylinositol 3-kinase regulatory subunit gamma	21.3324	21.339	21.3526	20.4012	21.5901	21.318	21.3182	21.5042	21.7807	21.3163	21.6088	21.1806	21.8286	21.3004	21.7246	21.8939	21.6876	21.4165	21.3357	20.8769	21.4541	21.4112	21.5485	21.3947	21.5645	21.8093	21.552	21.2222	21.4515	21.6419	0.22927
ph_O43707;P12814:265;246	O43707;P12814	0	0	0	2.84368e-15	3	-0.15875	1	0.980072	AIMTYVS(0.001)S(0.014)FY(0.98)HAFS(0.005)GAQK	265;246	Y	87 81	ACTN1 ACTN4	BDPLT15 ACTININ-4 FSGS FSGS1	protein-coding	14q24.1!14q22-q24!19q13.2	actinin alpha 1 ||| Alpha-actinin-1 ||| actinin alpha 4 ||| Alpha-actinin-4	17.3417	18.3396	17.1866	17.6701		18.6127		18.6272		16.4357	18.2889	18.6926	18.5697					18.8717	17.8407	17.4283	18.6127	18.6272	16.4357	18.4908	18.5697	NA	18.8717	17.9606	17.8512	18.7207	-0.109328
ph_P56945:128	P56945	0	0	0	4.3462e-41	3	-0.34865	1	1	AQQGLY(1)QVPGPSPQFQSPPAK	128	Y	9564	BCAR1	CAS CAS1 CASS1 CRKAS P130Cas	protein-coding	16q23.1	BCAR1 scaffold protein, Cas family member ||| Breast cancer anti-estrogen resistance protein 1			21.4406	21.685	21.5392	21.6227	21.3637	21.6703	21.4203	21.4356	21.8744	21.9688	21.7021	22.1226	21.7488	21.9471	22.1144	22.1987	NA	21.5628	21.5809	21.517	21.4279	21.9216	21.9124	21.8479	22.1566	21.5719	21.6222	21.9723	0.0503065
ph_Q9NZM3:968	Q9NZM3	0	0	0	6.14956e-09	2	0.9311	1	1	REEPEALY(1)AAVNK	968	Y	50618	ITSN2	PRO2015 SH3D1B SH3P18 SWA SWAP	protein-coding	2p23.3	intersectin 2 ||| Intersectin-2	19.4987	19.5307	20.155	19.9306		20.3894	19.9622	19.8487	20.724	20.5589	20.5019		20.6926	20.3123	20.6511	20.6539	20.5679	20.3689	19.5147	20.0428	20.3894	19.9054	20.6415	20.5019	20.5025	20.6525	20.4684	19.9823	20.3496	20.5411	0.367303
ph_Q05655:334	Q05655	0	0	0	1.66335e-59	3	0.22683	1	0.978409	KTGVAGEDMQDNS(0.011)GT(0.011)Y(0.978)GKIWEGSSK	334	Y	5580	PRKCD	ALPS3 CVID9 MAY1 PKCD nPKC-delta	protein-coding	3p21.1	protein kinase C delta ||| Protein kinase C delta type		20.7827	20.9104	20.7181	21.1639		20.8522	20.7606		21.2563		20.6337	21.5263	21.049	21.4051				20.7827	20.8143	21.1639	20.8064	21.2563	20.6337	21.2877	21.4051	NA	20.9203	20.8988	21.3464	-0.021457
ph_Q9NWQ8:417	Q9NWQ8	0	0	0	1.97071e-67	2	0.75222	1	1	ENDY(1)ESISDLQQGR	417	Y	55824	PAG1	CBP PAG	protein-coding	8q21.13	phosphoprotein membrane anchor with glycosphingolipid microdomains 1 ||| Phosphoprotein associated with glycosphingolipid-enriched microdomains 1	21.2681	21.492	21.5255	20.9333	21.8465	21.2698	21.4123	21.314	21.5602	21.1393	21.4404	21.3845	21.9209	21.5658	21.7448	21.5541	21.7814	21.4469	21.3801	21.2294	21.5581	21.3632	21.3498	21.4124	21.7434	21.6494	21.6142	21.3892	21.3751	21.669	-0.0140714
ph_Q9BV38:61	Q9BV38	0	0	0	0.000240784	2	0.94824	1	0.999965	NY(1)ISAWELQR	61	Y	57418	WDR18	Ipi3 R32184_1	protein-coding	19p13.3	WD repeat domain 18 ||| WD repeat-containing protein 18	17.8495	18.1155			18.4269	18.8892		18.9106	18.3956	18.806	18.6787	19.2775	18.9093		18.9523	19.1449	18.9454		17.9825	NA	18.6581	18.9106	18.6008	18.9781	18.9093	19.0486	18.9454	18.3203	18.8298	18.9678	0.509539
ph_Q15056:12	Q15056	0	0	0	0.00110325	2	-0.76782	1	0.999461	AY(0.999)S(0.001)SFGGGR	12	Y	7458	EIF4H	WBSCR1 WSCR1 eIF-4H	protein-coding	7q11.23	eukaryotic translation initiation factor 4H	18.9043	19.3269	19.5013	19.8333	19.6361	19.5594	18.9086	18.964	19.7706	19.9457	19.7742	19.7509	19.2646	20.0972	20.1409	20.0211	20.2084	20.0454	19.1156	19.6673	19.5977	18.9363	19.8581	19.7625	19.6809	20.081	20.1269	19.4602	19.519	19.9629	0.0587767
ph_P09651:357	P09651	0	0	0	2.81208e-20	2	0.11259	1	0.997042	NQGGY(0.997)GGS(0.002)S(0.001)SSSSYGSGR	357	Y	3178	HNRNPA1	ALS19 ALS20 HNRPA1 HNRPA1L3 IBMPFD3 UP-1 hnRNP-A1	protein-coding	12q13.13	heterogeneous nuclear ribonucleoprotein A1	20.5776				20.7124		20.9902		20.7071	20.1514	21.134	20.7834	20.8358		21.1925		21.4851	20.7322	20.5776	NA	20.7124	20.9902	20.4293	20.9587	20.8358	21.1925	21.1086	20.645	20.7927	21.0457	0.147746
ph_Q9NR20:264	Q9NR20	0	0	0	1.17536e-37	2	0.28863	1	0.99996	VYTY(1)IQSR	264	Y	8445 8798	DYRK2 DYRK4	---	protein-coding	12q15!12p13.32	dual specificity tyrosine phosphorylation regulated kinase 2 ||| Dual specificity tyrosine-phosphorylation-regulated kinase 2 ||| dual specificity tyrosine phosphorylation regulated kinase 4 ||| Dual specificity tyrosine-phosphorylation-regulated kinase 4	23.4859	23.6616	23.4397	23.4081	23.6962	23.8797	23.8964	24.6847	24.7031	23.5124	23.9261	23.8566	23.96	23.9404	23.9486	23.9357	23.972	24.0202	23.5738	23.4239	23.788	24.2905	24.1077	23.8913	23.9502	23.9421	23.9961	23.5952	24.0965	23.9628	0.501337
ph_P29317:575	P29317	0	0	0	5.05536e-35	2	3.8773	1	0.999817	ARQSPEDVY(1)FSK	575	Y	1969	EPHA2	ARCC2 CTPA CTPP1 CTRCT6 ECK	protein-coding	1p36.13	EPH receptor A2 ||| Ephrin type-A receptor 2	21.7598	21.8523	21.9701	21.8196	22.07	22.0184	22.0505	22.063	22.1239	22.1566	22.0093	22.0738	22.2752	22.1348	22.0255	22.3048	22.2077	22.0854	21.8061	21.8948	22.0442	22.0568	22.1402	22.0415	22.205	22.1651	22.1465	21.915	22.0795	22.1722	0.164488
ph_P49023:118	P49023	0	0	0	0	2	0.36532	1	0.998933	VGEEEHVY(0.999)S(0.001)FPNKQK	118	Y	5829	PXN	---	protein-coding	12q24.23	paxillin	22.5328	22.782	22.9044	22.7825	22.9652	22.8402	22.5123	22.3062	23.0891	22.9661	23.3019	22.771	23.2822	22.9483	23.4746	23.1302	23.1687	22.9886	22.6574	22.8435	22.9027	22.4093	23.0276	23.0364	23.1153	23.3024	23.0786	22.8012	22.8244	23.1654	0.0232482
ph_P63261:198	P63261	0	0	0	0.000319012	2	-0.30356	1	0.999589	GY(1)SFTTTAER	198	Y	60 71	ACTB ACTG1	BRWS1 PS1TP5BP1 ACT ACTG DFNA20 DFNA26 HEL-176	protein-coding	7p22.1!17q25.3	actin beta ||| Actin, cytoplasmic 1 ||| actin gamma 1 ||| Actin, cytoplasmic 2	18.1314		18.3097		18.8616	18.7992	18.6933		18.7753	19.0139	19.2227		18.6037		19.2036	19.3359	18.7986	18.883	18.1314	18.3097	18.8304	18.6933	18.8946	19.2227	18.6037	19.2698	18.8408	18.4238	18.9369	18.9047	0.513055
ph_Q99623:248	Q99623	0	0	0	1.72938e-14	2	0.90391	1	0.999997	MLGEALSKNPGY(1)IK	248	Y	11331	PHB2	BAP BCAP37 Bap37 PNAS-141 REA hBAP p22	protein-coding	12p13.31	prohibitin 2 ||| Prohibitin-2	20.2593	20.2298	20.094		20.4559	20.2077	20.5154	20.413	20.121	20.1293	20.2664	20.1058	20.8038	20.3739	20.4772	20.5539	20.5429	20.4449	20.2445	20.094	20.3318	20.4642	20.1252	20.1861	20.5888	20.5155	20.4939	20.2234	20.2585	20.5328	0.0350308
ph_P0DP25:100	P0DP25	0	0	0	3.05064e-34	3	0.036819	1	0.999835	VFDKDGNGY(1)ISAAELR	100	Y	801 805 808	CALM1 CALM2 CALM3	CALML2 CAM2 CAM3 CAMB CAMC CAMI CAMIII CPVT4 DD132 LQT14 PHKD caM CALM CAM1 CAMII LQT15 PHKD2 CaM CaMIII HEL-S-72 PHKD3	protein-coding	14q32.11!2p21!19q13.32	calmodulin 1 ||| calmodulin 2 ||| calmodulin 3 ||| Calmodulin-1 ||| Calmodulin-2 ||| Calmodulin-3	20.5916	20.541	20.4428	20.1698	20.7508	20.2745	20.4817	20.1994	20.5893	20.0093	20.8402	20.1861	21.2959	20.5894	20.9517	20.8952	20.7788	20.393	20.5663	20.3063	20.5127	20.3405	20.2993	20.5131	20.9427	20.9234	20.5859	20.4617	20.3843	20.8173	-0.0774312
ph_P08670:117	P08670	0	0	0	1.2269e-14	2	-0.17207	1	1	FANY(1)IDKVR	117	Y	7431	VIM	---	protein-coding	10p13	vimentin	20.7964	21.1832	21.1943	21.3108	21.7713	21.7714	21.7816	21.8525	21.9522	22.0959	22.1272	22.1235	21.8047	21.7578	21.8487	22.0915	21.9797	21.6887	20.9898	21.2526	21.7713	21.817	22.024	22.1254	21.7812	21.9701	21.8342	21.3379	21.9888	21.8618	0.650906
ph_P29317:771	P29317	0	0	0	4.32615e-190	3	0.36894	1;2	0.907096	VLEDDPEAT(0.907)Y(0.074)T(0.019)TSGGKIPIR	771	T	1969	EPHA2	ARCC2 CTPA CTPP1 CTRCT6 ECK	protein-coding	1p36.13	EPH receptor A2 ||| Ephrin type-A receptor 2		29.7784		29.5092		19.7039		29.9685	29.6761	29.7348	30.0041	29.9913	30.069	19.5411					29.7784	29.5092	19.7039	29.9685	29.7055	29.9977	24.8051	NA	NA	26.3305	29.8906	24.8051	3.56005
ph_Q96J84:721	Q96J84	0	0	0	8.3575e-49	2	0.39919	1	0.999918	TPY(1)EAYDPIGK	721	Y	55243	KIRREL1	KIRREL NEPH1	protein-coding	1q23.1	kirre like nephrin family adhesion molecule 1 ||| Kin of IRRE-like protein 1	21.1446	21.3114	21.3217	21.2796	21.7103	21.7752	21.3095	21.3521	21.6065	21.6459	21.5017	21.6598	21.6139	21.6658	21.7627	22.0911	21.7987	21.7324	21.228	21.3006	21.7427	21.3308	21.6262	21.5808	21.6398	21.9269	21.7655	21.4238	21.5126	21.7774	0.0887978
ph_P08670:63	P08670	0	0	0	1.1272e-35	2	0.056832	1;2	0.947475	SLYASS(0.003)PGGVY(0.049)AT(0.947)R	63	T	7431	VIM	---	protein-coding	10p13	vimentin		24.8133			25.0103	24.7597	24.8275	24.8166	24.8117	24.785	25.0051	24.9269		24.963		25.1997		25.2152	24.8133	NA	24.885	24.822	24.7983	24.966	24.963	25.1997	25.2152	24.8492	24.8621	25.126	0.0129536
ph_O43399:106	O43399	0	0	0	3.50586e-12	2	-0.10135	1	0.996528	SWHDVQVS(0.001)S(0.003)AY(0.997)VK	106	Y	7165	TPD52L2	D54 TPD54	protein-coding	20q13.33	TPD52 like 2 ||| Tumor protein D54	20.2405	20.1	20.1459	20.2181	19.9916	19.9211	20.0315		20.4499	20.5057	20.1333	20.3167	20.6614	20.128	19.9957	20.5826	20.5951	20.4871	20.1702	20.182	19.9563	20.0315	20.4778	20.225	20.3947	20.2891	20.5411	20.1028	20.2448	20.4083	0.141943
ph_P11413:401	P11413	0	0	0	0.000665078	2	1.4654	1	0.949824	VQPNEAVY(0.95)T(0.05)K	401	Y	2539	G6PD	G6PD1	protein-coding	Xq28	glucose-6-phosphate dehydrogenase ||| Glucose-6-phosphate 1-dehydrogenase		20.5796	20.6845	20.6641	20.8362	20.7237			20.9669	20.8449	20.8679		20.7838	20.7801	21.0816	20.87	21.098	20.9247	20.5796	20.6743	20.7799	NA	20.9059	20.8679	20.782	20.9758	21.0114	20.678	20.8869	20.9231	0.208914
ph_Q15375:791	Q15375	0	0	0	3.49008e-27	3	-0.94794	1	0.941572	VIEDDPEAVY(0.942)T(0.045)T(0.011)T(0.003)GGKIPVR	791	Y	2045	EPHA7	EHK-3 EHK3 EK11 HEK11	protein-coding	6q16.1	EPH receptor A7 ||| Ephrin type-A receptor 7	22.4603	22.223	22.3359	22.3409	22.8025	22.6688	22.3795	22.5463	22.3596	22.0322	22.7896	22.674	22.7863	22.7473	22.6649	22.691	23.0377	22.9138	22.3417	22.3384	22.7356	22.4629	22.1959	22.7318	22.7668	22.6779	22.9758	22.4719	22.4635	22.8068	-0.00836342
ph_Q9NWQ8:359	Q9NWQ8	0	0	0	4.72569e-195	2	-0.67375	1	0.999969	SPSSCNDLY(1)ATVK	359	Y	55824	PAG1	CBP PAG	protein-coding	8q21.13	phosphoprotein membrane anchor with glycosphingolipid microdomains 1 ||| Phosphoprotein associated with glycosphingolipid-enriched microdomains 1	22.7717	22.9142	23.22	22.9197	23.3349	23.0739	23.0925	22.9501	23.6855	23.513	23.4638	23.1693	23.4016	23.1945	23.492	23.2702	23.6065	23.2279	22.8429	23.0698	23.2044	23.0213	23.5992	23.3165	23.298	23.3811	23.4172	23.039	23.3124	23.3654	0.273305
ph_P61313:59	P61313	0	0	0	0.00133252	2	0.50521	1	0.99972	QGY(1)VIYR	59	Y	6138	RPL15	DBA12 EC45 L15 RPL10 RPLY10 RPYL10	protein-coding	3p24.2	ribosomal protein L15 ||| 60S ribosomal protein L15	18.9922	19.2457	19.5254	19.132	19.6861	19.9893		19.9313	19.4984	19.2651	19.7893	19.7464	19.469	19.874	20.0155	19.9677		19.7719	19.119	19.3287	19.8377	19.9313	19.3818	19.7678	19.6715	19.9916	19.7719	19.4284	19.6936	19.8117	0.265192
ph_P07947:223	P07947	0	0	0	3.34345e-41	2	0.1421	1	0.863649	KLDNGGY(0.048)Y(0.864)IT(0.072)T(0.017)R	223	Y	2534 7525	FYN YES1	SLK SYN p59-FYN HsT441 P61-YES Yes c-yes	protein-coding	6q21!18p11.32	FYN proto-oncogene, Src family tyrosine kinase ||| Tyrosine-protein kinase Fyn ||| YES proto-oncogene 1, Src family tyrosine kinase ||| Tyrosine-protein kinase Yes		21.3128	21.6638	21.2164	21.8078		22.0296		21.8416	21.755	21.9962	21.7668	21.8285		21.9668		21.8855	21.5817	21.3128	21.4401	21.8078	22.0296	21.7983	21.8815	21.8285	21.9668	21.7336	21.5202	21.9031	21.843	0.382893
ph_P49023:119	P49023	0	0	0	8.14895e-07	3	0.11229	1	0.677411	VGEEEHVY(0.323)S(0.677)FPNK	119	S	5829	PXN	---	protein-coding	12q24.23	paxillin	21.8731			22.4454	22.5651		22.2426	21.9199		22.7015		22.4856		22.7159	22.8246	22.7444	22.4867	22.5165	21.8731	22.4454	22.5651	22.0813	22.7015	22.4856	22.7159	22.7845	22.5016	22.2945	22.4228	22.6673	0.128272
ph_Q8TEW0:388	Q8TEW0	0	0	0	0.000310363	2	-0.31417	1	0.776214	FSPDS(0.224)QY(0.776)IDNR	388	Y	56288	PARD3	ASIP Baz PAR3 PAR3alpha PARD-3 PARD3A PPP1R118 SE2-5L16 SE2-5LT1 SE2-5T2	protein-coding	10p11.22-p11.21	par-3 family cell polarity regulator ||| Partitioning defective 3 homolog	20.0899		19.8749	20.1417	20.1256	19.9276		19.956		19.6664		19.7927	20.3098				20.455	20.0177	20.0899	20.0083	20.0266	19.956	19.6664	19.7927	20.3098	NA	20.2364	20.0416	19.805	20.2731	-0.236538
ph_Q06830:194	Q06830	0	0	0	5.42442e-07	2	-0.1129	1	0.995966	SKEY(0.996)FS(0.004)K	194	Y	5052	PRDX1	MSP23 NKEF-A NKEFA PAG PAGA PAGB PRX1 PRXI TDPX2	protein-coding	1p34.1	peroxiredoxin 1 ||| Peroxiredoxin-1	20.9176	21.3852	21.1665	21.3398	20.8628	21.0294	18.656						21.2614	21.6386	21.5796	21.8217	21.7538	21.6791	21.1514	21.2531	20.9461	18.656	NA	NA	21.45	21.7007	21.7165	21.1169	18.656	21.6224	-2.46088
ph_P07947:222	P07947	0	0	0	3.30923e-220	2	0.050345	1	0.999915	KLDNGGY(1)YITTR	222	Y	2534 7525	FYN YES1	SLK SYN p59-FYN HsT441 P61-YES Yes c-yes	protein-coding	6q21!18p11.32	FYN proto-oncogene, Src family tyrosine kinase ||| Tyrosine-protein kinase Fyn ||| YES proto-oncogene 1, Src family tyrosine kinase ||| Tyrosine-protein kinase Yes	23.5327	23.6283	23.5337	23.2711	23.8176	23.6581	24.1608	23.9827	23.832	23.8069	24.0557		24.0013	23.7024	23.9606	23.814	23.9038	23.5948	23.5805	23.4024	23.7379	24.0717	23.8195	24.0557	23.8518	23.8873	23.7493	23.5736	23.9823	23.8295	0.408714
ph_P40189:915	P40189	0	0	0	0.00634436	1	-0.27871	---	1	QGGY(1)MPQ	915	Y	3572	IL6ST	CD130 CDW130 GP130 HIES4 IL-6RB sGP130	protein-coding	5q11.2	interleukin 6 signal transducer ||| Interleukin-6 receptor subunit beta	19.2233		19.1823	18.8635	19.1971	19.1982	19.2697		19.0651	19.0841	19.6997	19.5302	19.4542	19.2822	19.5228	19.6012	19.425	19.1648	19.2233	19.0229	19.1977	19.2697	19.0746	19.6149	19.3682	19.562	19.2949	19.1479	19.3198	19.4084	0.171829
ph_Q9NWQ8:317	Q9NWQ8	0	0	0	1.38522e-239	3	-0.031589	1	0.99575	SREEDPTLTEEEISAMY(0.996)S(0.003)S(0.001)VNKPGQLVNK	317	Y	55824	PAG1	CBP PAG	protein-coding	8q21.13	phosphoprotein membrane anchor with glycosphingolipid microdomains 1 ||| Phosphoprotein associated with glycosphingolipid-enriched microdomains 1	23.1581	24.1786	23.6272	23.5929	23.3167	23.1113	23.5021	23.3314	23.6192	23.0128	23.1235	22.9107	24.1067	23.3698	23.6962	23.9017	23.7782	23.8289	23.6684	23.61	23.214	23.4167	23.316	23.0171	23.7383	23.799	23.8036	23.4975	23.2499	23.7803	-0.247522
ph_Q14247:421	Q14247	0	0	0	6.29311e-36	3	0.96817	1	0.631062	TQTPPVSPAPQPT(0.013)EERLPS(0.096)S(0.257)PVY(0.631)EDAAS(0.002)FK	421	Y	2017	CTTN	EMS1	protein-coding	11q13.3	cortactin ||| Src substrate cortactin	21.0557	21.4	21.4422		21.7883		21.5476		21.7571		21.1272		21.8191			21.7786			21.2279	21.4422	21.7883	21.5476	21.7571	21.1272	21.8191	21.7786	NA	21.4861	21.4773	21.7988	-0.00884086
ph_Q8N3R9:243	Q8N3R9	0	0	0	5.0049e-09	2	0.47746	1	0.999943	VY(1)ESIGQYGGETVK	243	Y	64398	MPP5	PALS1	protein-coding	14q23.3	membrane palmitoylated protein 5 ||| MAGUK p55 subfamily member 5		19.4276	19.554	19.1843	19.7409		19.5379			19.1729	19.8306	19.5466	19.8704		19.6981	19.6565	19.7942		19.4276	19.3692	19.7409	19.5379	19.1729	19.6886	19.8704	19.6773	19.7942	19.5126	19.4665	19.7806	-0.0461337
ph_P18433:798	P18433	0	0	0	1.43682e-120	3	0.54326	1	0.99991	VVQEYIDAFSDY(1)ANFK	798	Y	5786	PTPRA	HEPTP HLPR HPTPA HPTPalpha LRP PTPA PTPRL2 R-PTP-alpha RPTPA	protein-coding	20p13	protein tyrosine phosphatase receptor type A ||| Receptor-type tyrosine-protein phosphatase alpha	23.3793	24.3038	23.6824	24.1333	23.9891	24.3517	24.4777	24.82	23.5433	24.119	24.1297	24.4142	23.8577	24.2529	23.9	24.6931	24.4478	24.6017	23.8415	23.9079	24.1704	24.6489	23.8312	24.2719	24.0553	24.2965	24.5247	23.9733	24.2506	24.2922	0.277373
ph_P07948:398	P07948	0	0	0	2.59936e-176	2	-0.10537	1	0.977696	VIEDNEY(0.022)T(0.978)AREGAK	398	T	3055 4067	HCK LYN	JTK9 p59Hck p61Hck JTK8 p53Lyn p56Lyn	protein-coding	20q11.21!8q12.1	HCK proto-oncogene, Src family tyrosine kinase ||| Tyrosine-protein kinase HCK ||| LYN proto-oncogene, Src family tyrosine kinase ||| Tyrosine-protein kinase Lyn	24.5365	24.2167	24.6526		24.6987		24.7621		24.758	24.5408	25.1164	24.6376	24.9266	24.6509	24.8543	24.5068	25.3973	24.5766	24.3766	24.6526	24.6987	24.7621	24.6494	24.877	24.7887	24.6806	24.987	24.576	24.7628	24.8188	0.186892
ph_P49454:3096	P49454	0	0	0	0.00518394	2	0.81231	1	0.999289	TS(0.001)PY(0.999)ILRR	3096	Y	1063	CENPF	CENF CILD31 PRO1779 STROMS hcp-1	protein-coding	1q41	centromere protein F				19.4072	17.5542						18.0041					20.1776	20.0878		NA	19.4072	17.5542	NA	NA	18.0041	NA	20.1776	20.0878	18.4807	18.0041	20.1327	-0.476615
ph_Q63HR2:483	Q63HR2	0	0	0	1.34971e-189	2	0.38643	1	0.999803	GPLDGSPY(1)AQVQRPPR	483	Y	23371	TNS2	C1-TEN C1TEN TENC1	protein-coding	12q13.13	tensin 2 ||| Tensin-2	23.1112	23.6797	23.3023	23.1436	23.6124	23.7875	23.9292	23.8378	23.845	23.9397	23.9715	23.9805	23.8081	23.7442	23.8449	23.7812	23.7306	23.8553	23.3955	23.2229	23.7	23.8835	23.8923	23.976	23.7761	23.8131	23.7929	23.4395	23.9173	23.794	0.477822
ph_P29317:594	P29317	0	0	0	1.5722e-176	3	0.23216	1;2	0.974621	SEQLKPLKT(0.957)Y(0.043)VDPHT(0.025)Y(0.975)EDPNQAVLK	594	Y	1969	EPHA2	ARCC2 CTPA CTPP1 CTRCT6 ECK	protein-coding	1p36.13	EPH receptor A2 ||| Ephrin type-A receptor 2	26.6346	26.5464	26.6145	25.8395	26.8132	26.3832	26.8916	26.4092	26.7211	26.4961	26.7905	26.4438	27.1715	26.6878	26.789	26.787	26.6062	26.3889	26.5905	26.227	26.5982	26.6504	26.6086	26.6172	26.9296	26.788	26.4976	26.4719	26.6254	26.7384	0.153506
ph_Q96J84:745	Q96J84	0	0	0	2.02803e-32	2	0.21812	1	0.959641	FSYTSQHS(0.04)DY(0.96)GQR	745	Y	55243	KIRREL1	KIRREL NEPH1	protein-coding	1q23.1	kirre like nephrin family adhesion molecule 1 ||| Kin of IRRE-like protein 1	18.581	20.8774	21.1482	18.4679	21.3281	21.2485	18.4065	17.8474	21.1669	21.0203	21.0157			20.8565		20.862	20.7787	20.9828	19.7292	19.8081	21.2883	18.1269	21.0936	21.0157	20.8565	20.862	20.8807	20.2752	20.0787	20.8664	-0.196427
ph_P35568:632	P35568	0	0	0	7.52866e-06	2	0.35725	1	0.994641	KGS(0.005)GDY(0.995)MPMSPK	632	Y	3667	IRS1	HIRS-1	protein-coding	2q36.3	insulin receptor substrate 1	21.8503		21.293	21.5617		21.6418			21.8651		21.7927				21.9429	21.8795	21.8423		21.8503	21.4274	21.6418	NA	21.8651	21.7927	NA	21.9112	21.8423	21.6398	21.8289	21.8767	0.189119
ph_P40763:705	P40763	0	0	0	4.17834e-117	3	-0.46182	1	0.999998	YCRPESQEHPEADPGSAAPY(1)LK	705	Y	6774	STAT3	ADMIO ADMIO1 APRF HIES	protein-coding	17q21.2	signal transducer and activator of transcription 3	26.1346	26.3027	26.4924	25.4603	26.4764	26.3026	26.4733	26.1755	26.6372	26.0356	27.0784	26.7013	26.4482	26.1824	26.8794	26.5385	26.5157	26.3072	26.2186	25.9764	26.3895	26.3244	26.3364	26.8898	26.3153	26.7089	26.4115	26.1948	26.5169	26.4786	0.322022
ph_P54756:833	P54756	0	0	0	5.24995e-56	2	-0.061653	1	0.561203	VLEDDPEAAY(0.561)T(0.137)T(0.302)R	833	Y	2042 2043 2044	EPHA3 EPHA4 EPHA5	EK4 ETK ETK1 HEK HEK4 TYRO4 EK8 HEK8 SEK TYRO1 CEK7 EHK-1 EHK1 EK7 HEK7	protein-coding	3p11.1!2q36.1!4q13.1-q13.2	EPH receptor A3 ||| Ephrin type-A receptor 3 ||| EPH receptor A4 ||| Ephrin type-A receptor 4 ||| EPH receptor A5 ||| Ephrin type-A receptor 5								24.4697		24.4473				24.7664		24.7491			NA	NA	NA	24.4697	24.4473	NA	24.7664	24.7491	NA	NA	24.4585	24.7578	NA
ph_Q09666:161	Q09666	0	0	0	6.09932e-41	2	0.59009	1	0.88138	RVT(0.009)AY(0.109)T(0.881)VDVTGR	161	T	79026	AHNAK	AHNAKRS PM227	protein-coding	11q12.3	AHNAK nucleoprotein ||| Neuroblast differentiation-associated protein AHNAK	22.09		22.5059	22.4054	22.1872	17.0742	22.2556		21.909	21.8369	22.2327	17.4727		22.0221	22.0102	21.9606	22.1921	21.863	22.09	22.4557	19.6307	22.2556	21.873	19.8527	22.0221	21.9854	22.0275	21.3921	21.3271	22.0117	-0.0650071
ph_Q8NC56:122	Q8NC56	0	0	0	9.14331e-84	2	0.53932	1	1	GLAY(1)PARPAQLR	122	Y	221496	LEMD2	CTRCT42 LEM2 NET25 dJ482C21.1	protein-coding	6p21.31	LEM domain nuclear envelope protein 2 ||| LEM domain-containing protein 2	21.9189	22.0979	21.7913	21.4877	21.5526	21.5262	22.3819	22.1744	22.3595	22.3946	22.1519	21.9106	22.1394	21.8895	22.1977	22.2151	21.7709	21.7969	22.0084	21.6395	21.5394	22.2781	22.3771	22.0312	22.0145	22.2064	21.7839	21.7291	22.2288	22.0016	0.499689
ph_P62805:89	P62805	0	0	0	3.53806e-07	2	0.96557	1	0.999997	TVTAMDVVY(1)ALKR	89	Y	121504 8359 8363 8362 8368 8370 554313 8366 8364 8360 8367 8361 8365 8294	H4-16 H4C1 H4C11 H4C12 H4C13 H4C14 H4C15 H4C2 H4C3 H4C4 H4C5 H4C6 H4C8 H4C9	H4/p H4C1 H4C11 H4C12 H4C13 H4C14 H4C15 H4C2 H4C3 H4C4 H4C5 H4C6 H4C8 H4C9 HIST4H4 H4-16 H4FA HIST1H4A H4/e H4F2iv H4FE HIST1H4J dJ160A22.2 H4/d H4F2iii H4FD HIST1H4K dJ160A22.1 H4.k H4/k H4FK HIST1H4L FO108 H4 H4/n H4F2 H4FN HIST2H4 HIST2H4A H4/o HIST2H4B H4/I H4FI HIST1H4B H4/g H4FG HIST1H4C dJ221C16.1 H4/b H4FB HIST1H4D dJ221C16.9 H4/j H4FJ HIST1H4E H4/c H4FC HIST1H4F H4/h H4FH HIST1H4H H4/m H…	protein-coding	12p12.3!6p22.2!6p22.1!1q21.2	H4 histone 16 ||| H4 clustered histone 1 ||| H4 clustered histone 11 ||| H4 clustered histone 12 ||| H4 clustered histone 13 ||| H4 clustered histone 14 ||| H4 clustered histone 15 ||| H4 clustered histone 2 ||| H4 clustered histone 3 ||| H4 clustered histone 4 ||| H4 clustered histone 5 ||| H4 clustered histone 6 ||| H4 clustered histone 8 ||| H4 clustered histone 9 ||| Histone H4	19.6017			19.7298			20.2758						19.728	20.5345	20.2224		19.9528	20.3497	19.6017	19.7298	NA	20.2758	NA	NA	20.1312	20.2224	20.1513	19.6657	20.2758	20.1683	0.610069
ph_Q8IYA6:659	Q8IYA6	0	0	0	0.00144145	2	1.2275	1	1	AEQHNY(1)PGIK	659	Y	150468	CKAP2L	---	protein-coding	2q14.1	cytoskeleton associated protein 2 like ||| Cytoskeleton-associated protein 2-like			19.5498			19.076				20.4058	20.6044		20.1668	19.7946				19.5279	NA	19.5498	19.076	NA	20.4058	20.6044	19.9807	NA	19.5279	19.3129	20.5051	19.7543	1.1922
ph_P07948:397	P07948	0	0	0	1.13319e-130	2	0.068291	1	0.99928	VIEDNEY(0.999)T(0.001)AR	397	Y	3055 4067	HCK LYN	JTK9 p59Hck p61Hck JTK8 p53Lyn p56Lyn	protein-coding	20q11.21!8q12.1	HCK proto-oncogene, Src family tyrosine kinase ||| Tyrosine-protein kinase HCK ||| LYN proto-oncogene, Src family tyrosine kinase ||| Tyrosine-protein kinase Lyn	26.0275	26.0052	25.9062	25.9403	26.5503	26.4602	26.0765	26.037	26.3788	26.2349	26.7231	26.5415	26.2013	26.3135	26.3979	26.3243	26.7819	26.5878	26.0163	25.9232	26.5053	26.0567	26.3068	26.6323	26.2574	26.3611	26.6849	26.1483	26.332	26.4345	0.183676
ph_Q09666:160	Q09666	0	0	0	0.000290747	2	1.5243	1	0.963945	VTAY(0.964)T(0.036)VDVTGR	160	Y	79026	AHNAK	AHNAKRS PM227	protein-coding	11q12.3	AHNAK nucleoprotein ||| Neuroblast differentiation-associated protein AHNAK	19.2018				19.8271	19.6417	19.8109		19.4682		19.7912		19.6076	19.5938	19.881	19.8244	19.8674	19.9884	19.2018	NA	19.7344	19.8109	19.4682	19.7912	19.6007	19.8527	19.9279	19.4681	19.6901	19.7938	0.221937
ph_P46783:12	P46783	0	0	0	1.45264e-05	2	0.39137	1	1	IAIY(1)ELLFK	12	Y	6204	RPS10	DBA9 S10	protein-coding	6p21.31	ribosomal protein S10 ||| 40S ribosomal protein S10	20.9079	21.7435	21.2534	21.8293	21.9549	22.2249	21.5659	21.813	21.5674	22.1059	21.8225	22.217	21.7371	22.2114	21.8854	22.4148	21.474	21.9266	21.3257	21.5414	22.0899	21.6895	21.8366	22.0198	21.9743	22.1501	21.7003	21.6523	21.8486	21.9416	0.196306
ph_Q9Y237:122	Q9Y237	0	0	0	1.34617e-05	2	0.17221	1	1	FGY(1)HIIMVEGR	122	Y	5303	PIN4	EPVH PAR14 PAR17	protein-coding	Xq13.1	peptidylprolyl cis/trans isomerase, NIMA-interacting 4 ||| Peptidyl-prolyl cis-trans isomerase NIMA-interacting 4	18.2012	18.9451	18.6079	18.4825		18.7416		18.7285	19.0836	19.0954	18.7438	18.9368	18.9231	18.9789	19.1255	18.6426	18.3798	18.8258	18.5731	18.5452	18.7416	18.7285	19.0895	18.8403	18.951	18.884	18.6028	18.62	18.8861	18.8126	0.26614
ph_Q13428:381	Q13428	0	0	0	6.80588e-07	2	0.51517	1	0.993094	TSQVGAAS(0.007)APAKES(0.993)PR	381	S	6949	TCOF1	MFD1 TCS TCS1 treacle	protein-coding	5q32-q33.1	treacle ribosome biogenesis factor 1 ||| Treacle protein	19.4663	19.4252	19.3459	18.7147	20.1038				19.925	19.2251		19.2904		20.1352	20.2259			19.2622	19.4457	19.0303	20.1038	NA	19.575	19.2904	20.1352	20.2259	19.2622	19.5266	19.4327	19.8744	-0.0939116
ph_P08670:56	P08670	0	0	0	2.76398e-13	2	-0.50963	1;2	0.807335	SLYAS(0.191)S(0.807)PGGVYAT(0.001)R	56	S	7431	VIM	---	protein-coding	10p13	vimentin	19.69		20.3848	18.8094	19.9419	20.5295	19.962	20.1564	19.8674	19.4815		17.6308	20.3478		20.0455				19.69	19.5971	20.2357	20.0592	19.6745	17.6308	20.3478	20.0455	NA	19.8409	19.1215	20.1967	-0.719468
ph_O60674:570	O60674	0	0	0	3.1224e-52	3	0.68949	1	1	REVGDY(1)GQLHETEVLLK	570	Y	3717	JAK2	JTK10 THCYT3	protein-coding	9p24.1	Janus kinase 2 ||| Tyrosine-protein kinase JAK2	21.1832	21.1539	21.152	21.0838	21.242	20.6941	21.024	21.2139	20.9841	20.82	21.3177	21.2612	21.4608	21.2728	21.2865	21.4588	21.0405	21.1456	21.1685	21.1179	20.9681	21.1189	20.9021	21.2894	21.3668	21.3726	21.0931	21.0848	21.1035	21.2775	0.0186369
ph_Q9NWQ8:229	Q9NWQ8	0	0	0	9.07045e-06	2	1.1541	2	1	AEFAEY(1)AS(1)VDRNKK	229	S	55824	PAG1	CBP PAG	protein-coding	8q21.13	phosphoprotein membrane anchor with glycosphingolipid microdomains 1 ||| Phosphoprotein associated with glycosphingolipid-enriched microdomains 1	19.9252			19.8199	20.0743	19.7454			20.4272	20.2824	20.3183	20.2709			20.4046	20.0049		19.6587	19.9252	19.8199	19.9098	NA	20.3548	20.2946	NA	20.2047	19.6587	19.885	20.3247	19.9317	0.43969
ph_P23469:696	P23469	0	0	0	1.19336e-11	2	-0.74206	1	0.987012	VVQDFIDIFS(0.013)DY(0.987)ANFK	696	Y	5791	PTPRE	HPTPE PTPE R-PTP-EPSILON	protein-coding	10q26.2	protein tyrosine phosphatase receptor type E ||| Receptor-type tyrosine-protein phosphatase epsilon	19.0846		19.914	20.7308	20.6009	20.7013			19.6266	20.2893		20.7185	19.8409	20.4262		20.7021		20.4715	19.0846	20.3224	20.6511	NA	19.958	20.7185	20.1336	20.7021	20.4715	20.0194	20.3383	20.4357	0.318885
ph_Q07912:517	Q07912	0	0	0	1.66619e-190	3	0.095051	1	0.605405	KPT(0.605)Y(0.395)DPVSEDQDPLSSDFKR	517	T	10188	TNK2	ACK ACK-1 ACK1 p21cdc42Hs	protein-coding	3q29	tyrosine kinase non receptor 2 ||| Activated CDC42 kinase 1	23.8215	24.017	23.9229	23.4482	24.2981	23.8843	24.3566	24.0854	24.3061	23.9859	24.4392	24.24	24.2657	23.9685	24.145	24.1859	24.1045	24.0129	23.9192	23.6855	24.0912	24.221	24.146	24.3396	24.1171	24.1655	24.0587	23.8987	24.2356	24.1138	0.336885
ph_O00161:139	O00161	0	0	0	2.32166e-46	3	0.33486	1	0.974454	QPGPVTNGQLQQPTTGAAS(0.025)GGY(0.974)IKR	139	Y	8773	SNAP23	HsT17016 SNAP-23 SNAP23A SNAP23B	protein-coding	15q15.1-q15.2	synaptosome associated protein 23 ||| Synaptosomal-associated protein 23	21.4261		22.288	21.3213	21.6052		21.8542		22.0097	21.9151	22.2122		21.5529		22.0258		21.8297		21.4261	21.8046	21.6052	21.8542	21.9624	22.2122	21.5529	22.0258	21.8297	21.612	22.0096	21.8028	0.397578
ph_Q15464:246	Q15464	0	0	0	1.00993e-62	3	1.1784	1	0.961099	DKVTIADDY(0.961)S(0.039)DPFDAKNDLK	246	Y	6461	SHB	bA3J10.2	protein-coding	9p13.1	SH2 domain containing adaptor protein B ||| SH2 domain-containing adapter protein B	21.9047	21.8552	21.8024	22.1113	22.1473	22.0773	21.7697		21.8396	21.5366	21.5704	21.8399	22.4193	22.3172	22.0712	22.3047	22.0741	21.9861	21.88	21.9568	22.1123	21.7697	21.6881	21.7051	22.3682	22.1879	22.0301	21.983	21.721	22.1954	-0.262059
ph_Q96PD2:565	Q96PD2	0	0	0	1.8264e-42	2	0.15178	1	0.974333	TEGT(0.026)Y(0.974)DLPYWDR	565	Y	131566	DCBLD2	CLCP1 ESDN	protein-coding	3q12.1|3	discoidin, CUB and LCCL domain containing 2 ||| Discoidin, CUB and LCCL domain-containing protein 2	19.7047	20.4075	20.1886	20.4664	20.0829	20.5468	20.0786	20.3365	20.0317	20.0818	19.8506	20.3512	20.2333	20.2507	20.2783	20.5291	20.6367	20.5089	20.0561	20.3275	20.3148	20.2075	20.0568	20.1009	20.242	20.4037	20.5728	20.2328	20.1217	20.4062	-0.111067
ph_Q86SQ4:1172	Q86SQ4	0	0	0	2.79837e-27	2	-0.84764	1	0.707984	SLSSSSIGSNS(0.044)T(0.193)Y(0.708)LT(0.044)S(0.01)K	1172	Y	57211	ADGRG6	APG1 DREG GPR126 LCCS9 PR126 PS1TP2 VIGR	protein-coding	6q24.2	adhesion G-protein-coupled receptor G6 ||| Adhesion G-protein coupled receptor G6	20.9145	20.7123	21.1853	20.4523	21.3131	20.9838	21.1917	20.7538	21.1416	20.7267	20.9827	20.9729	21.1827		20.9057	20.8596	21.2974		20.8134	20.8188	21.1484	20.9728	20.9342	20.9778	21.1827	20.8827	21.2974	20.9269	20.9616	21.1209	0.0347019
ph_P29317:931	P29317	0	0	0	2.28614e-07	3	-0.66764	1	0.531458	MQQY(0.001)T(0.002)EHFMAAGY(0.466)T(0.531)AIEK	931	T	1969	EPHA2	ARCC2 CTPA CTPP1 CTRCT6 ECK	protein-coding	1p36.13	EPH receptor A2 ||| Ephrin type-A receptor 2			19.7233				19.4461	19.5586		19.4717	19.3514	19.745	19.8936	19.9858	20.2726	20.1966	19.8309	19.5131	NA	19.7233	NA	19.5023	19.4717	19.5482	19.9397	20.2346	19.672	19.7233	19.5074	19.9488	-0.215928
ph_Q96J84:724	Q96J84	0	0	0	1.04294e-14	2	-0.98045	1	0.99999	TPYEAY(1)DPIGK	724	Y	55243	KIRREL1	KIRREL NEPH1	protein-coding	1q23.1	kirre like nephrin family adhesion molecule 1 ||| Kin of IRRE-like protein 1			20.531	20.3754		20.8586		20.4893	20.7056	20.7512	20.615		20.6614		20.9396	21.0309		20.8852	NA	20.4532	20.8586	20.4893	20.7284	20.615	20.6614	20.9852	20.8852	20.6559	20.6109	20.8439	-0.0450169
ph_P08670:37	P08670	0	0	0	3.19706e-46	2	-0.1345	1	0.597716	T(0.598)Y(0.402)SLGSALRPSTSR	37	T	7431	VIM	---	protein-coding	10p13	vimentin										21.0725		20.9411	21.5393	21.1147		21.1904	21.5866		NA	NA	NA	NA	21.0725	20.9411	21.327	21.1904	21.5866	NA	21.0068	21.368	NA
ph_P11362:653	P11362	0	0	0	2.85547e-24	2	0.363	1;2	1	DIHHIDY(1)Y(1)KK	653	Y	2260	FGFR1	BFGFR CD331 CEK ECCL FGFBR FGFR-1 FLG FLT-2 FLT2 HBGFR HH2 HRTFDS KAL2 N-SAM OGD bFGF-R-1	protein-coding	8p11.23	fibroblast growth factor receptor 1	22.5226	22.4798	22.5233	22.1001	21.8399	21.7031	22.4333	21.789	22.642	22.6071	22.6305	22.3064	22.7936	22.5669	22.671	22.6516	22.4689	21.5999	22.5012	22.3117	21.7715	22.1112	22.6246	22.4685	22.6803	22.6613	22.0344	22.1948	22.4014	22.4587	0.206601
ph_Q9Y520:17	Q9Y520	0	0	0	0.000417694	2	-0.55437	1	0.994879	Y(0.995)AT(0.005)LSLFNTYK	17	Y	23215	PRRC2C	BAT2-iso BAT2D1 BAT2L2 XTP2	protein-coding	1q24.3	proline rich coiled-coil 2C ||| Protein PRRC2C	17.4137	18.2164	17.8965	18.1044				17.5597				18.0534		17.9747			18.3792		17.8151	18.0004	NA	17.5597	NA	18.0534	17.9747	NA	18.3792	17.9077	17.8065	18.1769	-0.101206
ph_Q9H582:815	Q9H582	0	0	0	0.0321138	2	-1.2535	1	1	VIKES(1)KK	815	S	84146	ZNF644	BM-005 MYP21 NatF ZEP-2	protein-coding	1p22.2	zinc finger protein 644	18.8784	19.0212	18.9924			15.4181				18.2479				19.802	18.9166	18.2797		18.2504	18.9498	18.9924	15.4181	NA	18.2479	NA	19.802	18.5981	18.2504	17.7868	18.2479	18.8835	0.461126
ph_Q9H5V8:806	Q9H5V8	0	0	0	8.70892e-48	3	0.53322	1	0.596926	LAT(0.002)EEPPPRS(0.031)PPES(0.031)ES(0.031)EPY(0.597)T(0.227)FS(0.082)HPNNGDVSSK	806	Y	64866	CDCP1	CD318 SIMA135 TRASK	protein-coding	3p21.31	CUB domain containing protein 1 ||| CUB domain-containing protein 1			22.5048				21.6576		21.418			21.8435		21.9768	22.0576	21.8948	22.0108		NA	22.5048	NA	21.6576	21.418	21.8435	21.9768	21.9762	22.0108	22.5048	21.6397	21.9879	-0.86507
ph_P54756:834	P54756	0	0	0	6.39723e-85	2	0.26325	1	0.783962	VLEDDPEAAY(0.004)T(0.784)T(0.212)R	834	T	2042 2043 2044	EPHA3 EPHA4 EPHA5	EK4 ETK ETK1 HEK HEK4 TYRO4 EK8 HEK8 SEK TYRO1 CEK7 EHK-1 EHK1 EK7 HEK7	protein-coding	3p11.1!2q36.1!4q13.1-q13.2	EPH receptor A3 ||| Ephrin type-A receptor 3 ||| EPH receptor A4 ||| Ephrin type-A receptor 4 ||| EPH receptor A5 ||| Ephrin type-A receptor 5	24.2895	24.4219	24.4048		24.4625				24.5953			24.6713					24.8614	24.6712	24.3557	24.4048	24.4625	NA	24.5953	24.6713	NA	NA	24.7663	24.4077	24.6333	24.7663	0.22563
ph_P37802:192	P37802	0	0	0	1.47583e-47	2	-0.3209	1	0.980278	GASQAGMT(0.02)GY(0.98)GMPR	192	Y	8407 29114	TAGLN2 TAGLN3	HA1756 NP22 NP24 NP25	protein-coding	1q23.2!3q13.2	transgelin 2 ||| Transgelin-2 ||| transgelin 3 ||| Transgelin-3	21.8916	22.2167	22.0029	22.1697	21.975	22.1066	21.7441	21.8538	22.2851	22.3137	22.3153	22.1337	21.8901	21.946	22.4817	22.6583	22.3088	22.3395	22.0542	22.0863	22.0408	21.7989	22.2994	22.2245	21.9181	22.57	22.3242	22.0604	22.1076	22.2707	0.0471822
ph_P30530:481	P30530	0	0	0	7.91894e-15	2	-0.029957	1	1	Y(1)GEVFEPTVER	481	Y	558	AXL	ARK JTK11 Tyro7 UFO	protein-coding	19q13.2	AXL receptor tyrosine kinase ||| Tyrosine-protein kinase receptor UFO	20.7468	21.1598	21.005	21.292	21.1787	21.3931	20.7418	20.8495	20.6461	20.5964	20.4812	20.8277	21.2102	21.3009	21.155	21.3553	21.3508	21.2262	20.9533	21.1485	21.2859	20.7957	20.6212	20.6544	21.2555	21.2552	21.2885	21.1292	20.6905	21.2664	-0.438769
ph_Q8WUF5:134	Q8WUF5	0	0	0	0.000360142	2	1.4573	1	0.538589	TPLY(0.001)LQPDAY(0.461)GS(0.539)LDR	134	S	10848	PPP1R13L	IASPP NKIP1 RAI RAI4	protein-coding	19q13.32	protein phosphatase 1 regulatory subunit 13 like ||| RelA-associated inhibitor	18.0325	18.2981	18.0397			18.0109	18.0531	18.089		17.8895	18.262	18.3856	17.7087	18.1356	18.79				18.1653	18.0397	18.0109	18.071	17.8895	18.3238	17.9221	18.79	NA	18.072	18.0948	18.3561	0.0228221
ph_P11413:503	P11413	0	0	0	0.00124921	2	-0.32247	1	0.984903	VGFQY(0.985)EGT(0.008)Y(0.007)K	503	Y	2539	G6PD	G6PD1	protein-coding	Xq28	glucose-6-phosphate dehydrogenase ||| Glucose-6-phosphate 1-dehydrogenase				18.7979		19.4985		19.5113	19.4386					19.1581		19.8699		19.2165	NA	18.7979	19.4985	19.5113	19.4386	NA	19.1581	19.8699	19.2165	19.1482	19.4749	19.4148	0.326743
ph_Q8TF74:74	Q8TF74	0	0	0	1.54955e-08	2	0.97608	1	0.892395	GS(0.052)S(0.044)GGY(0.892)GS(0.011)GGAALQPK	74	Y	147179	WIPF2	WICH WIRE	protein-coding	17q21.2	WAS/WASL interacting protein family member 2 ||| WAS/WASL-interacting protein family member 2			20.5564		19.9807	20.5846			21.3154	20.9661		20.586		20.984					NA	20.5564	20.2827	NA	21.1408	20.586	20.984	NA	NA	20.4195	20.8634	20.984	0.443864
ph_Q9Y520:1218	Q9Y520	0	0	0	0.000912422	2	-0.97165	1	0.980576	GHT(0.014)RDY(0.981)PQY(0.005)R	1218	Y	23215	PRRC2C	BAT2-iso BAT2D1 BAT2L2 XTP2	protein-coding	1q24.3	proline rich coiled-coil 2C ||| Protein PRRC2C		20.2651	19.4756	19.4813			20.4321		20.6139		20.7224	20.652		20.2708	20.5028		20.4678	19.8003	20.2651	19.4784	NA	20.4321	20.6139	20.6872	20.2708	20.5028	20.134	19.8718	20.5778	20.3026	0.705986
ph_Q96RT1:884	Q96RT1	0	0	0	3.41886e-88	3	-0.035239	1	0.993639	SHSITNMEIGGLKIY(0.994)DILS(0.006)DNGPQQPSTTVK	884	Y	55914	ERBIN	ERBB2IP HEL-S-78 LAP2	protein-coding	5q12.3	erbb2 interacting protein ||| Erbin			19.7273				19.0604	19.3644	18.1559	18.2858	19.0042	19.5946			19.055	19.5549	19.2553	19.5474	NA	19.7273	NA	19.2124	18.2209	19.2994	NA	19.305	19.4014	19.7273	18.9109	19.3532	-0.816453
ph_Q13070;Q4V321;Q4V326:10;10;10	Q4V326;Q13070;Q4V321	0	0	0	1.65063e-143	2	0.38551	1	0.961793	STY(0.038)Y(0.962)WPRPR	10;10;10	Y	729428 729422 100132399 729431 100008586 645073 26748 2579 729442 729396 645051 26749 2576 2543 2577 2578	GAGE12B GAGE12C GAGE12D GAGE12E GAGE12F GAGE12G GAGE12I GAGE7 GAGE12H GAGE12J GAGE13 GAGE2E GAGE4 GAGE1 GAGE5 GAGE6	GAGE-12B AL4 CT4.7 GAGE-7 GAGE-7B GAGE-8 GAGE7 GAGE7B GAGE-12G GAGE11 GAGE-12A GAGE-13 GAGE12A GAGE-2E GAGE8 CT4.4 CT4.1 GAGE-1 GAGE-4 GAGE4 CT4.5 CT4.6	protein-coding	Xp11.23!Xp11.4-p11.2	G antigen 12B ||| G antigen 12C ||| G antigen 12D ||| G antigen 12E ||| G antigen 12B/C/D/E ||| G antigen 12F ||| G antigen 12G ||| G antigen 12I ||| G antigen 7 ||| G antigen 12F ||| G antigen 12H ||| G antigen 12J ||| G antigen 13 ||| G antigen 2E ||| G antigen 4 ||| G antigen 1 ||| G antigen 5 ||| G antigen 6	24.2805		24.4157	24.3263	24.2063				24.3281	24.2559	24.2527		24.4085	24.2892	24.2973	24.6511	24.2923		24.2805	24.371	24.2063	NA	24.292	24.2527	24.3488	24.4742	24.2923	24.2859	24.2723	24.3718	-0.0135974
ph_O43293:305	O43293	0	0	0	0.0032762	2	0.94824	1	0.92592	LKEY(0.926)T(0.074)IK	305	Y	1613	DAPK3	DLK ZIP ZIPK	protein-coding	19p13.3	death associated protein kinase 3 ||| Death-associated protein kinase 3		21.6212	21.4988	21.5345	21.7887	22.109			21.8752		22.3111	22.2692	21.9708	20.4158	22.3836	22.229	22.23	21.987	21.6212	21.5167	21.9488	NA	21.8752	22.2901	21.1933	22.3063	22.1085	21.6956	22.0827	21.8694	0.387113
ph_Q13070;Q4V321;Q4V326:9;9;9	Q4V326;Q13070;Q4V321	0	0	0	2.0852e-143	2	-0.053243	1	0.962047	STY(0.962)Y(0.038)WPRPR	9;9;9	Y	729428 729422 100132399 729431 100008586 645073 26748 2579 729442 729396 645051 26749 2576 2543 2577 2578	GAGE12B GAGE12C GAGE12D GAGE12E GAGE12F GAGE12G GAGE12I GAGE7 GAGE12H GAGE12J GAGE13 GAGE2E GAGE4 GAGE1 GAGE5 GAGE6	GAGE-12B AL4 CT4.7 GAGE-7 GAGE-7B GAGE-8 GAGE7 GAGE7B GAGE-12G GAGE11 GAGE-12A GAGE-13 GAGE12A GAGE-2E GAGE8 CT4.4 CT4.1 GAGE-1 GAGE-4 GAGE4 CT4.5 CT4.6	protein-coding	Xp11.23!Xp11.4-p11.2	G antigen 12B ||| G antigen 12C ||| G antigen 12D ||| G antigen 12E ||| G antigen 12B/C/D/E ||| G antigen 12F ||| G antigen 12G ||| G antigen 12I ||| G antigen 7 ||| G antigen 12F ||| G antigen 12H ||| G antigen 12J ||| G antigen 13 ||| G antigen 2E ||| G antigen 4 ||| G antigen 1 ||| G antigen 5 ||| G antigen 6	24.2805	24.3982	24.4157		24.2063		24.2109			24.2559			24.4085	24.2892		24.6511	24.2923	24.3841	24.3393	24.4157	24.2063	24.2109	24.2559	NA	24.3488	24.6511	24.3382	24.3205	24.2334	24.446	-0.0870793
ph_Q6PKG0:361	Q6PKG0	0	0	0	0.000747117	2	0.87584	1	0.973183	THFDY(0.973)QFGY(0.026)R	361	Y	23367	LARP1	LARP	protein-coding	5q33.2	La ribonucleoprotein 1, translational regulator ||| La-related protein 1	18.8798		19.0236											19.0891	19.5512				18.8798	19.0236	NA	NA	NA	NA	19.0891	19.5512	NA	18.9517	NA	19.3202	NA
ph_Q9NRA8:580	Q9NRA8	0	0	0	0.00132996	2	1.0165	1	0.961255	AAS(0.039)ADY(0.961)LRPR	580	Y	56478	EIF4ENIF1	4E-T Clast4	protein-coding	22q12.2	eukaryotic translation initiation factor 4E nuclear import factor 1 ||| Eukaryotic translation initiation factor 4E transporter	19.7047	19.6634		19.9122		19.6088		19.7642					19.8726				20.0889		19.684	19.9122	19.6088	19.7642	NA	NA	19.8726	NA	20.0889	19.735	19.7642	19.9807	0.0291417
ph_Q15417:261	Q15417	0	0	0	0.000190495	2	-0.12036	1	0.999588	GMSVY(1)GLGR	261	Y	1266	CNN3	---	protein-coding	1p21.3	calponin 3 ||| Calponin-3	20.8903	21.2903	21.0536	21.0563	20.9564	21.217	20.9716	21.0112	21.2347	21.4288	21.1876	21.5999	20.6776			21.5826	21.3742		21.0903	21.055	21.0867	20.9914	21.3317	21.3937	20.6776	21.5826	21.3742	21.0773	21.239	21.2115	0.161623
ph_P18206:820	P18206	0	0	0	0.00121933	2	-0.37147	1	0.534733	S(0.006)FLDS(0.535)GY(0.459)RILGAVAK	820	S	7414	VCL	CMD1W CMH15 HEL114 MV MVCL	protein-coding	10q22.2	vinculin			18.9075			18.8642	19.8481		18.4697	18.895		19.2601	19.2968	19.7056					NA	18.9075	18.8642	19.8481	18.6824	19.2601	19.5012	NA	NA	18.8858	19.2635	19.5012	0.377659
ph_Q9Y463:271	Q9Y463	0	0	0	2.28553e-107	2	0.43432	1	0.946769	IY(0.947)QY(0.053)IQSR	271	Y	1859 9149	DYRK1A DYRK1B	DYRK DYRK1 HP86 MNB MNBH MRD7 AOMS3 MIRK	protein-coding	21q22.13!19q13.2	dual specificity tyrosine phosphorylation regulated kinase 1A ||| Dual specificity tyrosine-phosphorylation-regulated kinase 1A ||| dual specificity tyrosine phosphorylation regulated kinase 1B ||| Dual specificity tyrosine-phosphorylation-regulated kinase 1B		23.792				23.4223								23.7375		24.1473			23.792	NA	23.4223	NA	NA	NA	23.7375	24.1473	NA	23.6072	NA	23.9424	NA
ph_P07900:492	P07900	0	0	0	0.000701495	2	1.9824	1	0.873772	HIY(0.874)Y(0.12)IT(0.006)GETK	492	Y	3320 730211	HSP90AA1 HSP90AA5P	EL52 HEL-S-65p HSP86 HSP89A HSP90A HSP90N HSPC1 HSPCA HSPCAL1 HSPCAL4 HSPN Hsp103 Hsp89 Hsp90 LAP-2 LAP2 HSP90Ae	protein-coding|pseudo	14q32.31!3q27.1	heat shock protein 90 alpha family class A member 1 ||| Heat shock protein HSP 90-alpha ||| heat shock protein 90 alpha family class A member 5, pseudogene ||| Putative heat shock protein HSP 90-alpha A5				18.7605				16.9893	19.2668	19.4908		19.2122	18.7633	19.1911	19.4237	18.9657			NA	18.7605	NA	16.9893	19.3788	19.2122	18.9772	19.1947	NA	18.7605	18.5268	19.0859	-0.233772
ph_Q9HAU0:855	Q9HAU0	0	0	0	1.85061e-26	3	0.56423	2	0.80781	AKS(0.808)PT(0.191)PES(0.001)STIAS(0.044)Y(0.895)VT(0.061)LRK	855	S	54477	PLEKHA5	PEPP-2 PEPP2	protein-coding	12p12.3	pleckstrin homology domain containing A5 ||| Pleckstrin homology domain-containing family A member 5			21.3761	21.3603				20.311				19.4469	20.1192		20.2918	20.2932		20.553	NA	21.3682	NA	20.311	NA	19.4469	20.1192	20.2925	20.553	21.3682	19.879	20.3216	-1.48921
ph_Q13546:387	Q13546	0	0	0	3.36445e-09	2	-0.08456	1	0.92991	LQDEANY(0.01)HLY(0.93)GS(0.06)R	387	Y	8737	RIPK1	IMD57 RIP RIP-1 RIP1	protein-coding	6p25.2	receptor interacting serine/threonine kinase 1 ||| Receptor-interacting serine/threonine-protein kinase 1	21.3596	21.2066	21.4286	20.8052	20.7644	20.7452	20.652		21.1249	20.7098	20.8493	20.4276	21.1806			21.0608	21.1231		21.2831	21.1169	20.7548	20.652	20.9174	20.6385	21.1806	21.0608	21.1231	21.0516	20.7359	21.1215	-0.315649
ph_P00519;P42684:393;439	P00519;P42684	0	0	0	1.5138e-27	3	0.31296	1	0.971662	LMTGDTY(0.972)T(0.028)AHAGAK	393;439	Y	25 27	ABL1 ABL2	ABL BCR-ABL CHDSKM JTK7 bcr/abl c-ABL c-ABL1 p150 v-abl ABLL ARG	protein-coding	9q34.12!1q25.2	ABL proto-oncogene 1, non-receptor tyrosine kinase ||| Tyrosine-protein kinase ABL1 ||| ABL proto-oncogene 2, non-receptor tyrosine kinase ||| Tyrosine-protein kinase ABL2	22.3237	22.6484	22.2451	22.2221	22.4829	22.5612	22.0516		22.4746	22.5204	22.2452	22.3612	22.5184	22.7465	22.3708	22.5745	22.3406	22.4574	22.4861	22.2336	22.5221	22.0516	22.4975	22.3032	22.6325	22.4727	22.399	22.4139	22.2841	22.5014	-0.129817
ph_P09651:366	P09651	0	0	0	6.93119e-21	2	0.21475	1	0.616998	NQGGYGGSS(0.002)S(0.002)S(0.009)S(0.037)S(0.167)Y(0.617)GS(0.167)GR	366	Y	3178	HNRNPA1	ALS19 ALS20 HNRPA1 HNRPA1L3 IBMPFD3 UP-1 hnRNP-A1	protein-coding	12q13.13	heterogeneous nuclear ribonucleoprotein A1					20.8875		21.1564		20.9361	20.4415	21.3366		21.2422		21.4186	21.2295			NA	NA	20.8875	21.1564	20.6888	21.3366	21.2422	21.324	NA	20.8875	21.0606	21.2831	0.1731
ph_Q6ZSR9:28	Q6ZSR9	0	0	0	1.11606e-05	2	1.2267	1	0.959705	TQNNLES(0.04)DY(0.96)LAR	28	Y	22848	AAK1	---	protein-coding	2p13.3	AP2 associated kinase 1 ||| Uncharacterized protein FLJ45252	19.1372	19.3862			19.4608	19.6909		19.5705	19.679								19.6402		19.2617	NA	19.5759	19.5705	19.679	NA	NA	NA	19.6402	19.4188	19.6248	19.6402	0.205991
ph_P50402:161	P50402	0	0	0	4.92789e-12	3	-1.4345	1	0.996237	DS(0.001)AY(0.996)QS(0.003)ITHYRPVSASR	161	Y	2010	EMD	EDMD LEMD5 STA	protein-coding	Xq28	emerin	21.1436	21.4273	21.1575	21.3331	18.273	21.4526			20.6968	20.9769		21.2805	20.938	21.144	21.1414	20.796	20.9267		21.2855	21.2453	19.8628	NA	20.8368	21.2805	21.041	20.9687	20.9267	20.7978	21.0587	20.9788	0.260831
ph_Q96J84:572	Q96J84	0	0	0	9.61659e-112	2	-0.099391	1	0.999574	AIY(1)SSFKDDVDLK	572	Y	55243	KIRREL1	KIRREL NEPH1	protein-coding	1q23.1	kirre like nephrin family adhesion molecule 1 ||| Kin of IRRE-like protein 1	21.1857	21.5708	21.3777	21.3583	21.7864	21.5602	21.3349	21.2227	21.8491	21.4312	21.1148	21.1677	21.8338	21.5691	21.4681	21.6823	21.459	21.3217	21.3783	21.368	21.6733	21.2788	21.6401	21.1412	21.7015	21.5752	21.3904	21.4732	21.3534	21.5557	-0.119798
ph_P00533:869	P00533	0	0	0	9.94803e-08	2	-0.43955	1	1	EY(1)HAEGGKVPIK	869	Y	1956	EGFR	ERBB ERBB1 HER1 NISBD2 PIG61 mENA	protein-coding	7p11.2	epidermal growth factor receptor	19.8425		20.3518	20.0309	20.2875	19.9766		19.7919	20.6133	20.1154	21.073			19.7512	20.8296		20.4848	19.3553	19.8425	20.1913	20.1321	19.7919	20.3644	21.073	19.7512	20.8296	19.9201	20.0553	20.4098	20.1669	0.35447
ph_P49023:85	P49023	0	0	0	8.17773e-19	2	0.5997	2	0.844799	FIHQQPQS(0.036)S(0.097)S(0.845)PVY(0.743)GS(0.209)S(0.07)AK	85	S	5829	PXN	---	protein-coding	12q24.23	paxillin			21.9394		21.9347		21.8301		21.6876		22.1429			21.8909		21.7734	22.4491		NA	21.9394	21.9347	21.8301	21.6876	22.1429	21.8909	21.7734	22.4491	21.9371	21.8868	22.0378	-0.0502131
ph_Q05655:304	Q05655	0	0	0	3.9721e-12	3	0.52288	2	0.656511	RS(0.207)DS(0.657)AS(0.069)S(0.069)EPVGIY(0.999)QGFEKK	304	S	5580	PRKCD	ALPS3 CVID9 MAY1 PKCD nPKC-delta	protein-coding	3p21.1	protein kinase C delta ||| Protein kinase C delta type	20.3194		19.9894						20.7677		20.0031							20.0742	20.3194	19.9894	NA	NA	20.7677	20.0031	NA	NA	20.0742	20.1544	20.3854	20.0742	0.230972
ph_P29597:433	P29597	0	0	0	4.80914e-34	3	0.086268	1	0.934362	LT(0.002)ADS(0.032)S(0.032)HY(0.934)LCHEVAPPR	433	Y	7297	TYK2	IMD35 JTK1	protein-coding	19p13.2	tyrosine kinase 2 ||| Non-receptor tyrosine-protein kinase TYK2	20.9363		21.2739	20.9568	20.4926						20.4929		20.938		21.0126	20.8381	21.1115		20.9363	21.1153	20.4926	NA	NA	20.4929	20.938	20.9254	21.1115	20.8481	20.4929	20.9916	-0.355204
ph_P07355:24	P07355	0	0	0	0	2	0.41846	1	0.999971	LSLEGDHSTPPSAY(1)GSVK	24	Y	302 304	ANXA2 ANXA2P2	ANX2 ANX2L4 CAL1H HEL-S-270 LIP2 LPC2 LPC2D P36 PAP-IV ANX2L2 ANX2P2 LPC2B	protein-coding|pseudo	15q22.2!9p13.3	annexin A2 ||| annexin A2 pseudogene 2 ||| Putative annexin A2-like protein	26.1263	26.4041	26.313	26.3383	26.7382	26.6096	25.9659	25.9751	26.0172	25.8686	26.2693	26.227	26.1782	26.4979	26.4534	26.3614	26.6392	26.6024	26.2652	26.3256	26.6739	25.9705	25.9429	26.2482	26.338	26.4074	26.6208	26.4216	26.0539	26.4554	-0.36771
ph_Q9NX40:199	Q9NX40	0	0	0	0.00346965	2	2.2553	1	0.9743	NIT(0.026)Y(0.974)EELR	199	Y	54940	OCIAD1	ASRIJ OCIA TPA018	protein-coding	4p11	OCIA domain containing 1 ||| OCIA domain-containing protein 1	19.7542	19.9825	19.4654	19.6353	19.5619	20.313	19.7931					19.9888				20.4254			19.8683	19.5504	19.9375	19.7931	NA	19.9888	NA	20.4254	NA	19.7854	19.8909	20.4254	0.105564
ph_P13929:44	P13929	0	0	0	5.20528e-20	2	-0.0072512	1	0.981997	AAVPSGAS(0.003)T(0.014)GIY(0.982)EALELR	44	Y	2027	ENO3	GSD13 MSE	protein-coding	17p13.2	enolase 3 ||| Beta-enolase			19.4788			20.1644				20.0087	19.8805	20.0445			19.3742				NA	19.4788	20.1644	NA	20.0087	19.9625	NA	19.3742	NA	19.8216	19.9856	19.3742	0.164019
ph_O60716:193	O60716	0	0	0	1.79284e-29	3	0.27849	1	0.999997	KNGNGGPGPY(1)VGQAGTATLPR	193	Y	1500 100528016	CTNND1 TMX2-CTNND1	BCDS2 CAS CTNND P120CAS P120CTN p120 p120(CAS) p120(CTN) CTNND1 p120(cas) p120(ctn)	protein-coding|ncRNA	11q12.1	catenin delta 1 ||| TMX2-CTNND1 readthrough (NMD candidate) ||| Catenin delta-1	20.1569		20.7836	20.3982	20.42		20.7048		20.5088					20.6965	20.4021	20.5295	20.3066	19.9431	20.1569	20.5909	20.42	20.7048	20.5088	NA	20.6965	20.4658	20.1248	20.3893	20.6068	20.429	0.217519
ph_P12814:193	P12814	0	0	0	0.000311369	2	1.4209	1	1	HRPELIDY(1)GK	193	Y	87	ACTN1	BDPLT15	protein-coding	14q24.1|14q22-q24	actinin alpha 1 ||| Alpha-actinin-1	19.504		19.1272		19.577	19.5179	19.6198	19.5084	19.5686	19.8363	19.555	19.8185	19.1586		19.2771	19.5918	19.9216	19.4737	19.504	19.1272	19.5475	19.5641	19.7024	19.6867	19.1586	19.4344	19.6976	19.3929	19.6511	19.4302	0.258161
ph_P40763:708	P40763	0	0	0	5.01235e-11	2	-0.86419	1	0.630012	YCRPESQEHPEADPGS(0.002)AAPY(0.367)LKT(0.63)K	708	T	6774	STAT3	ADMIO ADMIO1 APRF HIES	protein-coding	17q21.2	signal transducer and activator of transcription 3		19.8498	20.1759	19.3088	19.8059	19.704	19.889	19.6319	19.3705	18.9176	19.8338	19.6535	20.0632	19.3135	20.1055	19.7711	19.9589	19.7037	19.8498	19.7423	19.755	19.7604	19.144	19.7436	19.6884	19.9383	19.8313	19.7824	19.5494	19.8193	-0.232993
ph_P49914:83	P49914	0	0	0	2.6483e-05	3	0.12688	1	0.998015	Y(0.998)RFQS(0.002)NHMDMVR	83	Y	10588	MTHFS	HsT19268 NEDMEHM	protein-coding	15q25.1	methenyltetrahydrofolate synthetase ||| 5-formyltetrahydrofolate cyclo-ligase	20.8732	21.3235	20.4718	20.7566	20.0899	20.8042	20.7851		20.5661	20.8976	20.7708				20.9396		20.6058		21.0984	20.6142	20.4471	20.7851	20.7319	20.7708	NA	20.9396	20.6058	20.7199	20.7626	20.7727	0.0426993
ph_P16591:402	P16591	0	0	0	1.4218e-36	3	-0.25695	1	1	VQENDGKEPPPVVNY(1)EEDAR	402	Y	2241	FER	PPP1R74 TYK3 p94-Fer	protein-coding	5q21.3	FER tyrosine kinase ||| Tyrosine-protein kinase Fer	22.3145	22.2066	22.7361	22.2103	22.24	22.1283	22.2103	21.8708	22.4759	22.3357	22.4166	21.9558	22.5605	22.4081	22.6479	22.3064	22.1493	22.0284	22.2606	22.4732	22.1841	22.0406	22.4058	22.1862	22.4843	22.4771	22.0889	22.306	22.2109	22.3501	-0.095111
ph_P08069:1161	P08069	0	0	0	7.28155e-08	2	0.4895	2	0.999988	DIY(1)ET(0.03)DY(0.848)Y(0.121)RKGGK	1161	Y	3480 3643	IGF1R INSR	CD221 IGFIR IGFR JTK13 CD220 HHF5	protein-coding	15q26.3!19p13.2	insulin like growth factor 1 receptor ||| Insulin-like growth factor 1 receptor ||| insulin receptor			19.9423	19.5976		19.4734					19.6363			19.8138		19.5768	19.712		NA	19.7699	19.4734	NA	NA	19.6363	19.8138	19.5768	19.712	19.6217	19.6363	19.7009	0.0146189
ph_O94910:1440	O94910	0	0	0	0.000681948	2	-0.32105	1	0.856716	NPLQGY(0.857)Y(0.143)QVR	1440	Y	22859	ADGRL1	CIRL1 CL1 LEC2 LPHN1	protein-coding	19p13.12	adhesion G-protein-coupled receptor L1			19.7291			19.4573			19.5991		19.6905				19.8919				NA	19.7291	19.4573	NA	19.5991	19.6905	NA	19.8919	NA	19.5932	19.6448	19.8919	0.0515998
ph_Q16539:182	Q16539	0	0	0	0	2	-0.019805	1;2	0.999998	HTDDEMT(1)GY(1)VATR	182	Y	1432	MAPK14	CSBP CSBP1 CSBP2 CSPB1 EXIP Mxi2 PRKM14 PRKM15 RK SAPK2A p38 p38ALPHA	protein-coding	6p21.31	mitogen-activated protein kinase 14	26.3963	26.2298	26.3324	25.8382	26.0675	25.8648	26.2867	26.1686	26.2835	26.1178	26.2667	25.9018	26.2589	26.1269	26.3635	26.0085	26.255	25.868	26.3131	26.0853	25.9661	26.2276	26.2007	26.0843	26.1929	26.186	26.0615	26.1215	26.1709	26.1468	0.0493419
ph_P61019:3	P61019	0	0	0	0.00346918	2	0.13273	1	0.998441	AY(0.998)AY(0.002)LFK	3	Y	5862	RAB2A	LHX RAB2	protein-coding	8q12.1-q12.2	RAB2A, member RAS oncogene family ||| Ras-related protein Rab-2A	18.5154		18.6012		19.0637	19.5547	18.9002	19.3716	18.6163						16.3596				18.5154	18.6012	19.3092	19.1359	18.6163	NA	NA	16.3596	NA	18.8086	18.8761	16.3596	0.067487
ph_Q68CJ9:267	Q68CJ9	0	0	0	0.00124594	2	-1.113	1	0.970911	KEY(0.971)IDGLET(0.029)R	267	Y	84699	CREB3L3	CREB-H CREBH HYST1481	protein-coding	19p13.3	cAMP responsive element binding protein 3 like 3 ||| Cyclic AMP-responsive element-binding protein 3-like protein 3				20.0431		22.196		21.1966	21.0908	20.998		21.4908						20.2861	NA	20.0431	22.196	21.1966	21.0444	21.4908	NA	NA	20.2861	21.1196	21.2439	20.2861	0.124357
ph_P22314:55	P22314	0	0	0	5.59381e-05	2	0.37376	1	0.773525	NGSEADIDEGLY(0.774)S(0.226)R	55	Y	7317	UBA1	A1S9 A1S9T A1ST AMCX1 CFAP124 GXP1 POC20 SMAX2 UBA1A UBE1 UBE1X	protein-coding	Xp11.3	ubiquitin like modifier activating enzyme 1 ||| Ubiquitin-like modifier-activating enzyme 1									18.4296	18.5595	18.3983	18.2005	18.6985	18.2456		18.2562	18.7618	18.3185	NA	NA	NA	NA	18.4945	18.2994	18.472	18.2562	18.5401	NA	18.397	18.4228	NA
ph_Q9C0B5:359	Q9C0B5	0	0	0	1.47295e-36	3	-0.09819	1	0.50306	Y(0.013)RPGY(0.338)S(0.503)S(0.136)S(0.007)S(0.002)TSAAMPHSSSAK	359	S	25921	ZDHHC5	DHHC5 ZNF375	protein-coding	11q12.1	zinc finger DHHC-type palmitoyltransferase 5 ||| Palmitoyltransferase ZDHHC5			21.3832					19.9204				20.3443		20.2255		20.0963	20.3746	19.9813	NA	21.3832	NA	19.9204	NA	20.3443	20.2255	20.0963	20.1779	21.3832	20.1323	20.1666	-1.25085
ph_P18669:92	P18669	0	0	0	3.10809e-69	2	0.28759	1	0.999999	HY(1)GGLTGLNKAETAAK	92	Y	5223 5224 441531	PGAM1 PGAM2 PGAM4	HEL-S-35 PGAM-B PGAMA GSD10 PGAM-M PGAMM PGAM1 PGAM3 dJ1000K24.1	protein-coding	10q24.1!7p13!Xq21.1	phosphoglycerate mutase 1 ||| phosphoglycerate mutase 2 ||| phosphoglycerate mutase family member 4 ||| Probable phosphoglycerate mutase 4	22.963	23.2536	22.9176	22.8579	22.5206	22.4318	22.9391	22.9149	22.8824	22.8907	22.6619	22.7617	22.7415	22.9102	22.9256	22.9586	22.8357	22.6544	23.1083	22.8878	22.4762	22.927	22.8865	22.7118	22.8259	22.9421	22.7451	22.8241	22.8418	22.8377	0.0177187
ph_Q587J7:328	Q587J7	0	0	0	5.94544e-05	2	0.0019672	1	0.999946	VESSVY(1)WPAKR	328	Y	91646	TDRD12	ECAT8	protein-coding	19q13.11	tudor domain containing 12 ||| Putative ATP-dependent RNA helicase TDRD12	19.7196		20.3119	20.114	19.6227				20.0782		19.9535			19.7608		19.9866			19.7196	20.2129	19.6227	NA	20.0782	19.9535	19.7608	19.9866	NA	19.8517	20.0158	19.8737	0.164079
ph_P19174:771	P19174	0	0	0	2.77246e-13	2	-0.039968	1	0.99525	IGT(0.001)AEPDY(0.995)GALY(0.004)EGR	771	Y	5335	PLCG1	NCKAP3 PLC-II PLC1 PLC148 PLCgamma1	protein-coding	20q12	phospholipase C gamma 1 ||| 1-phosphatidylinositol 4,5-bisphosphate phosphodiesterase gamma-1	19.9579	20.095	20.3291	20.4255		20.007			20.1495	19.8759					20.2887	20.4655	19.9398		20.0265	20.3773	20.007	NA	20.0127	NA	NA	20.3771	19.9398	20.1369	20.0127	20.1584	-0.124255
ph_Q9BZG1:247	Q9BZG1	0	0	0	0.000137372	2	1.2697	1	0.858251	INS(0.004)DDS(0.031)NLY(0.858)LT(0.095)AS(0.011)K	247	Y	83871	RAB34	NARR RAB39 RAH	protein-coding	17q11.2	RAB34, member RAS oncogene family ||| Ras-related protein Rab-34			20.1801							18.6232		19.0182	18.8098	19.0084		18.6736	19.0445	18.8131	NA	20.1801	NA	NA	18.6232	19.0182	18.9091	18.6736	18.9288	20.1801	18.8207	18.8372	-1.3594
ph_O75391:189	O75391	0	0	0	7.45326e-14	3	-0.78105	1	0.942913	DAAHMLQANKT(0.057)Y(0.943)GCVPVANKR	189	Y	9552	SPAG7	ACRP FSA-1	protein-coding	17p13.2	sperm associated antigen 7 ||| Sperm-associated antigen 7		19.6502	20.0885	18.751	19.2658	19.458			19.6156		19.6305		19.6327		19.4992		19.2952		19.6502	19.4197	19.3619	NA	19.6156	19.6305	19.6327	19.4992	19.2952	19.4773	19.6231	19.4757	0.14578
ph_REV__O94966:139	REV__O94966	0	3	0	0.0282002	2	-0.39832	1	0.995793	LWGVDRS(0.996)QS(0.004)R	139	S	---	---	---	---	---	---					22.3094			21.9988											NA	NA	22.3094	21.9988	NA	NA	NA	NA	NA	22.3094	21.9988	NA	-0.310587
ph_REV__Q9UHG0:229	REV__Q9UHG0	0	3	0	0.00220397	2	-1.0599	1	0.499985	S(0.5)S(0.5)GVIPPLSSK	229	S	---	---	---	---	---	---	20.6431									24.2913									20.6431	NA	NA	NA	24.2913	NA	NA	NA	NA	20.6431	24.2913	NA	3.64815
ph_REV__Q9UHG0:230	REV__Q9UHG0	0	3	0	0.00220397	2	-1.0599	1	0.499985	S(0.5)S(0.5)GVIPPLSSK	230	S	---	---	---	---	---	---	20.6431									24.2913									20.6431	NA	NA	NA	24.2913	NA	NA	NA	NA	20.6431	24.2913	NA	3.64815
ph_REV__Q4VNC0:398	REV__Q4VNC0	0	3	0	0.0486772	2	2.1766	1	1	MAFVT(1)GNVLK	398	T	---	---	---	---	---	---											22.261	22.0133							NA	NA	NA	NA	NA	22.1372	NA	NA	NA	NA	22.1372	NA	NA
ph_REV__Q92575:137	REV__Q92575	0	3	0	0.0486329	2	0.34752	1	0.997136	LY(0.003)DKET(0.997)FR	137	T	---	---	---	---	---	---						24.3748						24.6954	24.7416						NA	NA	24.3748	NA	NA	24.6954	24.7416	NA	NA	24.3748	24.6954	24.7416	0.320658
ph_REV__O60293:474	REV__O60293	0	3	0	0.00021698	2	2.1984	1	0.99874	T(0.001)LY(0.999)EAVIGDNAK	474	Y	---	---	---	---	---	---					21.8051								21.2899			21.3134	16.7821		NA	NA	21.8051	NA	NA	NA	21.2899	21.3134	16.7821	21.8051	NA	19.7951	NA
ph_REV__Q86VI3:464	REV__Q86VI3	0	3	0	0.000309396	2	-0.88737	1	0.999916	VY(1)VESDTADPK	464	Y	---	---	---	---	---	---				22.27															NA	22.27	NA	NA	NA	NA	NA	NA	NA	22.27	NA	NA	NA
ph_REV__Q8NG85:4	REV__Q8NG85	0	3	0	0.0486772	2	0.15393	1	0.99991	MGS(1)CRIQSR	4	S	---	---	---	---	---	---	23.1507	23.5304	22.9062	22.8133	22.9591	23.1634	23.4976	23.1633	22.9831	23.189	23.1543	23.2972	23.4964	23.3513	23.3676	23.3235	23.4757	23.5419	23.3406	22.8597	23.0612	23.3304	23.0861	23.2257	23.4239	23.3455	23.5088	23.0872	23.2141	23.4261	0.126902
ph_REV__Q8WZ42:17493	REV__Q8WZ42	0	3	0	0.0486772	2	1.9339	---	1	MWS(1)RLCSR	17493	S	---	---	---	---	---	---	18.6313			16.9467			18.0201	18.9617		16.5996					17.4348		18.3944	18.5079	18.6313	16.9467	NA	18.4909	16.5996	NA	NA	17.4348	18.4511	17.789	17.5453	17.943	-0.243751
[truncated: 18 more columns]

## Sheet: any_diff_expr_comparison
Supplemental Table S3. B) Differentially expressed subset of rows.																		Injection	1	2	1	2	1	2	1	2	1	2	1	2	1	2	1	2	1	2	Average injection replicates									Avgerage biological replicates			Log2 ratios
																		Biorep	1	1	2	2	3	3	1	1	2	2	3	3	1	1	2	2	3	3	1	2	3	1	2	3	1	2	3
																		Condition	DMSO	DMSO	DMSO	DMSO	DMSO	DMSO	0.5 hr	0.5 hr	0.5 hr	0.5 hr	0.5 hr	0.5 hr	4 hr	4 hr	4 hr	4 hr	4 hr	4 hr	DMSO	DMSO	DMSO	0.5 hr	0.5 hr	0.5 hr	4 hr	4 hr	4 hr
ModificationID	Leading Proteins	Has_Contaminant_Flag	All_Reverse_Flag	Cow_Contaminant_Flag	PEP	Charge	Mass Error [ppm]	Number of Phospho (STY)	Localization Prob	Phospho (STY) Probabilities	Positions	Amino Acid	GeneID	Symbol	Alias	Type	Location	Description	DMSO1-1	DMSO1-2	DMSO2-1	DMSO2-2	DMSO3-1	DMSO3-2	Rxdx10630MIN1-1	Rxdx10630MIN1-2	Rxdx10630MIN2-1	Rxdx10630MIN2-2	Rxdx10630MIN3-1	Rxdx10630MIN3-2	Rxdx1064hr1-1	Rxdx1064hr1-2	Rxdx1064hr2-1	Rxdx1064hr2-2	Rxdx1064hr3-1	Rxdx1064hr3-2	DMSO1	DMSO2	DMSO3	RXDX10630MIN1	RXDX10630MIN2	RXDX10630MIN3	RXDX1064hr1	RXDX1064hr2	RXDX1064hr3	Avg DMSO	Avg 0.5 hr	Avg 4 hr	0.5 vs. DMSO
ph_Q09666:5836	Q09666	0	0	0	9.39554e-150	3	-0.035076	1;2	0.99442	S(0.002)KGHY(0.994)EVT(0.073)GS(0.93)DDETGKLQGSGVSLASK	5836	Y	79026	AHNAK	AHNAKRS PM227	protein-coding	11q12.3	AHNAK nucleoprotein ||| Neuroblast differentiation-associated protein AHNAK	24.1153	23.8799	24.4769	23.4667	24.0566	23.69	18.9781	20.6711	19.4929	18.0812	20.5494	19.3293	20.4745	20.4845	20.4837		20.282	20.3392	23.9976	23.9718	23.8733	19.8246	18.7871	19.9394	20.4795	20.4837	20.3106	23.9476	19.517	20.4246	-4.43058
ph_Q6IAA8:40	Q6IAA8	0	0	0	8.83666e-14	3	-0.020063	1	0.990523	ALNGAEPNY(0.991)HS(0.009)LPS(0.001)AR	40	Y	55004	LAMTOR1	C11orf59 PDRO Ragulator1 p18 p27RF-Rho	protein-coding	11q13.4	late endosomal/lysosomal adaptor, MAPK and MTOR activator 1 ||| Ragulator complex protein LAMTOR1	20.9154		21.2799		21.1578			19.6484				17.6108	19.5882		19.1101	19.4123	19.5959	19.034	20.9154	21.2799	21.1578	19.6484	NA	17.6108	19.5882	19.2612	19.3149	21.1177	18.6296	19.3881	-2.48806
ph_Q99569:1094	Q99569	0	0	0	1.30966e-29	3	0.26778	1	0.971457	GLYPGSSKPS(0.003)PIY(0.971)IS(0.015)S(0.004)Y(0.005)SSPAR	1094	Y	8502	PKP4	p0071	protein-coding	2q24.1	plakophilin 4 ||| Plakophilin-4	20.7383		20.7505		20.7911		19.7507		16.0587					19.9683		20.0106	19.3699	19.5626	20.7383	20.7505	20.7911	19.7507	16.0587	NA	19.9683	20.0106	19.4663	20.76	17.9047	19.8151	-2.85531
ph_Q9UQC2:293	Q9UQC2	0	0	0	3.08641e-34	3	-0.01787	1	0.937153	GSLTGS(0.003)ET(0.003)DNEDVY(0.937)T(0.057)FKTPSNTLCR	293	Y	9846	GAB2	---	protein-coding	11q14.1	GRB2 associated binding protein 2 ||| GRB2-associated-binding protein 2	20.8302	21.0434	21.1128			20.3688	19.5389	19.144	19.6516		19.3294			20.2905		20.3466			20.9368	21.1128	20.3688	19.3414	19.6516	19.3294	20.2905	20.3466	NA	20.8061	19.4408	20.3186	-1.36533
ph_Q9Y5K6:361	Q9Y5K6	0	0	0	3.61174e-10	2	0.615	1	0.999929	Y(1)FSLKPEEKDEK	361	Y	23607	CD2AP	CMS	protein-coding	6p12.3	CD2 associated protein ||| CD2-associated protein	21.0261	21.76	21.3163	20.8022	20.8456	20.793	20.4174	20.1317	19.8851						21.4575			20.3467	21.3931	21.0593	20.8193	20.2746	19.8851	NA	NA	21.4575	20.3467	21.0905	20.0798	20.9021	-1.01072
ph_P08069:1165	P08069	0	0	0	7.28155e-08	2	0.4895	1;2	0.848482	DIY(1)ET(0.03)DY(0.848)Y(0.121)RKGGK	1165	Y	3480 3643	IGF1R INSR	CD221 IGFIR IGFR JTK13 CD220 HHF5	protein-coding	15q26.3!19p13.2	insulin like growth factor 1 receptor ||| Insulin-like growth factor 1 receptor ||| insulin receptor	19.7328	20.1163	20.886	20.4106	19.2005	20.2561	19.7121	19.3982	19.3432	18.9939	19.3226		19.5255	20.3848	19.498	20.3203	20.6418	19.265	19.9246	20.6483	19.7283	19.5551	19.1686	19.3226	19.9552	19.9092	19.9534	20.1004	19.3488	19.9393	-0.751626
ph_Q9UHR4:276	Q9UHR4	0	0	0	3.11007e-07	2	0.065561	1;2	0.997593	KDY(1)DT(0.998)LS(0.002)KCSPK	276	T	55971	BAIAP2L1	IRTKS	protein-coding	7q21.3-q22.1	BAR/IMD domain containing adaptor protein 2 like 1 ||| Brain-specific angiogenesis inhibitor 1-associated protein 2-like protein 1	21.0132		21.5094	21.1377	21.4727	20.9387		19.837	23.5324				19.8012	19.2112	20.0749			19.3685	21.0132	21.3236	21.2057	19.837	23.5324	NA	19.5062	20.0749	19.3685	21.1808	21.6847	19.6499	0.503862
ph_Q13443:778	Q13443	0	0	0	0.00055797	2	0.27828	1	0.962962	FAVPT(0.037)Y(0.963)AAK	778	Y	8754	ADAM9	CORD9 MCMP MDC9 Mltng	protein-coding	8p11.22	ADAM metallopeptidase domain 9 ||| Disintegrin and metalloproteinase domain-containing protein 9	21.4738	18.6302	21.837	21.6262	21.936	18.978	21.5783	21.6598	21.5438	21.7939		21.7607	19.1299	21.6249	21.1219	19.0237	18.3927	21.5621	20.052	21.7316	20.457	21.619	21.6689	21.7607	20.3774	20.0728	19.9774	20.7469	21.6829	20.1425	0.935995
ph_P10586;Q13332:1381;1422	P10586;Q13332	0	0	0	0.000194829	2	-1.3104	1	0.999998	Y(1)ANVIAYDHSR	1381;1422	Y	5789 5792 5802	PTPRD PTPRF PTPRS	HPTP HPTPD HPTPDELTA PTPD RPTPDELTA BNAH2 LAR PTPSIGMA R-PTP-S R-PTP-sigma	protein-coding	9p24.1-p23!1p34.2!19p13.3	protein tyrosine phosphatase receptor type D ||| Receptor-type tyrosine-protein phosphatase delta ||| protein tyrosine phosphatase receptor type F ||| Receptor-type tyrosine-protein phosphatase F ||| protein tyrosine phosphatase receptor type S ||| Receptor-type tyrosine-protein phosphatase S	19.4163	19.3499	19.1223		19.6233	19.4103	19.7318	19.7883	20.0708	19.3844	19.436	19.7724			18.9809		18.9978		19.3831	19.1223	19.5168	19.7601	19.7276	19.6042	NA	18.9809	18.9978	19.3407	19.6973	18.9893	0.356541
ph_P08581:1234	P08581	0	0	0	0	3	-0.13382	1;2	0.99887	DMYDKEY(0.999)Y(0.961)S(0.041)VHNKTGAK	1234	Y	4233	MET	AUTS9 DFNB97 HGFR RCCP2 c-Met	protein-coding	7q31.2	MET proto-oncogene, receptor tyrosine kinase ||| Hepatocyte growth factor receptor	26.4587	26.4562	26.8187	26.3902	26.5337	26.3529	24.5558	24.4254	24.5747	24.2736	24.0604	23.6803	20.2754	20.2596	20.4933	20.1274	20.1825	19.8782	26.4574	26.6044	26.4433	24.4906	24.4242	23.8703	20.2675	20.3103	20.0303	26.5017	24.2617	20.2027	-2.24003
ph_Q96Q15:2150	Q96Q15	0	0	0	0.0021289	1	0.10237	1	0.905106	S(0.085)Y(0.905)PY(0.009)LFK	2150	Y	23049	SMG1	61E3.4 ATX LIP	protein-coding	16p12.3	SMG1 nonsense mediated mRNA decay associated PI3K related kinase ||| Serine/threonine-protein kinase SMG1	22.2847	22.9393	21.9501	22.8003	22.7666	23.2778			20.1903	20.592		20.2953	16.9674	17.0941	17.0241	17.6731	16.9305	17.6058	22.612	22.3752	23.0222	NA	20.3912	20.2953	17.0307	17.3486	17.2681	22.6698	20.3432	17.2158	-2.32657
ph_O75955:203	O75955	0	0	0	1.62335e-55	2	-0.48523	1	0.999955	VSAQY(1)LSEIEMAK	203	Y	10211	FLOT1	---	protein-coding	6p21.33	flotillin 1 ||| Flotillin-1	23.5478	24.0446	23.8546	24.1769	23.8141	23.9267	22.2626	22.4662	22.3737	22.6051	21.8846	22.2239	20.048			20.1945		20.0923	23.7962	24.0158	23.8704	22.3644	22.4894	22.0543	20.048	20.1945	20.0923	23.8941	22.3027	20.1116	-1.59142
ph_Q08357:377	Q08357	0	0	0	4.7435e-34	3	-0.065807	1	0.96763	IHIDRGPEEKPAQES(0.032)NY(0.968)R	377	Y	6575	SLC20A2	GLVR-2 GLVR2 IBGC1 IBGC2 IBGC3 MLVAR PIT-2 PIT2 RAM1 Ram-1	protein-coding	8p11.21	solute carrier family 20 member 2 ||| Sodium-dependent phosphate transporter 2	22.2403	22.4455	22.7386		22.2816		20.3774	19.9884			19.4674	19.7554	18.3836		17.8989	17.1759	18.3987		22.3429	22.7386	22.2816	20.1829	NA	19.6114	18.3836	17.5374	18.3987	22.4544	19.8972	18.1066	-2.55721
ph_P30530:866	P30530	0	0	0	9.92411e-132	2	-0.18614	1	1	Y(1)VLCPSTTPSPAQPADR	866	Y	558	AXL	ARK JTK11 Tyro7 UFO	protein-coding	19q13.2	AXL receptor tyrosine kinase ||| Tyrosine-protein kinase receptor UFO	24.8955	24.71	25.2771	24.442	25.4462	25.0795	22.6583	22.3313	22.9342	22.4812	22.7521	22.6082	22.1505	21.6174	21.9954	21.9743	22.5217	21.9908	24.8027	24.8596	25.2628	22.4948	22.7077	22.6801	21.8839	21.9848	22.2562	24.975	22.6275	22.0417	-2.34751
ph_Q99569:1115	Q99569	0	0	0	1.83412e-52	3	-0.7297	1	0.999953	LQHQQLY(1)YSQDDSNRK	1115	Y	8502	PKP4	p0071	protein-coding	2q24.1	plakophilin 4 ||| Plakophilin-4	22.0107	21.9278	22.6622	22.0522	21.8267	21.6912	19.5193	19.6159	19.9071	20.0938	19.301	19.3551	19.5012	18.9046	18.7243	18.571	18.4938	18.1271	21.9693	22.3572	21.759	19.5676	20.0005	19.328	19.2029	18.6476	18.3104	22.0285	19.632	18.7203	-2.39646
ph_Q7Z2W4:410	Q7Z2W4	0	0	0	7.22335e-78	2	-0.086641	1	0.999884	KGTGLLSSDY(1)R	410	Y	56829	ZC3HAV1	ARTD13 FLB6421 PARP13 ZAP ZC3H2 ZC3HDC2	protein-coding	7q34	zinc finger CCCH-type containing, antiviral 1 ||| Zinc finger CCCH-type antiviral protein 1	22.4505	22.3794	22.7023	22.8982	22.3743	22.525	20.9413	20.892	20.8767	21.2156		20.4093	19.1757		19.8657	19.7105	19.5049	19.7271	22.415	22.8002	22.4497	20.9166	21.0462	20.4093	19.1757	19.7881	19.616	22.5549	20.7907	19.5266	-1.76423
ph_Q9Y446:84	Q9Y446	0	0	0	9.39309e-70	2	1.1533	1	1	GQY(1)HTLQAGFSSR	84	Y	11187	PKP3	---	protein-coding	11p15.5	plakophilin 3 ||| Plakophilin-3	22.0694	22.0398	22.6472	22.1048	22.2746	22.0963	20.6579		20.9269	20.7788	20.7341		20.1355	19.9649	20.3743	20.1664		19.8373	22.0546	22.376	22.1855	20.6579	20.8528	20.7341	20.0502	20.2704	19.8373	22.2054	20.7483	20.0526	-1.45705
ph_O60716:904	O60716	0	0	0	8.45636e-55	2	-0.078756	1	0.999605	SLDNNY(1)STPNER	904	Y	1500 100528016	CTNND1 TMX2-CTNND1	BCDS2 CAS CTNND P120CAS P120CTN p120 p120(CAS) p120(CTN) CTNND1 p120(cas) p120(ctn)	protein-coding|ncRNA	11q12.1	catenin delta 1 ||| TMX2-CTNND1 readthrough (NMD candidate) ||| Catenin delta-1	24.8493	24.6782	25.4559	25.1955	25.1782	24.8048	23.2301	23.1563	23.8794	23.6409	23.1965	22.9732	22.5431	22.4582	22.5724	22.3647	22.4786	22.0356	24.7638	25.3257	24.9915	23.1932	23.7602	23.0849	22.5006	22.4686	22.2571	25.027	23.3461	22.4088	-1.68092
ph_Q06124:595	Q06124	0	0	0	5.29325e-52	3	2.5539	2	1	VY(1)ENVGLMQQQKS(1)FR	595	S	5781	PTPN11	BPTP3 CFC JMML METCDS NS1 PTP-1D PTP2C SH-PTP2 SH-PTP3 SHP2	protein-coding	12q24.13	protein tyrosine phosphatase non-receptor type 11 ||| Tyrosine-protein phosphatase non-receptor type 11	20.9096	20.9934	21.2572	21.1892	20.7769	20.4926	19.1497	19.3531	19.6545		18.9527	18.507	18.5375		18.7484	18.6023	18.769	17.9957	20.9515	21.2232	20.6347	19.2514	19.6545	18.7299	18.5375	18.6754	18.3823	20.9365	19.2119	18.5317	-1.72454
ph_O60716:335	O60716	0	0	0	3.07397e-16	3	0.094119	1	0.705217	SYEDMIGEEVPS(0.077)DQY(0.218)Y(0.705)WAPLAQHER	335	Y	1500 100528016	CTNND1 TMX2-CTNND1	BCDS2 CAS CTNND P120CAS P120CTN p120 p120(CAS) p120(CTN) CTNND1 p120(cas) p120(ctn)	protein-coding|ncRNA	11q12.1	catenin delta 1 ||| TMX2-CTNND1 readthrough (NMD candidate) ||| Catenin delta-1		20.2845	20.2075	20.7518	20.6433	20.7941	19.1189	19.1282			18.3631	19.0309	17.7711	18.0353	18.0497	17.5372	17.9747	17.8388	20.2845	20.4796	20.7187	19.1235	NA	18.697	17.9032	17.7935	17.9068	20.4943	18.9103	17.8678	-1.58401
ph_Q8IV08:7	Q8IV08	0	0	0	4.10331e-07	2	-0.020768	1	1	LMY(1)QELK	7	Y	23646	PLD3	AD19 HU-K4 HUK4 SCA46	protein-coding	19q13.2	phospholipase D family member 3 ||| 5'-3' exonuclease PLD3	21.8265	22.2808	21.7285	21.8363	22.5098	22.9818	21.9063		21.8838	22.241	21.9359	22.1087		19.6777			19.5133		22.0537	21.7824	22.7458	21.9063	22.0624	22.0223	19.6777	NA	19.5133	22.1939	21.997	19.5955	-0.196942
ph_O43491:614	O43491	0	0	0	6.81188e-153	3	0.32066	2	1	KNS(1)LRVEGDNIY(1)VR	614	S	2037	EPB41L2	4.1-G 4.1G	protein-coding	6q23.1-q23.2	erythrocyte membrane protein band 4.1 like 2 ||| Band 4.1-like protein 2	24.0076	24.1527	24.312	23.9925	24.0819	24.1857	23.4283	23.5244	23.4144	23.3431	23.1566	23.4499	22.6939	22.8211	22.7127	22.598	22.636	22.3739	24.0802	24.1522	24.1338	23.4764	23.3788	23.3032	22.7575	22.6554	22.5049	24.1221	23.3861	22.6393	-0.735949
ph_Q12929:525	Q12929	0	0	0	5.19772e-09	2	0.78101	1	1	HIDRNY(1)EPLK	525	Y	2059	EPS8	DFNB102	protein-coding	12p12.3	epidermal growth factor receptor pathway substrate 8 ||| Epidermal growth factor receptor kinase substrate 8	20.4967	20.2756	20.5846	20.235	19.966	20.2321		19.3328	19.3473	19.2893	19.2243	18.9546	18.3465	18.8824	18.7419	18.53			20.3862	20.4098	20.099	19.3328	19.3183	19.0894	18.6144	18.6359	NA	20.2983	19.2468	18.6252	-1.05151
ph_Q99569:421	Q99569	0	0	0	2.96415e-13	2	0.7721	1	0.999454	TYY(0.999)SPVYR	421	Y	8502	PKP4	p0071	protein-coding	2q24.1	plakophilin 4 ||| Plakophilin-4	21.2046	21.4239	21.5592	22.0936	21.5692	21.7128	20.3746	20.595	20.4656	20.6275	20.2852	20.5222	19.9605	20.0243	19.8421	19.8429	19.6256	19.7471	21.3142	21.8264	21.641	20.4848	20.5466	20.4037	19.9924	19.8425	19.6863	21.5939	20.4784	19.8404	-1.11553
ph_Q9HAU0:398	Q9HAU0	0	0	0	1.71392e-28	3	-0.11308	1	0.972458	GGNRPNTGPLY(0.972)T(0.027)EADRVIQR	398	Y	54477	PLEKHA5	PEPP-2 PEPP2	protein-coding	12p12.3	pleckstrin homology domain containing A5 ||| Pleckstrin homology domain-containing family A member 5	20.7855		20.9179				19.2441	19.3521	19.1214			18.6246			18.705	18.1055		17.8014	20.7855	20.9179	NA	19.2981	19.1214	18.6246	NA	18.4052	17.8014	20.8517	19.0147	18.1033	-1.83698
ph_P56211:59	P56211	0	0	0	0.000155937	2	-0.08786	1	0.99785	Y(0.998)FDS(0.001)GDY(0.001)NMAK	59	Y	10776 2029	ARPP19 ENSA	ARPP-16 ARPP-19 ARPP16 ENSAL ARPP-19e	protein-coding	15q21.2!1q21.3	cAMP regulated phosphoprotein 19 ||| cAMP-regulated phosphoprotein 19 ||| endosulfine alpha ||| Alpha-endosulfine		19.9176	20.0045	19.5442		19.908	19.0112		19.3082	18.9495	19.0176		18.5366		18.5712		17.8909	18.5324	19.9176	19.7744	19.908	19.0112	19.1289	19.0176	18.5366	18.5712	18.2117	19.8667	19.0525	18.4398	-0.814125
ph_Q8WUD1:3	Q8WUD1	0	0	0	0.0180778	2	0.20966	---	0.983916	T(0.016)Y(0.984)AYLFK	3	Y	84932	RAB2B	---	protein-coding	14q11.2	RAB2B, member RAS oncogene family ||| Ras-related protein Rab-2B	19.8126	20.2533	19.6533	20.2053	20.335	20.6435	20.0166	20.4203	19.9096	14.2507	20.3063		17.0334	18.2769	17.443	17.1992	17.6329	17.7367	20.033	19.9293	20.4893	20.2185	17.0802	20.3063	17.6552	17.3211	17.6848	20.1505	19.2016	17.5537	-0.948867
ph_Q99569:443	Q99569	0	0	0	3.55283e-15	3	0.57204	1	0.99693	SPNHGTVELQGS(0.001)QT(0.002)ALY(0.997)R	443	Y	8502	PKP4	p0071	protein-coding	2q24.1	plakophilin 4 ||| Plakophilin-4	19.9721		20.4388			20.1739	19.505		19.1291	19.2445	19.3449	18.618			18.4817			18.4509	19.9721	20.4388	20.1739	19.505	19.1868	18.9815	NA	18.4817	18.4509	20.1949	19.2244	18.4663	-0.970511
ph_O95297:263	O95297	0	0	0	7.0848e-18	2	-0.37756	1;2	0.999999	SESVVY(1)ADIR	263	Y	9019	MPZL1	MPZL1b PZR PZR1b PZRa PZRb	protein-coding	1q24.2	myelin protein zero like 1 ||| Myelin protein zero-like protein 1	24.1831	21.6807	21.9243	21.278	21.8423	21.5333	21.2504	21.0868	21.0917	21.136	21.0088	20.8297	19.9805		19.91	20.033		19.9439	22.9319	21.6012	21.6878	21.1686	21.1138	20.9193	19.9805	19.9715	19.9439	22.0736	21.0672	19.9653	-1.0064
ph_P29353:426	P29353	0	0	0	1.86565e-26	3	1.5299	1	0.550645	ELFDDPS(0.551)Y(0.449)VNVQNLDKAR	426	S	6464	SHC1	SHC SHCA	protein-coding	1q21.3	SHC adaptor protein 1 ||| SHC-transforming protein 1		22.0756				21.2103	20.2372	20.2358	19.9454			19.5221	18.507	18.9162	19.0435	19.1401	19.281		22.0756	NA	21.2103	20.2365	19.9454	19.5221	18.7116	19.0918	19.281	21.643	19.9013	19.0281	-1.74163
ph_O75955:238	O75955	0	0	0	3.42166e-08	2	0.14467	1	1	RAQADLAY(1)QLQVAK	238	Y	10211	FLOT1	---	protein-coding	6p21.33	flotillin 1 ||| Flotillin-1	19.4864	19.6155	19.5603		19.5709		19.4394		19.281		19.4916		18.2383	18.5536	18.2133	18.304	18.4125		19.551	19.5603	19.5709	19.4394	19.281	19.4916	18.3959	18.2586	18.4125	19.5607	19.404	18.3557	-0.156737
ph_Q96PD2:597	Q96PD2	0	0	0	1.42305e-06	2	0.020089	1	0.935485	Y(0.935)S(0.064)SSEVNHLSPR	597	Y	131566	DCBLD2	CLCP1 ESDN	protein-coding	3q12.1|3	discoidin, CUB and LCCL domain containing 2 ||| Discoidin, CUB and LCCL domain-containing protein 2	20.1204	19.7368	20.5595	20.5539	20.4459	20.6644	19.2706		20.2966	20.2443	19.2982		18.4295			18.3013			19.9286	20.5567	20.5551	19.2706	20.2705	19.2982	18.4295	18.3013	NA	20.3468	19.6131	18.3654	-0.73373
ph_O60716:334	O60716	0	0	0	5.7304e-18	3	-0.14824	1	0.618426	SYEDMIGEEVPS(0.202)DQY(0.618)Y(0.179)WAPLAQHER	334	Y	1500 100528016	CTNND1 TMX2-CTNND1	BCDS2 CAS CTNND P120CAS P120CTN p120 p120(CAS) p120(CTN) CTNND1 p120(cas) p120(ctn)	protein-coding|ncRNA	11q12.1	catenin delta 1 ||| TMX2-CTNND1 readthrough (NMD candidate) ||| Catenin delta-1			19.6827			20.4321	18.7564	19.1271		18.8018	18.0492	18.6945	17.3288			17.9848		17.9841	NA	19.6827	20.4321	18.9418	18.8018	18.3718	17.3288	17.9848	17.9841	20.0574	18.7051	17.7659	-1.35228
ph_O95832:210	O95832	0	0	0	2.16449e-09	2	0.43805	1	0.999384	PYPKPAPSSGKDY(0.999)V	210	Y	9076	CLDN1	CLD1 ILVASC SEMP1	protein-coding	3q28	claudin 1 ||| Claudin-1	22.0481		21.7978	22.0325	21.9684	22.2241	21.4958	21.8662				21.2562	20.3657	20.7723	20.836	20.5074	20.8297	20.5015	22.0481	21.9151	22.0962	21.681	NA	21.2562	20.569	20.6717	20.6656	22.0198	21.4686	20.6354	-0.551238
ph_P16144:1510	P16144	0	0	0	1.40235e-15	2	-0.082778	1	0.999675	DY(1)STLTSVSSHDSR	1510	Y	3691	ITGB4	CD104 GP150	protein-coding	17q25.1	integrin subunit beta 4 ||| Integrin beta-4	20.04		20.6861	20.246	20.5645				19.704	19.4512	19.2929	18.6942	18.5053	17.7454	18.9521	18.7127	19.2046	18.4091	20.04	20.466	20.5645	NA	19.5776	18.9935	18.1254	18.8324	18.8069	20.3568	19.2856	18.5882	-1.07127
ph_Q96PD2:732	Q96PD2	0	0	0	1.06971e-05	2	-0.23549	1	0.762991	TDSCS(0.002)S(0.005)AQAQY(0.763)DT(0.23)PK	732	Y	131566	DCBLD2	CLCP1 ESDN	protein-coding	3q12.1|3	discoidin, CUB and LCCL domain containing 2 ||| Discoidin, CUB and LCCL domain-containing protein 2			20.9937		21.5855		20.2079	20.1989				19.8536		19.6231	19.6825	19.2875		18.8972	NA	20.9937	21.5855	20.2034	NA	19.8536	19.6231	19.485	18.8972	21.2896	20.0285	19.3351	-1.26109
ph_O75955:223	O75955	0	0	0	0.000507789	2	-0.16394	1	0.999976	KAAY(1)DIEVNTR	223	Y	10211	FLOT1	---	protein-coding	6p21.33	flotillin 1 ||| Flotillin-1	20.2344	20.1057	20.4713	20.3412	20.6993		20.2527		20.4523	20.3832			19.6326			18.9601	19.2672		20.17	20.4062	20.6993	20.2527	20.4178	NA	19.6326	18.9601	19.2672	20.4252	20.3352	19.2866	-0.0899637
ph_P27361:202	P27361	0	0	0	1.99916e-30	3	0.05241	2	0.998354	IADPEHDHTGFLT(0.998)EY(0.988)VAT(0.013)R	202	T	5595	MAPK3	ERK-1 ERK1 ERT2 HS44KDAP HUMKER1A P44ERK1 P44MAPK PRKM3 p44-ERK1 p44-MAPK	protein-coding	16p11.2	mitogen-activated protein kinase 3	20.9351	21.1182	20.5834	21.0584	20.6443		21.0741	21.1957	20.9558	20.7593	20.7276		21.9329	21.7763	21.8743	21.8464	21.9122	21.8909	21.0267	20.8209	20.6443	21.1349	20.8576	20.7276	21.8546	21.8604	21.9015	20.8306	20.9067	21.8722	0.0760573
ph_P06493:14	P06493	0	0	0	1.01778e-244	3	-0.25395	1;2	1	IGEGT(1)Y(1)GVVYKGR	14	T	983	CDK1	CDC2 CDC28A P34CDC2	protein-coding	10q21.2	cyclin dependent kinase 1 ||| Cyclin-dependent kinase 1	26.8193	26.8549	27.0628	26.7632	27.6605	27.4354	27.3554	27.4616	27.5446	27.5268	27.7263	27.7998	28.3549	27.9323	28.0981	28.3736	28.2211	28.0944	26.8371	26.913	27.548	27.4085	27.5357	27.7631	28.1436	28.2358	28.1577	27.0994	27.5691	28.179	0.469734
ph_P06493:15	P06493	0	0	0	1.01778e-244	2	-0.70634	1;2	1	IGEGT(1)Y(1)GVVYKGR	15	Y	983	CDK1	CDC2 CDC28A P34CDC2	protein-coding	10q21.2	cyclin dependent kinase 1 ||| Cyclin-dependent kinase 1	27.5579	27.5331	27.7997	27.4646	28.1949	28.0196	28.0362	28.0119	28.0838	27.9967	28.2738	28.2938	28.9724	28.5463	28.6311	28.8455	28.8424	28.7132	27.5455	27.6321	28.1072	28.024	28.0403	28.2838	28.7594	28.7383	28.7778	27.7616	28.116	28.7585	0.354389
ph_P28482:187	P28482	0	0	0	1.65471e-216	3	-0.086102	1;2	0.998424	VADPDHDHTGFLT(1)EY(0.998)VAT(0.002)R	187	Y	5594	MAPK1	ERK ERK-2 ERK2 ERT1 MAPK2 P42MAPK PRKM1 PRKM2 p38 p40 p41 p41mapk p42-MAPK	protein-coding	22q11.22	mitogen-activated protein kinase 1	27.6411	27.6964	27.332	27.0739	27.5883	27.4956	27.6941	27.589	27.2559	27.1556	27.6283	27.6868	28.3601	28.1124	27.9394	28.0683	28.0695	28.0251	27.6687	27.2029	27.5419	27.6415	27.2057	27.6575	28.2363	28.0039	28.0473	27.4712	27.5016	28.0958	0.0304216
ph_P30530:702	P30530	0	0	0	1.03212e-209	2	-0.28155	1;2	0.999988	KIYNGDY(1)Y(1)RQGR	702	Y	558	AXL	ARK JTK11 Tyro7 UFO	protein-coding	19q13.2	AXL receptor tyrosine kinase ||| Tyrosine-protein kinase receptor UFO	26.9603	27.3599	27.2228	27.3893	27.5095	27.6748	22.3067	22.6336	22.4346	22.5242	22.5728	22.4996	21.9349		21.9483	22.0651	21.9613	22.0889	27.1601	27.306	27.5922	22.4701	22.4794	22.5362	21.9349	22.0067	22.0251	27.3528	22.4952	21.9889	-4.85752
ph_Q06418:685	Q06418	0	0	0	3.07762e-07	2	0.96241	1;2	0.956497	KIY(0.999)S(0.04)GDY(0.956)Y(0.005)R	685	Y	10461 7301	MERTK TYRO3	MER RP38 Tyro12 c-Eyk c-mer BYK Dtk Etk-2 RSE Rek Sky Tif	protein-coding	2q13!15q15.1	MER proto-oncogene, tyrosine kinase ||| Tyrosine-protein kinase Mer ||| TYRO3 protein tyrosine kinase ||| Tyrosine-protein kinase receptor TYRO3	21.075	20.5946	22.2274	20.9132	20.8185	22.2896	17.3689	17.709	17.9629	18.1291		17.8495	17.6272	17.2481	16.4015	17.6038	17.4145	17.4207	20.8348	21.5703	21.554	17.5389	18.046	17.8495	17.4376	17.0026	17.4176	21.3197	17.8115	17.286	-3.5082
ph_P30530:703	P30530	0	0	0	2.71667e-67	2	0.09506	1;2	0.999999	IYNGDY(1)Y(1)RQGR	703	Y	558	AXL	ARK JTK11 Tyro7 UFO	protein-coding	19q13.2	AXL receptor tyrosine kinase ||| Tyrosine-protein kinase receptor UFO	23.5294	23.6917	23.9589	23.9861	24.013	24.0921	19.0337	20.6432	20.6545	19.0152	20.6086	20.5954	18.6916	22.0547	19.1041	19.4321	18.6325	19.4491	23.6106	23.9725	24.0525	19.8384	19.8349	20.602	20.3732	19.2681	19.0408	23.8785	20.0918	19.5607	-3.78677
ph_O60716:96	O60716	0	0	0	2.1492e-177	3	-0.10533	1	0.798248	LNGPQDHS(0.001)HLLY(0.798)S(0.167)T(0.034)IPR	96	Y	1500 100528016	CTNND1 TMX2-CTNND1	BCDS2 CAS CTNND P120CAS P120CTN p120 p120(CAS) p120(CTN) CTNND1 p120(cas) p120(ctn)	protein-coding|ncRNA	11q12.1	catenin delta 1 ||| TMX2-CTNND1 readthrough (NMD candidate) ||| Catenin delta-1	24.4833	24.5711	24.9034	24.3025	24.4313	24.2913	22.8312	22.9378	22.9407	22.9714	22.9658	22.6984	22.663	22.4164	22.447	22.3866	22.7572	22.3895	24.5272	24.6029	24.3613	22.8845	22.9561	22.8321	22.5397	22.4168	22.5734	24.4971	22.8909	22.51	-1.60626
ph_Q09666:5841	Q09666	0	0	0	9.39554e-150	3	0.19948	2	0.982259	S(0.023)KGHY(0.974)EVT(0.021)GS(0.982)DDETGKLQGSGVSLASK	5841	S	79026	AHNAK	AHNAKRS PM227	protein-coding	11q12.3	AHNAK nucleoprotein ||| Neuroblast differentiation-associated protein AHNAK	23.3238	23.3168	23.9552	23.0184	23.6639	23.2163		20.2779			20.5494	19.3293	20.4745	20.4845	20.4837		20.282	20.3392	23.3203	23.4868	23.4401	20.2779	NA	19.9394	20.4795	20.4837	20.3106	23.4157	20.1087	20.4246	-3.30709
ph_O43491:623	O43491	0	0	0	0	2	0.13218	1;2	1	VEGDNIY(1)VR	623	Y	2037	EPB41L2	4.1-G 4.1G	protein-coding	6q23.1-q23.2	erythrocyte membrane protein band 4.1 like 2 ||| Band 4.1-like protein 2	26.3764	26.6024	26.9206	26.6146	26.4613	26.3984	25.2004	25.2583	25.0747	25.1199	24.7532	25.0277	24.6829	24.7751	24.3939	24.4093	24.4612	24.2345	26.4894	26.7676	26.4298	25.2294	25.0973	24.8905	24.729	24.4016	24.3479	26.5623	25.0724	24.4928	-1.48989
ph_Q06124:584	Q06124	0	0	0	5.61747e-257	3	2.5539	1;2	1	VY(1)ENVGLMQQQKS(1)FR	584	Y	5781	PTPN11	BPTP3 CFC JMML METCDS NS1 PTP-1D PTP2C SH-PTP2 SH-PTP3 SHP2	protein-coding	12q24.13	protein tyrosine phosphatase non-receptor type 11 ||| Tyrosine-protein phosphatase non-receptor type 11	23.3311	23.2977	23.6544	23.6268	23.1374	23.0201	21.844	21.7186	22.1341	21.7516	21.4316	21.4103	21.3944	20.9817	21.391	21.1928	20.9909	20.8374	23.3144	23.6406	23.0788	21.7813	21.9429	21.4209	21.1881	21.2919	20.9142	23.3446	21.715	21.1314	-1.62956
ph_P25116:420	P25116	0	0	0	1.9542e-43	2	-0.2398	1;2	1	MDTCSSNLNNS(1)IY(1)KK	420	Y	2149	F2R	CF2R HTR PAR-1 PAR1 TR	protein-coding	5q13.3	coagulation factor II thrombin receptor ||| Proteinase-activated receptor 1	22.5491	22.6194	22.9716	21.641	22.8671	21.4579	21.4518	19.7799	21.7969	20.4097	20.183	20.0219	20.5429	19.4746	20.0255	20.3949	20.13	19.6392	22.5842	22.3063	22.1625	20.6159	21.1033	20.1025	20.0088	20.2102	19.8846	22.351	20.6072	20.0345	-1.7438
ph_Q03135:14	Q03135	0	0	0	4.37529e-232	3	0.19606	1	0.998634	YVDSEGHLY(0.999)T(0.001)VPIREQGNIYKPNNK	14	Y	857	CAV1	BSCL3 CGL3 LCCNS MSTP085 PPH3 VIP21	protein-coding	7q31.2	caveolin 1 ||| Caveolin-1	22.9438	22.8695	23.332	23.0019	23.772	23.4403	20.6628	20.2742	21.2413	20.7881	20.7314	20.6761	20.9546		21.0752	20.9835	20.6327	20.5187	22.9066	23.1669	23.6062	20.4685	21.0147	20.7037	20.9546	21.0293	20.5757	23.2266	20.729	20.8532	-2.49759
ph_P22681:674	P22681	0	0	0	4.65581e-36	3	-0.20082	1	0.778514	IKPSSSANAIY(0.779)S(0.221)LAARPLPVPK	674	Y	867	CBL	C-CBL CBL2 FRA11B NSLL RNF55	protein-coding	11q23.3	Cbl proto-oncogene ||| E3 ubiquitin-protein ligase CBL	22.8228	22.2245	22.515	22.1361	21.6535		19.9426	19.5101	19.8696	19.6997		19.4404		19.5954	19.7131		19.2552	19.3927	22.5236	22.3255	21.6535	19.7263	19.7847	19.4404	19.5954	19.7131	19.324	22.1676	19.6505	19.5441	-2.51708
ph_O60716:228	O60716	0	0	0	0	3	0.21407	1;2	0.998653	HYEDGYPGGSDNY(0.999)GS(0.001)LSR	228	Y	1500 100528016	CTNND1 TMX2-CTNND1	BCDS2 CAS CTNND P120CAS P120CTN p120 p120(CAS) p120(CTN) CTNND1 p120(cas) p120(ctn)	protein-coding|ncRNA	11q12.1	catenin delta 1 ||| TMX2-CTNND1 readthrough (NMD candidate) ||| Catenin delta-1	25.6037	25.5862	25.9335	25.9595	25.6115	25.5569	24.6322	24.4598	24.5916	24.5222	24.0846	24.2686	23.9803	24.2413	23.9526	23.7724	24.0822	23.7156	25.5949	25.9465	25.5842	24.546	24.5569	24.1766	24.1108	23.8625	23.8989	25.7085	24.4265	23.9574	-1.28203
ph_O60716:248	O60716	0	0	0	4.38482e-06	2	0.092965	1	0.999994	YRPSMEGY(1)R	248	Y	1500 100528016	CTNND1 TMX2-CTNND1	BCDS2 CAS CTNND P120CAS P120CTN p120 p120(CAS) p120(CTN) CTNND1 p120(cas) p120(ctn)	protein-coding|ncRNA	11q12.1	catenin delta 1 ||| TMX2-CTNND1 readthrough (NMD candidate) ||| Catenin delta-1	21.3363		21.6892	21.6488	21.196	21.2546	20.1398	20.3111			20.0971	19.8891	19.3529	19.6442	19.6272	19.8291		19.5831	21.3363	21.669	21.2253	20.2254	NA	19.9931	19.4985	19.7282	19.5831	21.4102	20.1093	19.6033	-1.3009
ph_Q96D31:300	Q96D31	0	0	0	7.71793e-37	2	0.37576	1	0.999878	GDHPLTPGSHY(1)A	300	Y	84876	ORAI1	CRACM1 IMD9 ORAT1 TAM2 TMEM142A	protein-coding	12q24.31	ORAI calcium release-activated calcium modulator 1 ||| Calcium release-activated calcium channel protein 1			23.2005		22.8939				20.9778	21.1807	21.0727	21.1701	20.4612	20.64	20.6245	20.7851	20.7699	20.5632	NA	23.2005	22.8939	NA	21.0793	21.1214	20.5506	20.7048	20.6666	23.0472	21.1003	20.6407	-1.94692
ph_Q12965:7	Q12965	0	0	0	2.80269e-12	2	0.15384	1	0.997013	GVY(0.997)QY(0.003)HWQSHNVK	7	Y	4643	MYO1E	FSGS6 HuncM-IC MYO1C	protein-coding	15q22.2	myosin IE ||| Unconventional myosin-Ie	22.8971	22.9687	23.2774	23.0279	22.4756	22.3082	21.29	21.261	21.538	21.6651	20.6389	20.8742	20.976	21.0748	21.1131	21.042	20.4796	20.1647	22.9329	23.1526	22.3919	21.2755	21.6016	20.7565	21.0254	21.0776	20.3221	22.8258	21.2112	20.8084	-1.61462
ph_Q96HC4:251	Q96HC4	0	0	0	2.2625e-55	2	0.024228	1	0.999981	YTEFY(1)HVPTHSDASK	251	Y	10611	PDLIM5	ENH ENH1 L9 LIM	protein-coding	4q22.3	PDZ and LIM domain 5 ||| PDZ and LIM domain protein 5	21.0046	20.7982	21.3797	20.9868	21.059		19.9925	19.615		19.8362	19.782	19.3729	19.4323	19.7056	19.333	19.0325	19.938	19.5104	20.9014	21.1833	21.059	19.8037	19.8362	19.5775	19.569	19.1827	19.7242	21.0479	19.7391	19.492	-1.30877
ph_O60716:230	O60716	0	0	0	0	2	0.012549	1;2	0.988663	HYEDGYPGGS(0.006)DNYGS(0.989)LS(0.005)R	230	S	1500 100528016	CTNND1 TMX2-CTNND1	BCDS2 CAS CTNND P120CAS P120CTN p120 p120(CAS) p120(CTN) CTNND1 p120(cas) p120(ctn)	protein-coding|ncRNA	11q12.1	catenin delta 1 ||| TMX2-CTNND1 readthrough (NMD candidate) ||| Catenin delta-1	25.1709		25.8166	25.3784	25.2855	24.9011	21.419	21.1622	19.9236	23.9903	23.9098	23.4955	23.6885	20.128		23.183	19.5751	23.073	25.1709	25.5975	25.0933	21.2906	21.9569	23.7026	21.9083	23.183	21.3241	25.2872	22.3167	22.1384	-2.97051
ph_Q9NUE0:19	Q9NUE0	0	0	0	5.58263e-07	3	0.11686	2	0.99949	MKDCEY(0.996)QQIS(0.005)PGAAPLPAS(0.999)PGAR	19	S	84243	ZDHHC18	DHHC-18 DHHC18	protein-coding	1p36.11	zinc finger DHHC-type palmitoyltransferase 18 ||| Palmitoyltransferase ZDHHC18	20.9096		21.0038	20.7938		20.5552	19.6264	19.5608	19.6523	19.5271	19.4871		19.5092		19.1604	19.2895	19.3187	18.9038	20.9096	20.8988	20.5552	19.5936	19.5897	19.4871	19.5092	19.2249	19.1113	20.7879	19.5568	19.2818	-1.23107
ph_O60716:304	O60716	0	0	0	5.22302e-12	3	-0.12671	1	0.534368	SMGYDDLDYGMMS(0.012)DY(0.454)GT(0.534)ARR	304	T	1500 100528016	CTNND1 TMX2-CTNND1	BCDS2 CAS CTNND P120CAS P120CTN p120 p120(CAS) p120(CTN) CTNND1 p120(cas) p120(ctn)	protein-coding|ncRNA	11q12.1	catenin delta 1 ||| TMX2-CTNND1 readthrough (NMD candidate) ||| Catenin delta-1		20.3533	20.1045	20.3967	19.8401	19.3888	18.1556	18.4604	18.065	18.427	17.7126	18.289	17.8348	18.4143	18.0613	17.8398	17.5841	18.5014	20.3533	20.2506	19.6144	18.308	18.246	18.0008	18.1246	17.9505	18.0427	20.0728	18.1849	18.0393	-1.88784
ph_Q96RT1:1042	Q96RT1	0	0	0	2.49137e-45	2	1.0851	1	1	ANTAY(1)HLHQR	1042	Y	55914	ERBIN	ERBB2IP HEL-S-78 LAP2	protein-coding	5q12.3	erbb2 interacting protein ||| Erbin	21.2991	22.3191	22.3495	22.3473	22.1995	22.2618	20.9724	21.3438	20.9486	20.7416	20.9788	20.6968	20.7496	20.7989	20.6238	20.0488	20.8716	20.3198	21.8091	22.3484	22.2307	21.1581	20.8451	20.8378	20.7743	20.3363	20.5957	22.1294	20.947	20.5688	-1.1824
ph_Q09666:715	Q09666	0	0	0	5.35611e-08	2	0.014198	1	0.999952	VKGEY(1)DVTVPK	715	Y	79026	AHNAK	AHNAKRS PM227	protein-coding	11q12.3	AHNAK nucleoprotein ||| Neuroblast differentiation-associated protein AHNAK	21.6428	21.7518	22.266	22.0045	22.0732	22.0477	20.7356					20.5159	20.5258	20.5182			20.5048	20.2371	21.6973	22.1353	22.0605	20.7356	NA	20.5159	20.522	NA	20.371	21.9644	20.6257	20.4465	-1.33865
ph_P11171:660	P11171	0	0	0	0	2	-0.41084	1	1	LDGENIY(1)IR	660	Y	2035	EPB41	4.1R EL1 HE	protein-coding	1p35.3	erythrocyte membrane protein band 4.1 ||| Protein 4.1	23.5825	23.6251	23.8973	23.9277	23.5094	23.8179	22.6779	22.7251	22.8131	22.9513	22.4942	22.8051	22.3222	22.9614	22.3158	22.3447	22.5887	22.6166	23.6038	23.9125	23.6637	22.7015	22.8822	22.6496	22.6418	22.3302	22.6026	23.7266	22.7444	22.5249	-0.98221
ph_Q9C0B5:529	Q9C0B5	0	0	0	6.03591e-47	3	-0.47179	1;2	0.999537	LVPTGPT(0.001)HREPS(1)PVRY(0.426)DNLS(0.574)R	529	S	25921	ZDHHC5	DHHC5 ZNF375	protein-coding	11q12.1	zinc finger DHHC-type palmitoyltransferase 5 ||| Palmitoyltransferase ZDHHC5	25.9544	26.2029	26.2286	25.8135	25.9101	25.7536	25.118	24.7097	25.215	24.8814	25.48	25.0168	25.1958	24.7834	24.9706	24.6154	24.6789		26.0786	26.021	25.8318	24.9138	25.0482	25.2484	24.9896	24.793	24.6789	25.9772	25.0702	24.8205	-0.907007
ph_P05556:795	P05556	0	0	0	2.47859e-131	2	-1.9929	1	1	SAVTTVVNPKY(1)EGK	795	Y	3688	ITGB1	CD29 FNRB GPIIA MDF2 MSK12 VLA-BETA VLAB	protein-coding	10p11.22	integrin subunit beta 1 ||| Integrin beta-1	22.267	22.3715	22.1579	22.3419	21.9408	22.2486	21.1811		21.1638	21.4215	20.8851	21.126	20.9864	21.3147	21.1488	21.0775	20.81	20.7907	22.3192	22.2499	22.0947	21.1811	21.2926	21.0056	21.1505	21.1131	20.8003	22.2213	21.1598	21.0213	-1.06151
ph_Q9GZY6:136	Q9GZY6	0	0	0	8.46568e-37	3	-0.24858	1	0.992625	FSKPPEDDDANS(0.007)Y(0.993)ENVLICK	136	Y	7462	LAT2	HSPC046 LAB NTAL WBSCR15 WBSCR5 WSCR5	protein-coding	7q11.23	linker for activation of T cells family member 2 ||| Linker for activation of T-cells family member 2	23.7921	24.133	24.198	24.3953	23.9016	23.6474	23.0428	23.3548	23.2424	22.9814	22.722	22.9222	22.9427	22.9241	22.6446	22.6366	22.4225	22.0938	23.9625	24.2966	23.7745	23.1988	23.1119	22.8221	22.9334	22.6406	22.2581	24.0112	23.0443	22.6107	-0.966947
ph_Q8TCZ2:243	Q8TCZ2	0	0	0	4.40167e-52	3	0.61633	1	0.836296	Y(0.836)S(0.139)T(0.024)LHT(0.001)QSAEPPPPPEPARI	243	Y	83692	CD99L2	CD99B MIC2L1	protein-coding	Xq28	CD99 molecule like 2 ||| CD99 antigen-like protein 2	22.9491	22.6904	23.2951	22.7463	23.1137	22.7655	21.7125	21.4317	21.9093	21.5149	22.0231	21.7632	21.5486		21.6664	21.3756	22.138	21.6832	22.8197	23.0207	22.9396	21.5721	21.7121	21.8931	21.5486	21.521	21.9106	22.9267	21.7258	21.6601	-1.20091
ph_Q14247:154	Q14247	0	0	0	2.3235e-09	2	0.2139	1	0.780662	HAS(0.002)QKDY(0.781)S(0.059)S(0.158)GFGGK	154	Y	2017	CTTN	EMS1	protein-coding	11q13.3	cortactin ||| Src substrate cortactin	21.2899	21.3658	21.949				19.8824				19.7965	19.6279	19.3855	19.1789	19.8804	19.7281	19.599	18.8474	21.3278	21.949	NA	19.8824	NA	19.7122	19.2822	19.8042	19.2232	21.6384	19.7973	19.4365	-1.84117
ph_Q9UHR4:274	Q9UHR4	0	0	0	3.5186e-145	2	0.2982	1;2	0.999983	SNVVRKDY(1)DTLSK	274	Y	55971	BAIAP2L1	IRTKS	protein-coding	7q21.3-q22.1	BAR/IMD domain containing adaptor protein 2 like 1 ||| Brain-specific angiogenesis inhibitor 1-associated protein 2-like protein 1	24.9196	25.2419	25.1782	25.3834	24.9197	25.0894	24.1054	24.3121	23.9357	23.7648	23.8686	24.0848	23.9646	24.2002	23.8652	23.9829	23.6532	23.2918	25.0808	25.2808	25.0045	24.2087	23.8502	23.9767	24.0824	23.9241	23.4725	25.122	24.0119	23.8263	-1.11014
ph_P20020:1167	P20020	0	0	0	5.15346e-70	2	-1.4684	1	0.999998	SSLY(1)EGLEKPESR	1167	Y	490 491	ATP2B1 ATP2B2	PMCA1 PMCA1kb PMCA2 PMCA2a PMCA2i	protein-coding	12q21.33!3p25.3	ATPase plasma membrane Ca2+ transporting 1 ||| Plasma membrane calcium-transporting ATPase 1 ||| ATPase plasma membrane Ca2+ transporting 2 ||| Plasma membrane calcium-transporting ATPase 2	22.0533	22.0869	22.446	21.8836	22.1271	21.9944	20.8617	20.5156	20.697	20.4359	20.1728		20.4488				19.9285		22.0701	22.1648	22.0608	20.6886	20.5665	20.1728	20.4488	NA	19.9285	22.0986	20.476	20.1886	-1.62259
ph_Q12965:989	Q12965	0	0	0	2.25878e-104	2	-0.18438	1	0.999597	SLY(1)TSMARPPLPR	989	Y	4643	MYO1E	FSGS6 HuncM-IC MYO1C	protein-coding	15q22.2	myosin IE ||| Unconventional myosin-Ie	20.3999	20.6312	20.8117	20.6102	20.177	19.8494		19.2113	19.7237	19.5157	19.1414			19.1053				18.6975	20.5155	20.711	20.0132	19.2113	19.6197	19.1414	19.1053	NA	18.6975	20.4132	19.3241	18.9014	-1.08911
ph_Q99704:449	Q99704	0	0	0	4.39305e-281	2	0.21674	1	0.999876	SHNSALY(1)SQVQK	449	Y	1796	DOK1	P62DOK pp62	protein-coding	2p13.1	docking protein 1	22.2418	22.2712	22.733	22.1302	22.225	21.885	21.0913	20.4114	21.3404			20.6991	21.0605		20.9692			20.3307	22.2565	22.4316	22.055	20.7513	21.3404	20.6991	21.0605	20.9692	20.3307	22.2477	20.9303	20.7868	-1.31745
ph_Q9UHR4:281	Q9UHR4	0	0	0	1.36461e-05	2	-0.022046	2	0.991813	KDY(0.85)DT(0.134)LS(0.025)KCS(0.992)PK	281	S	55971	BAIAP2L1	IRTKS	protein-coding	7q21.3-q22.1	BAR/IMD domain containing adaptor protein 2 like 1 ||| Brain-specific angiogenesis inhibitor 1-associated protein 2-like protein 1		21.0947	21.7258	21.226	21.0542			20.4952				20.0059	19.9148	19.4383	20.0846	20.0363	19.6258	19.1304	21.0947	21.4759	21.0542	20.4952	NA	20.0059	19.6765	20.0605	19.3781	21.2083	20.2506	19.705	-0.957697
ph_Q12929:485	Q12929	0	0	0	6.92472e-136	3	-0.67574	1	0.999034	LSTEHSSVS(0.001)EY(0.999)HPADGYAFSSNIYTR	485	Y	2059	EPS8	DFNB102	protein-coding	12p12.3	epidermal growth factor receptor pathway substrate 8 ||| Epidermal growth factor receptor kinase substrate 8	23.0376		23.454	23.1062	23.26	22.5382	22.22	22.0505	22.4377	21.6475	22.1462	21.8933	22.1984		21.542		21.6928	21.1068	23.0376	23.2801	22.8991	22.1353	22.0426	22.0198	22.1984	21.542	21.3998	23.0723	22.0659	21.7134	-1.00639
ph_Q16625:368	Q16625	0	0	0	7.90961e-22	2	-0.78555	1	0.997774	Y(0.998)S(0.002)SGGNFETPSK	368	Y	100506658	OCLN	BLCPMG PPP1R115 PTORCH1	protein-coding	5q13.2	occludin	20.1516	20.1199	20.6975	20.2691	20.5069		19.6147	19.1991	19.6855	19.689	19.5681	19.5869	19.0764	19.1359	19.5614	19.1992	19.468		20.1357	20.4833	20.5069	19.4069	19.6872	19.5775	19.1062	19.3803	19.468	20.3753	19.5572	19.3181	-0.818096
ph_Q99569:465	Q99569	0	0	0	0.0031802	2	0.53983	1	0.860957	STLT(0.139)Y(0.861)QR	465	Y	8502	PKP4	p0071	protein-coding	2q24.1	plakophilin 4 ||| Plakophilin-4	19.5798		19.8556			19.4946	18.8703	18.996	18.7114	18.6106	18.8024	18.4124	18.2391	19.206	18.3999		18.6421	18.7552	19.5798	19.8556	19.4946	18.9331	18.661	18.6074	18.7225	18.3999	18.6987	19.6433	18.7338	18.607	-0.909507
ph_Q9Y446:176	Q9Y446	0	0	0	7.27061e-16	2	-1.7323	1	0.998006	ADY(0.998)DT(0.002)LSLR	176	Y	11187	PKP3	---	protein-coding	11p15.5	plakophilin 3 ||| Plakophilin-3		21.0503	21.2459		20.6147			19.8547	19.8472	19.8528	20.005	19.92	19.8493			19.8016	19.3439		21.0503	21.2459	20.6147	19.8547	19.85	19.9625	19.8493	19.8016	19.3439	20.9703	19.8891	19.6649	-1.08122
ph_P54792:346	P54792	0	0	0	0.00350276	2	-0.10387	1	0.88938	S(0.111)Y(0.889)FTVPR	346	Y	1855	DVL1	DRS2 DVL DVL1L1 DVL1P1	protein-coding	1p36.33	dishevelled segment polarity protein 1 ||| Putative segment polarity protein dishevelled homolog DVL1P1 ||| Segment polarity protein dishevelled homolog DVL-1	18.6783	19.4347	19.2979	19.4595	19.0718	18.9442	18.5057	18.7934	18.4483	18.5498	18.5559	18.8884	18.0064	18.2033			18.182	18.2565	19.0565	19.3787	19.008	18.6495	18.4991	18.7222	18.1049	NA	18.2193	19.1477	18.6236	18.1621	-0.524127
ph_Q7Z698:251	Q7Z698	0	0	0	9.12351e-12	3	0.26847	1	0.778987	GKYPDPSEDADS(0.042)S(0.179)Y(0.779)VR	251	Y	200734	SPRED2	Spred-2	protein-coding	2p14	sprouty related EVH1 domain containing 2 ||| Sprouty-related, EVH1 domain-containing protein 2	21.1886	21.2768	21.6681	21.4107						20.5787	20.3255	20.1403	19.7749	19.8629	19.719	19.7859	20.123	19.6722	21.2327	21.5394	NA	NA	20.5787	20.2329	19.8189	19.7525	19.8976	21.3861	20.4058	19.823	-0.980262
ph_Q99569:494	Q99569	0	0	0	0.00121746	2	0.072516	1	1	VQECNY(1)NR	494	Y	8502	PKP4	p0071	protein-coding	2q24.1	plakophilin 4 ||| Plakophilin-4		21.3121	20.8229	21.4347	20.6972	21.4804				17.1375	19.6995				18.6556		18.5542	17.7494	21.3121	21.1288	21.0888	NA	17.1375	19.6995	NA	18.6556	18.1518	21.1766	18.4185	18.4037	-2.75811
ph_P05783:13	P05783	0	0	0	1.46851e-63	2	0.12146	1	0.999999	STFSTNY(1)R	13	Y	3875	KRT18	CK-18 CYK18 K18	protein-coding	12q13.13	keratin 18 ||| Keratin, type I cytoskeletal 18	22.8911	23.4006	23.7093	23.7783	23.3422	23.5622	22.5109	22.6751	22.416	22.5573	22.6281	22.7641	21.9496	22.2532	22.1848	22.3373	22.5696	22.5796	23.1459	23.7438	23.4522	22.593	22.4867	22.6961	22.1014	22.2611	22.5746	23.4473	22.5919	22.3123	-0.855363
ph_Q99569:372	Q99569	0	0	0	2.18906e-28	3	-0.40078	1	0.999895	TVHDMEQFGQQQYDIY(1)ER	372	Y	8502	PKP4	p0071	protein-coding	2q24.1	plakophilin 4 ||| Plakophilin-4	22.2048	22.5348	22.0853	22.4871	22.0554	21.9049	21.1011	21.124	21.4082	21.1526	20.874	21.1089	21.5068	21.5837	20.8085	20.9904	20.6639		22.3698	22.2862	21.9801	21.1125	21.2804	20.9914	21.5453	20.8995	20.6639	22.212	21.1281	21.0362	-1.08393
ph_P20936:460	P20936	0	0	0	0.00261275	2	-0.028984	1	0.99996	EIY(1)NTIR	460	Y	5921	RASA1	CM-AVM CMAVM CMAVM1 GAP PKWS RASA RASGAP p120 p120GAP p120RASGAP	protein-coding	5q14.3	RAS p21 protein activator 1 ||| Ras GTPase-activating protein 1	20.6033	20.5318	20.8085	20.7967	20.2031			19.7106	19.6683	19.6691	19.1025	19.1783	19.5527	19.8634	19.18	19.3622	18.9094	19.0448	20.5675	20.8026	20.2031	19.7106	19.6687	19.1404	19.708	19.2711	18.9771	20.5244	19.5066	19.3187	-1.01785
ph_Q07157:1066	Q07157	0	0	0	2.45663e-15	2	-0.87124	1	0.747939	Y(0.002)ES(0.035)S(0.035)S(0.144)Y(0.748)T(0.035)DQFS(0.001)R	1066	Y	7082	TJP1	ZO-1	protein-coding	15q13.1	tight junction protein 1 ||| Tight junction protein ZO-1	19.4262	19.7044	20.6645	20.4172	20.1402	19.6787				19.1066	18.9631	19.4183	18.6557			18.598	19.1144	18.7414	19.5653	20.5409	19.9095	NA	19.1066	19.1907	18.6557	18.598	18.9279	20.0052	19.1486	18.7272	-0.856564
ph_Q5R3F8:502	Q5R3F8	0	0	0	0.000600508	2	-2.4899	1	1	GNY(1)IEVR	502	Y	114794	ELFN2	LRRC62 PPP1R29	protein-coding	22q13.1	extracellular leucine rich repeat and fibronectin type III domain containing 2 ||| Protein phosphatase 1 regulatory subunit 29	18.6683	19.3524		19.5443		19.4406	18.2167		18.4461	18.5183	18.6065		18.326		18.3551		18.1334		19.0103	19.5443	19.4406	18.2167	18.4822	18.6065	18.326	18.3551	18.1334	19.3317	18.4351	18.2715	-0.89661
ph_Q9H0W8:41	Q9H0W8	0	0	0	0.0006905	2	1.9079	1	1	ERDY(1)IAPWER	41	Y	56006	SMG9	C19orf61 F17127_1 HBMS	protein-coding	19q13.31	SMG9 nonsense mediated mRNA decay factor ||| Protein SMG9	19.0256		19.6131			19.0646	18.6367	18.7681		18.8053	18.063	18.0503	18.3837			18.0454	17.6816		19.0256	19.6131	19.0646	18.7024	18.8053	18.0567	18.3837	18.0454	17.6816	19.2344	18.5215	18.0369	-0.712979
ph_P00533:1197	P00533	0	0	0	3.34585e-106	2	0.18629	1	1	GSTAENAEY(1)LR	1197	Y	1956	EGFR	ERBB ERBB1 HER1 NISBD2 PIG61 mENA	protein-coding	7p11.2	epidermal growth factor receptor	24.9027	24.706	24.8398	24.5604	24.3545	24.5107	23.695	23.548	23.5357	23.1348	23.441	23.4781	23.9166	23.9061	23.6079	23.434	23.6022	23.6379	24.8044	24.7001	24.4326	23.6215	23.3353	23.4596	23.9113	23.521	23.62	24.6457	23.4721	23.6841	-1.17358
ph_Q8IVF2:4795	Q8IVF2	0	0	0	0.00472975	2	0.054488	1	0.999435	Y(0.999)QVT(0.001)VPR	4795	Y	113146	AHNAK2	C14orf78	protein-coding	14q32.33	AHNAK nucleoprotein 2 ||| Protein AHNAK2	20.0643	20.4158	20.6433			20.4062	19.4947	19.4435		19.9961	19.6011	19.3611	19.4165	19.6148	19.5518	19.4754	19.2575	19.3463	20.24	20.6433	20.4062	19.4691	19.9961	19.4811	19.5157	19.5136	19.3019	20.4298	19.6488	19.4437	-0.781082
ph_Q9Y6M7:44	Q9Y6M7	0	0	0	4.80686e-06	2	0.18609	1	1	AVY(1)IGVHVPFSK	44	Y	9497	SLC4A7	NBC2 NBC3 NBCN1 SBC2 SLC4A6	protein-coding	3p24.1	solute carrier family 4 member 7 ||| Sodium bicarbonate cotransporter 3		19.4283	19.9018	19.9172	19.5312		18.18	18.5311				18.6555	18.7902	18.7612	18.9191	18.1283	18.2811	18.3578	19.4283	19.9095	19.5312	18.3556	NA	18.6555	18.7757	18.5237	18.3194	19.623	18.5055	18.5396	-1.11745
ph_Q13671:36	Q13671	0	0	0	3.40113e-214	3	-0.033456	1	1	EKPAQDPLY(1)DVPNASGGQAGGPQRPGR	36	Y	9610	RIN1	---	protein-coding	11q13.2	Ras and Rab interactor 1	24.4788	24.2198	24.5392	23.9525	24.0331	23.8619	23.5998	23.3364	23.5067	23.2373	23.383	23.3219	23.6135	23.1654	23.3564	23.2775	22.9093	22.8758	24.3493	24.2458	23.9475	23.4681	23.372	23.3524	23.3895	23.3169	22.8925	24.1809	23.3975	23.1997	-0.783367
ph_Q9C0B5;Q9ULC8:711;761	Q9C0B5;Q9ULC8	0	0	0	6.80865e-05	2	-0.29582	1	0.984034	KVS(0.001)GVGGT(0.003)T(0.011)Y(0.984)EIS(0.001)V	711;761	Y	25921 29801	ZDHHC5 ZDHHC8	DHHC5 ZNF375 DHHC8 ZDHHCL1 ZNF378	protein-coding	11q12.1!22q11.21	zinc finger DHHC-type palmitoyltransferase 5 ||| Palmitoyltransferase ZDHHC5 ||| zinc finger DHHC-type palmitoyltransferase 8 ||| Probable palmitoyltransferase ZDHHC8	20.0566		20.338		20.3061		19.5562	19.6868	19.3291		19.3732	19.5605	19.432	19.5845	19.258	19.0487	19.5442	19.4635	20.0566	20.338	20.3061	19.6215	19.3291	19.4668	19.5082	19.1534	19.5038	20.2335	19.4725	19.3885	-0.761033
ph_P63220:53	P63220	0	0	0	0.00312728	2	-0.22375	---	0.871102	T(0.129)Y(0.871)AICGAIR	53	Y	6227	RPS21	HLDF S21	protein-coding	20q13.33	ribosomal protein S21 ||| 40S ribosomal protein S21	18.8674	19.3625	19.3754	19.4549		19.229	18.6319		18.8278	18.6228	18.22			18.1639	18.3523	18.39			19.115	19.4152	19.229	18.6319	18.7253	18.22	18.1639	18.3711	NA	19.2531	18.5258	18.2675	-0.727297
ph_O15357:886	O15357	0	0	0	1.61925e-131	3	-0.16987	1	1	ERLY(1)EWISIDKDEAGAK	886	Y	3636	INPPL1	OPSMD SHIP2	protein-coding	11q13.4	inositol polyphosphate phosphatase like 1 ||| Phosphatidylinositol 3,4,5-trisphosphate 5-phosphatase 2	22.8046	23.2773	23.4177	23.3252	22.6529	22.7196	21.7175	21.794	21.5789	21.5832	21.4948	21.5195	21.9993	21.9701	21.5998	21.778	21.7943	21.6341	23.041	23.3714	22.6862	21.7558	21.581	21.5071	21.9847	21.6889	21.7142	23.0329	21.6147	21.7959	-1.41823
ph_Q99569:478	Q99569	0	0	0	1.84589e-258	3	-0.43469	1	0.976619	NNYALNTTAT(0.023)Y(0.977)AEPYRPIQYR	478	Y	8502	PKP4	p0071	protein-coding	2q24.1	plakophilin 4 ||| Plakophilin-4	24.4394	24.4735		24.1667	24.476		23.867	23.9271	23.8067	23.4778	23.3023	23.48	23.734	23.4915	23.4274	23.422	23.5384	23.3086	24.4565	24.1667	24.476	23.897	23.6422	23.3912	23.6128	23.4247	23.4235	24.3664	23.6435	23.487	-0.722908
ph_Q99569:420	Q99569	0	0	0	1.27791e-08	2	0.48681	1	0.987316	T(0.013)Y(0.987)YSPVYR	420	Y	8502	PKP4	p0071	protein-coding	2q24.1	plakophilin 4 ||| Plakophilin-4	20.76	21.3614	21.3131	21.792	21.2698	21.6075	20.8323	20.8193	20.6862	20.8476	20.4409	20.8309	20.4223	20.3286	20.2885	20.8513		20.4565	21.0607	21.5526	21.4386	20.8258	20.7669	20.6359	20.3755	20.5699	20.4565	21.3506	20.7429	20.4673	-0.607765
ph_Q9HAU0:436	Q9HAU0	0	0	0	8.88965e-25	2	0.16175	1	0.969024	GVIS(0.026)Y(0.969)QT(0.005)LPR	436	Y	54477	PLEKHA5	PEPP-2 PEPP2	protein-coding	12p12.3	pleckstrin homology domain containing A5 ||| Pleckstrin homology domain-containing family A member 5		21.6515	21.6574	21.5132	21.5667	21.5245	19.911		21.2664	21.1528	20.0092			20.7014		19.6765	19.9868	19.823	21.6515	21.5853	21.5456	19.911	21.2096	20.0092	20.7014	19.6765	19.9049	21.5941	20.3766	20.0943	-1.21751
ph_Q6NZI2:156	Q6NZI2	0	0	0	5.10825e-12	2	-0.40774	1	1	VMIY(1)QDEVKLPAK	156	Y	284119	CAVIN1	CAVIN CGL4 FKSG13 PTRF cavin-1	protein-coding	17q21.2	caveolae associated protein 1 ||| Caveolae-associated protein 1	21.3874	21.5499	21.5552	21.3763	22.0571	21.791	21.0355	21.1321	21.0263	20.8625	21.4071	20.8527	20.7644		20.501	20.5928			21.4687	21.4657	21.924	21.0838	20.9444	21.1299	20.7644	20.5469	NA	21.6195	21.0527	20.6557	-0.566766
ph_Q96PD2:750	Q96PD2	0	0	0	1.80514e-67	3	1.0685	1	1	AGKPGLPAPDELVY(1)QVPQSTQEVSGAGR	750	Y	131566	DCBLD2	CLCP1 ESDN	protein-coding	3q12.1|3	discoidin, CUB and LCCL domain containing 2 ||| Discoidin, CUB and LCCL domain-containing protein 2	22.7132	23.0678	23.1427	23.2323	23.2602	23.2833	22.6336	22.7583	22.6378	22.551	22.8904	22.6333	21.835	21.6196	22.134	22.4336	22.5056	22.2567	22.8905	23.1875	23.2718	22.6959	22.5944	22.7618	21.7273	22.2838	22.3812	23.1166	22.6841	22.1308	-0.432521
ph_P54760:574	P54760	0	0	0	1.67368e-23	2	0.45835	1	0.980557	EAEY(0.981)S(0.019)DKHGQYLIGHGTK	574	Y	2050	EPHB4	CMAVM2 HFASD HTK LMPHM7 MYK1 TYRO11	protein-coding	7q22.1	EPH receptor B4 ||| Ephrin type-B receptor 4	24.3937	24.3912	24.7886	24.2626	23.9828	23.7252	23.8586	23.575	23.939	23.3917	23.4869	23.3829	23.5149	23.433	23.4361	23.1204	23.0882		24.3925	24.5256	23.854	23.7168	23.6653	23.4349	23.4739	23.2783	23.0882	24.2573	23.6057	23.2801	-0.651682
ph_Q15464:114	Q15464	0	0	0	7.51824e-84	2	-0.11877	1	1	LDY(1)CGGSGEPGGVQR	114	Y	6461	SHB	bA3J10.2	protein-coding	9p13.1	SH2 domain containing adaptor protein B ||| SH2 domain-containing adapter protein B	22.7217	22.8672	22.8449	22.8092	22.7816	22.5522	22.2732	22.0862	22.2388	22.1587	22.2283	22.006	22.4126	22.1465	22.1631	21.8449	21.9574	21.7819	22.7945	22.827	22.6669	22.1797	22.1987	22.1172	22.2795	22.004	21.8696	22.7628	22.1652	22.0511	-0.597611
ph_Q16625:342	Q16625	0	0	0	0.00281669	2	0.39006	1	0.837157	FYPES(0.03)S(0.133)Y(0.837)K	342	Y	100506658	OCLN	BLCPMG PPP1R115 PTORCH1	protein-coding	5q13.2	occludin	19.1012	19.6843	19.461	19.8816		19.8232	19.2771	19.2322	19.1405	19.3091	18.6607	19.1621	18.6942	18.4103		19.062	18.6216	18.945	19.3928	19.6713	19.8232	19.2546	19.2248	18.9114	18.5522	19.062	18.7833	19.6291	19.1303	18.7992	-0.49882
ph_Q96PD2:715	Q96PD2	0	0	0	3.1517e-31	3	0.68387	1	0.949298	ATGNQPPPLVGT(0.041)Y(0.949)NT(0.01)LLSR	715	Y	131566	DCBLD2	CLCP1 ESDN	protein-coding	3q12.1|3	discoidin, CUB and LCCL domain containing 2 ||| Discoidin, CUB and LCCL domain-containing protein 2	19.6128	19.5008	19.6462	20.0255			19.2912	19.4729	19.0181			19.5007	17.9743	19.1185	18.7977		19.0356	18.9931	19.5568	19.8359	NA	19.382	19.0181	19.5007	18.5464	18.7977	19.0144	19.6963	19.3003	18.7861	-0.396048
ph_O15049:83	O15049	0	0	0	1.82116e-05	2	0.59536	1	0.941076	NEPADY(0.941)AT(0.05)LY(0.007)Y(0.001)R	83	Y	23138	N4BP3	LZTS4	protein-coding	5q35.3	NEDD4 binding protein 3 ||| NEDD4-binding protein 3		18.8827		19.1673	18.958	18.6417	18.3603	18.4542	18.2097	18.0972	17.7625	18.2976	18.415	18.2345	17.8481	18.0442	18.0892	18.3944	18.8827	19.1673	18.7998	18.4072	18.1535	18.03	18.3248	17.9461	18.2418	18.9499	18.1969	18.1709	-0.753024
ph_P58335:381	P58335	0	0	0	9.57177e-06	2	0.33436	1	0.842266	WPTVDAS(0.027)Y(0.131)Y(0.842)GGR	381	Y	84168 118429	ANTXR1 ANTXR2	ATR GAPO TEM8 CMG-2 CMG2 HFS ISH JHF	protein-coding	2p13.3!4q21.21	ANTXR cell adhesion molecule 1 ||| Anthrax toxin receptor 1 ||| ANTXR cell adhesion molecule 2 ||| Anthrax toxin receptor 2	19.5489		19.6513	19.857	19.9995				19.4227	19.3415	19.0378		19.1746	18.3869			18.9958	18.8243	19.5489	19.7542	19.9995	NA	19.3821	19.0378	18.7808	NA	18.9101	19.7675	19.21	18.8454	-0.557559
ph_Q96CS3:79	Q96CS3	0	0	0	1.60323e-53	2	0.37873	1	0.999969	IY(1)SYVVSRPQPR	79	Y	23197	FAF2	ETEA UBXD8 UBXN3B	protein-coding	5q35.2	Fas associated factor family member 2 ||| FAS-associated factor 2	21.086	21.1415	21.3466	20.7548	20.9133	20.8247	20.3377		20.6412	20.1955	20.5308	20.1082	20.2707	20.3563	20.358	20.3204	20.313		21.1137	21.0507	20.869	20.3377	20.4184	20.3195	20.3135	20.3392	20.313	21.0111	20.3585	20.3219	-0.652607
ph_O14786:920	O14786	0	0	0	1.28345e-05	2	-0.2265	1	0.845268	DKLNT(0.001)QS(0.004)T(0.004)Y(0.845)S(0.146)EA	920	Y	8829	NRP1	BDCA4 CD304 NP1 NRP VEGF165R	protein-coding	10p11.22	neuropilin 1 ||| Neuropilin-1	21.2297		21.37			21.3993	20.8797	20.501	20.8315	21.5961	20.9683	20.7676	20.3124	20.3378	21.144	20.3868		20.4009	21.2297	21.37	21.3993	20.6903	21.2138	20.868	20.3251	20.7654	20.4009	21.333	20.924	20.4971	-0.408979
ph_Q9C0H5:448	Q9C0H5	0	0	0	2.41217e-08	2	0.23156	1	0.998982	S(0.001)GDY(0.999)STMEGPELR	448	Y	80728	ARHGAP39	CrGAP Vilse	protein-coding	8q24.3	Rho GTPase activating protein 39 ||| Rho GTPase-activating protein 39	20.175	20.4263	20.3358	20.0464	20.3001	20.2663	19.8337	19.6399	20.0979	19.8089	19.3461		19.6245		19.3196		19.3889		20.3007	20.1911	20.2832	19.7368	19.9534	19.3461	19.6245	19.3196	19.3889	20.2583	19.6788	19.4443	-0.579548
ph_Q9UQB8:337	Q9UQB8	0	0	0	0.000337349	2	-2.9115	---	0.814584	LS(0.008)DS(0.083)Y(0.815)S(0.083)NT(0.012)LPVRK	337	Y	10458	BAIAP2	BAP2 FLAF3 IRSP53	protein-coding	17q25.3	BAR/IMD domain containing adaptor protein 2 ||| Brain-specific angiogenesis inhibitor 1-associated protein 2	20.5225	20.4967	21.0684	20.5632		19.9981	19.4154		19.9426	19.1897	19.6154	19.0224	19.4347	19.3571	19.5281	19.1025	19.4883	19.4528	20.5096	20.8158	19.9981	19.4154	19.5662	19.3189	19.3959	19.3153	19.4706	20.4411	19.4335	19.3939	-1.00765
ph_Q9NRY4:1105	Q9NRY4	0	0	0	7.33122e-112	3	-0.042644	1	0.983297	NEEENIY(0.983)S(0.017)VPHDSTQGK	1105	Y	2909	ARHGAP35	GRF-1 GRLF1 P190-A P190A p190ARhoGAP p190RhoGAP	protein-coding	19q13.32	Rho GTPase activating protein 35 ||| Rho GTPase-activating protein 35	24.6227	24.6712	24.5768	24.713	24.3943	24.3258	24.4039	24.0624	24.0936	24.1364	24.2504	24.2848	23.9673	24.0401	23.8242	23.9189	24.0756	23.8316	24.6469	24.6449	24.3601	24.2332	24.115	24.2676	24.0037	23.8715	23.9536	24.5506	24.2053	23.9429	-0.345379
ph_Q99959:108	Q99959	0	0	0	1.62814e-05	2	-0.22259	1	0.971102	SPVPKT(0.029)Y(0.971)DMLK	108	Y	5318	PKP2	ARVD9	protein-coding	12p11.21	plakophilin 2 ||| Plakophilin-2	20.8146		21.1539	21.2462	20.7269			20.0166		19.6556		19.3643	20.0743	20.3985		19.0888	20.331		20.8146	21.2001	20.7269	20.0166	19.6556	19.3643	20.2364	19.0888	20.331	20.9139	19.6788	19.8854	-1.23503
ph_P53801:174	P53801	0	0	0	9.94992e-193	2	0.30556	1;2	1	Y(1)GLFKEENPY(1)AR	174	Y	754	PTTG1IP	C21orf1 C21orf3 PBF	protein-coding	21q22.3	PTTG1 interacting protein ||| Pituitary tumor-transforming gene 1 protein-interacting protein	25.1898	25.2447	25.3617	24.5369	25.5398	25.4171	24.3285	24.3714	24.5246	24.5397	24.4155	24.2894	24.7174	24.366	24.3197	24.4296	24.3454	24.5177	25.2173	24.9493	25.4784	24.35	24.5321	24.3525	24.5417	24.3746	24.4316	25.215	24.4115	24.4493	-0.80348
ph_Q9GZY6:40	Q9GZY6	0	0	0	0.000937479	2	0.12218	1	1	SEKIY(1)QQR	40	Y	7462	LAT2	HSPC046 LAB NTAL WBSCR15 WBSCR5 WSCR5	protein-coding	7q11.23	linker for activation of T cells family member 2 ||| Linker for activation of T-cells family member 2	20.904		21.0213	21.2778	20.9652	20.7614	20.1137		19.8745	19.7274	20.0155	19.7621	20.7186	20.7743	20.3258	19.828	19.9612	20.1431	20.904	21.1495	20.8633	20.1137	19.801	19.8888	20.7465	20.0769	20.0521	20.9723	19.9345	20.2918	-1.0378
ph_Q9HAU0:866	Q9HAU0	0	0	0	1.85061e-26	3	0.71101	2	0.949973	AKS(0.651)PT(0.215)PES(0.045)S(0.045)T(0.045)IAS(0.039)Y(0.95)VT(0.011)LRK	866	Y	54477	PLEKHA5	PEPP-2 PEPP2	protein-coding	12p12.3	pleckstrin homology domain containing A5 ||| Pleckstrin homology domain-containing family A member 5	21.1021		21.3761	21.3603	21.1853	21.3975		20.311				19.4469	20.1192		20.2918	20.2932		20.553	21.1021	21.3682	21.2914	20.311	NA	19.4469	20.1192	20.2925	20.553	21.2539	19.879	20.3216	-1.37492
ph_Q9Y624:280	Q9Y624	0	0	0	0.00118476	2	0.59825	1	0.974301	VIY(0.974)S(0.025)QPS(0.001)AR	280	Y	50848	F11R	CD321 JAM JAM1 JAMA JCAM KAT PAM-1	protein-coding	1q23.3	F11 receptor ||| Junctional adhesion molecule A	20.1855		20.2817		20.4318	20.4013	19.8681	20.4077	19.5475		19.5737			19.3206	19.7778	19.87	20.026	19.3565	20.1855	20.2817	20.4166	20.1379	19.5475	19.5737	19.3206	19.8239	19.6912	20.2946	19.753	19.6119	-0.541521
ph_Q8IZP0:213	Q8IZP0	0	0	0	2.81817e-191	3	0.024132	1;2	0.960901	TLEPVKPPTVPNDY(0.961)MT(0.029)S(0.01)PAR	213	Y	10006	ABI1	ABI-1 ABLBP4 E3B1 NAP1BP SSH3BP SSH3BP1	protein-coding	10p12.1	abl interactor 1	24.6064	24.8507	24.7225	24.6232	24.757	24.3429	23.6745	23.8871	24.2602	24.0732	23.9073	24.137	24.295	24.434	23.9127	24.0164	23.7782	23.8549	24.7285	24.6728	24.5499	23.7808	24.1667	24.0221	24.3645	23.9646	23.8166	24.6504	23.9899	24.0486	-0.660551
ph_Q6NZI2:308	Q6NZI2	0	0	0	2.86838e-30	2	0.078758	1	1	SFTPDHVVY(1)AR	308	Y	284119	CAVIN1	CAVIN CGL4 FKSG13 PTRF cavin-1	protein-coding	17q21.2	caveolae associated protein 1 ||| Caveolae-associated protein 1	23.2333	23.3659	23.3759	23.018	23.6509	23.6853	22.5334	22.3503	22.3584	22.3089	22.5895	22.2423	22.7684	22.5408	22.6968	22.69	22.6966	22.4682	23.2996	23.197	23.6681	22.4418	22.3337	22.4159	22.6546	22.6934	22.5824	23.3882	22.3971	22.6435	-0.99109
ph_Q96J84:644	Q96J84	0	0	0	1.89291e-68	2	0.61045	1	0.96287	LS(0.003)HS(0.963)S(0.028)GY(0.006)AQLNTYSR	644	S	55243	KIRREL1	KIRREL NEPH1	protein-coding	1q23.1	kirre like nephrin family adhesion molecule 1 ||| Kin of IRRE-like protein 1			22.3496		22.3947	22.2046		20.3522	22.0055	21.5389	22.1141		21.749		21.6202				NA	22.3496	22.2997	20.3522	21.7722	22.1141	21.749	21.6202	NA	22.3246	21.4129	21.6846	-0.911773
ph_Q99569:415	Q99569	0	0	0	8.21255e-34	2	0.078217	1	0.998587	SAVSPDLHIT(0.001)PIY(0.999)EGR	415	Y	8502	PKP4	p0071	protein-coding	2q24.1	plakophilin 4 ||| Plakophilin-4	21.5049	21.8656	21.6448	21.5982	21.3304	21.1232	20.7691		21.292	20.7964	20.583	20.8131	21.5837	21.1604	20.9851	21.2201		20.6528	21.6853	21.6215	21.2268	20.7691	21.0442	20.698	21.372	21.1026	20.6528	21.5112	20.8371	21.0425	-0.674066
ph_Q05655:313	Q05655	0	0	0	6.23788e-106	3	-0.14698	1;2	1	RSDSASSEPVGIY(1)QGFEKK	313	Y	5580	PRKCD	ALPS3 CVID9 MAY1 PKCD nPKC-delta	protein-coding	3p21.1	protein kinase C delta ||| Protein kinase C delta type	23.2968	23.1448	23.1354	22.5975	23.0304	22.5048	22.3977	22.2873	22.6748	22.0972	22.4681	22.0621	22.7373	22.5414	22.4953	22.3527	22.3739	22.3798	23.2208	22.8664	22.7676	22.3425	22.386	22.2651	22.6393	22.424	22.3768	22.9516	22.3312	22.4801	-0.620402
ph_P07948:32	P07948	0	0	0	4.49198e-27	2	-4.4115	1	0.99984	TIY(1)VRDPTSNK	32	Y	4067	LYN	JTK8 p53Lyn p56Lyn	protein-coding	8q12.1	LYN proto-oncogene, Src family tyrosine kinase ||| Tyrosine-protein kinase Lyn			21.1903	21.2179		21.2916	20.53	20.4985	20.4909		20.435	20.6565	21.3857	20.6459	20.5366	21.5492		20.7357	NA	21.2041	21.2916	20.5142	20.4909	20.5458	21.0158	21.0429	20.7357	21.2479	20.517	20.9315	-0.730882
ph_P38159:335	P38159	0	0	0	0.000527827	2	-0.18834	1	0.993962	SDLY(0.994)S(0.005)S(0.001)GRDR	335	Y	27316	RBMX	HNRNPG HNRPG MRXS11 RBMXP1 RBMXRT RNMX hnRNP-G	protein-coding	Xq26.3	RNA binding motif protein X-linked ||| RNA-binding motif protein, X chromosome	20.5276		20.5223				19.8754				19.9795	19.9012				20.5675		20.1058	20.5276	20.5223	NA	19.8754	NA	19.9404	NA	20.5675	20.1058	20.525	19.9079	20.3367	-0.617078
ph_Q07666:440	Q07666	0	0	0	0.000324259	2	0.95175	1	0.998536	EHPY(0.999)GRY(0.001)	440	Y	10657 202559	KHDRBS1 KHDRBS2	Sam68 p62 p68 SLM-1 SLM1	protein-coding	1p35.2!6q11.1	KH RNA binding domain containing, signal transduction associated 1 ||| KH domain-containing, RNA-binding, signal transduction-associated protein 1 ||| KH RNA binding domain containing, signal transduction associated 2 ||| KH domain-containing, RNA-binding, signal transduction-associated protein 2	21.441	21.7073	21.698		21.5452	21.7943	21.8972	22.2332	22.1023	22.0795	22.3022	22.2795	22.2086	22.522	22.7251	22.8463	22.7923	22.7127	21.5741	21.698	21.6697	22.0652	22.0909	22.2909	22.3653	22.7857	22.7525	21.6473	22.149	22.6345	0.501717
ph_Q13523:849	Q13523	0	0	0	0	2	-0.49655	1;2	0.999928	LCDFGSASHVADNDITPY(1)LVSR	849	Y	8899	PRPF4B	PR4H PRP4 PRP4H PRP4K dJ1013A10.1	protein-coding	6p25.2	pre-mRNA processing factor 4B ||| Serine/threonine-protein kinase PRP4 homolog	28.0803	28.8725	28.4173	28.3137	28.7976	28.6562	28.9655	29.3718	28.7366	28.9382	29.1701	29.0601	29.417	29.1543	29.4062		29.541	29.4671	28.4764	28.3655	28.7269	29.1686	28.8374	29.1151	29.2857	29.4062	29.504	28.5229	29.0404	29.3986	0.51746
ph_P35232:249	P35232	0	0	0	0.000113133	2	0.3336	1	0.927717	KLEAAEDIAY(0.928)QLS(0.072)R	249	Y	5245	PHB	HEL-215 HEL-S-54e PHB1	protein-coding	17q21.33	prohibitin	17.803	18.5633	18.1437	18.2821		18.5652		19.1805	18.756	18.7855	18.5999	19.1074	19.3457	19.2595			19.1131	19.1411	18.1832	18.2129	18.5652	19.1805	18.7708	18.8537	19.3026	NA	19.1271	18.3204	18.935	19.2148	0.614563
ph_P07947:194	P07947	0	0	0	2.64173e-08	3	-0.68157	1	0.952322	ESET(0.001)T(0.001)KGAY(0.952)S(0.043)LS(0.003)IR	194	Y	2268 2534 7525	FGR FYN YES1	SRC2 c-fgr c-src2 p55-Fgr p55c-fgr p58-Fgr p58c-fgr SLK SYN p59-FYN HsT441 P61-YES Yes c-yes	protein-coding	1p35.3!6q21!18p11.32	FGR proto-oncogene, Src family tyrosine kinase ||| Tyrosine-protein kinase Fgr ||| FYN proto-oncogene, Src family tyrosine kinase ||| Tyrosine-protein kinase Fyn ||| YES proto-oncogene 1, Src family tyrosine kinase ||| Tyrosine-protein kinase Yes		20.2577	20.5431	20.0639			20.9393		20.9455	20.7732			21.2383		21.1437			20.9207	20.2577	20.3035	NA	20.9393	20.8593	NA	21.2383	21.1437	20.9207	20.2806	20.8993	21.1009	0.618757
ph_Q05639;Q5VTE0:141;141	Q5VTE0;Q05639	0	0	0	3.86251e-68	2	-0.53418	1	0.998216	EHALLAY(0.998)T(0.002)LGVK	141;141	Y	1915 1917 158078	EEF1A1 EEF1A2 EEF1A1P5	CCS-3 CCS3 EE1A1 EEF-1 EEF1A EF-Tu EF1A GRAF-1EF HNGC:16303 LENG7 PTI1 eEF1A-1 EEF1AL EF-1-alpha-2 EIEE33 HS1 MRD38 STN STNL EEF1AL3	protein-coding|pseudo	6q13!20q13.33!9q34.13	eukaryotic translation elongation factor 1 alpha 1 ||| Elongation factor 1-alpha 1 ||| eukaryotic translation elongation factor 1 alpha 2 ||| Elongation factor 1-alpha 2 ||| eukaryotic translation elongation factor 1 alpha 1 pseudogene 5 ||| Putative elongation factor 1-alpha-like 3	21.1759	21.5086	20.9719	21.3295	21.1032	21.0706	21.4399	21.6605	21.4678	21.6905	21.5231	21.6821	21.8581	21.7486	22.0601	22.1654	21.892	21.865	21.3423	21.1507	21.0869	21.5502	21.5792	21.6026	21.8033	22.1128	21.8785	21.1933	21.5773	21.9315	0.384046
ph_O75815:266	O75815	0	0	0	2.96266e-09	2	-0.41099	1	0.986572	CLEEHY(0.987)GT(0.011)S(0.003)PGQAR	266	Y	8412	BCAR3	AND-34 NSP2 SH2D3B	protein-coding	1p22.1	BCAR3 adaptor protein, NSP family member ||| Breast cancer anti-estrogen resistance protein 3	19.8736	20.1088		19.7956	20.4227	20.0043	20.4596	19.9983	20.5333	20.2238	20.5097		20.9005	20.8165	21.0205	20.6333	20.9364	20.6863	19.9912	19.7956	20.2135	20.2289	20.3785	20.5097	20.8585	20.8269	20.8113	20.0001	20.3724	20.8322	0.37228
ph_Q05397:576	Q05397	0	0	0	9.68429e-84	3	0.23548	1;2	0.982771	YMEDST(0.002)Y(0.983)Y(0.015)KASK	576	Y	5747	PTK2	FADK FAK FAK1 FRNK PPP1R71 p125FAK pp125FAK	protein-coding	8q24.3	protein tyrosine kinase 2 ||| Focal adhesion kinase 1	24.3709	24.4803	24.5519	24.6235	24.9155	24.7321	25.0345	24.9111	24.9812	24.9915	25.303	25.211	25.2554	25.3402	25.5247	25.4578	25.389	25.333	24.4256	24.5877	24.8238	24.9728	24.9863	25.257	25.2978	25.4912	25.361	24.6124	25.072	25.3833	0.459672
ph_P07948:194	P07948	0	0	0	3.40747e-22	2	-0.4549	1	0.981948	SLDNGGY(0.015)Y(0.982)IS(0.004)PR	194	Y	4067	LYN	JTK8 p53Lyn p56Lyn	protein-coding	8q12.1	LYN proto-oncogene, Src family tyrosine kinase ||| Tyrosine-protein kinase Lyn	21.4959		21.467	21.4795		21.9805	22.5622	22.6794	22.3191	22.3213	22.4667	22.3994	22.6708	22.6096	22.4196	22.8416	22.45	22.5356	21.4959	21.4732	21.9805	22.6208	22.3202	22.433	22.6402	22.6306	22.4928	21.6499	22.458	22.5878	0.808113
ph_P45984:185	P45984	0	0	0	8.91131e-06	2	0.013871	1	0.628376	TACTNFMMT(0.186)PY(0.628)VVT(0.186)R	185	Y	5601	MAPK9	JNK-55 JNK2 JNK2A JNK2ALPHA JNK2B JNK2BETA PRKM9 SAPK SAPK1a p54a p54aSAPK	protein-coding	5q35.3	mitogen-activated protein kinase 9			17.8111		17.9078		18.3813	18.4702		18.4583	17.8902	18.4306		18.8165			18.5757	18.6678	NA	17.8111	17.9078	18.4258	18.4583	18.1604	18.8165	NA	18.6218	17.8594	18.3481	18.7191	0.488697
ph_P07948:193	P07948	0	0	0	3.40747e-22	2	0.25988	1	0.849748	SLDNGGY(0.85)Y(0.15)IS(0.001)PR	193	Y	4067	LYN	JTK8 p53Lyn p56Lyn	protein-coding	8q12.1	LYN proto-oncogene, Src family tyrosine kinase ||| Tyrosine-protein kinase Lyn		19.3358	19.1016	18.8147			20.007	20.4279	19.4785		19.9095	20.5647	20.1384			20.5129			19.3358	18.9581	NA	20.2175	19.4785	20.2371	20.1384	20.5129	NA	19.147	19.9777	20.3257	0.830691
ph_Q86X29:523	Q86X29	0	0	0	0.00506284	2	3.3673	1	0.980853	S(0.019)RAY(0.981)MPPR	523	Y	51599	LSR	ILDR3 LISCH7	protein-coding	19q13.12	lipolysis stimulated lipoprotein receptor ||| Lipolysis-stimulated lipoprotein receptor	18.2034	18.4709	18.4529	18.6737		19.0166	19.7351	19.5958	19.4206	19.1839	19.4261	19.7396	19.1651	19.4482		20.8303		19.4967	18.3372	18.5633	19.0166	19.6654	19.3022	19.5829	19.3067	20.8303	19.4967	18.639	19.5168	19.8779	0.877824
ph_Q9UPZ9:157	Q9UPZ9	0	0	0	2.30958e-05	2	1.2517	2	0.971181	S(0.005)KPPY(0.033)T(0.971)DY(0.962)VS(0.023)T(0.006)R	157	T	22858	CILK1	ECO EJM10 ICK LCK2 MRK hICK	protein-coding	6p12.1	ciliogenesis associated kinase 1 ||| Serine/threonine-protein kinase ICK	20.2795	20.1395	20.1753	20.0677	20.3034	20.1747	20.5388	20.2907	20.7546	20.4867			21.0154	20.7183	21.0782	20.8201			20.2095	20.1215	20.2391	20.4147	20.6206	NA	20.8669	20.9491	NA	20.19	20.5177	20.908	0.327685
ph_Q9UPZ9:159	Q9UPZ9	0	0	0	2.30958e-05	2	1.2517	2	0.961934	S(0.005)KPPY(0.033)T(0.971)DY(0.962)VS(0.023)T(0.006)R	159	Y	22858	CILK1	ECO EJM10 ICK LCK2 MRK hICK	protein-coding	6p12.1	ciliogenesis associated kinase 1 ||| Serine/threonine-protein kinase ICK	20.2795	20.1395	20.1753	20.0677	20.3034	20.1747	20.5388	20.2907	20.7546	20.4867			21.0154	20.7183	21.0782	20.8201			20.2095	20.1215	20.2391	20.4147	20.6206	NA	20.8669	20.9491	NA	20.19	20.5177	20.908	0.327685
ph_P18206:822	P18206	0	0	0	3.88353e-50	2	0.24305	1	0.999971	SFLDSGY(1)R	822	Y	7414	VCL	CMD1W CMH15 HEL114 MV MVCL	protein-coding	10q22.2	vinculin	20.834	21.2571	21.1043	21.0688	21.4013	21.3804	21.6336	21.713	21.671	21.7991	21.7591	22.1017	21.5741	21.8976	21.7231	22.088	21.847	22.018	21.0456	21.0865	21.3908	21.6733	21.735	21.9304	21.7358	21.9056	21.9325	21.1743	21.7796	21.858	0.60528
ph_Q14247:446	Q14247	0	0	0	2.04385e-46	3	-0.31468	1	0.931939	AELSYRGPVSGTEPEPVY(0.932)S(0.068)MEAADYR	446	Y	2017	CTTN	EMS1	protein-coding	11q13.3	cortactin ||| Src substrate cortactin	21.0966	21.4899	21.1093	21.1242	21.3553	21.4398	21.7274	21.6978	21.4284	21.177	21.6032	21.5086	21.8894	21.6607	22.1206	21.7441	22.0566	22.1233	21.2932	21.1167	21.3975	21.7126	21.3027	21.5559	21.775	21.9323	22.09	21.2692	21.5237	21.9324	0.254578
ph_P46109:251	P46109	0	0	0	0.00253342	2	-0.16732	1	1	RVPCAY(1)DK	251	Y	1399	CRKL	---	protein-coding	22q11.21	CRK like proto-oncogene, adaptor protein ||| Crk-like protein	19.6059		19.7135		19.2757	19.2226	19.651		19.6569		19.9665		20.18		20.3569				19.6059	19.7135	19.2491	19.651	19.6569	19.9665	20.18	20.3569	NA	19.5229	19.7581	20.2684	0.235274
ph_Q71UM5:31	Q71UM5	0	0	0	9.51945e-08	2	-0.89743	1	0.79906	LVQSPNS(0.201)Y(0.799)FMDVK	31	Y	6232 51065	RPS27 RPS27L	DBA17 MPS-1 MPS1 S27	protein-coding	1q21.3!15q22.2	ribosomal protein S27 ||| 40S ribosomal protein S27 ||| ribosomal protein S27 like ||| 40S ribosomal protein S27-like		20.3007	20.0943			20.5357			20.5883	20.6511	20.6584	21.1874			21.2111	21.2694		21.0248	20.3007	20.0943	20.5357	NA	20.6197	20.9229	NA	21.2402	21.0248	20.3102	20.7713	21.1325	0.461075
ph_Q13164:221	Q13164	0	0	0	2.27365e-37	3	-0.27438	1	0.981024	GLCTSPAEHQYFMT(0.008)EY(0.981)VAT(0.011)R	221	Y	5598	MAPK7	BMK1 ERK4 ERK5 PRKM7	protein-coding	17p11.2	mitogen-activated protein kinase 7	21.5187	21.869	21.2194	21.5632	21.7974	21.5794	21.8062	21.7455	21.745	21.5367	21.4157	21.6848	22.3257	22.3306	22.3581	22.1976	22.0416	22.0549	21.6939	21.3913	21.6884	21.7759	21.6408	21.5502	22.3281	22.2778	22.0483	21.5912	21.6556	22.2181	0.0644448
ph_Q9C0B5:630	Q9C0B5	0	0	0	5.67807e-15	2	-0.37802	1	0.99801	GVGSPEPGPT(0.002)APY(0.998)LGR	630	Y	25921	ZDHHC5	DHHC5 ZNF375	protein-coding	11q12.1	zinc finger DHHC-type palmitoyltransferase 5 ||| Palmitoyltransferase ZDHHC5	20.7265	21.1452	21.0379	20.9261	21.0654	21.0961	21.2204	21.175	21.2048	21.2991	21.7561	21.3635	21.648	21.8252	21.4372	21.515	22.1142	21.741	20.9359	20.982	21.0807	21.1977	21.252	21.5598	21.7366	21.4761	21.9276	20.9995	21.3365	21.7134	0.33696
ph_P07355:316	P07355	0	0	0	3.75774e-06	2	0.50828	1	0.993412	S(0.003)LY(0.993)Y(0.003)Y(0.001)IQQDTK	316	Y	302 304	ANXA2 ANXA2P2	ANX2 ANX2L4 CAL1H HEL-S-270 LIP2 LPC2 LPC2D P36 PAP-IV ANX2L2 ANX2P2 LPC2B	protein-coding|pseudo	15q22.2!9p13.3	annexin A2 ||| annexin A2 pseudogene 2 ||| Putative annexin A2-like protein	18.8844		18.7556	18.9866	19.4454		19.5755	19.4652	19.5774	19.3481	19.7529	19.7538			19.8949	20.0382	19.7623	19.7825	18.8844	18.8711	19.4454	19.5203	19.4627	19.7533	NA	19.9665	19.7724	19.067	19.5788	19.8695	0.511828
ph_P27361:204	P27361	0	0	0	5.15008e-303	3	-0.32493	1;2	0.998017	IADPEHDHTGFLTEY(0.998)VAT(0.001)R	204	Y	5595	MAPK3	ERK-1 ERK1 ERT2 HS44KDAP HUMKER1A P44ERK1 P44MAPK PRKM3 p44-ERK1 p44-MAPK	protein-coding	16p11.2	mitogen-activated protein kinase 3	25.0408	25.3995	25.0115	24.8957	25.0416	24.7226	25.1899	25.3172	24.9979	24.709	25.248	25.1841	25.8461	25.5881	25.5666	25.6932	25.6665	25.5829	25.2202	24.9536	24.8821	25.2536	24.8535	25.2161	25.7171	25.6299	25.6247	25.0186	25.1077	25.6572	0.0890624
ph_Q9Y490:70	Q9Y490	0	0	0	0.00339792	2	0.2027	1	0.882271	ALDY(0.882)Y(0.118)MLR	70	Y	7094	TLN1	ILWEQ TLN talin-1	protein-coding	9p13.3	talin 1 ||| Talin-1			18.2076	18.6038	18.3332	18.8709	18.7242	18.9406			18.5318	19.1538		18.952	19.1549	19.386		19.1466	NA	18.4057	18.602	18.8324	NA	18.8428	18.952	19.2705	19.1466	18.5038	18.8376	19.123	0.333758
ph_P40189:905	P40189	0	0	0	2.0323e-38	2	-0.25329	1	0.988601	S(0.011)Y(0.989)LPQTVR	905	Y	3572	IL6ST	CD130 CDW130 GP130 HIES4 IL-6RB sGP130	protein-coding	5q11.2	interleukin 6 signal transducer ||| Interleukin-6 receptor subunit beta	23.1393	23.4067	23.409	23.5389	23.6304	23.7633	23.96	24.0411	23.9039	24.1827	24.0278	24.1297	23.8972	24.1777	24.0776	24.1125	24.1193	24.0967	23.273	23.4739	23.6968	24.0006	24.0433	24.0788	24.0374	24.0951	24.108	23.4813	24.0409	24.0802	0.559622
ph_P16591:714	P16591	0	0	0	1.26683e-05	2	-2.9634	---	0.751329	QEDGGVY(0.751)S(0.197)S(0.042)S(0.009)GLK	714	Y	2241	FER	PPP1R74 TYK3 p94-Fer	protein-coding	5q21.3	FER tyrosine kinase ||| Tyrosine-protein kinase Fer		20.5813		21.004	20.4306					21.7105	20.9781	20.8895	21.4252	21.3787			21.5313		20.5813	21.004	20.4306	NA	21.7105	20.9338	21.402	NA	21.5313	20.672	21.3222	21.4666	0.650213
ph_P08559:300	P08559	0	0	0	4.1034e-06	2	-0.44201	1	0.548791	YHGHS(0.003)MS(0.003)DPGVS(0.549)Y(0.445)R	300	S	5160 5161	PDHA1 PDHA2	PDHA PDHAD PDHCE1A PHE1A PDHAL	protein-coding	Xp22.12!4q22.3	pyruvate dehydrogenase E1 subunit alpha 1 ||| Pyruvate dehydrogenase E1 component subunit alpha, somatic form, mitochondrial ||| pyruvate dehydrogenase E1 subunit alpha 2 ||| Pyruvate dehydrogenase E1 component subunit alpha, testis-specific form, mitochondrial	17.5672	17.9057	18.4614	17.9383	18.3697	18.6776		18.9786	19.9545	19.5658		19.0419	19.0977	18.749	19.111	18.9726	18.776	18.5926	17.7365	18.1998	18.5237	18.9786	19.7602	19.0419	18.9233	19.0418	18.6843	18.1533	19.2602	18.8831	1.10689
ph_P08559:301	P08559	0	0	0	0.000157061	3	1.0564	1	0.764027	YHGHSMS(0.001)DPGVS(0.235)Y(0.764)R	301	Y	5160 5161	PDHA1 PDHA2	PDHA PDHAD PDHCE1A PHE1A PDHAL	protein-coding	Xp22.12!4q22.3	pyruvate dehydrogenase E1 subunit alpha 1 ||| Pyruvate dehydrogenase E1 component subunit alpha, somatic form, mitochondrial ||| pyruvate dehydrogenase E1 subunit alpha 2 ||| Pyruvate dehydrogenase E1 component subunit alpha, testis-specific form, mitochondrial	19.1051	20.0588	18.7862	19.2544	19.3005	19.2553	20.3262		20.4952	20.2884	19.8468		19.3128	20.0164	19.7025	19.7708	19.4701	19.6429	19.582	19.0203	19.2779	20.3262	20.3918	19.8468	19.6646	19.7367	19.5565	19.2934	20.1883	19.6526	0.894893
ph_Q06418:681	Q06418	0	0	0	1.56132e-68	2	1.1291	1;2	0.999954	KIY(1)SGDYYR	681	Y	10461 7301	MERTK TYRO3	MER RP38 Tyro12 c-Eyk c-mer BYK Dtk Etk-2 RSE Rek Sky Tif	protein-coding	2q13!15q15.1	MER proto-oncogene, tyrosine kinase ||| Tyrosine-protein kinase Mer ||| TYRO3 protein tyrosine kinase ||| Tyrosine-protein kinase receptor TYRO3	23.1014	23.5475	23.7228	23.5298	23.7851	23.7083	19.4365	19.3873	19.5632	19.5262	18.9878	19.1393		18.5726					23.3245	23.6263	23.7467	19.4119	19.5447	19.0635	18.5726	NA	NA	23.5658	19.3401	18.5726	-4.22575
ph_P01130:845	P01130	0	0	0	1.06379e-36	3	-0.42469	1	0.76223	TTEDEVHICHNQDGY(0.762)S(0.201)Y(0.035)PS(0.001)R	845	Y	3949	LDLR	FH FHC FHCL1 LDLCQ2	protein-coding	19p13.2	low density lipoprotein receptor ||| Low-density lipoprotein receptor	22.808	22.9218	23.297	23.2336	23.3036	23.1764			22.3582					20.3776			20.6656	20.6704	22.8649	23.2653	23.24	NA	22.3582	NA	20.3776	NA	20.668	23.1234	22.3582	20.5228	-0.765142
ph_Q9C0B5:456	Q9C0B5	0	0	0	6.50048e-23	2	0.10832	1	0.754242	SEGTTST(0.006)S(0.198)Y(0.754)KS(0.042)LANQTR	456	Y	25921	ZDHHC5	DHHC5 ZNF375	protein-coding	11q12.1	zinc finger DHHC-type palmitoyltransferase 5 ||| Palmitoyltransferase ZDHHC5		20.7119	20.6695	20.326	20.2965	19.8875	18.9815	18.1972	17.9934		17.9604		17.8917						20.7119	20.4977	20.092	18.5894	17.9934	17.9604	17.8917	NA	NA	20.4339	18.1811	17.8917	-2.25283
ph_Q13480:259	Q13480	0	0	0	1.52784e-16	2	1.1271	1	0.966219	APSASVDS(0.006)S(0.028)LY(0.966)NLPR	259	Y	2549	GAB1	DFNB26	protein-coding	4q31.21	GRB2 associated binding protein 1 ||| GRB2-associated-binding protein 1	18.8988	19.1216	19.3778	19.4304	19.3028		17.5181	17.2205		17.8197	17.358	17.5761							19.0102	19.4041	19.3028	17.3693	17.8197	17.467	NA	NA	NA	19.239	17.552	NA	-1.68698
ph_Q13480:659	Q13480	0	0	0	2.08242e-181	3	-0.065527	1	1	SSGSGSSVADERVDY(1)VVVDQQK	659	Y	2549	GAB1	DFNB26	protein-coding	4q31.21	GRB2 associated binding protein 1 ||| GRB2-associated-binding protein 1	23.5478	23.5662	23.9067	23.1165	23.5757	23.0349	21.7038	21.7521	21.788	21.7244									23.557	23.5116	23.3053	21.7279	21.7562	NA	NA	NA	NA	23.458	21.7421	NA	-1.71589
ph_Q9GZY6:193	Q9GZY6	0	0	0	5.31281e-36	3	0.22425	1	0.805768	T(0.001)GPT(0.002)S(0.002)GLCPS(0.031)AS(0.031)PEEDEES(0.092)EDY(0.806)QNS(0.031)AS(0.004)IHQWR	193	Y	7462	LAT2	HSPC046 LAB NTAL WBSCR15 WBSCR5 WSCR5	protein-coding	7q11.23	linker for activation of T cells family member 2 ||| Linker for activation of T-cells family member 2	21.7484	22.1626	22.0686	21.7081				20.6723	20.6853		20.5184		20.6183	20.1936					21.9555	21.8883	NA	20.6723	20.6853	20.5184	20.4059	NA	NA	21.9219	20.6253	20.4059	-1.29659
ph_Q13480:406	Q13480	0	0	0	8.9399e-68	2	-0.035256	1	1	DASSQDCY(1)DIPR	406	Y	2549	GAB1	DFNB26	protein-coding	4q31.21	GRB2 associated binding protein 1 ||| GRB2-associated-binding protein 1	22.6917	22.707	22.9829	22.6506	22.9118	22.8677	21.1267	21.0114	21.2117	21.2123	20.6235								22.6994	22.8168	22.8898	21.069	21.212	20.6235	NA	NA	NA	22.802	20.9682	NA	-1.83378
ph_Q9H467:275	Q9H467	0	0	0	0.00119968	2	0.61605	1	0.884339	AT(0.116)Y(0.884)INLKPARK	275	Y	79004	CUEDC2	C10orf66 bA18I14.5	protein-coding	10q24.32	CUE domain containing 2 ||| CUE domain-containing protein 2	18.9931		18.6074	18.5456	18.8545	18.4748						18.1122	17.2523					17.4058	18.9931	18.5765	18.6647	NA	NA	18.1122	17.2523	NA	17.4058	18.7448	18.1122	17.3291	-0.632529
ph_Q96QD8:39	Q96QD8	0	0	0	4.04564e-25	3	0.26813	1	0.532577	QAALKS(0.533)HY(0.467)ADVDPENQNFLLESNLGK	39	S	54407	SLC38A2	ATA2 PRO1068 SAT2 SNAT2	protein-coding	12q13.11	solute carrier family 38 member 2 ||| Sodium-coupled neutral amino acid transporter 2	20.4282	20.2489	20.2206			20.5792	18.9145	19.1421	19.1724	19.36	19.1983								20.3385	20.2206	20.5792	19.0283	19.2662	19.1983	NA	NA	NA	20.3795	19.1643	NA	-1.21519
ph_Q9Y446:196	Q9Y446	0	0	0	4.24397e-13	3	0.32545	1	0.526075	LGPGGLDDRY(0.469)S(0.526)LVS(0.005)EQLEPAATSTYR	196	S	11187	PKP3	---	protein-coding	11p15.5	plakophilin 3 ||| Plakophilin-3		19.9329	19.7756			19.3696	18.5674	18.3418	18.2063	17.8343	17.535								19.9329	19.7756	19.3696	18.4546	18.0203	17.535	NA	NA	NA	19.6927	18.0033	NA	-1.6894
ph_P29353:427	P29353	0	0	0	3.37519e-69	3	0.54729	1	0.97204	ELFDDPS(0.028)Y(0.972)VNVQNLDKAR	427	Y	6464	SHC1	SHC SHCA	protein-coding	1q21.3	SHC adaptor protein 1 ||| SHC-transforming protein 1	23.1104	23.79	23.4711	23.8531	23.0891	23.18	22.1532	22.454	21.6074		21.4248						20.8242		23.4502	23.6621	23.1345	22.3036	21.6074	21.4248	NA	NA	20.8242	23.4156	21.7786	20.8242	-1.63704
ph_Q9GZY6:102	Q9GZY6	0	0	0	0.00682775	2	0.30475	2	0.960883	Y(1)QNFS(0.039)KGS(0.961)R	102	S	7462	LAT2	HSPC046 LAB NTAL WBSCR15 WBSCR5 WSCR5	protein-coding	7q11.23	linker for activation of T cells family member 2 ||| Linker for activation of T-cells family member 2	18.7041	18.6508	19.1453	18.8597	18.4028	18.546					18.2192	18.3809	17.6379	17.0392	17.7713	17.9024	18.0416	16.7877	18.6775	19.0025	18.4744	NA	NA	18.3	17.3385	17.8369	17.4146	18.7181	18.3	17.53	-0.418102
ph_Q9GZY6:95	Q9GZY6	0	0	0	0.00682775	2	0.30475	2	0.999995	Y(1)QNFS(0.039)KGS(0.961)R	95	Y	7462	LAT2	HSPC046 LAB NTAL WBSCR15 WBSCR5 WSCR5	protein-coding	7q11.23	linker for activation of T cells family member 2 ||| Linker for activation of T-cells family member 2	18.7041	18.6508	19.1453	18.8597	18.4028	18.546					18.2192	18.3809	17.6379	17.0392	17.7713	17.9024	18.0416	16.7877	18.6775	19.0025	18.4744	NA	NA	18.3	17.3385	17.8369	17.4146	18.7181	18.3	17.53	-0.418102
ph_Q06124:580	Q06124	0	0	0	9.17358e-43	2	0.0081418	1	0.718271	EDS(0.718)ARVY(0.282)ENVGLMQQQK	580	S	5781	PTPN11	BPTP3 CFC JMML METCDS NS1 PTP-1D PTP2C SH-PTP2 SH-PTP3 SHP2	protein-coding	12q24.13	protein tyrosine phosphatase non-receptor type 11 ||| Tyrosine-protein phosphatase non-receptor type 11		22.1381			21.7763		20.4027			20.9402	20.476								22.1381	NA	21.7763	20.4027	20.9402	20.476	NA	NA	NA	21.9572	20.6063	NA	-1.35091
ph_Q9UKY7:244	Q9UKY7	0	0	0	1.66292e-36	2	1.6556	1	1	LQLDNQY(1)AVLENQK	244	Y	55573	CDV3	H41	protein-coding	3q22.1	CDV3 homolog ||| Protein CDV3 homolog	20.9666	21.3715	21.428	21.3622	20.9598	20.8902			20.3339	19.9393	19.8684								21.1691	21.3951	20.925	NA	20.1366	19.8684	NA	NA	NA	21.163	20.0025	NA	-1.16056
ph_O43491:88	O43491	0	0	0	1.93151e-27	2	-2.0424	1	0.986379	S(0.014)Y(0.986)TLVVAK	88	Y	2037	EPB41L2	4.1-G 4.1G	protein-coding	6q23.1-q23.2	erythrocyte membrane protein band 4.1 like 2 ||| Band 4.1-like protein 2	20.2453		20.7794	20.8113	20.8857	20.8347	18.6891	19.827	19.8509		19.7167								20.2453	20.7953	20.8602	19.258	19.8509	19.7167	NA	NA	NA	20.6336	19.6086	NA	-1.02504
ph_Q9HAU0:134	Q9HAU0	0	0	0	6.91681e-41	3	0.35603	1	0.572606	ERPISMINEAS(0.001)NY(0.05)NVT(0.188)S(0.188)DY(0.573)AVHPMSPVGR	134	Y	54477	PLEKHA5	PEPP-2 PEPP2	protein-coding	12p12.3	pleckstrin homology domain containing A5 ||| Pleckstrin homology domain-containing family A member 5		20.2667	20.3394		19.597		18.7186		19.0894						19.1584	19.3407			20.2667	20.3394	19.597	18.7186	19.0894	NA	NA	19.2496	NA	20.0677	18.904	19.2496	-1.16368
ph_Q96QD8:41	Q96QD8	0	0	0	1.43126e-52	2	0.046574	1	0.934367	S(0.066)HY(0.934)ADVDPENQNFLLESNLGK	41	Y	54407	SLC38A2	ATA2 PRO1068 SAT2 SNAT2	protein-coding	12q13.11	solute carrier family 38 member 2 ||| Sodium-coupled neutral amino acid transporter 2	21.0731	21.9982	21.295	21.6845	21.9964	22.0233	20.8801	20.9727	20.913	20.8878	20.4485	20.4145		19.8091					21.5357	21.4898	22.0099	20.9264	20.9004	20.4315	19.8091	NA	NA	21.6784	20.7528	19.8091	-0.925686
ph_Q9NZV1:1033	Q9NZV1	0	0	0	5.57717e-05	2	0.91539	1	0.820671	QNHLQADNFY(0.821)QT(0.179)V	1033	Y	51232	CRIM1	CRIM-1 S52	protein-coding	2p22.2	cysteine rich transmembrane BMP regulator 1 ||| Cysteine-rich motor neuron 1 protein		19.8732			20.1057				18.961		18.8329	18.9007							19.8732	NA	20.1057	NA	18.961	18.8668	NA	NA	NA	19.9894	18.9139	NA	-1.07556
ph_P54760:774	P54760	0	0	0	4.59867e-75	3	0.2023	1	0.991064	FLEENSSDPT(0.004)Y(0.991)T(0.004)SSLGGKIPIR	774	Y	2050	EPHB4	CMAVM2 HFASD HTK LMPHM7 MYK1 TYRO11	protein-coding	7q22.1	EPH receptor B4 ||| Ephrin type-B receptor 4	21.781	22.1278	21.8849	22.0976	21.8542	21.802	21.2465	21.5774	21.104	21.0617		21.1585				21.4483			21.9544	21.9912	21.8281	21.4119	21.0828	21.1585	NA	21.4483	NA	21.9246	21.2178	21.4483	-0.706792
ph_Q86X29:535	Q86X29	0	0	0	2.88267e-14	3	0.12602	1	0.999896	SRDDLY(1)DQDDSRDFPR	535	Y	51599	LSR	ILDR3 LISCH7	protein-coding	19q13.12	lipolysis stimulated lipoprotein receptor ||| Lipolysis-stimulated lipoprotein receptor	20.4559		20.1571	20.0702	20.5234		19.6143		19.6867		19.619								20.4559	20.1137	20.5234	19.6143	19.6867	19.619	NA	NA	NA	20.3643	19.64	NA	-0.724331
ph_Q71UM5:30	Q71UM5	0	0	0	1.18962e-06	2	-0.32175	1	0.675279	LVQSPNS(0.675)Y(0.325)FMDVK	30	S	6232 51065	RPS27 RPS27L	DBA17 MPS-1 MPS1 S27	protein-coding	1q21.3!15q22.2	ribosomal protein S27 ||| 40S ribosomal protein S27 ||| ribosomal protein S27 like ||| 40S ribosomal protein S27-like	19.9901			20.1196	20.6042		20.6414	20.69					20.9492	20.9889			21.0561		19.9901	20.1196	20.6042	20.6657	NA	NA	20.9691	NA	21.0561	20.2379	20.6657	21.0126	0.427755
[truncated: 18 more columns]
